# Supplementary material for: Transposons are important contributors to gene expression variability under selection in rice populations
Source: eLife. 2023 Jul 19;12:RP86324. doi: 10.7554/eLife.86324 (PMC10393045; doi:10.7554/eLife.86324)
Supplement: Supplementary file 1. [file elife-86324-supp1.xlsx]

## Sheet: Sheet1
subsp	TIP_eQTL	gene_ID	transcript_id	adjust.pvalue	effect_size	R2	effect_type	replicate	marker	condition	n (excluding NA)	frequency_indica	TIP_chr	TIP_position	superfamily	gene_chr	gene_start	gene_end	strand	description
indica	TIP_75781	Os12g0628100	OS12T0628100-01	2,12178E-31	-2,876525607	0,716314071	down	R1	TIP	wet	126	0,896825397	chr12	26892919	MITE/Tourist	chr12	26888810	26890166	-	Similar to Actin-depolymerizing factor 6 (ADF-6) (AtADF6). (Os12t0628100-01)
indica	TIP_64322	Os10g0378100	OS10T0378100-01	3,99051E-21	-1,404500962	0,58054073	down	R1	TIP	wet	126	0,214285714	chr10	12094053	DNAauto/CACTA	chr10	12090264	12098560	-	Similar to Cytochrome P450 family protein, expressed. (Os10t0378100-01)
indica	TIP_3390	Os01g0352100	OS01T0352100-01	2,54636E-20	-1,866582478	0,565069339	down	R1	TIP	wet	126	0,73015873	chr01	14098954	LINE/unknown	chr01	14101994	14108083	+	2OG-Fe(II) oxygenase domain containing protein. (Os01t0352100-01)
indica	TIP_70824	Os11g0595200	OS11T0595200-01	5,42561E-19	-1,404433352	0,540999065	down	R1	TIP	wet	126	0,603174603	chr11	22661298	DNAnona/MULE	chr11	22660534	22662341	+	PAP fibrillin family protein. (Os11t0595200-01)
indica	TIP_3391	Os01g0352100	OS01T0352100-01	5,42561E-19	-1,751124457	0,53945909	down	R1	TIP	wet	126	0,69047619	chr01	14102762	DNAnona/Helitron	chr01	14101994	14108083	+	2OG-Fe(II) oxygenase domain containing protein. (Os01t0352100-01)
indica	TIP_41765	Os06g0254600	OS06T0254600-01	1,18902E-18	-1,319957837	0,53226971	down	R1	TIP	wet	126	0,46031746	chr06	7995374	MITE/Tourist	chr06	7996917	8004842	-	Caleosin related family protein. (Os06t0254600-01)
indica	TIP_49742	Os07g0475000	OS07T0475000-01	5,83643E-18	-1,099315279	0,519012256	down	R1	TIP	wet	126	0,150793651	chr07	17140585	LTR/Copia	chr07	17136166	17144612	+	Conserved hypothetical protein. (Os07t0475000-01)
indica	TIP_542	Os01g0152700	OS01T0152700-01	6,93361E-18	-1,069101329	0,516651344	down	R1	TIP	wet	126	0,285714286	chr01	2837603	SINE/unknown	chr01	2837892	2838171	-	Similar to Histone H2B (CaH2B). (Os01t0152700-01)
indica	TIP_26201	Os03g0774600	OS03T0774600-01	1,684E-17	1,480557446	0,508810099	up	R1	TIP	wet	126	0,920634921	chr03	32108992	DNAnona/MULE	chr03	32113298	32113796	+	Conserved hypothetical protein. (Os03t0774600-01)
indica	TIP_543	Os01g0152700	OS01T0152700-01	3,32947E-17	1,023333968	0,502583281	up	R1	TIP	wet	126	0,682539683	chr01	2839521	LINE/unknown	chr01	2837892	2838171	-	Similar to Histone H2B (CaH2B). (Os01t0152700-01)
indica	TIP_59883	Os09g0380400	OS09T0380400-01	8,10179E-16	0,871048559	0,475724213	up	R1	TIP	wet	126	0,785714286	chr09	12837802	DNAnona/MULE	chr09	12833971	12834961	+	Conserved hypothetical protein. (Os09t0380400-01)
indica	TIP_70825	Os11g0595200	OS11T0595200-01	4,60717E-15	-1,267441702	0,460201186	down	R1	TIP	wet	126	0,5	chr11	22662221	MITE/Tourist	chr11	22660534	22662341	+	PAP fibrillin family protein. (Os11t0595200-01)
indica	TIP_40623	Os06g0159900	OS06T0159900-01	5,73954E-15	0,595086157	0,457608493	up	R1	TIP	wet	126	0,238095238	chr06	3059828	MITE/Stow	chr06	3051248	3055005	+	Similar to Arm repeat containing protein. (Os06t0159900-01)
indica	TIP_36305	Os05g0320800	OS05T0320800-01	1,20816E-13	-0,509839537	0,429258575	down	R1	TIP	wet	126	0,841269841	chr05	14903317	MITE/Tourist	chr05	14906587	14907252	+	Hypothetical protein. (Os05t0320800-01)
indica	TIP_66361	Os10g0536100	OS10T0536100-01	1,20816E-13	1,941834838	0,429255644	up	R1	TIP	wet	124	0,89516129	chr10	20863697	DNAauto/PILE	chr10	20863187	20873635	+	MIKC-type MADS-box protein, Long day (LD)-specific negative regulator of flowering (Os10t0536100-01)
indica	TIP_39336	Os05g0546300	OS05T0546300-01	1,39739E-13	0,483227531	0,427338747	up	R1	TIP	wet	126	0,293650794	chr05	27121709	MITE/Tourist	chr05	27119121	27120202	+	Hypothetical protein. (Os05t0546300-01)
indica	TIP_58769	Os09g0270900	OS09T0270900-02	1,83479E-13	0,581864597	0,424287295	up	R1	TIP	wet	119	0,218487395	chr09	5312050	LTR/Gypsy	chr09	5306896	5309044	-	BolA-like protein domain containing protein. (Os09t0270900-01);Similar to EMB1374. (Os09t0270900-02)
indica	TIP_39334	Os05g0546300	OS05T0546300-01	8,54536E-13	0,469379925	0,409442098	up	R1	TIP	wet	126	0,301587302	chr05	27119972	DNAauto/MULE	chr05	27119121	27120202	+	Hypothetical protein. (Os05t0546300-01)
indica	TIP_58942	Os09g0287500	OS09T0287500-01	1,53338E-12	-0,853242311	0,403395504	down	R1	TIP	wet	125	0,688	chr09	6437899	DNAnona/Helitron	chr09	6439640	6441905	-	Protein of unknown function DUF565 family protein. (Os09t0287500-01)
indica	TIP_47761	Os07g0196200	OS07T0196200-01	1,94914E-12	-1,346704736	0,400601777	down	R1	TIP	wet	126	0,373015873	chr07	5219381	DNAauto/MULE	chr07	5216029	5217014	-	Protein of unknown function DUF3252 domain containing protein. (Os07t0196200-01)
indica	TIP_67392	Os11g0150800	OS11T0150800-01	1,94914E-12	0,339338832	0,400152452	up	R1	TIP	wet	124	0,072580645	chr11	2363757	DNAnona/MULEtir	chr11	2363882	2364482	+	Hypothetical protein. (Os11t0150800-01)
indica	TIP_72732	Os12g0226400	OS12T0226400-00	2,08453E-12	0,635186233	0,39906432	up	R1	TIP	wet	126	0,365079365	chr12	6886206	DNAnona/POLE	chr12	6889996	6896735	+	Similar to 2-alkenal reductase. (Os12t0226400-00)
indica	TIP_46611	Os07g0109700	OS07T0109700-01	2,63822E-12	-1,110293671	0,396375831	down	R1	TIP	wet	126	0,126984127	chr07	537085	LTR/Gypsy	chr07	536836	537792	-	Conserved hypothetical protein. (Os07t0109700-01)
indica	TIP_29623	Os04g0405401	OS04T0405401-01	4,95469E-12	0,420070439	0,38986833	up	R1	TIP	wet	120	0,2	chr04	20119077	DNAnona/Helitron	chr04	20117097	20119136	-	Hypothetical conserved gene. (Os04t0405401-01)
indica	TIP_19871	Os03g0219200	OS03T0219200-01	5,86373E-12	-0,840024081	0,387830304	down	R1	TIP	wet	126	0,111111111	chr03	6275388	DNAnona/MULE	chr03	6271895	6275386	-	CuZn superoxide dismutase, Response to salinity, drought, and oxidative stress (Os03t0219200-01)
indica	TIP_72733	Os12g0226400	OS12T0226400-00	7,28911E-12	-0,630046709	0,384950556	down	R1	TIP	wet	126	0,650793651	chr12	6889433	LTR/Gypsy	chr12	6889996	6896735	+	Similar to 2-alkenal reductase. (Os12t0226400-00)
indica	TIP_72734	Os12g0226400	OS12T0226400-00	7,28911E-12	-0,630046709	0,384950556	down	R1	TIP	wet	126	0,650793651	chr12	6890512	LTR/Gypsy	chr12	6889996	6896735	+	Similar to 2-alkenal reductase. (Os12t0226400-00)
indica	TIP_28709	Os04g0338100	OS04T0338100-01	2,80828E-11	-0,674508398	0,371231853	down	R1	TIP	wet	126	0,436507937	chr04	15927749	LTR/Copia	chr04	15924375	15928109	+	Similar to IN2-2 protein. (Os04t0338100-01)
indica	TIP_67485	Os11g0155600	OS11T0155600-01	3,50463E-11	-0,872625268	0,368658121	down	R1	TIP	wet	126	0,246031746	chr11	2606655	MITE/Tourist	chr11	2605752	2614119	-	Conserved hypothetical protein. (Os11t0155600-01)
indica	TIP_32891	Os04g0653000	OS04T0653000-01	6,19628E-11	0,759700558	0,362562198	up	R1	TIP	wet	126	0,174603175	chr04	33303047	MITE/Tourist	chr04	33306468	33310169	+	Jasmonic acid (JA) signalling repressor, Regulation of spikelet development (Os04t0653000-01)
indica	TIP_16897	Os02g0721100	OS02T0721100-01	6,5564E-11	0,532327221	0,361558156	up	R1	TIP	wet	126	0,198412698	chr02	29918000	DNAauto/MULE	chr02	29919262	29920338	-	Similar to E2 ubiquitin-conjugating enzyme UbcH5B (Fragment). (Os02t0721100-01)
indica	TIP_32892	Os04g0653000	OS04T0653000-01	6,5564E-11	0,772554191	0,361333402	up	R1	TIP	wet	126	0,166666667	chr04	33303873	MITE/Tourist	chr04	33306468	33310169	+	Jasmonic acid (JA) signalling repressor, Regulation of spikelet development (Os04t0653000-01)
indica	TIP_15311	Os02g0600200	OS02T0600200-01	6,55932E-11	-0,793862483	0,361016091	down	R1	TIP	wet	126	0,174603175	chr02	23466166	MITE/Tourist	chr02	23465969	23468038	-	IQ calmodulin-binding region domain containing protein. (Os02t0600200-01);Similar to predicted protein. (Os02t0600200-02)
indica	TIP_24692	Os03g0673600	OS03T0673600-01	9,86516E-11	-1,382335124	0,356548197	down	R1	TIP	wet	126	0,682539683	chr03	26616395	MITE/Tourist	chr03	26617086	26618211	-	Conserved hypothetical protein. (Os03t0673600-01)
indica	TIP_5273	Os01g0611300	OS01T0611300-01	2,18353E-10	-0,319305957	0,348065889	down	R1	TIP	wet	126	0,642857143	chr01	24196234	DNAnona/MULE	chr01	24195504	24196616	+	Similar to Metal tolerance protein 7. (Os01t0611300-01)
indica	TIP_3392	Os01g0352100	OS01T0352100-01	2,35862E-10	-1,322168649	0,346693564	down	R1	TIP	wet	126	0,595238095	chr01	14103644	DNAnona/Helitron	chr01	14101994	14108083	+	2OG-Fe(II) oxygenase domain containing protein. (Os01t0352100-01)
indica	TIP_49904	Os07g0486500	OS07T0486500-02	2,35862E-10	-0,529404118	0,346688988	down	R1	TIP	wet	126	0,484126984	chr07	17912109	MITE/Tourist	chr07	17907341	17912298	+	RhoGAP domain containing protein. (Os07t0486500-01);RhoGAP domain containing protein. (Os07t0486500-02)
indica	TIP_70449	Os11g0539600	OS11T0539600-00	4,42109E-10	0,52579025	0,339650208	up	R1	TIP	wet	123	0,170731707	chr11	19696468	DNAnona/hAT	chr11	19701215	19702758	-	Conserved hypothetical protein. (Os11t0539600-00)
indica	TIP_38559	Os05g0488000	OS05T0488000-01	4,42109E-10	-0,638902021	0,339579665	down	R1	TIP	wet	126	0,761904762	chr05	23996139	DNAnona/MULE	chr05	23996148	23997293	+	Peptidase C1A, papain family protein. (Os05t0488000-01)
indica	TIP_59881	Os09g0380400	OS09T0380400-01	5,11018E-10	0,746592011	0,337791531	up	R1	TIP	wet	123	0,788617886	chr09	12833738	DNAnona/MULE	chr09	12833971	12834961	+	Conserved hypothetical protein. (Os09t0380400-01)
indica	TIP_50987	Os07g0573800	OS07T0573800-02	8,57953E-10	-0,821950204	0,332056333	down	R1	TIP	wet	126	0,182539683	chr07	23194375	DNAnona/MULE	chr07	23194229	23199780	-	Similar to root border cell-specific protein. (Os07t0573800-01);FMN-binding split barrel domain containing protein. (Os07t0573800-02);FMN-binding split barrel domain containing protein. (Os07t0573800-03);Hypothetical protein. (Os07t0573800-04)
indica	TIP_40866	Os06g0185900	OS06T0185900-01	1,34636E-09	-1,203406957	0,327002038	down	R1	TIP	wet	118	0,06779661	chr06	4320286	MITE/Tourist	chr06	4321654	4325071	+	Similar to Glutathione peroxidase. (Os06t0185900-01)
indica	TIP_40867	Os06g0185900	OS06T0185900-01	1,48127E-09	-1,19829884	0,325729045	down	R1	TIP	wet	126	0,063492063	chr06	4322394	DNAnona/Helitron	chr06	4321654	4325071	+	Similar to Glutathione peroxidase. (Os06t0185900-01)
indica	TIP_2107	Os01g0256500	OS01T0256500-02	1,87105E-09	2,133163531	0,32297705	up	R1	TIP	wet	110	0,909090909	chr01	8542846	MITE/Stow	chr01	8546065	8546869	-	Similar to ZnI. (Os01t0256500-02)
indica	TIP_41619	Os06g0241200	OS06T0241200-01	2,42181E-09	0,377990544	0,319956389	up	R1	TIP	wet	119	0,277310924	chr06	7329511	DNAnona/MULE	chr06	7333167	7336677	+	Conserved hypothetical protein. (Os06t0241200-01)
indica	TIP_32894	Os04g0653000	OS04T0653000-01	4,29742E-09	0,719605411	0,313501082	up	R1	TIP	wet	126	0,166666667	chr04	33310571	MITE/Tourist	chr04	33306468	33310169	+	Jasmonic acid (JA) signalling repressor, Regulation of spikelet development (Os04t0653000-01)
indica	TIP_29027	Os04g0364800	OS04T0364800-00	4,56562E-09	0,559669866	0,312607108	up	R1	TIP	wet	112	0,5625	chr04	17560371	MITE/Stow	chr04	17560683	17561234	+	Barwin-related endoglucanase domain containing protein. (Os04t0364800-00)
indica	TIP_53901	Os08g0227200	OS08T0227200-02	4,68095E-09	0,421737406	0,31210541	up	R1	TIP	wet	126	0,349206349	chr08	7756290	DNAnona/hAT	chr08	7760699	7762222	-	Kelch related domain containing protein. (Os08t0227200-02)
indica	TIP_24695	Os03g0673600	OS03T0673600-01	5,9326E-09	1,35419444	0,309289698	up	R1	TIP	wet	124	0,274193548	chr03	26618960	DNAnona/hAT	chr03	26617086	26618211	-	Conserved hypothetical protein. (Os03t0673600-01)
indica	TIP_16476	Os02g0687900	OS02T0687900-01	2,13386E-08	-1,242474506	0,294908892	down	R1	TIP	wet	126	0,896825397	chr02	28212452	DNAnona/CACTA	chr02	28212163	28216943	+	Peptidase S10, serine carboxypeptidase family protein. (Os02t0687900-01)
indica	TIP_53604	Os08g0183900	OS08T0183900-01	2,81788E-08	-0,953634642	0,291575166	down	R1	TIP	wet	126	0,126984127	chr08	4898051	DNAnona/unknown	chr08	4897613	4900341	-	Similar to dihydroflavonol-4-reductase. (Os08t0183900-01)
indica	TIP_32055	Os04g0585700	OS04T0585700-01	3,74956E-08	-0,767003514	0,288145287	down	R1	TIP	wet	126	0,198412698	chr04	29592939	MITE/Tourist	chr04	29588252	29590515	-	Protein of unknown function DUF581 family protein. (Os04t0585700-01)
indica	TIP_8081	Os01g0825800	OS01T0825800-02	5,53698E-08	-0,358101906	0,283524126	down	R1	TIP	wet	126	0,611111111	chr01	35321001	DNAnona/Helitron	chr01	35320840	35327164	-	Amino acid transporter, transmembrane domain containing protein. (Os01t0825800-01);Similar to Amino acid-polyamine transporter. (Os01t0825800-02)
indica	TIP_32053	Os04g0585700	OS04T0585700-01	7,30339E-08	-0,746097054	0,280165824	down	R1	TIP	wet	125	0,208	chr04	29586787	MITE/Tourist	chr04	29588252	29590515	-	Protein of unknown function DUF581 family protein. (Os04t0585700-01)
indica	TIP_38610	Os05g0492500	OS05T0492500-01	1,09494E-07	0,658624064	0,275330895	up	R1	TIP	wet	112	0,285714286	chr05	24196744	DNAnona/Helitron	chr05	24194658	24202634	-	Hypothetical protein. (Os05t0492500-01)
indica	TIP_15753	Os02g0635000	OS02T0635000-01	2,08426E-07	0,666660341	0,267711926	up	R1	TIP	wet	126	0,301587302	chr02	25459384	DNAnona/MULE	chr02	25459520	25462586	+	Nitrilase, Regulation of root growth (Os02t0635000-01)
indica	TIP_98	Os01g0108400	OS01T0108400-00	2,22316E-07	-0,501623537	0,266760137	down	R1	TIP	wet	126	0,587301587	chr01	457422	MITE/Stow	chr01	455707	457425	+	Helix-loop-helix DNA-binding domain containing protein. (Os01t0108400-00)
indica	TIP_20554	Os03g0269900	OS03T0269900-01	2,23682E-07	0,639225596	0,266487688	up	R1	TIP	wet	126	0,642857143	chr03	9020009	DNAnona/unknown	chr03	9011629	9016463	+	Protein of unknown function DUF604 family protein. (Os03t0269900-01)
indica	TIP_34204	Os05g0161500	OS05T0161500-01	2,51391E-07	-0,688620949	0,264934883	down	R1	TIP	wet	126	0,349206349	chr05	3628628	DNAnona/hAT	chr05	3626394	3629080	+	Calcium-activated (p)ppGpp synthetase, Ca<sup>2+</sup>-activated RelA-SpoT homolog 2 (Os05t0161500-01)
indica	TIP_18343	Os03g0105401	OS03T0105401-00	2,55041E-07	-0,35582719	0,264572293	down	R1	TIP	wet	126	0,650793651	chr03	338381	LTR/Gypsy	chr03	324659	337243	+	Hypothetical gene. (Os03t0105401-00)
indica	TIP_46627	Os07g0110800	OS07T0110800-01	3,89017E-07	0,856364192	0,259459904	up	R1	TIP	wet	108	0,638888889	chr07	606924	MITE/Tourist	chr07	604586	607425	-	Conserved hypothetical protein. (Os07t0110800-01)
indica	TIP_41398	Os06g0225300	OS06T0225300-02	4,35488E-07	-0,368857006	0,257949256	down	R1	TIP	wet	126	0,825396825	chr06	6484782	DNAnona/MULE	chr06	6484167	6488553	-	Similar to SERK1 (Fragment). (Os06t0225300-01);Similar to SERK1 (Fragment). (Os06t0225300-02)
indica	TIP_63074	Os10g0159800	OS10T0159800-04	4,4514E-07	0,629549939	0,257504991	up	R1	TIP	wet	126	0,595238095	chr10	3798513	DNAnona/Helitron	chr10	3793940	3803819	-	Alcohol dehydrogenase superfamily, zinc-containing protein. (Os10t0159800-01);Similar to Alcohol dehydrogenase 2. (Os10t0159800-03);Similar to Alcohol dehydrogenase 2. (Os10t0159800-04)
indica	TIP_40552	Os06g0154400	OS06T0154400-01	6,42409E-07	0,831163295	0,253009254	up	R1	TIP	wet	121	0,066115702	chr06	2802746	DNAnona/unknown	chr06	2803042	2806247	+	Domain of unknown function DUF676, lipase-like domain containing protein. (Os06t0154400-01)
indica	TIP_48004	Os07g0212200	OS07T0212200-01	9,09098E-07	0,747936614	0,248723773	up	R1	TIP	wet	122	0,827868852	chr07	6141632	DNAnona/MULE	chr07	6134016	6136740	+	Similar to MRNA-binding protein (Fragment). (Os07t0212200-01)
indica	TIP_67482	Os11g0155600	OS11T0155600-01	1,02112E-06	-0,810632496	0,247165002	down	R1	TIP	wet	126	0,174603175	chr11	2603743	LINE/unknown	chr11	2605752	2614119	-	Conserved hypothetical protein. (Os11t0155600-01)
indica	TIP_14431	Os02g0537700	OS02T0537700-01	1,12887E-06	-0,411189305	0,24579489	down	R1	TIP	wet	108	0,240740741	chr02	19877165	DNAnona/hAT	chr02	19882081	19885745	+	2-Cys peroxiredoxin (EC 1.11.1.15), Stomatal closure, Potassium deficiency tolerance (Os02t0537700-01)
indica	TIP_14359	Os02g0533800	OS02T0533800-01	1,21411E-06	-0,561004332	0,244752694	down	R1	TIP	wet	125	0,592	chr02	19649688	MITE/Tourist	chr02	19648496	19649478	-	Similar to ATPase inhibitor. (Os02t0533800-01)
indica	TIP_64743	Os10g0409566	OS10T0409566-01	1,28847E-06	0,266803339	0,243870968	up	R1	TIP	wet	124	0,032258065	chr10	14194920	DNAauto/CACTA	chr10	14190128	14194064	+	Hypothetical gene. (Os10t0409566-01)
indica	TIP_48084	Os07g0223766	OS07T0223766-01	1,37949E-06	0,454706676	0,242885646	up	R1	TIP	wet	121	0,074380165	chr07	6849611	MITE/Tourist	chr07	6849842	6851728	-	Hypothetical conserved gene. (Os07t0223766-01)
indica	TIP_41399	Os06g0225300	OS06T0225300-02	1,56323E-06	-0,350546673	0,241223128	down	R1	TIP	wet	126	0,817460317	chr06	6487391	MITE/Stow	chr06	6484167	6488553	-	Similar to SERK1 (Fragment). (Os06t0225300-01);Similar to SERK1 (Fragment). (Os06t0225300-02)
indica	TIP_8592	Os01g0869800	OS01T0869800-01	1,70696E-06	0,468095589	0,240003704	up	R1	TIP	wet	126	0,079365079	chr01	37695386	DNAauto/MULE	chr01	37697024	37699582	+	22-kDa Photosystem II protein, Photoprotection (Os01t0869800-01)
indica	TIP_9857	Os01g0965900	OS01T0965900-01	1,81331E-06	-0,597138102	0,238965508	down	R1	TIP	wet	126	0,785714286	chr01	42592996	LINE/unknown	chr01	42587307	42590270	-	Conserved hypothetical protein. (Os01t0965900-01)
indica	TIP_2128	Os01g0258600	OS01T0258600-00	1,81331E-06	0,529543903	0,238951545	up	R1	TIP	wet	125	0,744	chr01	8656782	DNAnona/MULE	chr01	8657066	8658466	+	Plant-specific small protein, Hybrid incompatibility, Pollen germination (Os01t0258600-01)
indica	TIP_60553	Os09g0428900	OS09T0428900-01	1,92643E-06	0,861061351	0,238064954	up	R1	TIP	wet	112	0,071428571	chr09	15587803	LINE/unknown	chr09	15583194	15586475	+	Similar to Conserved protein. (Os09t0428900-01)
indica	TIP_2025	Os01g0249900	OS01T0249900-01	2,51808E-06	-0,430573935	0,23463313	down	R1	TIP	wet	126	0,896825397	chr01	8230014	MITE/Tourist	chr01	8234625	8235833	-	Protein of unknown function DUF573 family protein. (Os01t0249900-01)
indica	TIP_70450	Os11g0539600	OS11T0539600-00	2,51808E-06	-0,347053869	0,234528343	down	R1	TIP	wet	115	0,6	chr11	19703784	MITE/Tourist	chr11	19701215	19702758	-	Conserved hypothetical protein. (Os11t0539600-00)
indica	TIP_15728	Os02g0632800	OS02T0632800-01	2,57838E-06	0,53462897	0,234087665	up	R1	TIP	wet	122	0,532786885	chr02	25350618	DNAnona/MULE	chr02	25348252	25351744	-	Wall-associated kinase, Positive regulation of rice blast resistance (Os02t0632800-01)
indica	TIP_53446	Os08g0170700	OS08T0170700-00	2,78616E-06	-0,540239963	0,232999141	down	R1	TIP	wet	126	0,253968254	chr08	4135256	DNAnona/unknown	chr08	4135126	4138360	-	Disease resistance protein domain containing protein. (Os08t0170700-00)
indica	TIP_29625	Os04g0405401	OS04T0405401-01	2,97273E-06	-0,280046959	0,232064482	down	R1	TIP	wet	126	0,714285714	chr04	20122884	MITE/Tourist	chr04	20117097	20119136	-	Hypothetical conserved gene. (Os04t0405401-01)
indica	TIP_67483	Os11g0155600	OS11T0155600-01	3,05523E-06	-0,832422117	0,231583459	down	R1	TIP	wet	126	0,150793651	chr11	2604522	MITE/Tourist	chr11	2605752	2614119	-	Conserved hypothetical protein. (Os11t0155600-01)
indica	TIP_24695	Os03g0673700	OS03T0673700-01	7,63804E-06	0,579546022	0,220283485	up	R1	TIP	wet	124	0,274193548	chr03	26618960	DNAnona/hAT	chr03	26622941	26623429	+	Similar to predicted protein. (Os03t0673700-01)
indica	TIP_9856	Os01g0965900	OS01T0965900-01	1,06852E-05	-0,553428148	0,216012516	down	R1	TIP	wet	126	0,76984127	chr01	42586676	MITE/Stow	chr01	42587307	42590270	-	Conserved hypothetical protein. (Os01t0965900-01)
indica	TIP_27051	Os03g0846400	OS03T0846400-01	1,07317E-05	-0,911475972	0,215665989	down	R1	TIP	wet	126	0,126984127	chr03	35585064	DNAnona/hAT	chr03	35589787	35596069	+	Peptidase, trypsin-like serine and cysteine domain containing protein. (Os03t0846400-01)
indica	TIP_27055	Os03g0846400	OS03T0846400-01	1,07317E-05	-0,911475972	0,215665989	down	R1	TIP	wet	126	0,126984127	chr03	35595754	DNAauto/MULE	chr03	35589787	35596069	+	Peptidase, trypsin-like serine and cysteine domain containing protein. (Os03t0846400-01)
indica	TIP_32057	Os04g0585700	OS04T0585700-01	1,26275E-05	-0,650655659	0,213516382	down	R1	TIP	wet	126	0,206349206	chr04	29594995	LTR/Copia	chr04	29588252	29590515	-	Protein of unknown function DUF581 family protein. (Os04t0585700-01)
indica	TIP_41202	Os06g0211300	OS06T0211300-01	1,36331E-05	0,447460785	0,212258987	up	R1	TIP	wet	126	0,531746032	chr06	5689446	DNAnona/Helitron	chr06	5688697	5690594	+	Short-chain dehydrogenase/reductase SDR domain containing protein. (Os06t0211300-01)
indica	TIP_50502	Os07g0534000	OS07T0534000-01	1,36331E-05	-0,585983908	0,212103993	down	R1	TIP	wet	126	0,80952381	chr07	20938340	MITE/Tourist	chr07	20936091	20941652	+	Similar to permeases of the major facilitator superfamily. (Os07t0534000-01)
indica	TIP_50501	Os07g0534000	OS07T0534000-01	1,36331E-05	0,585983908	0,212103993	up	R1	TIP	wet	126	0,19047619	chr07	20937080	MITE/Stow	chr07	20936091	20941652	+	Similar to permeases of the major facilitator superfamily. (Os07t0534000-01)
indica	TIP_544	Os01g0152900	OS01T0152900-00	1,36331E-05	-0,471357587	0,212008269	down	R1	TIP	wet	126	0,301587302	chr01	2844146	MITE/Tourist	chr01	2844503	2845212	-	Similar to Histone H2B.1. (Os01t0152900-00)
indica	TIP_4852	Os01g0581300	OS01T0581300-01	1,41379E-05	0,447556919	0,21142197	up	R1	TIP	wet	126	0,5	chr01	22535541	SINE/unknown	chr01	22535013	22538645	+	Lycopene epsilon-cyclase (Os01t0581300-01)
indica	TIP_75580	Os12g0615400	OS12T0615400-01	1,62739E-05	-0,241437797	0,209544102	down	R1	TIP	wet	126	0,293650794	chr12	26103760	MITE/Stow	chr12	26101180	26103543	-	Similar to 37 kDa inner envelope membrane protein, chloroplast precursor (E37). (Os12t0615400-01)
indica	TIP_6190	Os01g0673600	OS01T0673600-01	1,85643E-05	0,329995529	0,20752295	up	R1	TIP	wet	126	0,642857143	chr01	27675871	DNAnona/MULE	chr01	27668585	27671611	-	Ubiquitin-conjugating enzyme, Error-free DNA damage tolerance, Regulation of abiotic stress and hormone responses (Os01t0673600-01)
indica	TIP_29156	Os04g0379900	OS04T0379900-01	1,85643E-05	-0,591027252	0,207511557	down	R1	TIP	wet	126	0,238095238	chr04	18559927	SINE/unknown	chr04	18560190	18564376	-	Similar to Acyl-[acyl-carrier-protein] desaturase, chloroplast precursor (EC 1.14.19.2) (Stearoyl-ACP desaturase). (Os04t0379900-01)
indica	TIP_29157	Os04g0379900	OS04T0379900-01	1,85643E-05	-0,591027252	0,207511557	down	R1	TIP	wet	126	0,238095238	chr04	18562388	MITE/Tourist	chr04	18560190	18564376	-	Similar to Acyl-[acyl-carrier-protein] desaturase, chloroplast precursor (EC 1.14.19.2) (Stearoyl-ACP desaturase). (Os04t0379900-01)
indica	TIP_61206	Os09g0470500	OS09T0470500-01	1,96421E-05	-0,62220611	0,206679899	down	R1	TIP	wet	126	0,23015873	chr09	17909769	MITE/Tourist	chr09	17903166	17904869	+	Homeodomain-leucine zipper (HD-Zip) protein, Regulation of gibberellin signaling (Os09t0470500-01)
indica	TIP_40181	Os06g0124900	OS06T0124900-01	1,97036E-05	-0,737363055	0,206512117	down	R1	TIP	wet	126	0,904761905	chr06	1343058	DNAnona/hAT	chr06	1341610	1344490	+	Conserved hypothetical protein. (Os06t0124900-01)
indica	TIP_2555	Os01g0286100	OS01T0286100-01	2,13765E-05	-0,573054634	0,205370178	down	R1	TIP	wet	126	0,238095238	chr01	10275976	LTR/Gypsy	chr01	10271157	10274304	-	Phytochrome-interacting factor-like protein, Basic helix-loop-helix factor, Repression of seedling growth in the dark (Os01t0286100-01)
indica	TIP_55228	Os08g0366100	OS08T0366100-01	2,39373E-05	0,29743671	0,20383331	up	R1	TIP	wet	119	0,411764706	chr08	16981930	MITE/Tourist	chr08	16982279	16985259	+	Similar to Endothelial differentiation-related factor 1 (EDF-1) (Multiprotein bridging factor 1) (MBF1). (Os08t0366100-01)
indica	TIP_2027	Os01g0250900	OS01T0250900-01	2,72514E-05	-0,379364007	0,202088653	down	R1	TIP	wet	126	0,26984127	chr01	8273288	DNAnona/MULE	chr01	8275474	8283959	+	HAD superfamily (subfamily IG) hydrolase, 5'-Nucleotidase protein. (Os01t0250900-01)
indica	TIP_9723	Os01g0954000	OS01T0954000-01	3,09402E-05	0,850410969	0,200375927	up	R1	TIP	wet	126	0,119047619	chr01	42023200	LTR/Copia	chr01	42018073	42019444	+	NADPH-dependent FMN reductase family protein. (Os01t0954000-01)
indica	TIP_3413	Os01g0355800	OS01T0355800-00	3,26909E-05	0,37600778	0,199563005	up	R1	TIP	wet	124	0,080645161	chr01	14322251	MITE/Stow	chr01	14326183	14327100	+	Similar to Esterase PIR7A. (Os01t0355800-00)
indica	TIP_41203	Os06g0211300	OS06T0211300-01	4,50841E-05	0,428813139	0,195281304	up	R1	TIP	wet	126	0,523809524	chr06	5690171	MITE/Stow	chr06	5688697	5690594	+	Short-chain dehydrogenase/reductase SDR domain containing protein. (Os06t0211300-01)
indica	TIP_41205	Os06g0211300	OS06T0211300-01	4,50841E-05	0,428813139	0,195281304	up	R1	TIP	wet	126	0,523809524	chr06	5694954	DNAnona/MULEtir	chr06	5688697	5690594	+	Short-chain dehydrogenase/reductase SDR domain containing protein. (Os06t0211300-01)
indica	TIP_31280	Os04g0531750	OS04T0531750-00	4,72244E-05	-0,584646252	0,194576602	down	R1	TIP	wet	126	0,214285714	chr04	26584546	LTR/Gypsy	chr04	26583060	26584951	+	Similar to OSIGBa0125M19.13 protein. (Os04t0531750-00)
indica	TIP_40526	Os06g0152700	OS06T0152700-01	4,9314E-05	0,489266129	0,193911381	up	R1	TIP	wet	123	0,073170732	chr06	2721158	LINE/unknown	chr06	2717876	2721617	-	Protein of unknown function DUF821, CAP10-like family protein. (Os06t0152700-01)
indica	TIP_24698	Os03g0673600	OS03T0673600-01	5,11109E-05	1,142119354	0,193341575	up	R1	TIP	wet	115	0,252173913	chr03	26622142	DNAnona/CACTA	chr03	26617086	26618211	-	Conserved hypothetical protein. (Os03t0673600-01)
indica	TIP_697	Os01g0170900	OS01T0170900-01	5,36835E-05	-0,501112444	0,19260435	down	R1	TIP	wet	126	0,634920635	chr01	3665958	SINE/unknown	chr01	3665042	3666044	-	Conserved hypothetical protein. (Os01t0170900-01)
indica	TIP_14432	Os02g0537700	OS02T0537700-01	5,94046E-05	-0,386311477	0,19106531	down	R1	TIP	wet	122	0,172131148	chr02	19881961	DNAnona/Helitron	chr02	19882081	19885745	+	2-Cys peroxiredoxin (EC 1.11.1.15), Stomatal closure, Potassium deficiency tolerance (Os02t0537700-01)
indica	TIP_4826	Os01g0579900	OS01T0579900-01	5,94046E-05	0,453798258	0,191015125	up	R1	TIP	wet	126	0,69047619	chr01	22436859	MITE/Stow	chr01	22439040	22441966	-	Esterase/lipase/thioesterase domain containing protein. (Os01t0579900-01)
indica	TIP_50500	Os07g0534000	OS07T0534000-01	5,94046E-05	0,610155365	0,190978421	up	R1	TIP	wet	126	0,150793651	chr07	20936030	DNAnona/Helitron	chr07	20936091	20941652	+	Similar to permeases of the major facilitator superfamily. (Os07t0534000-01)
indica	TIP_52200	Os07g0671800	OS07T0671800-01	6,78297E-05	-0,459335682	0,189185863	down	R1	TIP	wet	126	0,079365079	chr07	28408277	DNAnona/hAT	chr07	28410540	28412846	+	Similar to Stress-related protein-like protein (Fragment). (Os07t0671800-01)
indica	TIP_162	Os01g0115700	OS01T0115700-00	9,96362E-05	-0,3944435	0,184187808	down	R1	TIP	wet	122	0,401639344	chr01	853367	LINE/unknown	chr01	851835	854599	-	Receptor-like kinase 19 (Os01t0115700-01)
indica	TIP_63	Os01g0105900	OS01T0105900-01	0,000105981	-0,51044399	0,183267147	down	R1	TIP	wet	126	0,174603175	chr01	312684	MITE/Tourist	chr01	309520	313170	-	PfkB carbohydrate kinase protein, Regulation of plant height and leaf structure (Os01t0105900-01)
indica	TIP_51333	Os07g0601000	OS07T0601000-01	0,000105981	-1,068247847	0,183177484	down	R1	TIP	wet	126	0,936507937	chr07	24518510	MITE/Stow	chr07	24515344	24517707	-	Similar to NADPH HC toxin reductase (Fragment). (Os07t0601000-01)
indica	TIP_41619	Os06g0241100	OS06T0241100-01	0,000110583	0,293460424	0,182524931	up	R1	TIP	wet	119	0,277310924	chr06	7329511	DNAnona/MULE	chr06	7325616	7327449	-	Membrane-associated kinase-5, Response to drought stress in tolerant genotype, Response to submergence (Os06t0241100-01)
indica	TIP_170	Os01g0117600	OS01T0117600-01	0,000110647	0,358792727	0,18240802	up	R1	TIP	wet	126	0,166666667	chr01	1002223	DNAnona/hAT	chr01	994712	997262	-	Protein kinase, catalytic domain domain containing protein. (Os01t0117600-01)
indica	TIP_55229	Os08g0366100	OS08T0366100-01	0,000116537	-0,269663436	0,181637374	down	R1	TIP	wet	125	0,496	chr08	16983803	MITE/Stow	chr08	16982279	16985259	+	Similar to Endothelial differentiation-related factor 1 (EDF-1) (Multiprotein bridging factor 1) (MBF1). (Os08t0366100-01)
indica	TIP_66265	Os10g0528300	OS10T0528300-01	0,000121514	-0,702889135	0,180995285	down	R1	TIP	wet	126	0,912698413	chr10	20554824	DNAnona/hAT	chr10	20556396	20557613	+	Tau class glutathione S-transferase 4 (Os10t0528300-01)
indica	TIP_169	Os01g0116900	OS01T0116900-00	0,000135141	0,56682842	0,179529012	up	R1	TIP	wet	123	0,146341463	chr01	937226	MITE/Tourist	chr01	924451	956639	+	Protein kinase, catalytic domain domain containing protein. (Os01t0116900-00)
indica	TIP_1416	Os01g0214400	OS01T0214400-01	0,000156135	-0,504706886	0,17757296	down	R1	TIP	wet	126	0,285714286	chr01	6253685	MITE/Stow	chr01	6253793	6256906	+	Similar to predicted protein. (Os01t0214400-01)
indica	TIP_41204	Os06g0211300	OS06T0211300-01	0,00016039	0,424102629	0,177122574	up	R1	TIP	wet	119	0,571428571	chr06	5691350	DNAauto/POLE	chr06	5688697	5690594	+	Short-chain dehydrogenase/reductase SDR domain containing protein. (Os06t0211300-01)
indica	TIP_60938	Os09g0451400	OS09T0451400-01	0,000167542	-0,443933736	0,176457924	down	R1	TIP	wet	126	0,531746032	chr09	16925727	DNAnona/Helitron	chr09	16925457	16927046	+	ACC oxidase, Ethylene biosynthesis (Os09t0451400-01)
indica	TIP_41603	Os06g0239200	OS06T0239200-00	0,000191264	0,432228137	0,174652515	up	R1	TIP	wet	126	0,444444444	chr06	7230724	DNAnona/MULE	chr06	7230221	7230662	+	Conserved hypothetical protein. (Os06t0239200-00)
indica	TIP_27028	Os03g0845000	OS03T0845000-01	0,000201892	0,47378103	0,173853455	up	R1	TIP	wet	126	0,150793651	chr03	35523315	LTR/TRIM	chr03	35524251	35526214	-	Similar to Pirin-like protein. (Os03t0845000-01)
indica	TIP_60	Os01g0105900	OS01T0105900-01	0,000203367	-0,506146136	0,173657224	down	R1	TIP	wet	126	0,166666667	chr01	305239	DNAauto/MLE	chr01	309520	313170	-	PfkB carbohydrate kinase protein, Regulation of plant height and leaf structure (Os01t0105900-01)
indica	TIP_73356	Os12g0288400	OS12T0288400-01	0,000237003	-0,533960404	0,171583014	down	R1	TIP	wet	126	0,841269841	chr12	11050321	LTR/Copia	chr12	11045896	11057114	-	Similar to Ubiquitin ligase protein mib (EC 6.3.2.-) (Mind bomb protein). (Os12t0288400-01)
indica	TIP_65	Os01g0105900	OS01T0105900-01	0,00024623	0,469339678	0,170989063	up	R1	TIP	wet	126	0,801587302	chr01	317978	MITE/Stow	chr01	309520	313170	-	PfkB carbohydrate kinase protein, Regulation of plant height and leaf structure (Os01t0105900-01)
indica	TIP_68632	Os11g0262600	OS11T0262600-00	0,00027539	-0,507572448	0,16944293	down	R1	TIP	wet	126	0,341269841	chr11	8862645	MITE/Stow	chr11	8864479	8866289	-	Conserved hypothetical protein. (Os11t0262600-00)
indica	TIP_55649	Os08g0406400	OS08T0406400-01	0,000283965	-0,466529262	0,168927058	down	R1	TIP	wet	126	0,222222222	chr08	19432680	SINE/unknown	chr08	19430807	19432690	+	Similar to Sulfate transporter (Fragment). (Os08t0406400-01)
indica	TIP_44232	Os06g0564500	OS06T0564500-01	0,000283965	-0,731486757	0,168847569	down	R1	TIP	wet	123	0,918699187	chr06	21705452	DNAnona/Tourist	chr06	21700599	21703282	-	Cysteine synthase (EC 4.2.99.8). (Os06t0564500-01)
indica	TIP_66265	Os10g0528150	OS10T0528150-01	0,000289806	-0,367924733	0,168485824	down	R1	TIP	wet	126	0,912698413	chr10	20554824	DNAnona/hAT	chr10	20553611	20554584	-	Hypothetical protein. (Os10t0528150-01)
indica	TIP_67873	Os11g0184900	OS11T0184900-02	0,00029575	-0,489926295	0,168125427	down	R1	TIP	wet	126	0,555555556	chr11	4305229	DNAnona/MULE	chr11	4299277	4301784	-	Similar to OsNAC5 protein [imported]-rice. (Os11t0184900-01);NAC-type transcription factor, Regulation of stress-inducible genes, Stress tolerance (Os11t0184900-02)
indica	TIP_50989	Os07g0573800	OS07T0573800-02	0,000308907	0,458001187	0,167464964	up	R1	TIP	wet	126	0,587301587	chr07	23199139	DNAnona/MULEtir	chr07	23194229	23199780	-	Similar to root border cell-specific protein. (Os07t0573800-01);FMN-binding split barrel domain containing protein. (Os07t0573800-02);FMN-binding split barrel domain containing protein. (Os07t0573800-03);Hypothetical protein. (Os07t0573800-04)
indica	TIP_1781	Os01g0235100	OS01T0235100-01	0,000321678	0,277731771	0,166810532	up	R1	TIP	wet	123	0,699186992	chr01	7457221	DNAnona/MULE	chr01	7457835	7459834	+	Similar to predicted protein. (Os01t0235100-01)
indica	TIP_26968	Os03g0838900	OS03T0838900-01	0,000321678	0,238304902	0,166748237	up	R1	TIP	wet	126	0,587301587	chr03	35250656	MITE/Stow	chr03	35252892	35255136	-	Mitochodrial transcription termination factor-related domain containing protein. (Os03t0838900-01)
indica	TIP_40857	Os06g0185100	OS06T0185100-00	0,000342368	-0,613494957	0,165845057	down	R1	TIP	wet	126	0,206349206	chr06	4280922	DNAnona/hAT	chr06	4276289	4277154	+	Similar to estradiol 17-beta-dehydrogenase 8. (Os06t0185100-00)
indica	TIP_543	Os01g0152900	OS01T0152900-00	0,00035116	0,410438159	0,165363415	up	R1	TIP	wet	126	0,682539683	chr01	2839521	LINE/unknown	chr01	2844503	2845212	-	Similar to Histone H2B.1. (Os01t0152900-00)
indica	TIP_40855	Os06g0184800	OS06T0184800-01	0,00035116	-0,452270601	0,16532808	down	R1	TIP	wet	126	0,785714286	chr06	4260021	MITE/Stow	chr06	4264424	4265115	-	Similar to Low-temperature induced protein lt101.1 (Blt101) (Blt101.1). (Os06t0184800-01)
indica	TIP_59620	Os09g0361300	OS09T0361300-01	0,000396502	-0,51683503	0,16365782	down	R1	TIP	wet	126	0,80952381	chr09	11800598	DNAnona/hAT	chr09	11799226	11800571	-	F-box domain, cyclin-like domain containing protein. (Os09t0361300-01)
indica	TIP_3344	Os01g0348900	OS01T0348900-01	0,000413257	0,546750562	0,163027171	up	R1	TIP	wet	121	0,438016529	chr01	13902045	DNAnona/Helitron	chr01	13903285	13904626	-	Jacalin-related mannose-binding lectin, Salinity tolerance, Resistance to M. oryzae (Os01t0348900-01)
indica	TIP_50499	Os07g0534000	OS07T0534000-01	0,000454059	0,539114454	0,161709896	up	R1	TIP	wet	126	0,166666667	chr07	20934176	DNAnona/MULE	chr07	20936091	20941652	+	Similar to permeases of the major facilitator superfamily. (Os07t0534000-01)
indica	TIP_58637	Os09g0256100	OS09T0256100-00	0,000489194	0,348279415	0,160647472	up	R1	TIP	wet	125	0,52	chr09	4250407	LTR/TRIM	chr09	4250749	4251832	+	Similar to flavonol 4-sulfotransferase. (Os09t0256100-00)
indica	TIP_32930	Os04g0655300	OS04T0655300-01	0,000491218	-0,587512292	0,160502829	down	R1	TIP	wet	125	0,712	chr04	33418334	LINE/unknown	chr04	33418637	33421199	+	Response to drought in tolerant rice genotype Nagina 22, Response to submergence in japonica cultivar Taikeng 9, Response to Xanthomonas oryzae pv. oryzae in resistant rice genotype IRBB21 (Os04t0655300-01)
indica	TIP_24698	Os03g0673700	OS03T0673700-01	0,000598865	0,523283539	0,157826198	up	R1	TIP	wet	115	0,252173913	chr03	26622142	DNAnona/CACTA	chr03	26622941	26623429	+	Similar to predicted protein. (Os03t0673700-01)
indica	TIP_41602	Os06g0239200	OS06T0239200-00	0,000611979	-0,419810925	0,157453236	down	R1	TIP	wet	119	0,512605042	chr06	7227395	DNAnona/MULEtir	chr06	7230221	7230662	+	Conserved hypothetical protein. (Os06t0239200-00)
indica	TIP_41251	Os06g0216200	OS06T0216200-00	0,000613729	-0,327163732	0,157326653	down	R1	TIP	wet	126	0,468253968	chr06	5909701	LTR/Gypsy	chr06	5913057	5914285	-	Similar to Oxo-phytodienoic acid reductase. (Os06t0216200-00)
indica	TIP_72762	Os12g0228800	OS12T0228800-01	0,00062829	0,260004992	0,156931366	up	R1	TIP	wet	126	0,063492063	chr12	7011790	MITE/Stow	chr12	7014180	7014828	-	Similar to Calmodulin-like protein. (Os12t0228800-01)
indica	TIP_19995	Os03g0228500	OS03T0228500-01	0,000634305	0,407504516	0,156718645	up	R1	TIP	wet	126	0,452380952	chr03	6790149	DNAauto/MULE	chr03	6786712	6790137	+	Conserved hypothetical protein. (Os03t0228500-01)
indica	TIP_4335	Os01g0534700	OS01T0534700-00	0,00066269	-0,519574388	0,156058265	down	R1	TIP	wet	124	0,943548387	chr01	19378399	MITE/Stow	chr01	19381153	19387198	+	ABC transporter, transmembrane domain domain containing protein. (Os01t0534700-00)
indica	TIP_54005	Os08g0237200	OS08T0237200-01	0,000675037	1,032624349	0,155729593	up	R1	TIP	wet	119	0,042016807	chr08	8350007	LTR/Gypsy	chr08	8342253	8346555	-	Mannose-1-phosphate guanyl transferase, GDP-mannose pyrophosphorylase (GMPase) homolog (Os08t0237200-01)
indica	TIP_57419	Os08g0528200	OS08T0528200-01	0,000689393	-0,527288354	0,155367568	down	R1	TIP	wet	118	0,957627119	chr08	26299834	DNAnona/MULE	chr08	26301111	26301879	+	Conserved hypothetical protein. (Os08t0528200-01)
indica	TIP_52066	Os07g0663600	OS07T0663600-01	0,000733208	-0,298623564	0,154474249	down	R1	TIP	wet	126	0,484126984	chr07	27996655	LTR/Gypsy	chr07	27995955	27997226	+	Short-chain dehydrogenase/reductase SDR domain containing protein. (Os07t0663600-01)
indica	TIP_41184	Os06g0210200	OS06T0210200-01	0,00079476	-0,485111396	0,153246648	down	R1	TIP	wet	126	0,880952381	chr06	5621083	MITE/Tourist	chr06	5621964	5625687	+	Peptidase M20 domain containing protein. (Os06t0210200-01)
indica	TIP_41185	Os06g0210200	OS06T0210200-01	0,00079476	0,485111396	0,153246648	up	R1	TIP	wet	126	0,119047619	chr06	5626139	DNAnona/MULE	chr06	5621964	5625687	+	Peptidase M20 domain containing protein. (Os06t0210200-01)
indica	TIP_1562	Os01g0223700	OS01T0223700-01	0,000819	0,356671593	0,152767883	up	R1	TIP	wet	126	0,523809524	chr01	6771804	MITE/Tourist	chr01	6774202	6776856	-	S-Domain receptor like kinase-68, Partial S-domain containing protein, Response to drought in tolerant rice genotypes (Os01t0223700-01)
indica	TIP_74525	Os12g0527301	OS12T0527301-00	0,000849002	0,330081684	0,152211508	up	R1	TIP	wet	126	0,515873016	chr12	20783714	DNAauto/MULE	chr12	20781339	20781923	+	Hypothetical gene. (Os12t0527301-00)
indica	TIP_70541	Os11g0550900	OS11T0550900-01	0,000885839	0,540721469	0,151570023	up	R1	TIP	wet	122	0,860655738	chr11	20483509	MITE/Tourist	chr11	20482685	20488052	-	Conserved hypothetical protein. (Os11t0550900-01)
indica	TIP_18916	Os03g0149200	OS03T0149200-01	0,000916056	0,397348914	0,151046148	up	R1	TIP	wet	126	0,166666667	chr03	2739049	MITE/Tourist	chr03	2739653	2743118	-	HR-like lesion-inducer family protein. (Os03t0149200-01)
indica	TIP_27545	Os04g0161100	OS04T0161100-00	0,000997243	-0,969326886	0,149846503	down	R1	TIP	wet	117	0,068376068	chr04	4217484	LTR/Copia	chr04	4216591	4218547	+	Similar to OSIGBa0102O13.5 protein. (Os04t0161100-00)
indica	TIP_37375	Os05g0404400	OS05T0404400-02	0,001011363	0,362281672	0,14956341	up	R1	TIP	wet	126	0,579365079	chr05	19693132	MITE/Tourist	chr05	19691349	19694288	-	Similar to RPH1 (RESISTANCE TO PHYTOPHTHORA 1). (Os05t0404400-01);Similar to RPH1 (RESISTANCE TO PHYTOPHTHORA 1). (Os05t0404400-02)
indica	TIP_23085	Os03g0563300	OS03T0563300-01	0,001011363	-1,018061131	0,149497869	down	R1	TIP	wet	126	0,031746032	chr03	20247392	LTR/Copia	chr03	20248326	20250000	-	Magnesium-chelatase subunit ChlI, Mg-chelatase I subunit, Chlorophyll biosynthesis, Chloroplast development (Os03t0563300-01)
indica	TIP_41037	Os06g0202300	OS06T0202300-01	0,001039049	-1,294155239	0,149061159	down	R1	TIP	wet	126	0,031746032	chr06	5158333	MITE/Tourist	chr06	5158231	5165171	+	Conserved hypothetical protein. (Os06t0202300-01)
indica	TIP_59918	Os09g0382500	OS09T0382500-01	0,001040116	0,371586606	0,148967073	up	R1	TIP	wet	125	0,176	chr09	12983244	DNAnona/MULE	chr09	12977799	12980466	-	Conserved hypothetical protein. (Os09t0382500-01)
indica	TIP_53269	Os08g0158900	OS08T0158900-01	0,001168436	0,372680921	0,147353383	up	R1	TIP	wet	126	0,603174603	chr08	3440840	LTR/Gypsy	chr08	3432154	3438225	-	GTP1/OBG domain containing protein. (Os08t0158900-01)
indica	TIP_61803	Os09g0517000	OS09T0517000-01	0,001175237	0,740479891	0,147197098	up	R1	TIP	wet	126	0,841269841	chr09	20157583	MITE/Stow	chr09	20156455	20157191	+	Conserved hypothetical protein. (Os09t0517000-01)
indica	TIP_32893	Os04g0653000	OS04T0653000-01	0,001297491	-0,415983834	0,145811375	down	R1	TIP	wet	126	0,738095238	chr04	33309489	MITE/Tourist	chr04	33306468	33310169	+	Jasmonic acid (JA) signalling repressor, Regulation of spikelet development (Os04t0653000-01)
indica	TIP_41506	Os06g0232200	OS06T0232200-00	0,001317012	-0,581628503	0,145456803	down	R1	TIP	wet	126	0,142857143	chr06	6845695	MITE/Tourist	chr06	6842811	6848488	+	Similar to Fructokinase-2. (Os06t0232200-00)
indica	TIP_41510	Os06g0232200	OS06T0232200-00	0,001317012	-0,581628503	0,145456803	down	R1	TIP	wet	126	0,142857143	chr06	6851179	DNAnona/MULE	chr06	6842811	6848488	+	Similar to Fructokinase-2. (Os06t0232200-00)
indica	TIP_2028	Os01g0250900	OS01T0250900-01	0,001465181	0,312517996	0,14389905	up	R1	TIP	wet	125	0,704	chr01	8273833	DNAnona/hAT	chr01	8275474	8283959	+	HAD superfamily (subfamily IG) hydrolase, 5'-Nucleotidase protein. (Os01t0250900-01)
indica	TIP_28891	Os04g0352400	OS04T0352400-01	0,001465181	0,497011137	0,143842587	up	R1	TIP	wet	126	0,817460317	chr04	16814964	DNAnona/MULE	chr04	16813905	16817974	-	FK506-binding protein, Peptidyl-prolyl cis/trans isomerase, Chilling tolerance (Os04t0352400-01)
indica	TIP_26679	Os03g0811500	OS03T0811500-01	0,001465181	-0,377730052	0,143814435	down	R1	TIP	wet	126	0,785714286	chr03	33987228	MITE/Tourist	chr03	33988216	33991906	-	Zinc finger, HIT-type domain containing protein. (Os03t0811500-01)
indica	TIP_53268	Os08g0158900	OS08T0158900-01	0,001496839	-0,377259008	0,143454819	down	R1	TIP	wet	118	0,415254237	chr08	3432485	MITE/Tourist	chr08	3432154	3438225	-	GTP1/OBG domain containing protein. (Os08t0158900-01)
indica	TIP_58639	Os09g0256100	OS09T0256100-00	0,001507222	-0,328388851	0,143287023	down	R1	TIP	wet	126	0,46031746	chr09	4253519	MITE/Stow	chr09	4250749	4251832	+	Similar to flavonol 4-sulfotransferase. (Os09t0256100-00)
indica	TIP_52703	Os08g0112700	OS08T0112700-01	0,001730404	0,554426258	0,141343978	up	R1	TIP	wet	126	0,166666667	chr08	677789	DNAnona/hAT	chr08	679358	681703	+	MADS-box transcription factor, Regulator of both biotic and abiotic stress responses (Os08t0112700-01)
indica	TIP_68633	Os11g0262600	OS11T0262600-00	0,001730404	0,45866043	0,141306099	up	R1	TIP	wet	126	0,642857143	chr11	8863708	MITE/Tourist	chr11	8864479	8866289	-	Conserved hypothetical protein. (Os11t0262600-00)
indica	TIP_46627	Os07g0110900	OS07T0110900-01	0,001881284	0,491939787	0,140121849	up	R1	TIP	wet	108	0,638888889	chr07	606924	MITE/Tourist	chr07	607685	608602	+	Conserved hypothetical protein. (Os07t0110900-01)
indica	TIP_19567	Os03g0196600	OS03T0196600-01	0,002194109	-0,827432359	0,138003522	down	R1	TIP	wet	126	0,03968254	chr03	5063794	DNAnona/hAT	chr03	5063818	5065197	-	Serine acetyltransferase (Os03t0196600-01)
indica	TIP_56350	Os08g0452900	OS08T0452900-01	0,002203205	-0,779170333	0,137802213	down	R1	TIP	wet	126	0,071428571	chr08	22160973	LINE/unknown	chr08	22159610	22161424	+	Similar to Chaperone protein dnaJ. (Os08t0452900-01)
indica	TIP_30793	Os04g0494300	OS04T0494300-00	0,002203205	-0,629901283	0,137799933	down	R1	TIP	wet	124	0,10483871	chr04	24712398	DNAauto/MULE	chr04	24712259	24717577	+	Hypothetical gene. (Os04t0494300-00)
indica	TIP_40475	Os06g0146800	OS06T0146800-01	0,002213115	-0,222877361	0,137666568	down	R1	TIP	wet	125	0,896	chr06	2453895	MITE/Tourist	chr06	2449205	2449822	-	Conserved hypothetical protein. (Os06t0146800-01)
indica	TIP_15293	Os02g0597300	OS02T0597300-01	0,002339885	-0,194365708	0,136773699	down	R1	TIP	wet	126	0,5	chr02	23212963	DNAauto/MLE	chr02	23211709	23219912	+	Leucine-rich repeat domain containing protein. (Os02t0597300-01)
indica	TIP_15294	Os02g0597300	OS02T0597300-01	0,002339885	-0,194365708	0,136773699	down	R1	TIP	wet	126	0,5	chr02	23213038	DNAauto/MLE	chr02	23211709	23219912	+	Leucine-rich repeat domain containing protein. (Os02t0597300-01)
indica	TIP_18146	Os02g0821900	OS02T0821900-01	0,002339885	0,395636516	0,136682584	up	R1	TIP	wet	126	0,277777778	chr02	35270505	DNAnona/MULE	chr02	35275236	35278555	+	Conserved hypothetical protein. (Os02t0821900-01)
indica	TIP_32480	Os04g0615000	OS04T0615000-01	0,002339885	-0,602489687	0,136634588	down	R1	TIP	wet	126	0,095238095	chr04	31211825	LTR/Copia	chr04	31205267	31214632	+	Control of lateral leaf growth, panicle number (Os04t0615000-01)
indica	TIP_32657	Os04g0630300	OS04T0630300-01	0,002368659	0,540712818	0,136322811	up	R1	TIP	wet	126	0,738095238	chr04	32061496	MITE/Tourist	chr04	32059560	32062390	+	NAD(P)-binding domain containing protein. (Os04t0630300-01)
indica	TIP_30311	Os04g0456700	OS04T0456700-01	0,002368659	0,583259481	0,136316413	up	R1	TIP	wet	110	0,854545455	chr04	22831379	DNAauto/MLE	chr04	22829317	22830301	+	Similar to TMV induced protein 1-2. (Os04t0456700-01)
indica	TIP_63931	Os10g0343100	OS10T0343100-01	0,002368659	-0,338225204	0,136257713	down	R1	TIP	wet	126	0,333333333	chr10	10174319	MITE/Tourist	chr10	10170579	10174444	+	Syntaxin 6, N-terminal domain containing protein. (Os10t0343100-01)
indica	TIP_23286	Os03g0575700	OS03T0575700-01	0,002402168	0,185135143	0,136	up	R1	TIP	wet	126	0,055555556	chr03	21041342	MITE/Stow	chr03	21037379	21038297	-	Conserved hypothetical protein. (Os03t0575700-01)
indica	TIP_21138	Os03g0313800	OS03T0313800-00	0,002503938	-0,502720476	0,135376959	down	R1	TIP	wet	126	0,206349206	chr03	11215019	DNAauto/POLE	chr03	11217875	11218517	-	Hypothetical conserved gene. (Os03t0313800-00)
indica	TIP_30609	Os04g0477900	OS04T0477900-01	0,002774821	0,325611444	0,133937443	up	R1	TIP	wet	110	0,563636364	chr04	23912608	DNAnona/MULEtir	chr04	23912885	23915134	+	Similar to Cysteine proteinase EP-B 1 precursor (EC 3.4.22.-). (Os04t0477900-01)
indica	TIP_70582	Os11g0555600	OS11T0555600-01	0,002955251	0,348693281	0,13302173	up	R1	TIP	wet	125	0,76	chr11	20654362	DNAnona/MULEtir	chr11	20651030	20654076	-	Protein kinase, core domain containing protein. (Os11t0555600-01)
indica	TIP_32658	Os04g0630400	OS04T0630400-01	0,002955251	0,545070674	0,132957713	up	R1	TIP	wet	126	0,253968254	chr04	32063559	DNAnona/MULE	chr04	32063756	32065731	+	NAD(P)-binding domain containing protein. (Os04t0630400-01)
indica	TIP_72680	Os12g0209700	OS12T0209700-01	0,002967284	0,412035169	0,132834462	up	R1	TIP	wet	126	0,793650794	chr12	5740382	MITE/Stow	chr12	5736998	5739519	+	Hypothetical conserved gene. (Os12t0209700-01)
indica	TIP_27404	Os04g0121100	OS04T0121100-01	0,003025014	0,673297431	0,132508507	up	R1	TIP	wet	126	0,119047619	chr04	1249238	MITE/Tourist	chr04	1248450	1260282	+	Similar to OSIGBa0115D20.4 protein. (Os04t0121100-01)
indica	TIP_14341	Os02g0532300	OS02T0532300-02	0,003177091	0,362792022	0,131784912	up	R1	TIP	wet	126	0,452380952	chr02	19595686	DNAnona/MULE	chr02	19591287	19595510	+	Hypothetical conserved gene. (Os02t0532300-01);Alpha/beta hydrolase fold-1 domain containing protein. (Os02t0532300-02)
indica	TIP_67604	Os11g0162700	OS11T0162700-02	0,003245292	0,180377649	0,131433044	up	R1	TIP	wet	125	0,272	chr11	3058100	DNAnona/Helitron	chr11	3058267	3062680	-	Hypothetical conserved gene. (Os11t0162700-01);Hypothetical conserved gene. (Os11t0162700-02)
indica	TIP_40524	Os06g0152600	OS06T0152600-01	0,003253157	0,455940204	0,131165773	up	R1	TIP	wet	126	0,746031746	chr06	2715383	MITE/Stow	chr06	2714450	2715128	-	Hypothetical gene. (Os06t0152600-01)
indica	TIP_25329	Os03g0714400	OS03T0714400-01	0,003253157	-0,437952149	0,131131971	down	R1	TIP	wet	126	0,246031746	chr03	28897513	DNAnona/MULE	chr03	28901067	28906911	+	Similar to ATP binding protein. (Os03t0714400-01)
indica	TIP_25332	Os03g0714400	OS03T0714400-01	0,003253157	0,437952149	0,131131971	up	R1	TIP	wet	126	0,753968254	chr03	28902315	MITE/Tourist	chr03	28901067	28906911	+	Similar to ATP binding protein. (Os03t0714400-01)
indica	TIP_25333	Os03g0714400	OS03T0714400-01	0,003253157	0,437952149	0,131131971	up	R1	TIP	wet	126	0,753968254	chr03	28906170	DNAnona/MULE	chr03	28901067	28906911	+	Similar to ATP binding protein. (Os03t0714400-01)
indica	TIP_51406	Os07g0605350	OS07T0605350-00	0,003297319	-0,454745954	0,130885326	down	R1	TIP	wet	116	0,232758621	chr07	24809219	MITE/Tourist	chr07	24805571	24805912	+	Similar to Protein EGG APPARATUS-1. (Os07t0605350-00)
indica	TIP_46974	Os07g0142900	OS07T0142900-01	0,003336249	-0,319335745	0,130662317	down	R1	TIP	wet	126	0,658730159	chr07	2191529	DNAnona/Helitron	chr07	2193809	2196930	+	Aldo/keto reductase family protein. (Os07t0142900-01)
indica	TIP_32658	Os04g0630300	OS04T0630300-01	0,003471813	-0,533482371	0,130063756	down	R1	TIP	wet	126	0,253968254	chr04	32063559	DNAnona/MULE	chr04	32059560	32062390	+	NAD(P)-binding domain containing protein. (Os04t0630300-01)
indica	TIP_67452	Os11g0153800	OS11T0153800-01	0,003678974	0,504635105	0,129222553	up	R1	TIP	wet	126	0,150793651	chr11	2518410	LTR/Copia	chr11	2522193	2528113	+	Similar to Ribosomal protein S25 (40S ribosomal 25S subunit). (Os11t0153800-01)
indica	TIP_47367	Os07g0173100	OS07T0173100-00	0,003696572	-0,838065463	0,129093499	down	R1	TIP	wet	126	0,031746032	chr07	3843059	DNAnona/unknown	chr07	3843577	3844443	+	HSP20-like chaperone domain containing protein. (Os07t0173100-00)
indica	TIP_27087	Os03g0850600	OS03T0850600-01	0,003962262	-0,299792866	0,128098846	down	R1	TIP	wet	112	0,696428571	chr03	35803409	MITE/Tourist	chr03	35806060	35808891	-	Similar to Integral membrane protein. (Os03t0850600-01)
indica	TIP_34189	Os05g0160300	OS05T0160300-01	0,004061244	1,142013746	0,127703554	up	R1	TIP	wet	126	0,063492063	chr05	3540995	MITE/Stow	chr05	3539620	3540966	-	Bifunctional inhibitor/plant lipid transfer protein/seed storage domain containing protein. (Os05t0160300-01)
indica	TIP_25331	Os03g0714400	OS03T0714400-01	0,004167803	-0,442028962	0,12729202	down	R1	TIP	wet	125	0,232	chr03	28900458	DNAnona/hAT	chr03	28901067	28906911	+	Similar to ATP binding protein. (Os03t0714400-01)
indica	TIP_4337	Os01g0534700	OS01T0534700-00	0,004387358	0,502999314	0,126539415	up	R1	TIP	wet	126	0,047619048	chr01	19381897	MITE/Stow	chr01	19381153	19387198	+	ABC transporter, transmembrane domain domain containing protein. (Os01t0534700-00)
indica	TIP_72683	Os12g0210200	OS12T0210200-01	0,004588672	0,467284914	0,125873606	up	R1	TIP	wet	126	0,80952381	chr12	5756511	DNAnona/MULE	chr12	5756479	5760022	+	Zeta class glutathione transferase (Os12t0210200-01)
indica	TIP_70581	Os11g0555600	OS11T0555600-01	0,004689425	0,327710605	0,125518553	up	R1	TIP	wet	126	0,738095238	chr11	20653358	DNAnona/MULEtir	chr11	20651030	20654076	-	Protein kinase, core domain containing protein. (Os11t0555600-01)
indica	TIP_24690	Os03g0673600	OS03T0673600-01	0,004989994	0,876366218	0,124620944	up	R1	TIP	wet	124	0,258064516	chr03	26613339	MITE/Stow	chr03	26617086	26618211	-	Conserved hypothetical protein. (Os03t0673600-01)
indica	TIP_61	Os01g0105900	OS01T0105900-01	0,005192422	0,40595723	0,124023615	up	R1	TIP	wet	126	0,80952381	chr01	307862	MITE/Stow	chr01	309520	313170	-	PfkB carbohydrate kinase protein, Regulation of plant height and leaf structure (Os01t0105900-01)
indica	TIP_53439	Os08g0169800	OS08T0169800-01	0,0053571	-0,339441012	0,123541191	down	R1	TIP	wet	126	0,325396825	chr08	4088344	LINE/unknown	chr08	4078669	4088877	+	HAD-superfamily hydrolase, subfamily IA, REG-2-like domain containing protein. (Os08t0169800-01)
indica	TIP_10251	Os02g0125100	OS02T0125100-01	0,005416669	-0,489163353	0,123286527	down	R1	TIP	wet	126	0,055555556	chr02	1310152	MITE/Tourist	chr02	1304905	1309799	-	Homoaconitase/3-isopropylmalate dehydratase, small/large subunit domain containing protein. (Os02t0125100-01)
indica	TIP_11565	Os02g0222100	OS02T0222100-01	0,005416669	-0,235680389	0,123267973	down	R1	TIP	wet	126	0,380952381	chr02	6810923	DNAauto/hAT	chr02	6810648	6814078	+	Similar to Cysteine synthase (EC 4.2.99.8). (Os02t0222100-01)
indica	TIP_59990	Os09g0392666	OS09T0392666-01	0,005669695	0,461658022	0,12259198	up	R1	TIP	wet	126	0,825396825	chr09	13577680	MITE/Tourist	chr09	13576635	13577704	-	Conserved hypothetical protein. (Os09t0392666-01)
indica	TIP_64574	Os10g0400500	OS10T0400500-00	0,005712059	-0,350954787	0,122415086	down	R1	TIP	wet	126	0,904761905	chr10	13521656	MITE/Stow	chr10	13524417	13525925	-	Similar to Pyridoxal-dependent decarboxylase conserved domain containing protein, expressed. (Os10t0400500-00)
indica	TIP_41572	Os06g0236266	OS06T0236266-01	0,005712059	-0,255466567	0,122368918	down	R1	TIP	wet	126	0,317460317	chr06	7092867	DNAnona/unknown	chr06	7086668	7088509	-	Conserved hypothetical protein. (Os06t0236266-01)
indica	TIP_57089	Os08g0504400	OS08T0504400-02	0,006036606	-0,239036198	0,121563963	down	R1	TIP	wet	122	0,868852459	chr08	24937904	MITE/Stow	chr08	24929625	24934781	-	Similar to uncharacterized enzyme involved in pigment biosynthesis. (Os08t0504400-01);Similar to Uncharacterized enzyme involved in pigment biosynthesis. (Os08t0504400-02)
indica	TIP_67451	Os11g0153700	OS11T0153700-01	0,006468114	0,492541982	0,12057315	up	R1	TIP	wet	126	0,880952381	chr11	2512896	DNAnona/MULE	chr11	2517481	2521841	+	Chloroplast signal recognition particle 54 kDa protein, Chloroplast development (Os11t0153700-01)
indica	TIP_70195	Os11g0518900	OS11T0518900-01	0,006762274	-0,289505858	0,119913157	down	R1	TIP	wet	126	0,301587302	chr11	18638297	LTR/Copia	chr11	18636476	18650782	+	Conserved hypothetical protein. (Os11t0518900-01);Hypothetical conserved gene. (Os11t0518900-02)
indica	TIP_72461	Os12g0189400	OS12T0189400-01	0,007677026	-0,464376431	0,118141392	down	R1	TIP	wet	126	0,880952381	chr12	4504220	SINE/unknown	chr12	4506779	4507716	+	Similar to Photosystem I reaction centre subunit N, chloroplast precursor (PSI- N). (Os12t0189400-01)
indica	TIP_40856	Os06g0184800	OS06T0184800-01	0,007860151	0,341259735	0,117757158	up	R1	TIP	wet	126	0,301587302	chr06	4265494	DNAnona/hAT	chr06	4264424	4265115	-	Similar to Low-temperature induced protein lt101.1 (Blt101) (Blt101.1). (Os06t0184800-01)
indica	TIP_52054	Os07g0662800	OS07T0662800-01	0,007860151	0,356787334	0,117652149	up	R1	TIP	wet	121	0,801652893	chr07	27948480	MITE/Stow	chr07	27950941	27957461	-	Similar to tryptophan/tyrosine permease family protein. (Os07t0662800-01)
indica	TIP_15421	Os02g0609400	OS02T0609400-02	0,007860151	-0,248979861	0,117643558	down	R1	TIP	wet	126	0,285714286	chr02	23906035	DNAnona/hAT	chr02	23909403	23913641	+	Similar to Iron-stress related protein. (Os02t0609400-01);Similar to Iron-stress related protein. (Os02t0609400-02)
indica	TIP_57065	Os08g0503200	OS08T0503200-01	0,007977634	0,302648274	0,117383868	up	R1	TIP	wet	126	0,428571429	chr08	24862097	MITE/Stow	chr08	24865941	24872043	+	PLC-like phosphodiesterase, TIM beta/alpha-barrel domain domain containing protein. (Os08t0503200-01)
indica	TIP_55217	Os08g0364900	OS08T0364900-00	0,008029597	0,444198206	0,117237085	up	R1	TIP	wet	125	0,32	chr08	16895443	MITE/Tourist	chr08	16892349	16896395	+	Similar to Pirin-like protein. (Os08t0364900-00)
indica	TIP_36155	Os05g0311500	OS05T0311500-01	0,008194592	0,300251726	0,116903491	up	R1	TIP	wet	126	0,365079365	chr05	14243509	MITE/Stow	chr05	14245044	14246369	+	Protein of unknown function DUF567 family protein. (Os05t0311500-01)
indica	TIP_73493	Os12g0406100	OS12T0406100-01	0,009251546	-0,398221802	0,115205091	down	R1	TIP	wet	126	0,158730159	chr12	12264655	DNAnona/hAT	chr12	12264732	12267518	-	Glycoside hydrolase, family 43 protein. (Os12t0406100-01)
indica	TIP_13783	Os02g0494400	OS02T0494400-01	0,00955155	0,516372758	0,114715001	up	R1	TIP	wet	126	0,111111111	chr02	17340551	MITE/Tourist	chr02	17327569	17335567	-	Ankyrin (ANK)- tetratricopeptide repeat (TPR) domain containing protein, Control of panicle architecture (Os02t0494400-01)
indica	TIP_53603	Os08g0183900	OS08T0183900-01	0,009786179	0,407358429	0,114328463	up	R1	TIP	wet	123	0,577235772	chr08	4897410	DNAnona/Helitron	chr08	4897613	4900341	-	Similar to dihydroflavonol-4-reductase. (Os08t0183900-01)
indica	TIP_306	Os01g0130200	OS01T0130200-00	0,010103881	0,377469775	0,113838111	up	R1	TIP	wet	126	0,785714286	chr01	1690418	MITE/Tourist	chr01	1685427	1685810	-	Hypothetical conserved gene. (Os01t0130200-00)
indica	TIP_44229	Os06g0564300	OS06T0564300-01	0,01015746	0,792266415	0,113708792	up	R1	TIP	wet	116	0,956896552	chr06	21691880	LINE/unknown	chr06	21695353	21698217	+	Conserved hypothetical protein. (Os06t0564300-01)
indica	TIP_32657	Os04g0630400	OS04T0630400-01	0,01038496	-0,498253082	0,113351415	down	R1	TIP	wet	126	0,738095238	chr04	32061496	MITE/Tourist	chr04	32063756	32065731	+	NAD(P)-binding domain containing protein. (Os04t0630400-01)
indica	TIP_58785	Os09g0272000	OS09T0272000-01	0,010398381	0,44924439	0,113276671	up	R1	TIP	wet	116	0,310344828	chr09	5397336	MITE/Stow	chr09	5395272	5396709	-	Heavy metal transport/detoxification protein domain containing protein. (Os09t0272000-01)
indica	TIP_13413	Os02g0467200	OS02T0467200-01	0,011009979	-0,296678073	0,112445538	down	R1	TIP	wet	116	0,939655172	chr02	15727599	MITE/Stow	chr02	15725827	15726670	-	Hypothetical protein. (Os02t0467200-01)
indica	TIP_46575	Os07g0107300	OS07T0107300-01	0,011087943	0,384202999	0,112293124	up	R1	TIP	wet	111	0,540540541	chr07	406310	MITE/Stow	chr07	404540	405497	-	Plant disease resistance response protein family protein. (Os07t0107300-01)
indica	TIP_67452	Os11g0153700	OS11T0153700-01	0,011507535	-0,429089057	0,111733169	down	R1	TIP	wet	126	0,150793651	chr11	2518410	LTR/Copia	chr11	2517481	2521841	+	Chloroplast signal recognition particle 54 kDa protein, Chloroplast development (Os11t0153700-01)
indica	TIP_10054	Os02g0106800	OS02T0106800-01	0,01174598	0,78781881	0,111398789	up	R1	TIP	wet	126	0,96031746	chr02	396078	MITE/Stow	chr02	397365	403411	+	TMPIT-like family protein. (Os02t0106800-01)
indica	TIP_10877	Os02g0175000	OS02T0175000-01	0,011898105	-0,31276928	0,111168179	down	R1	TIP	wet	126	0,325396825	chr02	4105730	MITE/Tourist	chr02	4103387	4105657	+	Ion transporter , Na+ transport (Os02t0175000-01)
indica	TIP_67871	Os11g0184900	OS11T0184900-02	0,012300615	0,593046641	0,110605368	up	R1	TIP	wet	126	0,126984127	chr11	4298264	MITE/Stow	chr11	4299277	4301784	-	Similar to OsNAC5 protein [imported]-rice. (Os11t0184900-01);NAC-type transcription factor, Regulation of stress-inducible genes, Stress tolerance (Os11t0184900-02)
indica	TIP_67875	Os11g0184900	OS11T0184900-02	0,012300615	0,593046641	0,110605368	up	R1	TIP	wet	126	0,126984127	chr11	4306497	MITE/Tourist	chr11	4299277	4301784	-	Similar to OsNAC5 protein [imported]-rice. (Os11t0184900-01);NAC-type transcription factor, Regulation of stress-inducible genes, Stress tolerance (Os11t0184900-02)
indica	TIP_25474	Os03g0723600	OS03T0723600-01	0,012368504	-0,203031372	0,110475231	down	R1	TIP	wet	126	0,531746032	chr03	29405140	MITE/Tourist	chr03	29397649	29401365	+	Conserved hypothetical protein. (Os03t0723600-01);Conserved hypothetical protein. (Os03t0723600-02)
indica	TIP_73493	Os12g0406000	OS12T0406000-01	0,012449523	-0,320219591	0,110331404	down	R1	TIP	wet	126	0,158730159	chr12	12264655	DNAnona/hAT	chr12	12258469	12262067	-	Conserved hypothetical protein. (Os12t0406000-01);Hypothetical conserved gene. (Os12t0406000-02)
indica	TIP_27935	Os04g0209200	OS04T0209200-01	0,012621813	-0,459942672	0,110089894	down	R1	TIP	wet	126	0,968253968	chr04	7310112	DNAnona/Helitron	chr04	7301574	7313221	-	C-type ABC transporter, Cadmium tolerance and accumulation (Os04t0209200-01)
indica	TIP_580	Os01g0158200	OS01T0158200-01	0,012689256	0,437206915	0,109962761	up	R1	TIP	wet	126	0,134920635	chr01	3051094	DNAnona/MULE	chr01	3054481	3057198	+	Similar to Serine carboxypeptidase II-1 precursor (EC 3.4.16.6) (CP-MII.1) (Fragment). (Os01t0158200-01)
indica	TIP_7449	Os01g0771200	OS01T0771200-01	0,013522653	-0,359613898	0,10904475	down	R1	TIP	wet	126	0,158730159	chr01	32544426	DNAnona/hAT	chr01	32543304	32545191	+	XA21 binding protein 24, ATPase, Inhibition of pattern recognition receptor (PRR) -mediated immunity (Os01t0771200-01)
indica	TIP_1959	Os01g0246400	OS01T0246400-01	0,013599886	-0,733760422	0,108913007	down	R1	TIP	wet	126	0,182539683	chr01	8063852	MITE/Tourist	chr01	8061858	8062892	+	Similar to Low molecular mass early light-inducible protein HV90, chloroplast precursor (ELIP). (Os01t0246400-01)
indica	TIP_6239	Os01g0678000	OS01T0678000-00	0,01376597	-0,202408453	0,108693978	down	R1	TIP	wet	126	0,619047619	chr01	27875560	MITE/Stow	chr01	27875639	27878341	+	Protein of unknown function DUF2921 domain containing protein. (Os01t0678000-00)
indica	TIP_44927	Os06g0623300	OS06T0623300-01	0,014196955	-0,310941948	0,108184557	down	R1	TIP	wet	126	0,325396825	chr06	25070388	LTR/Copia	chr06	25073667	25076452	-	NAD(P)-binding domain containing protein. (Os06t0623300-01)
indica	TIP_20107	Os03g0235000	OS03T0235000-01	0,014196955	-0,276598059	0,108167485	down	R1	TIP	wet	126	0,896825397	chr03	7125556	MITE/Stow	chr03	7128273	7129609	-	Similar to Peroxidase. (Os03t0235000-01)
indica	TIP_25520	Os03g0726200	OS03T0726200-01	0,01448539	-0,166568481	0,107840653	down	R1	TIP	wet	126	0,69047619	chr03	29531645	MITE/Tourist	chr03	29535973	29543273	+	Similar to Hydroxyproline-rich glycoprotein DZ-HRGP precursor. (Os03t0726200-01);Hypothetical conserved gene. (Os03t0726200-02)
indica	TIP_17078	Os02g0734900	OS02T0734900-01	0,01484457	0,572805804	0,107454438	up	R1	TIP	wet	126	0,071428571	chr02	30657200	DNAnona/MULE	chr02	30658440	30659079	+	Similar to Erwinia induced protein 2. (Os02t0734900-01)
indica	TIP_2109	Os01g0256600	OS01T0256600-01	0,015049027	0,364638599	0,107215336	up	R1	TIP	wet	126	0,753968254	chr01	8559629	DNAnona/hAT	chr01	8555289	8557146	-	Ribosomal protein L18/L5 domain containing protein. (Os01t0256600-01)
indica	TIP_10741	Os02g0166600	OS02T0166600-01	0,015390794	0,466718533	0,106857094	up	R1	TIP	wet	121	0,876033058	chr02	3580842	MITE/Stow	chr02	3580321	3581706	+	Hypothetical protein. (Os02t0166600-01)
indica	TIP_37386	Os05g0405500	OS05T0405500-01	0,016256312	-0,319722873	0,106060339	down	R1	TIP	wet	126	0,317460317	chr05	19742652	DNAnona/MULE	chr05	19742292	19744773	-	Similar to Cytochrome P450 CYP721B4. (Os05t0405500-01)
indica	TIP_27072	Os03g0849600	OS03T0849600-01	0,01687074	-0,316148203	0,105503056	down	R1	TIP	wet	126	0,420634921	chr03	35740992	MITE/Stow	chr03	35736085	35741607	-	COG complex component, COG2 family protein. (Os03t0849600-01)
indica	TIP_74641	Os12g0538600	OS12T0538600-00	0,016933304	0,355011473	0,105400266	up	R1	TIP	wet	126	0,031746032	chr12	21470659	DNAnona/Helitron	chr12	21469144	21469455	+	Thioredoxin fold domain containing protein. (Os12t0538600-00)
indica	TIP_5802	Os01g0647850	OS01T0647850-01	0,018155569	0,209557377	0,104399494	up	R1	TIP	wet	113	0,159292035	chr01	26114942	DNAnona/Helitron	chr01	26115235	26119289	-	Hypothetical conserved gene. (Os01t0647850-01)
indica	TIP_1844	Os01g0238200	OS01T0238200-01	0,018553464	0,361551589	0,104052272	up	R1	TIP	wet	126	0,682539683	chr01	7656616	DNAnona/hAT	chr01	7652967	7656516	-	Conserved hypothetical protein. (Os01t0238200-01);Conserved hypothetical protein. (Os01t0238200-02)
indica	TIP_27063	Os03g0847500	OS03T0847500-01	0,018577017	-0,305186403	0,103983125	down	R1	TIP	wet	123	0,902439024	chr03	35625292	DNAnona/hAT	chr03	35625641	35629619	+	Similar to Alternative oxidase. (Os03t0847500-01)
indica	TIP_48085	Os07g0223766	OS07T0223766-01	0,01863811	-0,282830166	0,103849146	down	R1	TIP	wet	126	0,920634921	chr07	6854148	DNAnona/Helitron	chr07	6849842	6851728	-	Hypothetical conserved gene. (Os07t0223766-01)
indica	TIP_73494	Os12g0406000	OS12T0406000-01	0,01863811	0,317226885	0,103835256	up	R1	TIP	wet	126	0,849206349	chr12	12266127	MITE/Tourist	chr12	12258469	12262067	-	Conserved hypothetical protein. (Os12t0406000-01);Hypothetical conserved gene. (Os12t0406000-02)
indica	TIP_46261	Os06g0710700	OS06T0710700-01	0,018675107	-0,44441872	0,103756959	down	R1	TIP	wet	126	0,817460317	chr06	30053499	DNAnona/Helitron	chr06	30051761	30053353	-	Similar to Benzoyl coenzyme A: benzyl alcohol benzoyl transferase (Benzoyl- CoA:benzyl alcohol/phenylethanol benzoyltransferase). (Os06t0710700-01)
indica	TIP_4827	Os01g0579900	OS01T0579900-01	0,019127524	-0,344575251	0,103379838	down	R1	TIP	wet	126	0,277777778	chr01	22439969	DNAnona/MULE	chr01	22439040	22441966	-	Esterase/lipase/thioesterase domain containing protein. (Os01t0579900-01)
indica	TIP_72743	Os12g0226700	OS12T0226700-01	0,019392528	0,541149142	0,103141482	up	R1	TIP	wet	113	0,14159292	chr12	6912098	MITE/Stow	chr12	6911276	6913929	+	Similar to Allyl alcohol dehydrogenase. (Os12t0226700-01)
indica	TIP_19536	Os03g0195450	OS03T0195450-00	0,019837244	0,505080956	0,102781833	up	R1	TIP	wet	126	0,095238095	chr03	4951149	DNAnona/Helitron	chr03	4954143	4954913	-	Similar to sulfate/bicarbonate/oxalate exchanger and transporter sat-1. (Os03t0195450-00)
indica	TIP_61959	Os09g0528700	OS09T0528700-00	0,01995311	-0,244395809	0,102651916	down	R1	TIP	wet	126	0,523809524	chr09	20696476	LTR/Copia	chr09	20691369	20693116	+	Similar to Cytochrome p450 (CYP78A9). (Os09t0528700-00)
indica	TIP_44465	Os06g0591400	OS06T0591400-01	0,019954692	-0,715566131	0,10260046	down	R1	TIP	wet	126	0,174603175	chr06	23230667	DNAnona/hAT	chr06	23232535	23233439	+	Conserved hypothetical protein. (Os06t0591400-01)
indica	TIP_71836	Os12g0139500	OS12T0139500-01	0,020118335	-0,456194209	0,102438967	down	R1	TIP	wet	126	0,968253968	chr12	1913829	DNAnona/MULE	chr12	1917885	1920583	-	DNA-directed RNA polymerase, RPB5 subunit domain containing protein. (Os12t0139500-01)
indica	TIP_61386	Os09g0482780	OS09T0482780-01	0,020323271	-0,310673245	0,102225066	down	R1	TIP	wet	122	0,901639344	chr09	18616912	DNAnona/unknown	chr09	18611431	18612411	-	FAS1 domain domain containing protein. (Os09t0482780-01)
indica	TIP_45939	Os06g0686400	OS06T0686400-02	0,020323271	0,78891558	0,102200992	up	R1	TIP	wet	126	0,96031746	chr06	28620626	DNAnona/unknown	chr06	28617447	28620310	+	Bifunctional inhibitor/plant lipid transfer protein/seed storage domain containing protein. (Os06t0686400-01);Bifunctional inhibitor/plant lipid transfer protein/seed storage domain containing protein. (Os06t0686400-02)
indica	TIP_34320	Os05g0171000	OS05T0171000-01	0,020928961	-0,506532375	0,101751014	down	R1	TIP	wet	126	0,944444444	chr05	4263913	DNAnona/PILE	chr05	4255849	4260122	-	Phospholipase D2 (EC 3.1.4.4). (Os05t0171000-01)
indica	TIP_20441	Os03g0262200	OS03T0262200-00	0,020980516	0,605380007	0,101667986	up	R1	TIP	wet	126	0,944444444	chr03	8579784	MITE/Tourist	chr03	8573083	8577492	-	Similar to predicted protein. (Os03t0262200-00)
indica	TIP_28807	Os04g0347600	OS04T0347600-01	0,021142895	0,270942925	0,10151356	up	R1	TIP	wet	125	0,592	chr04	16545259	MITE/Stow	chr04	16538582	16542602	+	Tetratricopeptide-like helical domain containing protein. (Os04t0347600-01)
indica	TIP_42813	Os06g0345200	OS06T0345200-02	0,021206236	0,317563882	0,101417496	up	R1	TIP	wet	126	0,246031746	chr06	13835074	DNAauto/MULE	chr06	13835593	13844081	+	Similar to Nicotianamine aminotransferase. (Os06t0345200-01);Similar to Nicotianamine aminotransferase. (Os06t0345200-02)
indica	TIP_18083	Os02g0816600	OS02T0816600-01	0,021206236	-0,410899175	0,101374676	down	R1	TIP	wet	125	0,832	chr02	35002231	MITE/Tourist	chr02	35004914	35006549	-	Similar to ABC(yeast) homolog1. (Os02t0816600-01);Similar to ABC1 family protein. (Os02t0816600-02)
indica	TIP_43100	Os06g0476200	OS06T0476200-01	0,022111358	0,384357212	0,100755869	up	R1	TIP	wet	126	0,507936508	chr06	16010351	LTR/Copia	chr06	16011333	16032779	+	Similar to Phosphoglucomutase precursor (EC 5.4.2.2). (Os06t0476200-01);Similar to predicted protein. (Os06t0476200-02)
indica	TIP_15928	Os02g0649800	OS02T0649800-01	0,022403876	-0,288135412	0,100527961	down	R1	TIP	wet	125	0,6	chr02	26164769	SINE/unknown	chr02	26163137	26164221	-	Similar to Cytochrome B5 homolog (Fragment). (Os02t0649800-01)
indica	TIP_34342	Os05g0173500	OS05T0173500-01	0,023450568	-0,218186695	0,099856494	down	R1	TIP	wet	126	0,484126984	chr05	4402142	DNAauto/hAT	chr05	4401883	4408271	+	Conserved hypothetical protein. (Os05t0173500-01);Hypothetical conserved gene. (Os05t0173500-02);Hypothetical conserved gene. (Os05t0173500-03)
indica	TIP_32461	Os04g0614000	OS04T0614000-01	0,024498787	0,491389857	0,099211341	up	R1	TIP	wet	126	0,055555556	chr04	31141562	LTR/Copia	chr04	31139226	31141511	+	Similar to Peroxisomal 2,4-dienoyl-CoA reductase (EC 1.3.1.34). (Os04t0614000-01)
indica	TIP_16797	Os02g0712500	OS02T0712500-01	0,024957586	-0,292482603	0,098884943	down	R1	TIP	wet	126	0,833333333	chr02	29508997	MITE/Stow	chr02	29502677	29506587	-	Protein of unknown function DUF23 family protein. (Os02t0712500-01)
indica	TIP_64159	Os10g0365800	OS10T0365800-01	0,024957586	-0,219334775	0,098861898	down	R1	TIP	wet	126	0,626984127	chr10	11414519	DNAnona/hAT	chr10	11414311	11417030	+	Protein of unknown function DUF3615 domain containing protein. (Os10t0365800-01)
indica	TIP_3589	Os01g0369900	OS01T0369900-01	0,027470857	-0,773460926	0,097503633	down	R1	TIP	wet	126	0,047619048	chr01	15187367	DNAnona/hAT	chr01	15185168	15188301	-	Similar to 12-oxo-phytodienoic acid reductase6. (Os01t0369900-01)
indica	TIP_44242	Os06g0564700	OS06T0564700-01	0,027707177	-0,319563999	0,097338913	down	R1	TIP	wet	126	0,904761905	chr06	21729691	MITE/Stow	chr06	21730402	21733637	-	Similar to Cysteine synthase (EC 4.2.99.8). (Os06t0564700-01)
indica	TIP_49661	Os07g0469100	OS07T0469100-02	0,02907244	-0,192017374	0,096634081	down	R1	TIP	wet	126	0,325396825	chr07	16745408	DNAnona/MULE	chr07	16743570	16745394	+	Similar to Thylakoid membrane phosphoprotein 14 kDa, chloroplast precursor. (Os07t0469100-01);Similar to Thylakoid membrane phosphoprotein 14 kDa, chloroplast precursor. (Os07t0469100-02)
indica	TIP_70451	Os11g0539800	OS11T0539800-01	0,029666848	-0,306502599	0,096310052	down	R1	TIP	wet	126	0,785714286	chr11	19710381	MITE/Stow	chr11	19709715	19716079	-	Similar to Xaa-Pro aminopeptidase 1. (Os11t0539800-01)
indica	TIP_73494	Os12g0406100	OS12T0406100-01	0,02989973	0,371515123	0,09615594	up	R1	TIP	wet	126	0,849206349	chr12	12266127	MITE/Tourist	chr12	12264732	12267518	-	Glycoside hydrolase, family 43 protein. (Os12t0406100-01)
indica	TIP_73631	Os12g0421000	OS12T0421000-01	0,030732807	0,248522877	0,095733149	up	R1	TIP	wet	126	0,531746032	chr12	13173986	MITE/Stow	chr12	13177329	13178929	+	Similar to Barley stem rust resistance protein. (Os12t0421000-01)
indica	TIP_35157	Os05g0227600	OS05T0227600-00	0,031733145	-1,44665541	0,095248215	down	R1	TIP	wet	125	0,968	chr05	7745312	SINE/unknown	chr05	7746542	7748227	-	Proline-rich glycoprotein, ABA-dependent inhibition of root growth (Os05t0227600-01)
indica	TIP_30696	Os04g0487000	OS04T0487000-01	0,031957004	0,113934194	0,095105313	up	R1	TIP	wet	126	0,30952381	chr04	24339378	MITE/Tourist	chr04	24331929	24334820	-	Conserved hypothetical protein. (Os04t0487000-01);Conserved hypothetical protein. (Os04t0487000-02)
indica	TIP_54140	Os08g0250200	OS08T0250200-01	0,032375656	-0,243543378	0,094880685	down	R1	TIP	wet	126	0,579365079	chr08	9179147	MITE/Stow	chr08	9177347	9180467	-	ATPase, F1 complex, epsilon subunit, mitochondrial family protein. (Os08t0250200-01)
indica	TIP_27073	Os03g0849600	OS03T0849600-01	0,032973888	0,300156911	0,094583773	up	R1	TIP	wet	126	0,587301587	chr03	35744542	MITE/Tourist	chr03	35736085	35741607	-	COG complex component, COG2 family protein. (Os03t0849600-01)
indica	TIP_58641	Os09g0256700	OS09T0256700-01	0,033649701	0,351944641	0,094259903	up	R1	TIP	wet	121	0,578512397	chr09	4277788	MITE/Tourist	chr09	4277193	4277778	-	Conserved hypothetical protein. (Os09t0256700-01)
indica	TIP_25335	Os03g0714400	OS03T0714400-01	0,035438714	0,372873613	0,093504878	up	R1	TIP	wet	120	0,741666667	chr03	28908780	DNAnona/MULE	chr03	28901067	28906911	+	Similar to ATP binding protein. (Os03t0714400-01)
indica	TIP_15109	Os02g0584800	OS02T0584800-01	0,035775423	0,618916824	0,093329439	up	R1	TIP	wet	126	0,888888889	chr02	22556362	MITE/Tourist	chr02	22553380	22554242	-	Heavy metal transport/detoxification protein domain containing protein. (Os02t0584800-01)
indica	TIP_68631	Os11g0262600	OS11T0262600-00	0,036456825	-0,391529312	0,093025309	down	R1	TIP	wet	126	0,293650794	chr11	8861828	DNAnona/CACTA	chr11	8864479	8866289	-	Conserved hypothetical protein. (Os11t0262600-00)
indica	TIP_41645	Os06g0244000	OS06T0244000-01	0,037235711	0,223098599	0,092690185	up	R1	TIP	wet	126	0,396825397	chr06	7476448	DNAnona/MULE	chr06	7480272	7482194	-	Similar to anthranilic acid methyltransferase 3. (Os06t0244000-01)
indica	TIP_26104	Os03g0765800	OS03T0765800-00	0,037411233	-0,425384995	0,092580233	down	R1	TIP	wet	123	0,886178862	chr03	31714592	MITE/Stow	chr03	31718262	31721710	+	Pyridoxal phosphate-dependent transferase, major region domain containing protein. (Os03t0765800-00)
indica	TIP_30892	Os04g0503100	OS04T0503100-01	0,037548911	0,232364278	0,092443017	up	R1	TIP	wet	126	0,174603175	chr04	25124485	LTR/TRIM	chr04	25118238	25120545	-	Conserved hypothetical protein. (Os04t0503100-01)
indica	TIP_40362	Os06g0136300	OS06T0136300-01	0,037548911	0,520996457	0,092420086	up	R1	TIP	wet	121	0,082644628	chr06	1923164	MITE/Tourist	chr06	1922429	1923593	+	Similar to OSIGBa0142C11.2 protein. (Os06t0136300-01)
indica	TIP_16655	Os02g0701600	OS02T0701600-01	0,037548911	0,374950905	0,09239414	up	R1	TIP	wet	126	0,150793651	chr02	28894612	MITE/Tourist	chr02	28894065	28897418	+	Similar to Tocopherol O-methyltransferase, chloroplast precursor (EC 2.1.1.95) (Gamma-tocopherol methyltransferase). (Os02t0701600-01)
indica	TIP_71080	Os11g0630300	OS11T0630300-01	0,038095908	0,236743619	0,092151121	up	R1	TIP	wet	126	0,293650794	chr11	24715475	MITE/Stow	chr11	24716906	24719902	+	Conserved hypothetical protein. (Os11t0630300-01)
indica	TIP_61155	Os09g0467100	OS09T0467100-01	0,038525149	0,663107684	0,091952849	up	R1	TIP	wet	126	0,952380952	chr09	17751453	DNAnona/MULE	chr09	17742622	17746476	+	ATP-grasp fold, subdomain 2 domain containing protein. (Os09t0467100-01)
indica	TIP_15165	Os02g0589400	OS02T0589400-01	0,039625768	-0,680049547	0,091522346	down	R1	TIP	wet	126	0,888888889	chr02	22743430	MITE/Stow	chr02	22741593	22743361	-	UDP-glucuronosyl/UDP-glucosyltransferase family protein. (Os02t0589400-01)
indica	TIP_382	Os01g0136400	OS01T0136400-01	0,039848732	-0,341649981	0,091400939	down	R1	TIP	wet	126	0,206349206	chr01	1968001	MITE/Tourist	chr01	1957847	1967451	-	Protein kinase, core domain containing protein. (Os01t0136400-01)
indica	TIP_33521	Os05g0105000	OS05T0105000-01	0,040962646	-0,344402886	0,09097245	down	R1	TIP	wet	126	0,119047619	chr05	276090	SINE/unknown	chr05	267986	274638	-	Similar to Methionine S-methyltransferase (EC 2.1.1.12) (AdoMet:Met S- methyltransferase) (Hv-MMT1). (Os05t0105000-01)
indica	TIP_41083	Os06g0205100	OS06T0205100-01	0,040962646	0,344079112	0,090934562	up	R1	TIP	wet	126	0,222222222	chr06	5319564	MITE/Tourist	chr06	5315163	5316875	+	Similar to Transcriptional activator. (Os06t0205100-01);R2R3-Myb factor, Homolog of maize C1, Determinant of anthocyanin biosynthesis in rice leaves, Apiculus and leaf sheath colour (Os06t0205100-02)
indica	TIP_30671	Os04g0484800	OS04T0484800-01	0,042216877	0,261394636	0,090477179	up	R1	TIP	wet	126	0,293650794	chr04	24224525	LTR/Gypsy	chr04	24229248	24236905	+	Cullin family protein. (Os04t0484800-01)
indica	TIP_4829	Os01g0580000	OS01T0580000-02	0,043499197	0,302007549	0,090023107	up	R1	TIP	wet	126	0,650793651	chr01	22448510	DNAnona/MULE	chr01	22446210	22449819	-	Esterase/lipase/thioesterase domain containing protein. (Os01t0580000-01);Similar to esterase. (Os01t0580000-02)
indica	TIP_67033	Os11g0107500	OS11T0107500-01	0,043686771	0,638015206	0,089920272	up	R1	TIP	wet	126	0,031746032	chr11	349450	LTR/Copia	chr11	352295	355319	+	Tautomerase domain containing protein. (Os11t0107500-01)
indica	TIP_30263	Os04g0452000	OS04T0452000-01	0,044284861	0,447245543	0,089690169	up	R1	TIP	wet	126	0,888888889	chr04	22530674	MITE/Stow	chr04	22534358	22540942	-	Similar to H0815C01.7 protein. (Os04t0452000-01)
indica	TIP_16657	Os02g0701600	OS02T0701600-01	0,045093317	0,264264368	0,089398584	up	R1	TIP	wet	126	0,523809524	chr02	28901667	LTR/Gypsy	chr02	28894065	28897418	+	Similar to Tocopherol O-methyltransferase, chloroplast precursor (EC 2.1.1.95) (Gamma-tocopherol methyltransferase). (Os02t0701600-01)
indica	TIP_44465	Os06g0591200	OS06T0591200-01	0,045230106	0,47561272	0,089310906	up	R1	TIP	wet	126	0,174603175	chr06	23230667	DNAnona/hAT	chr06	23227138	23228388	+	Conserved hypothetical protein. (Os06t0591200-01)
indica	TIP_6440	Os01g0692000	OS01T0692000-01	0,045230106	-0,166299488	0,089270292	down	R1	TIP	wet	126	0,301587302	chr01	28566259	LTR/Gypsy	chr01	28566638	28567684	-	Similar to Glutathione S-transferase GSTU6. (Os01t0692000-01)
indica	TIP_27018	Os03g0843700	OS03T0843700-01	0,045818333	0,257250134	0,089049957	up	R1	TIP	wet	126	0,444444444	chr03	35470803	MITE/Tourist	chr03	35462177	35466386	+	FAR1 domain containing protein. (Os03t0843700-01)
indica	TIP_72681	Os12g0209700	OS12T0209700-01	0,04695535	0,323646575	0,088670795	up	R1	TIP	wet	126	0,76984127	chr12	5741710	MITE/Stow	chr12	5736998	5739519	+	Hypothetical conserved gene. (Os12t0209700-01)
indica	TIP_15111	Os02g0584800	OS02T0584800-01	0,047083777	-0,586010939	0,088552313	down	R1	TIP	wet	123	0,12195122	chr02	22558673	MITE/Stow	chr02	22553380	22554242	-	Heavy metal transport/detoxification protein domain containing protein. (Os02t0584800-01)
indica	TIP_35245	Os05g0232700	OS05T0232700-01	0,047083777	-0,137978067	0,088547635	down	R1	TIP	wet	126	0,515873016	chr05	8048287	LTR/Copia	chr05	8046789	8047587	+	Conserved hypothetical protein. (Os05t0232700-01)
indica	TIP_10621	Os02g0157600	OS02T0157600-01	0,047409654	0,48832169	0,088410393	up	R1	TIP	wet	125	0,768	chr02	3142105	DNAnona/Helitron	chr02	3142202	3144660	+	Arsenate (As(V)) reductase, Rhodanase-like protein, As(V) tolerance, Control of arsenic (As) accumulation (Os02t0157600-01);Rhodanese-like domain containing protein (Os02t0157600-02)
indica	TIP_55825	Os08g0420700	OS08T0420700-01	0,047453075	-0,320179013	0,088352547	down	R1	TIP	wet	126	0,777777778	chr08	20146912	MITE/Tourist	chr08	20144271	20145545	+	Conserved hypothetical protein. (Os08t0420700-01)
indica	TIP_1244	Os01g0203000	OS01T0203000-01	0,047453075	0,351240556	0,088276539	up	R1	TIP	wet	126	0,182539683	chr01	5668303	LTR/Copia	chr01	5669291	5671467	-	BZR1, transcriptional repressor family protein. (Os01t0203000-01)
indica	TIP_8467	Os01g0858500	OS01T0858500-01	0,047453075	-0,317146653	0,088233639	down	R1	TIP	wet	126	0,722222222	chr01	37116661	MITE/Tourist	chr01	37118464	37120942	-	Similar to Transcription initiation factor TFIID subunit 12 (Transcription initiation factor TFIID 20/15 kDa subunits) (TAFII-20/TAFII-15) (TAFII20/TAFII15). (Os01t0858500-01)
indica	TIP_25330	Os03g0714400	OS03T0714400-01	0,047453075	0,345433783	0,088228525	up	R1	TIP	wet	126	0,722222222	chr03	28899157	MITE/Tourist	chr03	28901067	28906911	+	Similar to ATP binding protein. (Os03t0714400-01)
indica	TIP_75782	Os12g0628100	OS12T0628100-01	0,049326158	-0,627294027	0,087655526	down	R1	TIP	wet	125	0,6	chr12	26894533	MITE/Tourist	chr12	26888810	26890166	-	Similar to Actin-depolymerizing factor 6 (ADF-6) (AtADF6). (Os12t0628100-01)
indica	TIP_728	Os01g0174100	OS01T0174100-01	0,049464351	0,465441774	0,087558116	up	R1	TIP	wet	126	0,904761905	chr01	3817560	MITE/Stow	chr01	3818050	3818753	-	Conserved hypothetical protein. (Os01t0174100-01)
indica	TIP_32677	Os04g0632500	OS04T0632500-00	0,049464351	0,325985101	0,087533504	up	R1	TIP	wet	125	0,808	chr04	32185049	LINE/unknown	chr04	32189416	32193189	-	S-Domain receptor like kinase-30 (Os04t0632500-00)
indica	TIP_3390	Os01g0352100	OS01T0352100-01	8,16387E-14	-1,637590109	0,456828028	down	R2	TIP	wet	126	0,73015873	chr01	14098954	LINE/unknown	chr01	14101994	14108083	+	2OG-Fe(II) oxygenase domain containing protein. (Os01t0352100-01)
indica	TIP_3391	Os01g0352100	OS01T0352100-01	2,27261E-13	-1,546126143	0,441722266	down	R2	TIP	wet	126	0,69047619	chr01	14102762	DNAnona/Helitron	chr01	14101994	14108083	+	2OG-Fe(II) oxygenase domain containing protein. (Os01t0352100-01)
indica	TIP_542	Os01g0152700	OS01T0152700-01	1,99537E-10	-0,857873452	0,373956416	down	R2	TIP	wet	126	0,285714286	chr01	2837603	SINE/unknown	chr01	2837892	2838171	-	Similar to Histone H2B (CaH2B). (Os01t0152700-01)
indica	TIP_70824	Os11g0595200	OS11T0595200-01	2,67294E-10	-1,105593895	0,368148608	down	R2	TIP	wet	126	0,603174603	chr11	22661298	DNAnona/MULE	chr11	22660534	22662341	+	PAP fibrillin family protein. (Os11t0595200-01)
indica	TIP_70825	Os11g0595200	OS11T0595200-01	1,45149E-09	-1,052688296	0,34860129	down	R2	TIP	wet	126	0,5	chr11	22662221	MITE/Tourist	chr11	22660534	22662341	+	PAP fibrillin family protein. (Os11t0595200-01)
indica	TIP_41765	Os06g0254600	OS06T0254600-01	6,85826E-09	-0,990722911	0,330390383	down	R2	TIP	wet	126	0,46031746	chr06	7995374	MITE/Tourist	chr06	7996917	8004842	-	Caleosin related family protein. (Os06t0254600-01)
indica	TIP_543	Os01g0152700	OS01T0152700-01	1,89282E-08	0,76756207	0,317844701	up	R2	TIP	wet	126	0,682539683	chr01	2839521	LINE/unknown	chr01	2837892	2838171	-	Similar to Histone H2B (CaH2B). (Os01t0152700-01)
indica	TIP_26201	Os03g0774600	OS03T0774600-01	2,39319E-08	1,085373777	0,313849472	up	R2	TIP	wet	126	0,920634921	chr03	32108992	DNAnona/MULE	chr03	32113298	32113796	+	Conserved hypothetical protein. (Os03t0774600-01)
indica	TIP_75781	Os12g0628100	OS12T0628100-01	2,4608E-08	-2,201779469	0,312262568	down	R2	TIP	wet	126	0,896825397	chr12	26892919	MITE/Tourist	chr12	26888810	26890166	-	Similar to Actin-depolymerizing factor 6 (ADF-6) (AtADF6). (Os12t0628100-01)
indica	TIP_64322	Os10g0378100	OS10T0378100-01	2,54057E-07	-0,959570354	0,285156971	down	R2	TIP	wet	126	0,214285714	chr10	12094053	DNAauto/CACTA	chr10	12090264	12098560	-	Similar to Cytochrome P450 family protein, expressed. (Os10t0378100-01)
indica	TIP_41619	Os06g0241100	OS06T0241100-01	7,52867E-07	0,42298385	0,271672108	up	R2	TIP	wet	119	0,277310924	chr06	7329511	DNAnona/MULE	chr06	7325616	7327449	-	Membrane-associated kinase-5, Response to drought stress in tolerant genotype, Response to submergence (Os06t0241100-01)
indica	TIP_49742	Os07g0475000	OS07T0475000-01	3,13224E-06	-0,748931056	0,254065522	down	R2	TIP	wet	126	0,150793651	chr07	17140585	LTR/Copia	chr07	17136166	17144612	+	Conserved hypothetical protein. (Os07t0475000-01)
indica	TIP_3392	Os01g0352100	OS01T0352100-01	4,66504E-06	-1,092034726	0,248416204	down	R2	TIP	wet	126	0,595238095	chr01	14103644	DNAnona/Helitron	chr01	14101994	14108083	+	2OG-Fe(II) oxygenase domain containing protein. (Os01t0352100-01)
indica	TIP_38559	Os05g0488000	OS05T0488000-01	7,82632E-06	-0,652337817	0,241377144	down	R2	TIP	wet	126	0,761904762	chr05	23996139	DNAnona/MULE	chr05	23996148	23997293	+	Peptidase C1A, papain family protein. (Os05t0488000-01)
indica	TIP_24692	Os03g0673600	OS03T0673600-01	8,09344E-06	-1,185307488	0,240150642	down	R2	TIP	wet	126	0,682539683	chr03	26616395	MITE/Tourist	chr03	26617086	26618211	-	Conserved hypothetical protein. (Os03t0673600-01)
indica	TIP_53604	Os08g0183900	OS08T0183900-01	8,72322E-06	-0,831786824	0,238479714	down	R2	TIP	wet	126	0,126984127	chr08	4898051	DNAnona/unknown	chr08	4897613	4900341	-	Similar to dihydroflavonol-4-reductase. (Os08t0183900-01)
indica	TIP_72732	Os12g0226400	OS12T0226400-00	9,71323E-06	0,498315829	0,236461117	up	R2	TIP	wet	126	0,365079365	chr12	6886206	DNAnona/POLE	chr12	6889996	6896735	+	Similar to 2-alkenal reductase. (Os12t0226400-00)
indica	TIP_1844	Os01g0238200	OS01T0238200-01	1,14075E-05	0,559450733	0,233837244	up	R2	TIP	wet	126	0,682539683	chr01	7656616	DNAnona/hAT	chr01	7652967	7656516	-	Conserved hypothetical protein. (Os01t0238200-01);Conserved hypothetical protein. (Os01t0238200-02)
indica	TIP_50499	Os07g0534000	OS07T0534000-01	1,35126E-05	0,695622801	0,231138952	up	R2	TIP	wet	126	0,166666667	chr07	20934176	DNAnona/MULE	chr07	20936091	20941652	+	Similar to permeases of the major facilitator superfamily. (Os07t0534000-01)
indica	TIP_58769	Os09g0270900	OS09T0270900-02	1,43834E-05	0,454021286	0,229761896	up	R2	TIP	wet	119	0,218487395	chr09	5312050	LTR/Gypsy	chr09	5306896	5309044	-	BolA-like protein domain containing protein. (Os09t0270900-01);Similar to EMB1374. (Os09t0270900-02)
indica	TIP_47761	Os07g0196200	OS07T0196200-01	1,49408E-05	-0,951423212	0,228709485	down	R2	TIP	wet	126	0,373015873	chr07	5219381	DNAauto/MULE	chr07	5216029	5217014	-	Protein of unknown function DUF3252 domain containing protein. (Os07t0196200-01)
indica	TIP_40855	Os06g0184800	OS06T0184800-01	1,58284E-05	-0,673166127	0,226901743	down	R2	TIP	wet	126	0,785714286	chr06	4260021	MITE/Stow	chr06	4264424	4265115	-	Similar to Low-temperature induced protein lt101.1 (Blt101) (Blt101.1). (Os06t0184800-01)
indica	TIP_72733	Os12g0226400	OS12T0226400-00	1,58284E-05	-0,492425675	0,226386465	down	R2	TIP	wet	126	0,650793651	chr12	6889433	LTR/Gypsy	chr12	6889996	6896735	+	Similar to 2-alkenal reductase. (Os12t0226400-00)
indica	TIP_72734	Os12g0226400	OS12T0226400-00	1,58284E-05	-0,492425675	0,226386465	down	R2	TIP	wet	126	0,650793651	chr12	6890512	LTR/Gypsy	chr12	6889996	6896735	+	Similar to 2-alkenal reductase. (Os12t0226400-00)
indica	TIP_16897	Os02g0721100	OS02T0721100-01	1,89566E-05	0,400340399	0,223692179	up	R2	TIP	wet	126	0,198412698	chr02	29918000	DNAauto/MULE	chr02	29919262	29920338	-	Similar to E2 ubiquitin-conjugating enzyme UbcH5B (Fragment). (Os02t0721100-01)
indica	TIP_24695	Os03g0673600	OS03T0673600-01	2,68167E-05	1,190485881	0,2189687	up	R2	TIP	wet	124	0,274193548	chr03	26618960	DNAnona/hAT	chr03	26617086	26618211	-	Conserved hypothetical protein. (Os03t0673600-01)
indica	TIP_40866	Os06g0185900	OS06T0185900-01	3,22825E-05	-0,91579266	0,216225955	down	R2	TIP	wet	118	0,06779661	chr06	4320286	MITE/Tourist	chr06	4321654	4325071	+	Similar to Glutathione peroxidase. (Os06t0185900-01)
indica	TIP_40867	Os06g0185900	OS06T0185900-01	4,71972E-05	-0,902769265	0,211090079	down	R2	TIP	wet	126	0,063492063	chr06	4322394	DNAnona/Helitron	chr06	4321654	4325071	+	Similar to Glutathione peroxidase. (Os06t0185900-01)
indica	TIP_9856	Os01g0965900	OS01T0965900-01	5,41557E-05	-0,525416433	0,208951203	down	R2	TIP	wet	126	0,76984127	chr01	42586676	MITE/Stow	chr01	42587307	42590270	-	Conserved hypothetical protein. (Os01t0965900-01)
indica	TIP_2027	Os01g0250900	OS01T0250900-01	5,95142E-05	-0,514300875	0,207252739	down	R2	TIP	wet	126	0,26984127	chr01	8273288	DNAnona/MULE	chr01	8275474	8283959	+	HAD superfamily (subfamily IG) hydrolase, 5'-Nucleotidase protein. (Os01t0250900-01)
indica	TIP_9857	Os01g0965900	OS01T0965900-01	5,95142E-05	-0,53610309	0,20671092	down	R2	TIP	wet	126	0,785714286	chr01	42592996	LINE/unknown	chr01	42587307	42590270	-	Conserved hypothetical protein. (Os01t0965900-01)
indica	TIP_60553	Os09g0428900	OS09T0428900-01	5,95142E-05	0,962933643	0,206556393	up	R2	TIP	wet	112	0,071428571	chr09	15587803	LINE/unknown	chr09	15583194	15586475	+	Similar to Conserved protein. (Os09t0428900-01)
indica	TIP_46627	Os07g0110800	OS07T0110800-01	7,62338E-05	0,6670165	0,20308753	up	R2	TIP	wet	108	0,638888889	chr07	606924	MITE/Tourist	chr07	604586	607425	-	Conserved hypothetical protein. (Os07t0110800-01)
indica	TIP_50500	Os07g0534000	OS07T0534000-01	8,24607E-05	0,676802371	0,201733512	up	R2	TIP	wet	126	0,150793651	chr07	20936030	DNAnona/Helitron	chr07	20936091	20941652	+	Similar to permeases of the major facilitator superfamily. (Os07t0534000-01)
indica	TIP_11170	Os02g0190300	OS02T0190300-01	9,27611E-05	-0,423168695	0,19989748	down	R2	TIP	wet	126	0,841269841	chr02	4998050	MITE/Stow	chr02	4988483	4997740	-	P-glycoprotein homologue. (Os02t0190300-01)
indica	TIP_41603	Os06g0239200	OS06T0239200-00	0,000100082	0,504892617	0,198327718	up	R2	TIP	wet	126	0,444444444	chr06	7230724	DNAnona/MULE	chr06	7230221	7230662	+	Conserved hypothetical protein. (Os06t0239200-00)
indica	TIP_39336	Os05g0546300	OS05T0546300-01	0,000100082	0,404477935	0,198248132	up	R2	TIP	wet	126	0,293650794	chr05	27121709	MITE/Tourist	chr05	27119121	27120202	+	Hypothetical protein. (Os05t0546300-01)
indica	TIP_46611	Os07g0109700	OS07T0109700-01	0,000114719	-0,86678684	0,196198088	down	R2	TIP	wet	126	0,126984127	chr07	537085	LTR/Gypsy	chr07	536836	537792	-	Conserved hypothetical protein. (Os07t0109700-01)
indica	TIP_18342	Os03g0104800	OS03T0104800-01	0,000137818	-0,135328848	0,193536	down	R2	TIP	wet	125	0,96	chr03	306573	DNAnona/Helitron	chr03	305896	308455	-	Hypothetical conserved gene. (Os03t0104800-01)
indica	TIP_5273	Os01g0611300	OS01T0611300-01	0,000137818	-0,310423044	0,193240837	down	R2	TIP	wet	126	0,642857143	chr01	24196234	DNAnona/MULE	chr01	24195504	24196616	+	Similar to Metal tolerance protein 7. (Os01t0611300-01)
indica	TIP_40181	Os06g0124900	OS06T0124900-01	0,000141796	-0,789742283	0,192384134	down	R2	TIP	wet	126	0,904761905	chr06	1343058	DNAnona/hAT	chr06	1341610	1344490	+	Conserved hypothetical protein. (Os06t0124900-01)
indica	TIP_32055	Os04g0585700	OS04T0585700-01	0,000141796	-0,628468396	0,192265613	down	R2	TIP	wet	126	0,198412698	chr04	29592939	MITE/Tourist	chr04	29588252	29590515	-	Protein of unknown function DUF581 family protein. (Os04t0585700-01)
indica	TIP_50501	Os07g0534000	OS07T0534000-01	0,00015299	0,599695266	0,190717077	up	R2	TIP	wet	126	0,19047619	chr07	20937080	MITE/Stow	chr07	20936091	20941652	+	Similar to permeases of the major facilitator superfamily. (Os07t0534000-01)
indica	TIP_50502	Os07g0534000	OS07T0534000-01	0,00015299	-0,599695266	0,190717077	down	R2	TIP	wet	126	0,80952381	chr07	20938340	MITE/Tourist	chr07	20936091	20941652	+	Similar to permeases of the major facilitator superfamily. (Os07t0534000-01)
indica	TIP_41619	Os06g0241200	OS06T0241200-01	0,00016131	0,305080934	0,189762347	up	R2	TIP	wet	119	0,277310924	chr06	7329511	DNAnona/MULE	chr06	7333167	7336677	+	Conserved hypothetical protein. (Os06t0241200-01)
indica	TIP_61206	Os09g0470500	OS09T0470500-01	0,000184451	-0,555669125	0,187784306	down	R2	TIP	wet	126	0,23015873	chr09	17909769	MITE/Tourist	chr09	17903166	17904869	+	Homeodomain-leucine zipper (HD-Zip) protein, Regulation of gibberellin signaling (Os09t0470500-01)
indica	TIP_39334	Os05g0546300	OS05T0546300-01	0,000188018	0,390108187	0,187268228	up	R2	TIP	wet	126	0,301587302	chr05	27119972	DNAauto/MULE	chr05	27119121	27120202	+	Hypothetical protein. (Os05t0546300-01)
indica	TIP_32057	Os04g0585700	OS04T0585700-01	0,000193116	-0,610243936	0,186661024	down	R2	TIP	wet	126	0,206349206	chr04	29594995	LTR/Copia	chr04	29588252	29590515	-	Protein of unknown function DUF581 family protein. (Os04t0585700-01)
indica	TIP_19871	Os03g0219200	OS03T0219200-01	0,000193905	-0,465462267	0,186347184	down	R2	TIP	wet	126	0,111111111	chr03	6275388	DNAnona/MULE	chr03	6271895	6275386	-	CuZn superoxide dismutase, Response to salinity, drought, and oxidative stress (Os03t0219200-01)
indica	TIP_58942	Os09g0287500	OS09T0287500-01	0,000247467	-0,536614492	0,182984878	down	R2	TIP	wet	125	0,688	chr09	6437899	DNAnona/Helitron	chr09	6439640	6441905	-	Protein of unknown function DUF565 family protein. (Os09t0287500-01)
indica	TIP_47231	Os07g0162500	OS07T0162500-02	0,000283382	0,614258678	0,1810021	up	R2	TIP	wet	125	0,864	chr07	3344555	DNAnona/MULE	chr07	3342219	3343596	-	Alpha/beta hydrolase fold-3 domain containing protein. (Os07t0162500-02)
indica	TIP_67392	Os11g0150800	OS11T0150800-01	0,000294748	0,373653238	0,180251163	up	R2	TIP	wet	124	0,072580645	chr11	2363757	DNAnona/MULEtir	chr11	2363882	2364482	+	Hypothetical protein. (Os11t0150800-01)
indica	TIP_27073	Os03g0849600	OS03T0849600-01	0,000301973	0,447873748	0,179553331	up	R2	TIP	wet	126	0,587301587	chr03	35744542	MITE/Tourist	chr03	35736085	35741607	-	COG complex component, COG2 family protein. (Os03t0849600-01)
indica	TIP_2107	Os01g0256500	OS01T0256500-02	0,000301973	1,22820624	0,179458519	up	R2	TIP	wet	110	0,909090909	chr01	8542846	MITE/Stow	chr01	8546065	8546869	-	Similar to ZnI. (Os01t0256500-02)
indica	TIP_66361	Os10g0536100	OS10T0536100-01	0,000376157	1,098072431	0,176299435	up	R2	TIP	wet	124	0,89516129	chr10	20863697	DNAauto/PILE	chr10	20863187	20873635	+	MIKC-type MADS-box protein, Long day (LD)-specific negative regulator of flowering (Os10t0536100-01)
indica	TIP_50987	Os07g0573800	OS07T0573800-02	0,000376157	-0,612425977	0,176176266	down	R2	TIP	wet	126	0,182539683	chr07	23194375	DNAnona/MULE	chr07	23194229	23199780	-	Similar to root border cell-specific protein. (Os07t0573800-01);FMN-binding split barrel domain containing protein. (Os07t0573800-02);FMN-binding split barrel domain containing protein. (Os07t0573800-03);Hypothetical protein. (Os07t0573800-04)
indica	TIP_27072	Os03g0849600	OS03T0849600-01	0,000520875	-0,436855394	0,17175972	down	R2	TIP	wet	126	0,420634921	chr03	35740992	MITE/Stow	chr03	35736085	35741607	-	COG complex component, COG2 family protein. (Os03t0849600-01)
indica	TIP_233	Os01g0123900	OS01T0123900-01	0,000813358	0,818293601	0,165770527	up	R2	TIP	wet	126	0,753968254	chr01	1342406	MITE/Tourist	chr01	1338241	1339098	-	Similar to Bowman-Birk type proteinase inhibitor (EBI). (Os01t0123900-01)
indica	TIP_67485	Os11g0155600	OS11T0155600-01	0,000894449	-0,563200605	0,164315013	down	R2	TIP	wet	126	0,246031746	chr11	2606655	MITE/Tourist	chr11	2605752	2614119	-	Conserved hypothetical protein. (Os11t0155600-01)
indica	TIP_75781	Os12g0628300	OS12T0628300-01	0,001348278	-0,307114463	0,158751595	down	R2	TIP	wet	126	0,896825397	chr12	26892919	MITE/Tourist	chr12	26895057	26896260	+	Conserved hypothetical protein. (Os12t0628300-01)
indica	TIP_52066	Os07g0663600	OS07T0663600-01	0,001583497	-0,340400911	0,156368345	down	R2	TIP	wet	126	0,484126984	chr07	27996655	LTR/Gypsy	chr07	27995955	27997226	+	Short-chain dehydrogenase/reductase SDR domain containing protein. (Os07t0663600-01)
indica	TIP_32053	Os04g0585700	OS04T0585700-01	0,001583497	-0,558853788	0,156220787	down	R2	TIP	wet	125	0,208	chr04	29586787	MITE/Tourist	chr04	29588252	29590515	-	Protein of unknown function DUF581 family protein. (Os04t0585700-01)
indica	TIP_75580	Os12g0615400	OS12T0615400-01	0,001730132	-0,193844953	0,154851446	down	R2	TIP	wet	126	0,293650794	chr12	26103760	MITE/Stow	chr12	26101180	26103543	-	Similar to 37 kDa inner envelope membrane protein, chloroplast precursor (E37). (Os12t0615400-01)
indica	TIP_41602	Os06g0239200	OS06T0239200-00	0,001955132	-0,453695269	0,153041502	down	R2	TIP	wet	119	0,512605042	chr06	7227395	DNAnona/MULEtir	chr06	7230221	7230662	+	Conserved hypothetical protein. (Os06t0239200-00)
indica	TIP_41506	Os06g0232200	OS06T0232200-00	0,002656136	-0,628182424	0,14860702	down	R2	TIP	wet	126	0,142857143	chr06	6845695	MITE/Tourist	chr06	6842811	6848488	+	Similar to Fructokinase-2. (Os06t0232200-00)
indica	TIP_41510	Os06g0232200	OS06T0232200-00	0,002656136	-0,628182424	0,14860702	down	R2	TIP	wet	126	0,142857143	chr06	6851179	DNAnona/MULE	chr06	6842811	6848488	+	Similar to Fructokinase-2. (Os06t0232200-00)
indica	TIP_6050	Os01g0664000	OS01T0664000-00	0,003563491	-0,298464936	0,144451921	down	R2	TIP	wet	126	0,801587302	chr01	27111166	MITE/Stow	chr01	27115631	27120123	+	Similar to carboxyl-terminal-processing protease. (Os01t0664000-00)
indica	TIP_32279	Os04g0603800	OS04T0603800-01	0,003563491	-0,388786798	0,144333338	down	R2	TIP	wet	122	0,909836066	chr04	30466929	MITE/Stow	chr04	30462591	30463339	+	Chromo domain containing protein. (Os04t0603800-01)
indica	TIP_67604	Os11g0162700	OS11T0162700-02	0,003911061	0,277888264	0,142908466	up	R2	TIP	wet	125	0,272	chr11	3058100	DNAnona/Helitron	chr11	3058267	3062680	-	Hypothetical conserved gene. (Os11t0162700-01);Hypothetical conserved gene. (Os11t0162700-02)
indica	TIP_41822	Os06g0257450	OS06T0257450-01	0,004421664	-0,421535189	0,14109163	down	R2	TIP	wet	126	0,587301587	chr06	8230373	MITE/Stow	chr06	8230555	8232480	-	Ribonucleotide reductase, Chloroplast biogenesis (Os06t0257450-01)
indica	TIP_41572	Os06g0236266	OS06T0236266-01	0,004550368	-0,313327262	0,140522848	down	R2	TIP	wet	126	0,317460317	chr06	7092867	DNAnona/unknown	chr06	7086668	7088509	-	Conserved hypothetical protein. (Os06t0236266-01)
indica	TIP_15753	Os02g0635000	OS02T0635000-01	0,004987943	0,482889588	0,139118177	up	R2	TIP	wet	126	0,301587302	chr02	25459384	DNAnona/MULE	chr02	25459520	25462586	+	Nitrilase, Regulation of root growth (Os02t0635000-01)
indica	TIP_28709	Os04g0338100	OS04T0338100-01	0,006505014	-0,421038151	0,13540169	down	R2	TIP	wet	126	0,436507937	chr04	15927749	LTR/Copia	chr04	15924375	15928109	+	Similar to IN2-2 protein. (Os04t0338100-01)
indica	TIP_41037	Os06g0202300	OS06T0202300-01	0,006920817	-1,163050304	0,134394402	down	R2	TIP	wet	126	0,031746032	chr06	5158333	MITE/Tourist	chr06	5158231	5165171	+	Conserved hypothetical protein. (Os06t0202300-01)
indica	TIP_71890	Os12g0145566	OS12T0145566-01	0,008110215	0,327736499	0,132098473	up	R2	TIP	wet	126	0,071428571	chr12	2242906	LINE/unknown	chr12	2240010	2241632	-	Similar to cDNA clone:J033057N11, full insert sequence. (Os12t0145566-01)
indica	TIP_49904	Os07g0486500	OS07T0486500-02	0,00862224	-0,332062906	0,131103261	down	R2	TIP	wet	126	0,484126984	chr07	17912109	MITE/Tourist	chr07	17907341	17912298	+	RhoGAP domain containing protein. (Os07t0486500-01);RhoGAP domain containing protein. (Os07t0486500-02)
indica	TIP_60938	Os09g0451400	OS09T0451400-01	0,009100509	-0,416252162	0,130206401	down	R2	TIP	wet	126	0,531746032	chr09	16925727	DNAnona/Helitron	chr09	16925457	16927046	+	ACC oxidase, Ethylene biosynthesis (Os09t0451400-01)
indica	TIP_15311	Os02g0600200	OS02T0600200-01	0,00991916	-0,450702535	0,128880638	down	R2	TIP	wet	126	0,174603175	chr02	23466166	MITE/Tourist	chr02	23465969	23468038	-	IQ calmodulin-binding region domain containing protein. (Os02t0600200-01);Similar to predicted protein. (Os02t0600200-02)
indica	TIP_33814	Os05g0125500	OS05T0125500-01	0,010557523	-0,547618875	0,127874331	down	R2	TIP	wet	126	0,111111111	chr05	1477355	MITE/Tourist	chr05	1470049	1473944	-	Similar to Isovaleryl-CoA dehydrogenase, mitochondrial precursor (EC 1.3.99.10) (IVD). (Os05t0125500-01)
indica	TIP_580	Os01g0158200	OS01T0158200-01	0,010999215	0,630517197	0,127156218	up	R2	TIP	wet	126	0,134920635	chr01	3051094	DNAnona/MULE	chr01	3054481	3057198	+	Similar to Serine carboxypeptidase II-1 precursor (EC 3.4.16.6) (CP-MII.1) (Fragment). (Os01t0158200-01)
indica	TIP_59781	Os09g0373000	OS09T0373000-01	0,011181208	-0,271525278	0,126609721	down	R2	TIP	wet	126	0,595238095	chr09	12448056	DNAnona/MULE	chr09	12443393	12445866	-	Similar to Brain protein 44-like protein (PNAS-115). (Os09t0373000-01)
indica	TIP_24698	Os03g0673600	OS03T0673600-01	0,011181208	0,965626227	0,1266049	up	R2	TIP	wet	115	0,252173913	chr03	26622142	DNAnona/CACTA	chr03	26617086	26618211	-	Conserved hypothetical protein. (Os03t0673600-01)
indica	TIP_23286	Os03g0575700	OS03T0575700-01	0,011374733	0,375014985	0,12621201	up	R2	TIP	wet	126	0,055555556	chr03	21041342	MITE/Stow	chr03	21037379	21038297	-	Conserved hypothetical protein. (Os03t0575700-01)
indica	TIP_36305	Os05g0320800	OS05T0320800-01	0,013450601	-0,375157129	0,123799605	down	R2	TIP	wet	126	0,841269841	chr05	14903317	MITE/Tourist	chr05	14906587	14907252	+	Hypothetical protein. (Os05t0320800-01)
indica	TIP_53796	Os08g0205150	OS08T0205150-01	0,013486012	0,346229376	0,123605147	up	R2	TIP	wet	126	0,142857143	chr08	6142909	LTR/Copia	chr08	6137622	6141504	+	CC-NBS-LRR protein, Cold stress signaling and response (Os08t0205150-01)
indica	TIP_58683	Os09g0261100	OS09T0261100-01	0,013742623	-0,512252382	0,123194391	down	R2	TIP	wet	126	0,944444444	chr09	4505213	LINE/unknown	chr09	4502977	4506761	-	Cyclin-like F-box domain containing protein. (Os09t0261100-01)
indica	TIP_29623	Os04g0405401	OS04T0405401-01	0,014923426	0,278530283	0,121929688	up	R2	TIP	wet	120	0,2	chr04	20119077	DNAnona/Helitron	chr04	20117097	20119136	-	Hypothetical conserved gene. (Os04t0405401-01)
indica	TIP_232	Os01g0123900	OS01T0123900-01	0,015622446	0,830583866	0,121159398	up	R2	TIP	wet	117	0,829059829	chr01	1341010	DNAnona/MULE	chr01	1338241	1339098	-	Similar to Bowman-Birk type proteinase inhibitor (EBI). (Os01t0123900-01)
indica	TIP_63115	Os10g0162834	OS10T0162834-01	0,016407385	-0,778223661	0,12025454	down	R2	TIP	wet	126	0,952380952	chr10	4037688	DNAnona/hAT	chr10	4034799	4038082	-	Thioredoxin-like fold domain containing protein. (Os10t0162834-01)
indica	TIP_24690	Os03g0673600	OS03T0673600-01	0,016407385	0,899228806	0,12019609	up	R2	TIP	wet	124	0,258064516	chr03	26613339	MITE/Stow	chr03	26617086	26618211	-	Conserved hypothetical protein. (Os03t0673600-01)
indica	TIP_53603	Os08g0183900	OS08T0183900-01	0,0165022	0,402452351	0,119969476	up	R2	TIP	wet	123	0,577235772	chr08	4897410	DNAnona/Helitron	chr08	4897613	4900341	-	Similar to dihydroflavonol-4-reductase. (Os08t0183900-01)
indica	TIP_34204	Os05g0161500	OS05T0161500-01	0,017071332	-0,481709623	0,119364945	down	R2	TIP	wet	126	0,349206349	chr05	3628628	DNAnona/hAT	chr05	3626394	3629080	+	Calcium-activated (p)ppGpp synthetase, Ca<sup>2+</sup>-activated RelA-SpoT homolog 2 (Os05t0161500-01)
indica	TIP_40623	Os06g0159900	OS06T0159900-01	0,021333231	0,294419847	0,116210173	up	R2	TIP	wet	126	0,238095238	chr06	3059828	MITE/Stow	chr06	3051248	3055005	+	Similar to Arm repeat containing protein. (Os06t0159900-01)
indica	TIP_12209	Os02g0272900	OS02T0272900-01	0,02298313	-0,535469641	0,11505839	down	R2	TIP	wet	126	0,944444444	chr02	9926573	DNAnona/MULE	chr02	9923292	9928340	-	NB-ARC domain containing protein. (Os02t0272900-01)
indica	TIP_14359	Os02g0533800	OS02T0533800-01	0,024256346	-0,391714045	0,114185755	down	R2	TIP	wet	125	0,592	chr02	19649688	MITE/Tourist	chr02	19648496	19649478	-	Similar to ATPase inhibitor. (Os02t0533800-01)
indica	TIP_66416	Os10g0540100	OS10T0540100-01	0,024408997	-0,341897894	0,113959129	down	R2	TIP	wet	126	0,912698413	chr10	21053818	DNAnona/hAT	chr10	21058117	21061300	-	Pentatricopeptide repeat domain containing protein. (Os10t0540100-01)
indica	TIP_48004	Os07g0212200	OS07T0212200-01	0,026789432	0,469189408	0,112558719	up	R2	TIP	wet	122	0,827868852	chr07	6141632	DNAnona/MULE	chr07	6134016	6136740	+	Similar to MRNA-binding protein (Fragment). (Os07t0212200-01)
indica	TIP_72680	Os12g0209700	OS12T0209700-01	0,027013023	0,451947388	0,112243168	up	R2	TIP	wet	126	0,793650794	chr12	5740382	MITE/Stow	chr12	5736998	5739519	+	Hypothetical conserved gene. (Os12t0209700-01)
indica	TIP_44242	Os06g0564700	OS06T0564700-01	0,027013023	-0,459317153	0,112169587	down	R2	TIP	wet	126	0,904761905	chr06	21729691	MITE/Stow	chr06	21730402	21733637	-	Similar to Cysteine synthase (EC 4.2.99.8). (Os06t0564700-01)
indica	TIP_66265	Os10g0528150	OS10T0528150-01	0,028133552	-0,436335788	0,111482501	down	R2	TIP	wet	126	0,912698413	chr10	20554824	DNAnona/hAT	chr10	20553611	20554584	-	Hypothetical protein. (Os10t0528150-01)
indica	TIP_68116	Os11g0210600	OS11T0210600-01	0,02840415	0,809228749	0,11121782	up	R2	TIP	wet	126	0,912698413	chr11	5761279	MITE/Tourist	chr11	5755644	5758642	-	Similar to Alcohol dehydrogenase (Fragment). (Os11t0210600-01)
indica	TIP_15147	Os02g0588300	OS02T0588300-01	0,028923924	-0,313551779	0,110838319	down	R2	TIP	wet	126	0,936507937	chr02	22671927	DNAnona/MULE	chr02	22666458	22671443	-	Similar to Fimbrin 1 (AtFIM1). (Os02t0588300-01)
indica	TIP_16467	Os02g0687550	OS02T0687550-00	0,029078669	-0,353328243	0,110633629	down	R2	TIP	wet	126	0,96031746	chr02	28173942	MITE/Tourist	chr02	28174101	28175352	-	Hypothetical gene. (Os02t0687550-00)
indica	TIP_27051	Os03g0846400	OS03T0846400-01	0,029581431	-0,681203325	0,1101402	down	R2	TIP	wet	126	0,126984127	chr03	35585064	DNAnona/hAT	chr03	35589787	35596069	+	Peptidase, trypsin-like serine and cysteine domain containing protein. (Os03t0846400-01)
indica	TIP_27055	Os03g0846400	OS03T0846400-01	0,029581431	-0,681203325	0,1101402	down	R2	TIP	wet	126	0,126984127	chr03	35595754	DNAauto/MULE	chr03	35589787	35596069	+	Peptidase, trypsin-like serine and cysteine domain containing protein. (Os03t0846400-01)
indica	TIP_61803	Os09g0517000	OS09T0517000-01	0,030693778	0,631170704	0,109510643	up	R2	TIP	wet	126	0,841269841	chr09	20157583	MITE/Stow	chr09	20156455	20157191	+	Conserved hypothetical protein. (Os09t0517000-01)
indica	TIP_70450	Os11g0539600	OS11T0539600-00	0,031315364	-0,222061823	0,109111024	down	R2	TIP	wet	115	0,6	chr11	19703784	MITE/Tourist	chr11	19701215	19702758	-	Conserved hypothetical protein. (Os11t0539600-00)
indica	TIP_32930	Os04g0655300	OS04T0655300-01	0,031864494	-0,475189608	0,108748689	down	R2	TIP	wet	125	0,712	chr04	33418334	LINE/unknown	chr04	33418637	33421199	+	Response to drought in tolerant rice genotype Nagina 22, Response to submergence in japonica cultivar Taikeng 9, Response to Xanthomonas oryzae pv. oryzae in resistant rice genotype IRBB21 (Os04t0655300-01)
indica	TIP_15335	Os02g0601700	OS02T0601700-01	0,033861333	0,453848234	0,107797897	up	R2	TIP	wet	126	0,047619048	chr02	23544092	MITE/Tourist	chr02	23544805	23549077	+	Ankyrin repeat containing protein. (Os02t0601700-01)
indica	TIP_51406	Os07g0605350	OS07T0605350-00	0,039438054	-0,426257588	0,105600973	down	R2	TIP	wet	116	0,232758621	chr07	24809219	MITE/Tourist	chr07	24805571	24805912	+	Similar to Protein EGG APPARATUS-1. (Os07t0605350-00)
indica	TIP_1562	Os01g0223700	OS01T0223700-01	0,039713983	0,340452825	0,105382992	up	R2	TIP	wet	126	0,523809524	chr01	6771804	MITE/Tourist	chr01	6774202	6776856	-	S-Domain receptor like kinase-68, Partial S-domain containing protein, Response to drought in tolerant rice genotypes (Os01t0223700-01)
indica	TIP_15148	Os02g0588300	OS02T0588300-01	0,039863875	-0,349934798	0,105209699	down	R2	TIP	wet	124	0,951612903	chr02	22672551	MITE/Tourist	chr02	22666458	22671443	-	Similar to Fimbrin 1 (AtFIM1). (Os02t0588300-01)
indica	TIP_15414	Os02g0608600	OS02T0608600-01	0,041115313	0,629811426	0,104668059	up	R2	TIP	wet	126	0,896825397	chr02	23882984	MITE/Stow	chr02	23886678	23890742	+	Amino acid-binding ACT domain containing protein. (Os02t0608600-01)
indica	TIP_38345	Os05g0471350	OS05T0471350-00	0,04228537	-0,252651025	0,104166118	down	R2	TIP	wet	124	0,943548387	chr05	23137367	DNAnona/Tourist	chr05	23138974	23139854	-	Similar to electron transporter. (Os05t0471350-00)
indica	TIP_50989	Os07g0573800	OS07T0573800-02	0,043852671	0,368403096	0,103551582	up	R2	TIP	wet	126	0,587301587	chr07	23199139	DNAnona/MULEtir	chr07	23194229	23199780	-	Similar to root border cell-specific protein. (Os07t0573800-01);FMN-binding split barrel domain containing protein. (Os07t0573800-02);FMN-binding split barrel domain containing protein. (Os07t0573800-03);Hypothetical protein. (Os07t0573800-04)
indica	TIP_7630	Os01g0787600	OS01T0787600-01	0,045413396	-0,477272726	0,102957257	down	R2	TIP	wet	126	0,968253968	chr01	33409424	LINE/unknown	chr01	33409655	33415562	+	Similar to Salicylic acid-binding protein 2. (Os01t0787600-01);Similar to Protein S. (Os01t0787600-02)
indica	TIP_32892	Os04g0653000	OS04T0653000-01	0,045492338	0,416965523	0,102816642	up	R2	TIP	wet	126	0,166666667	chr04	33303873	MITE/Tourist	chr04	33306468	33310169	+	Jasmonic acid (JA) signalling repressor, Regulation of spikelet development (Os04t0653000-01)
indica	TIP_74798	Os12g0552800	OS12T0552800-01	0,045550281	0,249427509	0,102683333	up	R2	TIP	wet	123	0,308943089	chr12	22466223	DNAnona/unknown	chr12	22466362	22469274	+	Conserved hypothetical protein. (Os12t0552800-01)
indica	TIP_55352	Os08g0379000	OS08T0379000-01	0,046760875	-0,404541309	0,102210864	down	R2	TIP	wet	126	0,222222222	chr08	17819158	MITE/Stow	chr08	17822367	17838135	-	RNA-processing protein, HAT helix domain containing protein. (Os08t0379000-01)
indica	TIP_75781	Os12g0628100	OS12T0628100-01	5,74999E-33	-2,853328486	0,732305948	down	R3	TIP	wet	126	0,896825397	chr12	26892919	MITE/Tourist	chr12	26888810	26890166	-	Similar to Actin-depolymerizing factor 6 (ADF-6) (AtADF6). (Os12t0628100-01)
indica	TIP_3390	Os01g0352100	OS01T0352100-01	3,05562E-27	-2,03920352	0,66541096	down	R3	TIP	wet	126	0,73015873	chr01	14098954	LINE/unknown	chr01	14101994	14108083	+	2OG-Fe(II) oxygenase domain containing protein. (Os01t0352100-01)
indica	TIP_3391	Os01g0352100	OS01T0352100-01	1,41443E-25	-1,922943426	0,641828408	down	R3	TIP	wet	126	0,69047619	chr01	14102762	DNAnona/Helitron	chr01	14101994	14108083	+	2OG-Fe(II) oxygenase domain containing protein. (Os01t0352100-01)
indica	TIP_67392	Os11g0150800	OS11T0150800-01	8,95115E-22	0,67034996	0,585898998	up	R3	TIP	wet	124	0,072580645	chr11	2363757	DNAnona/MULEtir	chr11	2363882	2364482	+	Hypothetical protein. (Os11t0150800-01)
indica	TIP_16897	Os02g0721100	OS02T0721100-01	1,28923E-21	0,689273233	0,581975151	up	R3	TIP	wet	126	0,198412698	chr02	29918000	DNAauto/MULE	chr02	29919262	29920338	-	Similar to E2 ubiquitin-conjugating enzyme UbcH5B (Fragment). (Os02t0721100-01)
indica	TIP_70824	Os11g0595200	OS11T0595200-01	2,10938E-20	-1,296192771	0,561534741	down	R3	TIP	wet	126	0,603174603	chr11	22661298	DNAnona/MULE	chr11	22660534	22662341	+	PAP fibrillin family protein. (Os11t0595200-01)
indica	TIP_70825	Os11g0595200	OS11T0595200-01	8,37101E-16	-1,171665452	0,479228008	down	R3	TIP	wet	126	0,5	chr11	22662221	MITE/Tourist	chr11	22660534	22662341	+	PAP fibrillin family protein. (Os11t0595200-01)
indica	TIP_19871	Os03g0219200	OS03T0219200-01	2,57567E-15	-1,026540865	0,468650711	down	R3	TIP	wet	126	0,111111111	chr03	6275388	DNAnona/MULE	chr03	6271895	6275386	-	CuZn superoxide dismutase, Response to salinity, drought, and oxidative stress (Os03t0219200-01)
indica	TIP_66361	Os10g0536100	OS10T0536100-01	7,86785E-14	1,920936648	0,437755324	up	R3	TIP	wet	124	0,89516129	chr10	20863697	DNAauto/PILE	chr10	20863187	20873635	+	MIKC-type MADS-box protein, Long day (LD)-specific negative regulator of flowering (Os10t0536100-01)
indica	TIP_67485	Os11g0155600	OS11T0155600-01	3,37138E-13	-1,076387825	0,423572321	down	R3	TIP	wet	126	0,246031746	chr11	2606655	MITE/Tourist	chr11	2605752	2614119	-	Conserved hypothetical protein. (Os11t0155600-01)
indica	TIP_23286	Os03g0575700	OS03T0575700-01	6,06467E-13	0,768214425	0,41726024	up	R3	TIP	wet	126	0,055555556	chr03	21041342	MITE/Stow	chr03	21037379	21038297	-	Conserved hypothetical protein. (Os03t0575700-01)
indica	TIP_24692	Os03g0673600	OS03T0673600-01	1,75023E-12	-1,305134071	0,406500985	down	R3	TIP	wet	126	0,682539683	chr03	26616395	MITE/Tourist	chr03	26617086	26618211	-	Conserved hypothetical protein. (Os03t0673600-01)
indica	TIP_49742	Os07g0475000	OS07T0475000-01	6,8847E-12	-1,018461044	0,392624886	down	R3	TIP	wet	126	0,150793651	chr07	17140585	LTR/Copia	chr07	17136166	17144612	+	Conserved hypothetical protein. (Os07t0475000-01)
indica	TIP_542	Os01g0152700	OS01T0152700-01	8,1627E-12	-0,932867721	0,390254744	down	R3	TIP	wet	126	0,285714286	chr01	2837603	SINE/unknown	chr01	2837892	2838171	-	Similar to Histone H2B (CaH2B). (Os01t0152700-01)
indica	TIP_543	Os01g0152700	OS01T0152700-01	8,20445E-12	0,904507445	0,38953437	up	R3	TIP	wet	126	0,682539683	chr01	2839521	LINE/unknown	chr01	2837892	2838171	-	Similar to Histone H2B (CaH2B). (Os01t0152700-01)
indica	TIP_41765	Os06g0254600	OS06T0254600-01	1,09775E-11	-1,04835957	0,386064501	down	R3	TIP	wet	126	0,46031746	chr06	7995374	MITE/Tourist	chr06	7996917	8004842	-	Caleosin related family protein. (Os06t0254600-01)
indica	TIP_64322	Os10g0378100	OS10T0378100-01	2,80249E-11	-1,035775004	0,376228189	down	R3	TIP	wet	126	0,214285714	chr10	12094053	DNAauto/CACTA	chr10	12090264	12098560	-	Similar to Cytochrome P450 family protein, expressed. (Os10t0378100-01)
indica	TIP_40866	Os06g0185900	OS06T0185900-01	4,10894E-11	-1,282044362	0,371844571	down	R3	TIP	wet	118	0,06779661	chr06	4320286	MITE/Tourist	chr06	4321654	4325071	+	Similar to Glutathione peroxidase. (Os06t0185900-01)
indica	TIP_40867	Os06g0185900	OS06T0185900-01	5,17091E-11	-1,273470622	0,368581883	down	R3	TIP	wet	126	0,063492063	chr06	4322394	DNAnona/Helitron	chr06	4321654	4325071	+	Similar to Glutathione peroxidase. (Os06t0185900-01)
indica	TIP_3392	Os01g0352100	OS01T0352100-01	5,17091E-11	-1,372278014	0,368483216	down	R3	TIP	wet	126	0,595238095	chr01	14103644	DNAnona/Helitron	chr01	14101994	14108083	+	2OG-Fe(II) oxygenase domain containing protein. (Os01t0352100-01)
indica	TIP_36305	Os05g0320800	OS05T0320800-01	6,36405E-10	-0,477607756	0,342248078	down	R3	TIP	wet	126	0,841269841	chr05	14903317	MITE/Tourist	chr05	14906587	14907252	+	Hypothetical protein. (Os05t0320800-01)
indica	TIP_3413	Os01g0355800	OS01T0355800-00	3,19968E-09	0,558920333	0,324657876	up	R3	TIP	wet	124	0,080645161	chr01	14322251	MITE/Stow	chr01	14326183	14327100	+	Similar to Esterase PIR7A. (Os01t0355800-00)
indica	TIP_24695	Os03g0673600	OS03T0673600-01	5,90367E-09	1,213373693	0,317579413	up	R3	TIP	wet	124	0,274193548	chr03	26618960	DNAnona/hAT	chr03	26617086	26618211	-	Conserved hypothetical protein. (Os03t0673600-01)
indica	TIP_47761	Os07g0196200	OS07T0196200-01	9,98752E-09	-1,282268747	0,311399315	down	R3	TIP	wet	126	0,373015873	chr07	5219381	DNAauto/MULE	chr07	5216029	5217014	-	Protein of unknown function DUF3252 domain containing protein. (Os07t0196200-01)
indica	TIP_72732	Os12g0226400	OS12T0226400-00	1,97249E-08	0,625570422	0,303478536	up	R3	TIP	wet	126	0,365079365	chr12	6886206	DNAnona/POLE	chr12	6889996	6896735	+	Similar to 2-alkenal reductase. (Os12t0226400-00)
indica	TIP_58942	Os09g0287500	OS09T0287500-01	2,05751E-08	-0,820593612	0,302579131	down	R3	TIP	wet	125	0,688	chr09	6437899	DNAnona/Helitron	chr09	6439640	6441905	-	Protein of unknown function DUF565 family protein. (Os09t0287500-01)
indica	TIP_46611	Os07g0109700	OS07T0109700-01	2,33058E-08	-1,085366297	0,300782355	down	R3	TIP	wet	126	0,126984127	chr07	537085	LTR/Gypsy	chr07	536836	537792	-	Conserved hypothetical protein. (Os07t0109700-01)
indica	TIP_26201	Os03g0774600	OS03T0774600-01	2,61379E-08	1,162941315	0,299106796	up	R3	TIP	wet	126	0,920634921	chr03	32108992	DNAnona/MULE	chr03	32113298	32113796	+	Conserved hypothetical protein. (Os03t0774600-01)
indica	TIP_48084	Os07g0223766	OS07T0223766-01	3,08458E-08	0,505879699	0,296874582	up	R3	TIP	wet	121	0,074380165	chr07	6849611	MITE/Tourist	chr07	6849842	6851728	-	Hypothetical conserved gene. (Os07t0223766-01)
indica	TIP_98	Os01g0108400	OS01T0108400-00	6,32442E-08	-0,487088453	0,288452475	down	R3	TIP	wet	126	0,587301587	chr01	457422	MITE/Stow	chr01	455707	457425	+	Helix-loop-helix DNA-binding domain containing protein. (Os01t0108400-00)
indica	TIP_15311	Os02g0600200	OS02T0600200-01	8,30139E-08	-0,867514839	0,285011553	down	R3	TIP	wet	126	0,174603175	chr02	23466166	MITE/Tourist	chr02	23465969	23468038	-	IQ calmodulin-binding region domain containing protein. (Os02t0600200-01);Similar to predicted protein. (Os02t0600200-02)
indica	TIP_72762	Os12g0228800	OS12T0228800-01	8,47845E-08	0,402939341	0,284413294	up	R3	TIP	wet	126	0,063492063	chr12	7011790	MITE/Stow	chr12	7014180	7014828	-	Similar to Calmodulin-like protein. (Os12t0228800-01)
indica	TIP_60553	Os09g0428900	OS09T0428900-01	8,70823E-08	0,933129678	0,283761761	up	R3	TIP	wet	112	0,071428571	chr09	15587803	LINE/unknown	chr09	15583194	15586475	+	Similar to Conserved protein. (Os09t0428900-01)
indica	TIP_72733	Os12g0226400	OS12T0226400-00	8,88129E-08	-0,609954383	0,282871368	down	R3	TIP	wet	126	0,650793651	chr12	6889433	LTR/Gypsy	chr12	6889996	6896735	+	Similar to 2-alkenal reductase. (Os12t0226400-00)
indica	TIP_72734	Os12g0226400	OS12T0226400-00	8,88129E-08	-0,609954383	0,282871368	down	R3	TIP	wet	126	0,650793651	chr12	6890512	LTR/Gypsy	chr12	6889996	6896735	+	Similar to 2-alkenal reductase. (Os12t0226400-00)
indica	TIP_40475	Os06g0146800	OS06T0146800-01	1,5387E-07	-0,273533594	0,2762879	down	R3	TIP	wet	125	0,896	chr06	2453895	MITE/Tourist	chr06	2449205	2449822	-	Conserved hypothetical protein. (Os06t0146800-01)
indica	TIP_66265	Os10g0528150	OS10T0528150-01	1,76774E-07	-0,592274823	0,274232752	down	R3	TIP	wet	126	0,912698413	chr10	20554824	DNAnona/hAT	chr10	20553611	20554584	-	Hypothetical protein. (Os10t0528150-01)
indica	TIP_56350	Os08g0452900	OS08T0452900-01	1,76774E-07	-1,194862437	0,274078056	down	R3	TIP	wet	126	0,071428571	chr08	22160973	LINE/unknown	chr08	22159610	22161424	+	Similar to Chaperone protein dnaJ. (Os08t0452900-01)
indica	TIP_51880	Os07g0643400	OS07T0643400-01	1,7875E-07	-0,634660754	0,273652306	down	R3	TIP	wet	126	0,888888889	chr07	26786932	LTR/unknown	chr07	26790870	26792040	-	Alpha/beta hydrolase fold-3 domain containing protein. (Os07t0643400-01)
indica	TIP_38559	Os05g0488000	OS05T0488000-01	2,58569E-07	-0,553772601	0,269109411	down	R3	TIP	wet	126	0,761904762	chr05	23996139	DNAnona/MULE	chr05	23996148	23997293	+	Peptidase C1A, papain family protein. (Os05t0488000-01)
indica	TIP_16476	Os02g0687900	OS02T0687900-01	3,09559E-07	-1,223058338	0,266741997	down	R3	TIP	wet	126	0,896825397	chr02	28212452	DNAnona/CACTA	chr02	28212163	28216943	+	Peptidase S10, serine carboxypeptidase family protein. (Os02t0687900-01)
indica	TIP_28709	Os04g0338100	OS04T0338100-01	3,78089E-07	-0,710594696	0,264142043	down	R3	TIP	wet	126	0,436507937	chr04	15927749	LTR/Copia	chr04	15924375	15928109	+	Similar to IN2-2 protein. (Os04t0338100-01)
indica	TIP_1416	Os01g0214400	OS01T0214400-01	5,7983E-07	-0,706320888	0,258881758	down	R3	TIP	wet	126	0,285714286	chr01	6253685	MITE/Stow	chr01	6253793	6256906	+	Similar to predicted protein. (Os01t0214400-01)
indica	TIP_63074	Os10g0159800	OS10T0159800-04	5,93412E-07	0,666389238	0,258341784	up	R3	TIP	wet	126	0,595238095	chr10	3798513	DNAnona/Helitron	chr10	3793940	3803819	-	Alcohol dehydrogenase superfamily, zinc-containing protein. (Os10t0159800-01);Similar to Alcohol dehydrogenase 2. (Os10t0159800-03);Similar to Alcohol dehydrogenase 2. (Os10t0159800-04)
indica	TIP_41619	Os06g0241100	OS06T0241100-01	6,77726E-07	0,397901476	0,256521425	up	R3	TIP	wet	119	0,277310924	chr06	7329511	DNAnona/MULE	chr06	7325616	7327449	-	Membrane-associated kinase-5, Response to drought stress in tolerant genotype, Response to submergence (Os06t0241100-01)
indica	TIP_75580	Os12g0615400	OS12T0615400-01	8,14171E-07	-0,299072369	0,254107879	down	R3	TIP	wet	126	0,293650794	chr12	26103760	MITE/Stow	chr12	26101180	26103543	-	Similar to 37 kDa inner envelope membrane protein, chloroplast precursor (E37). (Os12t0615400-01)
indica	TIP_43198	Os06g0484500	OS06T0484500-01	1,15556E-06	-0,597262747	0,249722347	down	R3	TIP	wet	126	0,492063492	chr06	16501645	MITE/Tourist	chr06	16504514	16505330	+	Conserved hypothetical protein. (Os06t0484500-01)
indica	TIP_20554	Os03g0269900	OS03T0269900-01	1,19225E-06	0,640252743	0,249103281	up	R3	TIP	wet	126	0,642857143	chr03	9020009	DNAnona/unknown	chr03	9011629	9016463	+	Protein of unknown function DUF604 family protein. (Os03t0269900-01)
indica	TIP_41603	Os06g0239200	OS06T0239200-00	1,32922E-06	0,616171397	0,247570068	up	R3	TIP	wet	126	0,444444444	chr06	7230724	DNAnona/MULE	chr06	7230221	7230662	+	Conserved hypothetical protein. (Os06t0239200-00)
indica	TIP_43197	Os06g0484500	OS06T0484500-01	1,45674E-06	0,593685763	0,246242689	up	R3	TIP	wet	126	0,476190476	chr06	16500457	DNAnona/MULE	chr06	16504514	16505330	+	Conserved hypothetical protein. (Os06t0484500-01)
indica	TIP_58769	Os09g0270900	OS09T0270900-02	1,52724E-06	0,483617928	0,245308397	up	R3	TIP	wet	119	0,218487395	chr09	5312050	LTR/Gypsy	chr09	5306896	5309044	-	BolA-like protein domain containing protein. (Os09t0270900-01);Similar to EMB1374. (Os09t0270900-02)
indica	TIP_59638	Os09g0362800	OS09T0362800-01	1,52724E-06	0,258339453	0,245214559	up	R3	TIP	wet	126	0,119047619	chr09	11860496	LTR/Copia	chr09	11862271	11866452	+	Hypothetical conserved gene. (Os09t0362800-01);Peptidase M1, alanine aminopeptidase/leukotriene A4 hydrolase domain containing protein. (Os09t0362800-02)
indica	TIP_72761	Os12g0228800	OS12T0228800-01	2,30608E-06	0,394091589	0,240069996	up	R3	TIP	wet	126	0,055555556	chr12	7011488	MITE/Stow	chr12	7014180	7014828	-	Similar to Calmodulin-like protein. (Os12t0228800-01)
indica	TIP_2107	Os01g0256500	OS01T0256500-02	2,65713E-06	1,569107635	0,238148017	up	R3	TIP	wet	110	0,909090909	chr01	8542846	MITE/Stow	chr01	8546065	8546869	-	Similar to ZnI. (Os01t0256500-02)
indica	TIP_41619	Os06g0241200	OS06T0241200-01	3,64011E-06	0,356464817	0,234068753	up	R3	TIP	wet	119	0,277310924	chr06	7329511	DNAnona/MULE	chr06	7333167	7336677	+	Conserved hypothetical protein. (Os06t0241200-01)
indica	TIP_40623	Os06g0159900	OS06T0159900-01	3,64011E-06	0,381477915	0,233924976	up	R3	TIP	wet	126	0,238095238	chr06	3059828	MITE/Stow	chr06	3051248	3055005	+	Similar to Arm repeat containing protein. (Os06t0159900-01)
indica	TIP_46627	Os07g0110800	OS07T0110800-01	5,40749E-06	0,822233989	0,228925187	up	R3	TIP	wet	108	0,638888889	chr07	606924	MITE/Tourist	chr07	604586	607425	-	Conserved hypothetical protein. (Os07t0110800-01)
indica	TIP_15753	Os02g0635000	OS02T0635000-01	5,48301E-06	0,561414277	0,228545972	up	R3	TIP	wet	126	0,301587302	chr02	25459384	DNAnona/MULE	chr02	25459520	25462586	+	Nitrilase, Regulation of root growth (Os02t0635000-01)
indica	TIP_67482	Os11g0155600	OS11T0155600-01	5,60016E-06	-0,896117778	0,228081955	down	R3	TIP	wet	126	0,174603175	chr11	2603743	LINE/unknown	chr11	2605752	2614119	-	Conserved hypothetical protein. (Os11t0155600-01)
indica	TIP_169	Os01g0116900	OS01T0116900-00	6,56641E-06	0,753610519	0,225943005	up	R3	TIP	wet	123	0,146341463	chr01	937226	MITE/Tourist	chr01	924451	956639	+	Protein kinase, catalytic domain domain containing protein. (Os01t0116900-00)
indica	TIP_55229	Os08g0366100	OS08T0366100-01	7,88009E-06	-0,327831198	0,22351909	down	R3	TIP	wet	125	0,496	chr08	16983803	MITE/Stow	chr08	16982279	16985259	+	Similar to Endothelial differentiation-related factor 1 (EDF-1) (Multiprotein bridging factor 1) (MBF1). (Os08t0366100-01)
indica	TIP_34204	Os05g0161500	OS05T0161500-01	8,24168E-06	-0,635720416	0,222772836	down	R3	TIP	wet	126	0,349206349	chr05	3628628	DNAnona/hAT	chr05	3626394	3629080	+	Calcium-activated (p)ppGpp synthetase, Ca<sup>2+</sup>-activated RelA-SpoT homolog 2 (Os05t0161500-01)
indica	TIP_40855	Os06g0184800	OS06T0184800-01	1,54694E-05	-0,674059453	0,214851187	down	R3	TIP	wet	126	0,785714286	chr06	4260021	MITE/Stow	chr06	4264424	4265115	-	Similar to Low-temperature induced protein lt101.1 (Blt101) (Blt101.1). (Os06t0184800-01)
indica	TIP_68632	Os11g0262600	OS11T0262600-00	2,89854E-05	-0,640279778	0,206883154	down	R3	TIP	wet	126	0,341269841	chr11	8862645	MITE/Stow	chr11	8864479	8866289	-	Conserved hypothetical protein. (Os11t0262600-00)
indica	TIP_67483	Os11g0155600	OS11T0155600-01	3,03577E-05	-0,903719534	0,206114924	down	R3	TIP	wet	126	0,150793651	chr11	2604522	MITE/Tourist	chr11	2605752	2614119	-	Conserved hypothetical protein. (Os11t0155600-01)
indica	TIP_29623	Os04g0405401	OS04T0405401-01	3,10673E-05	0,263511518	0,205637261	up	R3	TIP	wet	120	0,2	chr04	20119077	DNAnona/Helitron	chr04	20117097	20119136	-	Hypothetical conserved gene. (Os04t0405401-01)
indica	TIP_68633	Os11g0262600	OS11T0262600-00	3,30823E-05	0,630167087	0,204667071	up	R3	TIP	wet	126	0,642857143	chr11	8863708	MITE/Tourist	chr11	8864479	8866289	-	Conserved hypothetical protein. (Os11t0262600-00)
indica	TIP_50502	Os07g0534000	OS07T0534000-01	3,47488E-05	-0,68070363	0,2036874	down	R3	TIP	wet	126	0,80952381	chr07	20938340	MITE/Tourist	chr07	20936091	20941652	+	Similar to permeases of the major facilitator superfamily. (Os07t0534000-01)
indica	TIP_50501	Os07g0534000	OS07T0534000-01	3,47488E-05	0,68070363	0,2036874	up	R3	TIP	wet	126	0,19047619	chr07	20937080	MITE/Stow	chr07	20936091	20941652	+	Similar to permeases of the major facilitator superfamily. (Os07t0534000-01)
indica	TIP_24698	Os03g0673600	OS03T0673600-01	4,67317E-05	1,026644193	0,199802984	up	R3	TIP	wet	115	0,252173913	chr03	26622142	DNAnona/CACTA	chr03	26617086	26618211	-	Conserved hypothetical protein. (Os03t0673600-01)
indica	TIP_22139	Os03g0386000	OS03T0386000-01	5,06996E-05	-0,518463416	0,198603356	down	R3	TIP	wet	126	0,642857143	chr03	15337177	DNAnona/Helitron	chr03	15329520	15334903	+	Similar to Salt-responsive WD40 protein 5. (Os03t0386000-01);WD40 subfamily protein, Salt stress (Os03t0386000-02)
indica	TIP_68142	Os11g0216100	OS11T0216100-01	6,34857E-05	-0,578778303	0,195601548	down	R3	TIP	wet	126	0,706349206	chr11	6066143	SINE/unknown	chr11	6065311	6066797	-	Similar to Heat shock protein binding protein. (Os11t0216100-01)
indica	TIP_18342	Os03g0104800	OS03T0104800-01	7,37701E-05	-0,166526452	0,193536	down	R3	TIP	wet	125	0,96	chr03	306573	DNAnona/Helitron	chr03	305896	308455	-	Hypothetical conserved gene. (Os03t0104800-01)
indica	TIP_44215	Os06g0563000	OS06T0563000-01	7,71624E-05	-1,11446192	0,192797	down	R3	TIP	wet	125	0,96	chr06	21644392	MITE/Tourist	chr06	21637467	21641983	-	Ndr family protein. (Os06t0563000-01)
indica	TIP_55228	Os08g0366100	OS08T0366100-01	0,000110357	0,313129456	0,188099154	up	R3	TIP	wet	119	0,411764706	chr08	16981930	MITE/Tourist	chr08	16982279	16985259	+	Similar to Endothelial differentiation-related factor 1 (EDF-1) (Multiprotein bridging factor 1) (MBF1). (Os08t0366100-01)
indica	TIP_37375	Os05g0404400	OS05T0404400-02	0,000111958	0,425865126	0,187748388	up	R3	TIP	wet	126	0,579365079	chr05	19693132	MITE/Tourist	chr05	19691349	19694288	-	Similar to RPH1 (RESISTANCE TO PHYTOPHTHORA 1). (Os05t0404400-01);Similar to RPH1 (RESISTANCE TO PHYTOPHTHORA 1). (Os05t0404400-02)
indica	TIP_61803	Os09g0517000	OS09T0517000-01	0,000119033	0,825118654	0,186804403	up	R3	TIP	wet	126	0,841269841	chr09	20157583	MITE/Stow	chr09	20156455	20157191	+	Conserved hypothetical protein. (Os09t0517000-01)
indica	TIP_32930	Os04g0655300	OS04T0655300-01	0,000147412	-0,646343603	0,18391998	down	R3	TIP	wet	125	0,712	chr04	33418334	LINE/unknown	chr04	33418637	33421199	+	Response to drought in tolerant rice genotype Nagina 22, Response to submergence in japonica cultivar Taikeng 9, Response to Xanthomonas oryzae pv. oryzae in resistant rice genotype IRBB21 (Os04t0655300-01)
indica	TIP_53604	Os08g0183900	OS08T0183900-01	0,000166759	-0,725000001	0,182185003	down	R3	TIP	wet	126	0,126984127	chr08	4898051	DNAnona/unknown	chr08	4897613	4900341	-	Similar to dihydroflavonol-4-reductase. (Os08t0183900-01)
indica	TIP_32657	Os04g0630400	OS04T0630400-01	0,000176629	-0,741894694	0,181290128	down	R3	TIP	wet	126	0,738095238	chr04	32061496	MITE/Tourist	chr04	32063756	32065731	+	NAD(P)-binding domain containing protein. (Os04t0630400-01)
indica	TIP_32892	Os04g0653000	OS04T0653000-01	0,000190463	0,595008577	0,18016749	up	R3	TIP	wet	126	0,166666667	chr04	33303873	MITE/Tourist	chr04	33306468	33310169	+	Jasmonic acid (JA) signalling repressor, Regulation of spikelet development (Os04t0653000-01)
indica	TIP_59883	Os09g0380400	OS09T0380400-01	0,000194531	0,617632131	0,179740197	up	R3	TIP	wet	126	0,785714286	chr09	12837802	DNAnona/MULE	chr09	12833971	12834961	+	Conserved hypothetical protein. (Os09t0380400-01)
indica	TIP_40181	Os06g0124900	OS06T0124900-01	0,000200862	-0,790675326	0,179175151	down	R3	TIP	wet	126	0,904761905	chr06	1343058	DNAnona/hAT	chr06	1341610	1344490	+	Conserved hypothetical protein. (Os06t0124900-01)
indica	TIP_24698	Os03g0673700	OS03T0673700-01	0,000242183	0,633078208	0,176623637	up	R3	TIP	wet	115	0,252173913	chr03	26622142	DNAnona/CACTA	chr03	26622941	26623429	+	Similar to predicted protein. (Os03t0673700-01)
indica	TIP_38610	Os05g0492500	OS05T0492500-01	0,000278002	0,546605749	0,174699556	up	R3	TIP	wet	112	0,285714286	chr05	24196744	DNAnona/Helitron	chr05	24194658	24202634	-	Hypothetical protein. (Os05t0492500-01)
indica	TIP_45975	Os06g0690200	OS06T0690200-01	0,000299235	0,595759847	0,173337655	up	R3	TIP	wet	126	0,03968254	chr06	28778838	LTR/Gypsy	chr06	28770374	28774431	-	Response to drought or chilling in tolerant genotypes, Response to submergence (Os06t0690200-01)
indica	TIP_41184	Os06g0210200	OS06T0210200-01	0,000299235	-0,571826095	0,173306104	down	R3	TIP	wet	126	0,880952381	chr06	5621083	MITE/Tourist	chr06	5621964	5625687	+	Peptidase M20 domain containing protein. (Os06t0210200-01)
indica	TIP_41185	Os06g0210200	OS06T0210200-01	0,000299235	0,571826095	0,173306104	up	R3	TIP	wet	126	0,119047619	chr06	5626139	DNAnona/MULE	chr06	5621964	5625687	+	Peptidase M20 domain containing protein. (Os06t0210200-01)
indica	TIP_27791	Os04g0188433	OS04T0188433-01	0,000333505	-0,780685872	0,171763182	down	R3	TIP	wet	126	0,753968254	chr04	5928415	MITE/Stow	chr04	5931193	5931871	-	Similar to OSIGBa0102N07.2 protein. (Os04t0188433-01)
indica	TIP_41602	Os06g0239200	OS06T0239200-00	0,000400965	-0,521142609	0,169240219	down	R3	TIP	wet	119	0,512605042	chr06	7227395	DNAnona/MULEtir	chr06	7230221	7230662	+	Conserved hypothetical protein. (Os06t0239200-00)
indica	TIP_39336	Os05g0546300	OS05T0546300-01	0,000514303	0,257861175	0,165873538	up	R3	TIP	wet	126	0,293650794	chr05	27121709	MITE/Tourist	chr05	27119121	27120202	+	Hypothetical protein. (Os05t0546300-01)
indica	TIP_2025	Os01g0249900	OS01T0249900-01	0,000529868	-0,330663635	0,165344956	down	R3	TIP	wet	126	0,896825397	chr01	8230014	MITE/Tourist	chr01	8234625	8235833	-	Protein of unknown function DUF573 family protein. (Os01t0249900-01)
indica	TIP_61206	Os09g0470500	OS09T0470500-01	0,000544892	-0,58827986	0,164841696	down	R3	TIP	wet	126	0,23015873	chr09	17909769	MITE/Tourist	chr09	17903166	17904869	+	Homeodomain-leucine zipper (HD-Zip) protein, Regulation of gibberellin signaling (Os09t0470500-01)
indica	TIP_9857	Os01g0965900	OS01T0965900-01	0,000557651	-0,432789792	0,164402249	down	R3	TIP	wet	126	0,785714286	chr01	42592996	LINE/unknown	chr01	42587307	42590270	-	Conserved hypothetical protein. (Os01t0965900-01)
indica	TIP_580	Os01g0158200	OS01T0158200-01	0,00057715	0,663488231	0,163818262	up	R3	TIP	wet	126	0,134920635	chr01	3051094	DNAnona/MULE	chr01	3054481	3057198	+	Similar to Serine carboxypeptidase II-1 precursor (EC 3.4.16.6) (CP-MII.1) (Fragment). (Os01t0158200-01)
indica	TIP_11492	Os02g0212500	OS02T0212500-01	0,000644048	0,530403365	0,162255783	up	R3	TIP	wet	116	0,784482759	chr02	6272296	LINE/unknown	chr02	6270314	6271547	+	Conserved hypothetical protein. (Os02t0212500-01)
indica	TIP_52703	Os08g0112700	OS08T0112700-01	0,000648061	0,637391523	0,16204005	up	R3	TIP	wet	126	0,166666667	chr08	677789	DNAnona/hAT	chr08	679358	681703	+	MADS-box transcription factor, Regulator of both biotic and abiotic stress responses (Os08t0112700-01)
indica	TIP_5802	Os01g0647850	OS01T0647850-01	0,000729307	0,306771635	0,160367744	up	R3	TIP	wet	113	0,159292035	chr01	26114942	DNAnona/Helitron	chr01	26115235	26119289	-	Hypothetical conserved gene. (Os01t0647850-01)
indica	TIP_48085	Os07g0223766	OS07T0223766-01	0,000741008	-0,35330708	0,160027815	down	R3	TIP	wet	126	0,920634921	chr07	6854148	DNAnona/Helitron	chr07	6849842	6851728	-	Hypothetical conserved gene. (Os07t0223766-01)
indica	TIP_53901	Os08g0227200	OS08T0227200-02	0,000753771	0,258295552	0,159673963	up	R3	TIP	wet	126	0,349206349	chr08	7756290	DNAnona/hAT	chr08	7760699	7762222	-	Kelch related domain containing protein. (Os08t0227200-02)
indica	TIP_9723	Os01g0954000	OS01T0954000-01	0,000783806	0,782468408	0,159034195	up	R3	TIP	wet	126	0,119047619	chr01	42023200	LTR/Copia	chr01	42018073	42019444	+	NADPH-dependent FMN reductase family protein. (Os01t0954000-01)
indica	TIP_39334	Os05g0546300	OS05T0546300-01	0,000812801	0,250080912	0,158431239	up	R3	TIP	wet	126	0,301587302	chr05	27119972	DNAauto/MULE	chr05	27119121	27120202	+	Hypothetical protein. (Os05t0546300-01)
indica	TIP_32891	Os04g0653000	OS04T0653000-01	0,00083504	0,546918571	0,157951132	up	R3	TIP	wet	126	0,174603175	chr04	33303047	MITE/Tourist	chr04	33306468	33310169	+	Jasmonic acid (JA) signalling repressor, Regulation of spikelet development (Os04t0653000-01)
indica	TIP_71229	Os11g0642800	OS11T0642800-01	0,000873246	0,489006253	0,157240076	up	R3	TIP	wet	126	0,69047619	chr11	25499454	DNAnona/MULE	chr11	25492192	25496841	+	Glutathione synthetase (Os11t0642800-01)
indica	TIP_27073	Os03g0849600	OS03T0849600-01	0,000887579	0,384320593	0,156902012	up	R3	TIP	wet	126	0,587301587	chr03	35744542	MITE/Tourist	chr03	35736085	35741607	-	COG complex component, COG2 family protein. (Os03t0849600-01)
indica	TIP_4826	Os01g0579900	OS01T0579900-01	0,000889681	0,520183326	0,156747084	up	R3	TIP	wet	126	0,69047619	chr01	22436859	MITE/Stow	chr01	22439040	22441966	-	Esterase/lipase/thioesterase domain containing protein. (Os01t0579900-01)
indica	TIP_29027	Os04g0364800	OS04T0364800-00	0,001461982	0,421728746	0,150106987	up	R3	TIP	wet	112	0,5625	chr04	17560371	MITE/Stow	chr04	17560683	17561234	+	Barwin-related endoglucanase domain containing protein. (Os04t0364800-00)
indica	TIP_48004	Os07g0212200	OS07T0212200-01	0,001473721	0,630140602	0,149879301	up	R3	TIP	wet	122	0,827868852	chr07	6141632	DNAnona/MULE	chr07	6134016	6136740	+	Similar to MRNA-binding protein (Fragment). (Os07t0212200-01)
indica	TIP_697	Os01g0170900	OS01T0170900-01	0,001548265	-0,509052105	0,149108223	down	R3	TIP	wet	126	0,634920635	chr01	3665958	SINE/unknown	chr01	3665042	3666044	-	Conserved hypothetical protein. (Os01t0170900-01)
indica	TIP_47232	Os07g0162500	OS07T0162500-02	0,001756981	-0,618510826	0,147320851	down	R3	TIP	wet	126	0,095238095	chr07	3347485	MITE/Tourist	chr07	3342219	3343596	-	Alpha/beta hydrolase fold-3 domain containing protein. (Os07t0162500-02)
indica	TIP_68631	Os11g0262600	OS11T0262600-00	0,001795643	-0,561715746	0,146914255	down	R3	TIP	wet	126	0,293650794	chr11	8861828	DNAnona/CACTA	chr11	8864479	8866289	-	Conserved hypothetical protein. (Os11t0262600-00)
indica	TIP_24695	Os03g0673700	OS03T0673700-01	0,001910636	0,539540002	0,145976358	up	R3	TIP	wet	124	0,274193548	chr03	26618960	DNAnona/hAT	chr03	26622941	26623429	+	Similar to predicted protein. (Os03t0673700-01)
indica	TIP_46974	Os07g0142900	OS07T0142900-01	0,001936803	-0,436044741	0,145679267	down	R3	TIP	wet	126	0,658730159	chr07	2191529	DNAnona/Helitron	chr07	2193809	2196930	+	Aldo/keto reductase family protein. (Os07t0142900-01)
indica	TIP_3790	Os01g0391100	OS01T0391100-02	0,002069892	-0,531576326	0,144684487	down	R3	TIP	wet	126	0,968253968	chr01	16540758	LTR/Gypsy	chr01	16536661	16542320	-	Hypothetical gene. (Os01t0391100-01);Hypothetical protein. (Os01t0391100-02);Hypothetical protein. (Os01t0391100-03)
indica	TIP_20552	Os03g0269900	OS03T0269900-01	0,002194144	-0,637850363	0,143797883	down	R3	TIP	wet	126	0,158730159	chr03	9014808	MITE/Tourist	chr03	9011629	9016463	+	Protein of unknown function DUF604 family protein. (Os03t0269900-01)
indica	TIP_24699	Os03g0673600	OS03T0673600-01	0,002273659	0,743516051	0,143212131	up	R3	TIP	wet	124	0,39516129	chr03	26622437	MITE/Tourist	chr03	26617086	26618211	-	Conserved hypothetical protein. (Os03t0673600-01)
indica	TIP_60554	Os09g0428900	OS09T0428900-01	0,002397346	0,396612711	0,142396929	up	R3	TIP	wet	126	0,206349206	chr09	15589044	MITE/Stow	chr09	15583194	15586475	+	Similar to Conserved protein. (Os09t0428900-01)
indica	TIP_49904	Os07g0486500	OS07T0486500-02	0,002405354	-0,34890834	0,142239993	down	R3	TIP	wet	126	0,484126984	chr07	17912109	MITE/Tourist	chr07	17907341	17912298	+	RhoGAP domain containing protein. (Os07t0486500-01);RhoGAP domain containing protein. (Os07t0486500-02)
indica	TIP_27072	Os03g0849600	OS03T0849600-01	0,002560594	-0,363720132	0,141299149	down	R3	TIP	wet	126	0,420634921	chr03	35740992	MITE/Stow	chr03	35736085	35741607	-	COG complex component, COG2 family protein. (Os03t0849600-01)
indica	TIP_41399	Os06g0225300	OS06T0225300-02	0,002785841	-0,189797524	0,14006959	down	R3	TIP	wet	126	0,817460317	chr06	6487391	MITE/Stow	chr06	6484167	6488553	-	Similar to SERK1 (Fragment). (Os06t0225300-01);Similar to SERK1 (Fragment). (Os06t0225300-02)
indica	TIP_24690	Os03g0673600	OS03T0673600-01	0,003144899	0,816485065	0,138349012	up	R3	TIP	wet	124	0,258064516	chr03	26613339	MITE/Stow	chr03	26617086	26618211	-	Conserved hypothetical protein. (Os03t0673600-01)
indica	TIP_67873	Os11g0184900	OS11T0184900-02	0,003280739	-0,450590665	0,137677318	down	R3	TIP	wet	126	0,555555556	chr11	4305229	DNAnona/MULE	chr11	4299277	4301784	-	Similar to OsNAC5 protein [imported]-rice. (Os11t0184900-01);NAC-type transcription factor, Regulation of stress-inducible genes, Stress tolerance (Os11t0184900-02)
indica	TIP_17967	Os02g0807000	OS02T0807000-01	0,003503899	0,303129411	0,136693119	up	R3	TIP	wet	125	0,32	chr02	34470181	SINE/unknown	chr02	34468754	34470169	-	Similar to Phosphoenolpyruvate carboxylase kinase 1. (Os02t0807000-01)
indica	TIP_59881	Os09g0380400	OS09T0380400-01	0,003967981	0,544318803	0,134928497	up	R3	TIP	wet	123	0,788617886	chr09	12833738	DNAnona/MULE	chr09	12833971	12834961	+	Conserved hypothetical protein. (Os09t0380400-01)
indica	TIP_11565	Os02g0222100	OS02T0222100-01	0,00404086	-0,273498544	0,134578784	down	R3	TIP	wet	126	0,380952381	chr02	6810923	DNAauto/hAT	chr02	6810648	6814078	+	Similar to Cysteine synthase (EC 4.2.99.8). (Os02t0222100-01)
indica	TIP_40857	Os06g0185100	OS06T0185100-00	0,004306422	-0,561849221	0,133623517	down	R3	TIP	wet	126	0,206349206	chr06	4280922	DNAnona/hAT	chr06	4276289	4277154	+	Similar to estradiol 17-beta-dehydrogenase 8. (Os06t0185100-00)
indica	TIP_53491	Os08g0174100	OS08T0174100-00	0,004443812	0,496357069	0,133098874	up	R3	TIP	wet	125	0,104	chr08	4313658	MITE/Stow	chr08	4316104	4318545	-	Similar to transferase family protein. (Os08t0174100-00)
indica	TIP_49938	Os07g0490400	OS07T0490400-01	0,004587522	0,758532056	0,132569203	up	R3	TIP	wet	126	0,063492063	chr07	18228674	DNAauto/MULE	chr07	18228610	18232364	+	Peptidyl-prolyl cis-trans isomerase, FKBP-type domain containing protein. (Os07t0490400-01)
indica	TIP_14341	Os02g0532300	OS02T0532300-02	0,004898141	0,374063545	0,131589968	up	R3	TIP	wet	126	0,452380952	chr02	19595686	DNAnona/MULE	chr02	19591287	19595510	+	Hypothetical conserved gene. (Os02t0532300-01);Alpha/beta hydrolase fold-1 domain containing protein. (Os02t0532300-02)
indica	TIP_53785	Os08g0203800	OS08T0203800-01	0,005072556	0,206147385	0,131019015	up	R3	TIP	wet	124	0,169354839	chr08	6057372	LTR/Gypsy	chr08	6055827	6058993	+	Cyclin-like F-box domain containing protein. (Os08t0203800-01)
indica	TIP_50500	Os07g0534000	OS07T0534000-01	0,005091706	0,598724033	0,130866166	up	R3	TIP	wet	126	0,150793651	chr07	20936030	DNAnona/Helitron	chr07	20936091	20941652	+	Similar to permeases of the major facilitator superfamily. (Os07t0534000-01)
indica	TIP_62380	Os09g0560800	OS09T0560800-01	0,005185409	-0,392579082	0,130520575	down	R3	TIP	wet	126	0,76984127	chr09	22284693	MITE/Stow	chr09	22281491	22284167	+	Molybdenum cofactor sulfurase, C-terminal domain containing protein. (Os09t0560800-01)
indica	TIP_9861	Os01g0966400	OS01T0966400-01	0,005864243	0,499679907	0,128772884	up	R3	TIP	wet	126	0,825396825	chr01	42613785	MITE/Stow	chr01	42618478	42621704	-	Leucine-rich repeat, SDS22 containing protein. (Os01t0966400-01)
indica	TIP_71470	Os11g0703100	OS11T0703100-01	0,005880803	0,92288395	0,128634777	up	R3	TIP	wet	126	0,047619048	chr11	28780903	DNAnona/Helitron	chr11	28783185	28783983	+	Thaumatin, pathogenesis-related family protein. (Os11t0703100-01)
indica	TIP_75461	Os12g0606100	OS12T0606100-00	0,006042893	-0,368691398	0,12817089	down	R3	TIP	wet	126	0,888888889	chr12	25611807	DNAnona/MULE	chr12	25605994	25611594	+	Hypothetical conserved gene. (Os12t0606100-00)
indica	TIP_32658	Os04g0630400	OS04T0630400-01	0,006282612	0,628573241	0,127550553	up	R3	TIP	wet	126	0,253968254	chr04	32063559	DNAnona/MULE	chr04	32063756	32065731	+	NAD(P)-binding domain containing protein. (Os04t0630400-01)
indica	TIP_21138	Os03g0313800	OS03T0313800-00	0,006519599	-0,467946908	0,126808911	down	R3	TIP	wet	126	0,206349206	chr03	11215019	DNAauto/POLE	chr03	11217875	11218517	-	Hypothetical conserved gene. (Os03t0313800-00)
indica	TIP_41083	Os06g0205100	OS06T0205100-01	0,006519599	0,491152425	0,126802248	up	R3	TIP	wet	126	0,222222222	chr06	5319564	MITE/Tourist	chr06	5315163	5316875	+	Similar to Transcriptional activator. (Os06t0205100-01);R2R3-Myb factor, Homolog of maize C1, Determinant of anthocyanin biosynthesis in rice leaves, Apiculus and leaf sheath colour (Os06t0205100-02)
indica	TIP_2479	Os01g0280200	OS01T0280200-01	0,006519599	-0,190379069	0,126761411	down	R3	TIP	wet	124	0,709677419	chr01	9954790	LTR/Gypsy	chr01	9954154	9955696	+	IQ motif, EF-hand binding site domain containing protein. (Os01t0280200-01)
indica	TIP_51406	Os07g0605350	OS07T0605350-00	0,006553681	-0,456485714	0,1265953	down	R3	TIP	wet	116	0,232758621	chr07	24809219	MITE/Tourist	chr07	24805571	24805912	+	Similar to Protein EGG APPARATUS-1. (Os07t0605350-00)
indica	TIP_2109	Os01g0256600	OS01T0256600-01	0,00675309	0,446348381	0,126097601	up	R3	TIP	wet	126	0,753968254	chr01	8559629	DNAnona/hAT	chr01	8555289	8557146	-	Ribosomal protein L18/L5 domain containing protein. (Os01t0256600-01)
indica	TIP_55548	Os08g0398400	OS08T0398400-01	0,007095538	-0,316522377	0,125299304	down	R3	TIP	wet	126	0,301587302	chr08	19013204	MITE/Stow	chr08	19011905	19015935	+	Hypersensitive induced reaction protein, Bacterial pathogen resistance (Os08t0398400-01)
indica	TIP_66601	Os10g0552700	OS10T0552700-01	0,007095538	-0,32063055	0,125244427	down	R3	TIP	wet	126	0,753968254	chr10	21694212	LTR/Gypsy	chr10	21693876	21694502	-	Similar to Tumor-related protein (Fragment). (Os10t0552700-01)
indica	TIP_55649	Os08g0406400	OS08T0406400-01	0,007373045	-0,495888563	0,124635492	down	R3	TIP	wet	126	0,222222222	chr08	19432680	SINE/unknown	chr08	19430807	19432690	+	Similar to Sulfate transporter (Fragment). (Os08t0406400-01)
indica	TIP_75782	Os12g0628100	OS12T0628100-01	0,007694019	-0,731860832	0,123969837	down	R3	TIP	wet	125	0,6	chr12	26894533	MITE/Tourist	chr12	26888810	26890166	-	Similar to Actin-depolymerizing factor 6 (ADF-6) (AtADF6). (Os12t0628100-01)
indica	TIP_2555	Os01g0286100	OS01T0286100-01	0,00771046	-0,521947556	0,123848754	down	R3	TIP	wet	126	0,238095238	chr01	10275976	LTR/Gypsy	chr01	10271157	10274304	-	Phytochrome-interacting factor-like protein, Basic helix-loop-helix factor, Repression of seedling growth in the dark (Os01t0286100-01)
indica	TIP_30853	Os04g0499200	OS04T0499200-01	0,007919539	-0,568396468	0,123397247	down	R3	TIP	wet	126	0,142857143	chr04	24945654	MITE/Tourist	chr04	24943121	24945222	-	Enhancer of rudimentary family protein. (Os04t0499200-01)
indica	TIP_32894	Os04g0653000	OS04T0653000-01	0,008305717	0,4909604	0,122665633	up	R3	TIP	wet	126	0,166666667	chr04	33310571	MITE/Tourist	chr04	33306468	33310169	+	Jasmonic acid (JA) signalling repressor, Regulation of spikelet development (Os04t0653000-01)
indica	TIP_70450	Os11g0539600	OS11T0539600-00	0,008558038	-0,234799541	0,122172287	down	R3	TIP	wet	115	0,6	chr11	19703784	MITE/Tourist	chr11	19701215	19702758	-	Conserved hypothetical protein. (Os11t0539600-00)
indica	TIP_59997	Os09g0393200	OS09T0393200-01	0,008698074	-0,48727297	0,12186377	down	R3	TIP	wet	126	0,96031746	chr09	13599269	DNAnona/MULE	chr09	13595422	13601889	+	Similar to transcription factor jumonji (jmjC) domain-containing protein. (Os09t0393200-01)
indica	TIP_52497	Os07g0693000	OS07T0693000-01	0,008754392	-0,500254136	0,121687423	down	R3	TIP	wet	126	0,857142857	chr07	29488738	DNAnona/MULE	chr07	29484521	29487346	+	Similar to Ser-thr protein kinase (Fragment). (Os07t0693000-01)
indica	TIP_162	Os01g0115700	OS01T0115700-00	0,009181085	-0,324904519	0,120917494	down	R3	TIP	wet	122	0,401639344	chr01	853367	LINE/unknown	chr01	851835	854599	-	Receptor-like kinase 19 (Os01t0115700-01)
indica	TIP_14745	Os02g0556100	OS02T0556100-01	0,009181085	0,429816751	0,120869274	up	R3	TIP	wet	116	0,663793103	chr02	21043142	MITE/Tourist	chr02	21027755	21038792	+	NAD(P)-binding domain containing protein. (Os02t0556100-01)
indica	TIP_544	Os01g0152900	OS01T0152900-00	0,010290876	-0,428727917	0,119243281	down	R3	TIP	wet	126	0,301587302	chr01	2844146	MITE/Tourist	chr01	2844503	2845212	-	Similar to Histone H2B.1. (Os01t0152900-00)
indica	TIP_44232	Os06g0564500	OS06T0564500-01	0,010597121	-0,691823083	0,118690316	down	R3	TIP	wet	123	0,918699187	chr06	21705452	DNAnona/Tourist	chr06	21700599	21703282	-	Cysteine synthase (EC 4.2.99.8). (Os06t0564500-01)
indica	TIP_60	Os01g0105900	OS01T0105900-01	0,010597121	-0,558409359	0,118673631	down	R3	TIP	wet	126	0,166666667	chr01	305239	DNAauto/MLE	chr01	309520	313170	-	PfkB carbohydrate kinase protein, Regulation of plant height and leaf structure (Os01t0105900-01)
indica	TIP_50499	Os07g0534000	OS07T0534000-01	0,011016984	0,546052445	0,11806303	up	R3	TIP	wet	126	0,166666667	chr07	20934176	DNAnona/MULE	chr07	20936091	20941652	+	Similar to permeases of the major facilitator superfamily. (Os07t0534000-01)
indica	TIP_53493	Os08g0174100	OS08T0174100-00	0,011254838	-0,451557237	0,117688959	down	R3	TIP	wet	126	0,888888889	chr08	4318661	LTR/Copia	chr08	4316104	4318545	-	Similar to transferase family protein. (Os08t0174100-00)
indica	TIP_51997	Os07g0657600	OS07T0657600-01	0,011472788	-0,346763172	0,117344778	down	R3	TIP	wet	126	0,714285714	chr07	27688033	MITE/Stow	chr07	27686536	27688834	-	Hypothetical conserved gene. (Os07t0657600-01)
indica	TIP_63931	Os10g0343100	OS10T0343100-01	0,011553899	-0,39056341	0,117164956	down	R3	TIP	wet	126	0,333333333	chr10	10174319	MITE/Tourist	chr10	10170579	10174444	+	Syntaxin 6, N-terminal domain containing protein. (Os10t0343100-01)
indica	TIP_34317	Os05g0170950	OS05T0170950-00	0,011655278	-0,375319614	0,116962797	down	R3	TIP	wet	126	0,531746032	chr05	4252043	DNAnona/Helitron	chr05	4254052	4254939	+	Similar to Plastid phosphoenolpyruvate/phosphate translocator. (Os05t0170950-00)
indica	TIP_29625	Os04g0405401	OS04T0405401-01	0,011902498	-0,171456175	0,116595584	down	R3	TIP	wet	126	0,714285714	chr04	20122884	MITE/Tourist	chr04	20117097	20119136	-	Hypothetical conserved gene. (Os04t0405401-01)
indica	TIP_32107	Os04g0589500	OS04T0589500-01	0,012296262	-0,439749257	0,116072583	down	R3	TIP	wet	126	0,293650794	chr04	29801784	LTR/Copia	chr04	29798282	29801702	+	Conserved hypothetical protein. (Os04t0589500-01)
indica	TIP_62375	Os09g0559600	OS09T0559600-01	0,012470665	-0,403156957	0,11579953	down	R3	TIP	wet	126	0,261904762	chr09	22239480	DNAauto/MULE	chr09	22235366	22235951	+	Thioredoxin domain 2 containing protein. (Os09t0559600-01)
indica	TIP_40552	Os06g0154400	OS06T0154400-01	0,012634084	0,631207601	0,115541324	up	R3	TIP	wet	121	0,066115702	chr06	2802746	DNAnona/unknown	chr06	2803042	2806247	+	Domain of unknown function DUF676, lipase-like domain containing protein. (Os06t0154400-01)
indica	TIP_4827	Os01g0579900	OS01T0579900-01	0,013238171	-0,459534045	0,114827941	down	R3	TIP	wet	126	0,277777778	chr01	22439969	DNAnona/MULE	chr01	22439040	22441966	-	Esterase/lipase/thioesterase domain containing protein. (Os01t0579900-01)
indica	TIP_46558	Os07g0105600	OS07T0105600-01	0,013269466	0,527115034	0,114712013	up	R3	TIP	wet	126	0,174603175	chr07	311337	DNAnona/hAT	chr07	306054	306968	+	Photosystem II oxygen evolving complex protein PsbQ family protein. (Os07t0105600-01)
indica	TIP_9856	Os01g0965900	OS01T0965900-01	0,013269466	-0,352285229	0,114633981	down	R3	TIP	wet	126	0,76984127	chr01	42586676	MITE/Stow	chr01	42587307	42590270	-	Conserved hypothetical protein. (Os01t0965900-01)
indica	TIP_8081	Os01g0825800	OS01T0825800-02	0,013554351	-0,188718753	0,11426626	down	R3	TIP	wet	126	0,611111111	chr01	35321001	DNAnona/Helitron	chr01	35320840	35327164	-	Amino acid transporter, transmembrane domain containing protein. (Os01t0825800-01);Similar to Amino acid-polyamine transporter. (Os01t0825800-02)
indica	TIP_543	Os01g0152900	OS01T0152900-00	0,013557314	0,413637896	0,114183462	up	R3	TIP	wet	126	0,682539683	chr01	2839521	LINE/unknown	chr01	2844503	2845212	-	Similar to Histone H2B.1. (Os01t0152900-00)
indica	TIP_60938	Os09g0451400	OS09T0451400-01	0,013723676	-0,413830201	0,113939015	down	R3	TIP	wet	126	0,531746032	chr09	16925727	DNAnona/Helitron	chr09	16925457	16927046	+	ACC oxidase, Ethylene biosynthesis (Os09t0451400-01)
indica	TIP_43760	Os06g0529900	OS06T0529900-00	0,01392675	-0,507473993	0,113661248	down	R3	TIP	wet	125	0,92	chr06	19700223	MITE/Stow	chr06	19701309	19702347	+	Hypothetical conserved gene. (Os06t0529900-00)
indica	TIP_27404	Os04g0121100	OS04T0121100-01	0,014068375	0,625256275	0,11344578	up	R3	TIP	wet	126	0,119047619	chr04	1249238	MITE/Tourist	chr04	1248450	1260282	+	Similar to OSIGBa0115D20.4 protein. (Os04t0121100-01)
indica	TIP_15113	Os02g0585200	OS02T0585200-01	0,014708986	-0,489664833	0,112764686	down	R3	TIP	wet	126	0,912698413	chr02	22563988	MITE/Tourist	chr02	22562006	22562946	-	Heavy metal transport/detoxification protein domain containing protein. (Os02t0585200-01)
indica	TIP_3498	Os01g0361000	OS01T0361000-02	0,015181523	0,524232245	0,112258665	up	R3	TIP	wet	124	0,185483871	chr01	14698199	LTR/Gypsy	chr01	14702436	14705998	-	Conserved hypothetical protein. (Os01t0361000-01);Conserved hypothetical protein. (Os01t0361000-02)
indica	TIP_71809	Os12g0137200	OS12T0137200-01	0,015715232	-0,357100138	0,111713198	down	R3	TIP	wet	126	0,619047619	chr12	1811279	DNAauto/MULE	chr12	1802714	1807513	+	Similar to Saccharopine dehydrogenase family protein, expressed. (Os12t0137200-01)
indica	TIP_30793	Os04g0494300	OS04T0494300-00	0,016343189	-0,572726867	0,111105208	down	R3	TIP	wet	124	0,10483871	chr04	24712398	DNAauto/MULE	chr04	24712259	24717577	+	Hypothetical gene. (Os04t0494300-00)
indica	TIP_41398	Os06g0225300	OS06T0225300-02	0,016559913	-0,171807179	0,110850164	down	R3	TIP	wet	126	0,825396825	chr06	6484782	DNAnona/MULE	chr06	6484167	6488553	-	Similar to SERK1 (Fragment). (Os06t0225300-01);Similar to SERK1 (Fragment). (Os06t0225300-02)
indica	TIP_32047	Os04g0585200	OS04T0585200-01	0,016966558	-0,613885442	0,110445136	down	R3	TIP	wet	126	0,055555556	chr04	29570788	MITE/Tourist	chr04	29565754	29570387	-	Similar to Glutamate receptor. (Os04t0585200-01);Similar to Glutamate receptor 3.1. (Os04t0585200-02)
indica	TIP_55215	Os08g0364900	OS08T0364900-00	0,018219472	0,667658108	0,109363568	up	R3	TIP	wet	126	0,880952381	chr08	16891865	LTR/Copia	chr08	16892349	16896395	+	Similar to Pirin-like protein. (Os08t0364900-00)
indica	TIP_27087	Os03g0850600	OS03T0850600-01	0,018219472	-0,293892206	0,109295788	down	R3	TIP	wet	112	0,696428571	chr03	35803409	MITE/Tourist	chr03	35806060	35808891	-	Similar to Integral membrane protein. (Os03t0850600-01)
indica	TIP_67306	Os11g0140900	OS11T0140900-01	0,018219472	-0,216303551	0,10923643	down	R3	TIP	wet	126	0,547619048	chr11	1888694	DNAnona/hAT	chr11	1887131	1892676	+	Conserved hypothetical protein. (Os11t0140900-01)
indica	TIP_30503	Os04g0469000	OS04T0469000-01	0,018219472	0,466837565	0,109178369	up	R3	TIP	wet	124	0,274193548	chr04	23422612	LTR/Copia	chr04	23422508	23423336	-	Heavy metal-associated isoprenylated plant protein 19, Putative virulence target, Disease resistance (Os04t0469000-01)
indica	TIP_64159	Os10g0365800	OS10T0365800-01	0,018956095	-0,199087927	0,108539447	down	R3	TIP	wet	126	0,626984127	chr10	11414519	DNAnona/hAT	chr10	11414311	11417030	+	Protein of unknown function DUF3615 domain containing protein. (Os10t0365800-01)
indica	TIP_52496	Os07g0693000	OS07T0693000-01	0,018956095	0,452322393	0,108492595	up	R3	TIP	wet	126	0,158730159	chr07	29487389	LTR/Copia	chr07	29484521	29487346	+	Similar to Ser-thr protein kinase (Fragment). (Os07t0693000-01)
indica	TIP_59978	Os09g0391501	OS09T0391501-00	0,019216342	0,465818453	0,108234171	up	R3	TIP	wet	125	0,784	chr09	13533197	MITE/Tourist	chr09	13533833	13534255	+	Hypothetical gene. (Os09t0391501-00)
indica	TIP_44352	Os06g0574200	OS06T0574200-01	0,019865664	-0,137014168	0,107709854	down	R3	TIP	wet	123	0,829268293	chr06	22276978	MITE/Stow	chr06	22271338	22275542	-	Serine/threonine protein kinase-related domain containing protein. (Os06t0574200-01)
indica	TIP_51333	Os07g0601000	OS07T0601000-01	0,021275982	-0,911987993	0,106705166	down	R3	TIP	wet	126	0,936507937	chr07	24518510	MITE/Stow	chr07	24515344	24517707	-	Similar to NADPH HC toxin reductase (Fragment). (Os07t0601000-01)
indica	TIP_29156	Os04g0379900	OS04T0379900-01	0,021410843	-0,356672062	0,106475374	down	R3	TIP	wet	126	0,238095238	chr04	18559927	SINE/unknown	chr04	18560190	18564376	-	Similar to Acyl-[acyl-carrier-protein] desaturase, chloroplast precursor (EC 1.14.19.2) (Stearoyl-ACP desaturase). (Os04t0379900-01)
indica	TIP_29157	Os04g0379900	OS04T0379900-01	0,021410843	-0,356672062	0,106475374	down	R3	TIP	wet	126	0,238095238	chr04	18562388	MITE/Tourist	chr04	18560190	18564376	-	Similar to Acyl-[acyl-carrier-protein] desaturase, chloroplast precursor (EC 1.14.19.2) (Stearoyl-ACP desaturase). (Os04t0379900-01)
indica	TIP_72683	Os12g0210200	OS12T0210200-01	0,022543466	0,485611463	0,105702905	up	R3	TIP	wet	126	0,80952381	chr12	5756511	DNAnona/MULE	chr12	5756479	5760022	+	Zeta class glutathione transferase (Os12t0210200-01)
indica	TIP_52066	Os07g0663600	OS07T0663600-01	0,024068287	-0,240171724	0,104741259	down	R3	TIP	wet	126	0,484126984	chr07	27996655	LTR/Gypsy	chr07	27995955	27997226	+	Short-chain dehydrogenase/reductase SDR domain containing protein. (Os07t0663600-01)
indica	TIP_32658	Os04g0630300	OS04T0630300-01	0,024416567	-0,502414769	0,104474988	down	R3	TIP	wet	126	0,253968254	chr04	32063559	DNAnona/MULE	chr04	32059560	32062390	+	NAD(P)-binding domain containing protein. (Os04t0630300-01)
indica	TIP_2128	Os01g0258600	OS01T0258600-00	0,024425445	0,320325511	0,104399687	up	R3	TIP	wet	125	0,744	chr01	8656782	DNAnona/MULE	chr01	8657066	8658466	+	Plant-specific small protein, Hybrid incompatibility, Pollen germination (Os01t0258600-01)
indica	TIP_67316	Os11g0141800	OS11T0141800-01	0,025024125	-0,1051098	0,104	down	R3	TIP	wet	126	0,928571429	chr11	1946015	DNAnona/CACTA	chr11	1946099	1946770	-	Conserved hypothetical protein. (Os11t0141800-01)
indica	TIP_63	Os01g0105900	OS01T0105900-01	0,025239549	-0,512718553	0,103813623	down	R3	TIP	wet	126	0,174603175	chr01	312684	MITE/Tourist	chr01	309520	313170	-	PfkB carbohydrate kinase protein, Regulation of plant height and leaf structure (Os01t0105900-01)
indica	TIP_58637	Os09g0256100	OS09T0256100-00	0,026629149	0,23758851	0,103014303	up	R3	TIP	wet	125	0,52	chr09	4250407	LTR/TRIM	chr09	4250749	4251832	+	Similar to flavonol 4-sulfotransferase. (Os09t0256100-00)
indica	TIP_18343	Os03g0105401	OS03T0105401-00	0,026653535	-0,16929705	0,102932849	down	R3	TIP	wet	126	0,650793651	chr03	338381	LTR/Gypsy	chr03	324659	337243	+	Hypothetical gene. (Os03t0105401-00)
indica	TIP_66449	Os10g0542266	OS10T0542266-00	0,026655695	-0,194429919	0,10285474	down	R3	TIP	wet	126	0,753968254	chr10	21174385	DNAnona/MULE	chr10	21169727	21172263	+	Hypothetical gene. (Os10t0542266-00)
indica	TIP_25145	Os03g0703000	OS03T0703000-01	0,026655695	-0,16134651	0,102783412	down	R3	TIP	wet	126	0,698412698	chr03	28240375	LTR/Gypsy	chr03	28240368	28245227	-	Similar to Beta-glucosidase. (Os03t0703000-01);Similar to Beta-glucosidase. (Os03t0703000-03)
indica	TIP_51804	Os07g0637150	OS07T0637150-01	0,026655695	0,442536065	0,102726851	up	R3	TIP	wet	126	0,841269841	chr07	26470107	DNAnona/PILE	chr07	26472709	26473116	+	Similar to DnaJ domain containing protein. (Os07t0637150-01)
indica	TIP_9722	Os01g0954000	OS01T0954000-01	0,026717656	-0,411336841	0,102627589	down	R3	TIP	wet	126	0,428571429	chr01	42022119	LTR/Copia	chr01	42018073	42019444	+	NADPH-dependent FMN reductase family protein. (Os01t0954000-01)
indica	TIP_66265	Os10g0528200	OS10T0528200-01	0,026727829	-0,640672356	0,102555107	down	R3	TIP	wet	126	0,912698413	chr10	20554824	DNAnona/hAT	chr10	20553664	20554715	+	Similar to Glutathione S-transferase TSI-1 (EC 2.5.1.18) (Glutathione S- transferase 1). (Os10t0528200-01)
indica	TIP_69623	Os11g0456300	OS11T0456300-02	0,027235049	-0,294515008	0,102231931	down	R3	TIP	wet	126	0,944444444	chr11	15456625	DNAnona/Tourist	chr11	15459465	15462351	+	Similar to SKP1-like protein 1A. (Os11t0456300-01);Similar to SKP1-like protein 1A. (Os11t0456300-02)
indica	TIP_165	Os01g0116900	OS01T0116900-00	0,027370943	-0,450518718	0,10209744	down	R3	TIP	wet	126	0,19047619	chr01	924276	DNAnona/CACTA	chr01	924451	956639	+	Protein kinase, catalytic domain domain containing protein. (Os01t0116900-00)
indica	TIP_67604	Os11g0162700	OS11T0162700-02	0,027441544	0,154072722	0,101995995	up	R3	TIP	wet	125	0,272	chr11	3058100	DNAnona/Helitron	chr11	3058267	3062680	-	Hypothetical conserved gene. (Os11t0162700-01);Hypothetical conserved gene. (Os11t0162700-02)
indica	TIP_4852	Os01g0581300	OS01T0581300-01	0,02803393	0,352892205	0,101638819	up	R3	TIP	wet	126	0,5	chr01	22535541	SINE/unknown	chr01	22535013	22538645	+	Lycopene epsilon-cyclase (Os01t0581300-01)
indica	TIP_30774	Os04g0493000	OS04T0493000-01	0,028371559	0,3638634	0,101409881	up	R3	TIP	wet	126	0,904761905	chr04	24647907	DNAauto/MULE	chr04	24648004	24648863	-	Similar to H0425E08.14 protein. (Os04t0493000-01)
indica	TIP_52059	Os07g0662900	OS07T0662900-01	0,02924643	-0,273957972	0,100930308	down	R3	TIP	wet	126	0,428571429	chr07	27970596	MITE/Stow	chr07	27960583	27968015	+	Similar to 4-alpha-glucanotransferase (EC 2.4.1.25). (Os07t0662900-01)
indica	TIP_16686	Os02g0704600	OS02T0704600-01	0,029537737	0,350042199	0,10070462	up	R3	TIP	wet	126	0,301587302	chr02	29067789	SINE/unknown	chr02	29072649	29076395	-	Conserved hypothetical protein. (Os02t0704600-01)
indica	TIP_41202	Os06g0211300	OS06T0211300-01	0,029537737	0,358580083	0,100665217	up	R3	TIP	wet	126	0,531746032	chr06	5689446	DNAnona/Helitron	chr06	5688697	5690594	+	Short-chain dehydrogenase/reductase SDR domain containing protein. (Os06t0211300-01)
indica	TIP_67863	Os11g0183900	OS11T0183900-02	0,029764333	0,126702208	0,10049647	up	R3	TIP	wet	126	0,119047619	chr11	4248239	MITE/Tourist	chr11	4247310	4251716	+	Similar to Aspartic proteinase Asp1 precursor (EC 3.4.23.-) (OsAsp1) (Nucellin- like protein). (Os11t0183900-01);Similar to Nucellin-like aspartic protease (Fragment). (Os11t0183900-02)
indica	TIP_65149	Os10g0445400	OS10T0445400-01	0,029785696	-0,179585015	0,100386885	down	R3	TIP	wet	126	0,563492063	chr10	16085194	DNAnona/Helitron	chr10	16084478	16086689	-	RING finger E3 ligase, Mediation of nuclear-cytoplasmic trafficking of nuclear substrate proteins via monoubiquitination, Regulation of heat-generated signal, Negative regulation of leaf inclination, Modulation of brassinosteroid signaling (Os10t0445400-01)
indica	TIP_55752	Os08g0414600	OS08T0414600-01	0,029785696	0,239552836	0,100358583	up	R3	TIP	wet	118	0,36440678	chr08	19822712	DNAnona/hAT	chr08	19826775	19829667	+	Six-bladed beta-propeller, TolB-like domain containing protein. (Os08t0414600-01)
indica	TIP_74525	Os12g0527301	OS12T0527301-00	0,02987102	0,261629257	0,100255951	up	R3	TIP	wet	126	0,515873016	chr12	20783714	DNAauto/MULE	chr12	20781339	20781923	+	Hypothetical gene. (Os12t0527301-00)
indica	TIP_31267	Os04g0530300	OS04T0530300-01	0,03064298	-0,43078589	0,099751937	down	R3	TIP	wet	126	0,857142857	chr04	26522591	MITE/Stow	chr04	26524261	26528367	-	Similar to OSIGBa0155K17.11 protein. (Os04t0530300-01)
indica	TIP_59918	Os09g0382500	OS09T0382500-01	0,03064298	0,383131555	0,099740445	up	R3	TIP	wet	125	0,176	chr09	12983244	DNAnona/MULE	chr09	12977799	12980466	-	Conserved hypothetical protein. (Os09t0382500-01)
indica	TIP_26970	Os03g0839100	OS03T0839100-01	0,03064298	0,356387975	0,099718703	up	R3	TIP	wet	122	0,680327869	chr03	35261459	DNAnona/MULE	chr03	35259526	35264535	-	Ubiquinone biosynthesis hydroxylase, UbiH/UbiF/VisC/COQ6 domain containing protein. (Os03t0839100-01)
indica	TIP_73411	Os12g0291733	OS12T0291733-00	0,030836906	0,553796905	0,099570142	up	R3	TIP	wet	126	0,142857143	chr12	11278438	MITE/Stow	chr12	11277307	11278105	-	Hypothetical gene. (Os12t0291733-00)
indica	TIP_46627	Os07g0110900	OS07T0110900-01	0,031599137	0,432415242	0,099174663	up	R3	TIP	wet	108	0,638888889	chr07	606924	MITE/Tourist	chr07	607685	608602	+	Conserved hypothetical protein. (Os07t0110900-01)
indica	TIP_50987	Os07g0573800	OS07T0573800-02	0,032741997	-0,454348077	0,098627674	down	R3	TIP	wet	126	0,182539683	chr07	23194375	DNAnona/MULE	chr07	23194229	23199780	-	Similar to root border cell-specific protein. (Os07t0573800-01);FMN-binding split barrel domain containing protein. (Os07t0573800-02);FMN-binding split barrel domain containing protein. (Os07t0573800-03);Hypothetical protein. (Os07t0573800-04)
indica	TIP_224	Os01g0122000	OS01T0122000-01	0,033209169	-0,240462626	0,098372558	down	R3	TIP	wet	126	0,285714286	chr01	1251277	MITE/Tourist	chr01	1249881	1251421	+	Conserved hypothetical protein. (Os01t0122000-01)
indica	TIP_59620	Os09g0361300	OS09T0361300-01	0,036023811	-0,389120289	0,097199841	down	R3	TIP	wet	126	0,80952381	chr09	11800598	DNAnona/hAT	chr09	11799226	11800571	-	F-box domain, cyclin-like domain containing protein. (Os09t0361300-01)
indica	TIP_63029	Os10g0155500	OS10T0155500-01	0,036552795	-0,273901585	0,096939499	down	R3	TIP	wet	126	0,349206349	chr10	3477168	LTR/Gypsy	chr10	3475597	3478195	-	Similar to Aldose 1-epimerase-like protein. (Os10t0155500-01)
indica	TIP_5273	Os01g0611300	OS01T0611300-01	0,036609039	-0,136742406	0,096857613	down	R3	TIP	wet	126	0,642857143	chr01	24196234	DNAnona/MULE	chr01	24195504	24196616	+	Similar to Metal tolerance protein 7. (Os01t0611300-01)
indica	TIP_32759	Os04g0640800	OS04T0640800-01	0,037319927	-0,236827416	0,096534149	down	R3	TIP	wet	126	0,523809524	chr04	32605701	DNAnona/MULE	chr04	32600395	32603306	+	Programmed cell death protein 2, C-terminal domain containing protein. (Os04t0640800-01)
indica	TIP_45763	Os06g0672700	OS06T0672700-01	0,037786448	0,455547207	0,096303987	up	R3	TIP	wet	126	0,182539683	chr06	27925175	DNAnona/hAT	chr06	27923541	27926280	-	Conserved hypothetical protein. (Os06t0672700-01)
indica	TIP_30211	Os04g0447500	OS04T0447500-01	0,040003448	-0,444493625	0,09546435	down	R3	TIP	wet	126	0,968253968	chr04	22321710	LTR/Copia	chr04	22316723	22319604	+	Similar to NADPH-dependent codeinone reductase (EC 1.1.1.247). (Os04t0447500-01)
indica	TIP_59518	Os09g0345300	OS09T0345300-01	0,040755907	-0,211247272	0,095149643	down	R3	TIP	wet	126	0,420634921	chr09	10791642	LTR/Copia	chr09	10785144	10793869	+	Similar to Receptor-like serine/threonine kinase. (Os09t0345300-01)
indica	TIP_28710	Os04g0338100	OS04T0338100-01	0,044254338	0,817197898	0,0939634	up	R3	TIP	wet	122	0,926229508	chr04	15929129	MITE/Stow	chr04	15924375	15928109	+	Similar to IN2-2 protein. (Os04t0338100-01)
indica	TIP_22136	Os03g0386000	OS03T0386000-01	0,046379477	0,430992694	0,093262092	up	R3	TIP	wet	117	0,213675214	chr03	15330497	MITE/Tourist	chr03	15329520	15334903	+	Similar to Salt-responsive WD40 protein 5. (Os03t0386000-01);WD40 subfamily protein, Salt stress (Os03t0386000-02)
indica	TIP_15728	Os02g0632800	OS02T0632800-01	0,047919075	0,320657862	0,092739827	up	R3	TIP	wet	122	0,532786885	chr02	25350618	DNAnona/MULE	chr02	25348252	25351744	-	Wall-associated kinase, Positive regulation of rice blast resistance (Os02t0632800-01)
indica	TIP_66265	Os10g0528300	OS10T0528300-01	0,047919075	-0,46295034	0,092697012	down	R3	TIP	wet	126	0,912698413	chr10	20554824	DNAnona/hAT	chr10	20556396	20557613	+	Tau class glutathione S-transferase 4 (Os10t0528300-01)
indica	TIP_43100	Os06g0476200	OS06T0476200-01	0,048592868	0,42183858	0,092447189	up	R3	TIP	wet	126	0,507936508	chr06	16010351	LTR/Copia	chr06	16011333	16032779	+	Similar to Phosphoglucomutase precursor (EC 5.4.2.2). (Os06t0476200-01);Similar to predicted protein. (Os06t0476200-02)
indica	TIP_73519	Os12g0409000	OS12T0409000-01	0,049133853	0,391525255	0,092237188	up	R3	TIP	wet	126	0,841269841	chr12	12390809	MITE/Tourist	chr12	12392759	12396626	-	Similar to Serine hydroxymethyltransferase. (Os12t0409000-01)
indica	TIP_73631	Os12g0421000	OS12T0421000-01	0,049701833	0,353723844	0,092021637	up	R3	TIP	wet	126	0,531746032	chr12	13173986	MITE/Stow	chr12	13177329	13178929	+	Similar to Barley stem rust resistance protein. (Os12t0421000-01)
indica	TIP_24227	Os03g0644200	OS03T0644200-01	0,049866979	0,337771616	0,091918297	up	R3	TIP	wet	126	0,722222222	chr03	24840829	MITE/Stow	chr03	24843343	24845622	-	Pentatricopeptide repeat domain containing protein. (Os03t0644200-01)
indica	TIP_28891	Os04g0352400	OS04T0352400-01	0,049869341	0,464503113	0,091859981	up	R3	TIP	wet	126	0,817460317	chr04	16814964	DNAnona/MULE	chr04	16813905	16817974	-	FK506-binding protein, Peptidyl-prolyl cis/trans isomerase, Chilling tolerance (Os04t0352400-01)
indica	TIP_75781	Os12g0628100	OS12T0628100-01	2,57673E-23	-2,806131157	0,617419647	down	R1	TIP	dry	126	0,896825397	chr12	26892919	MITE/Tourist	chr12	26888810	26890166	-	Similar to Actin-depolymerizing factor 6 (ADF-6) (AtADF6). (Os12t0628100-01)
indica	TIP_3390	Os01g0352100	OS01T0352100-01	1,96301E-22	-1,840804515	0,600326275	down	R1	TIP	dry	126	0,73015873	chr01	14098954	LINE/unknown	chr01	14101994	14108083	+	2OG-Fe(II) oxygenase domain containing protein. (Os01t0352100-01)
indica	TIP_40623	Os06g0159900	OS06T0159900-01	7,64066E-19	0,741351573	0,540700544	up	R1	TIP	dry	126	0,238095238	chr06	3059828	MITE/Stow	chr06	3051248	3055005	+	Similar to Arm repeat containing protein. (Os06t0159900-01)
indica	TIP_3391	Os01g0352100	OS01T0352100-01	1,29804E-18	-1,667968881	0,534644389	down	R1	TIP	dry	126	0,69047619	chr01	14102762	DNAnona/Helitron	chr01	14101994	14108083	+	2OG-Fe(II) oxygenase domain containing protein. (Os01t0352100-01)
indica	TIP_19871	Os03g0219200	OS03T0219200-01	2,62956E-18	-0,952787784	0,52766685	down	R1	TIP	dry	126	0,111111111	chr03	6275388	DNAnona/MULE	chr03	6271895	6275386	-	CuZn superoxide dismutase, Response to salinity, drought, and oxidative stress (Os03t0219200-01)
indica	TIP_70824	Os11g0595200	OS11T0595200-01	6,48217E-18	-1,457992224	0,519391163	down	R1	TIP	dry	126	0,603174603	chr11	22661298	DNAnona/MULE	chr11	22660534	22662341	+	PAP fibrillin family protein. (Os11t0595200-01)
indica	TIP_41765	Os06g0254600	OS06T0254600-01	1,53904E-17	-1,145583624	0,511486736	down	R1	TIP	dry	126	0,46031746	chr06	7995374	MITE/Tourist	chr06	7996917	8004842	-	Caleosin related family protein. (Os06t0254600-01)
indica	TIP_49742	Os07g0475000	OS07T0475000-01	6,51749E-14	-1,076703004	0,440496952	down	R1	TIP	dry	126	0,150793651	chr07	17140585	LTR/Copia	chr07	17136166	17144612	+	Conserved hypothetical protein. (Os07t0475000-01)
indica	TIP_40475	Os06g0146800	OS06T0146800-01	2,57593E-13	-0,653062194	0,427007377	down	R1	TIP	dry	125	0,896	chr06	2453895	MITE/Tourist	chr06	2449205	2449822	-	Conserved hypothetical protein. (Os06t0146800-01)
indica	TIP_41619	Os06g0241100	OS06T0241100-01	3,33516E-13	0,564217163	0,423671678	up	R1	TIP	dry	119	0,277310924	chr06	7329511	DNAnona/MULE	chr06	7325616	7327449	-	Membrane-associated kinase-5, Response to drought stress in tolerant genotype, Response to submergence (Os06t0241100-01)
indica	TIP_20554	Os03g0269900	OS03T0269900-01	7,52046E-13	0,791289326	0,41525642	up	R1	TIP	dry	126	0,642857143	chr03	9020009	DNAnona/unknown	chr03	9011629	9016463	+	Protein of unknown function DUF604 family protein. (Os03t0269900-01)
indica	TIP_39336	Os05g0546300	OS05T0546300-01	1,26274E-12	0,506612535	0,409583252	up	R1	TIP	dry	126	0,293650794	chr05	27121709	MITE/Tourist	chr05	27119121	27120202	+	Hypothetical protein. (Os05t0546300-01)
indica	TIP_70825	Os11g0595200	OS11T0595200-01	1,58099E-12	-1,262407038	0,406705886	down	R1	TIP	dry	126	0,5	chr11	22662221	MITE/Tourist	chr11	22660534	22662341	+	PAP fibrillin family protein. (Os11t0595200-01)
indica	TIP_46611	Os07g0109700	OS07T0109700-01	1,69532E-12	-1,202619098	0,405342528	down	R1	TIP	dry	126	0,126984127	chr07	537085	LTR/Gypsy	chr07	536836	537792	-	Conserved hypothetical protein. (Os07t0109700-01)
indica	TIP_543	Os01g0152700	OS01T0152700-01	2,2819E-12	0,883466592	0,401860574	up	R1	TIP	dry	126	0,682539683	chr01	2839521	LINE/unknown	chr01	2837892	2838171	-	Similar to Histone H2B (CaH2B). (Os01t0152700-01)
indica	TIP_58769	Os09g0270900	OS09T0270900-02	4,08608E-12	0,651565184	0,395403454	up	R1	TIP	dry	119	0,218487395	chr09	5312050	LTR/Gypsy	chr09	5306896	5309044	-	BolA-like protein domain containing protein. (Os09t0270900-01);Similar to EMB1374. (Os09t0270900-02)
indica	TIP_24692	Os03g0673600	OS03T0673600-01	4,08608E-12	-1,553053785	0,395073552	down	R1	TIP	dry	126	0,682539683	chr03	26616395	MITE/Tourist	chr03	26617086	26618211	-	Conserved hypothetical protein. (Os03t0673600-01)
indica	TIP_39334	Os05g0546300	OS05T0546300-01	4,62796E-12	0,492651871	0,393319193	up	R1	TIP	dry	126	0,301587302	chr05	27119972	DNAauto/MULE	chr05	27119121	27120202	+	Hypothetical protein. (Os05t0546300-01)
indica	TIP_542	Os01g0152700	OS01T0152700-01	5,19549E-12	-0,898715985	0,391675708	down	R1	TIP	dry	126	0,285714286	chr01	2837603	SINE/unknown	chr01	2837892	2838171	-	Similar to Histone H2B (CaH2B). (Os01t0152700-01)
indica	TIP_47761	Os07g0196200	OS07T0196200-01	1,74301E-11	-1,31941915	0,379323659	down	R1	TIP	dry	126	0,373015873	chr07	5219381	DNAauto/MULE	chr07	5216029	5217014	-	Protein of unknown function DUF3252 domain containing protein. (Os07t0196200-01)
indica	TIP_26201	Os03g0774600	OS03T0774600-01	2,33947E-11	1,209094947	0,375922917	up	R1	TIP	dry	126	0,920634921	chr03	32108992	DNAnona/MULE	chr03	32113298	32113796	+	Conserved hypothetical protein. (Os03t0774600-01)
indica	TIP_64322	Os10g0378100	OS10T0378100-01	7,81403E-11	-0,955239736	0,363354753	down	R1	TIP	dry	126	0,214285714	chr10	12094053	DNAauto/CACTA	chr10	12090264	12098560	-	Similar to Cytochrome P450 family protein, expressed. (Os10t0378100-01)
indica	TIP_36305	Os05g0320800	OS05T0320800-01	2,07596E-10	-0,47014727	0,352923891	down	R1	TIP	dry	126	0,841269841	chr05	14903317	MITE/Tourist	chr05	14906587	14907252	+	Hypothetical protein. (Os05t0320800-01)
indica	TIP_3392	Os01g0352100	OS01T0352100-01	3,39304E-10	-1,266342651	0,347407488	down	R1	TIP	dry	126	0,595238095	chr01	14103644	DNAnona/Helitron	chr01	14101994	14108083	+	2OG-Fe(II) oxygenase domain containing protein. (Os01t0352100-01)
indica	TIP_1416	Os01g0214400	OS01T0214400-01	4,82711E-10	-0,758524768	0,343314206	down	R1	TIP	dry	126	0,285714286	chr01	6253685	MITE/Stow	chr01	6253793	6256906	+	Similar to predicted protein. (Os01t0214400-01)
indica	TIP_49904	Os07g0486500	OS07T0486500-02	2,14764E-09	-0,550634889	0,327136761	down	R1	TIP	dry	126	0,484126984	chr07	17912109	MITE/Tourist	chr07	17907341	17912298	+	RhoGAP domain containing protein. (Os07t0486500-01);RhoGAP domain containing protein. (Os07t0486500-02)
indica	TIP_53493	Os08g0174100	OS08T0174100-00	3,65408E-09	-0,546068638	0,321029354	down	R1	TIP	dry	126	0,888888889	chr08	4318661	LTR/Copia	chr08	4316104	4318545	-	Similar to transferase family protein. (Os08t0174100-00)
indica	TIP_24695	Os03g0673600	OS03T0673600-01	3,9852E-09	1,469480913	0,319701524	up	R1	TIP	dry	124	0,274193548	chr03	26618960	DNAnona/hAT	chr03	26617086	26618211	-	Conserved hypothetical protein. (Os03t0673600-01)
indica	TIP_60553	Os09g0428900	OS09T0428900-01	5,72615E-09	0,968919301	0,315396781	up	R1	TIP	dry	112	0,071428571	chr09	15587803	LINE/unknown	chr09	15583194	15586475	+	Similar to Conserved protein. (Os09t0428900-01)
indica	TIP_53604	Os08g0183900	OS08T0183900-01	5,94716E-09	-0,880346523	0,314616871	down	R1	TIP	dry	126	0,126984127	chr08	4898051	DNAnona/unknown	chr08	4897613	4900341	-	Similar to dihydroflavonol-4-reductase. (Os08t0183900-01)
indica	TIP_16476	Os02g0687900	OS02T0687900-01	7,44952E-09	-1,224769131	0,311806039	down	R1	TIP	dry	126	0,896825397	chr02	28212452	DNAnona/CACTA	chr02	28212163	28216943	+	Peptidase S10, serine carboxypeptidase family protein. (Os02t0687900-01)
indica	TIP_70449	Os11g0539600	OS11T0539600-00	8,32566E-09	0,489734659	0,310244186	up	R1	TIP	dry	123	0,170731707	chr11	19696468	DNAnona/hAT	chr11	19701215	19702758	-	Conserved hypothetical protein. (Os11t0539600-00)
indica	TIP_53901	Os08g0227200	OS08T0227200-02	1,40143E-08	0,41753895	0,304186635	up	R1	TIP	dry	126	0,349206349	chr08	7756290	DNAnona/hAT	chr08	7760699	7762222	-	Kelch related domain containing protein. (Os08t0227200-02)
indica	TIP_38559	Os05g0488000	OS05T0488000-01	2,23909E-08	-0,683266146	0,298668847	down	R1	TIP	dry	126	0,761904762	chr05	23996139	DNAnona/MULE	chr05	23996148	23997293	+	Peptidase C1A, papain family protein. (Os05t0488000-01)
indica	TIP_28709	Os04g0338100	OS04T0338100-01	2,62408E-08	-0,547326137	0,296580818	down	R1	TIP	dry	126	0,436507937	chr04	15927749	LTR/Copia	chr04	15924375	15928109	+	Similar to IN2-2 protein. (Os04t0338100-01)
indica	TIP_74525	Os12g0527301	OS12T0527301-00	3,13788E-08	0,532103082	0,294270838	up	R1	TIP	dry	126	0,515873016	chr12	20783714	DNAauto/MULE	chr12	20781339	20781923	+	Hypothetical gene. (Os12t0527301-00)
indica	TIP_16897	Os02g0721100	OS02T0721100-01	4,9105E-08	0,545954936	0,288813451	up	R1	TIP	dry	126	0,198412698	chr02	29918000	DNAauto/MULE	chr02	29919262	29920338	-	Similar to E2 ubiquitin-conjugating enzyme UbcH5B (Fragment). (Os02t0721100-01)
indica	TIP_2555	Os01g0286100	OS01T0286100-01	4,9105E-08	-0,795155467	0,288640035	down	R1	TIP	dry	126	0,238095238	chr01	10275976	LTR/Gypsy	chr01	10271157	10274304	-	Phytochrome-interacting factor-like protein, Basic helix-loop-helix factor, Repression of seedling growth in the dark (Os01t0286100-01)
indica	TIP_15311	Os02g0600200	OS02T0600200-01	5,07798E-08	-0,59615932	0,287969562	down	R1	TIP	dry	126	0,174603175	chr02	23466166	MITE/Tourist	chr02	23465969	23468038	-	IQ calmodulin-binding region domain containing protein. (Os02t0600200-01);Similar to predicted protein. (Os02t0600200-02)
indica	TIP_2107	Os01g0256500	OS01T0256500-02	5,68436E-08	2,137373462	0,286411179	up	R1	TIP	dry	110	0,909090909	chr01	8542846	MITE/Stow	chr01	8546065	8546869	-	Similar to ZnI. (Os01t0256500-02)
indica	TIP_58942	Os09g0287500	OS09T0287500-01	5,76462E-08	-0,671207955	0,285973814	down	R1	TIP	dry	125	0,688	chr09	6437899	DNAnona/Helitron	chr09	6439640	6441905	-	Protein of unknown function DUF565 family protein. (Os09t0287500-01)
indica	TIP_72732	Os12g0226400	OS12T0226400-00	6,20418E-08	0,464630406	0,284870307	up	R1	TIP	dry	126	0,365079365	chr12	6886206	DNAnona/POLE	chr12	6889996	6896735	+	Similar to 2-alkenal reductase. (Os12t0226400-00)
indica	TIP_44232	Os06g0564500	OS06T0564500-01	7,12839E-08	-1,142729879	0,28303031	down	R1	TIP	dry	123	0,918699187	chr06	21705452	DNAnona/Tourist	chr06	21700599	21703282	-	Cysteine synthase (EC 4.2.99.8). (Os06t0564500-01)
indica	TIP_61206	Os09g0470500	OS09T0470500-01	7,16636E-08	-0,736133788	0,282709179	down	R1	TIP	dry	126	0,23015873	chr09	17909769	MITE/Tourist	chr09	17903166	17904869	+	Homeodomain-leucine zipper (HD-Zip) protein, Regulation of gibberellin signaling (Os09t0470500-01)
indica	TIP_63074	Os10g0159800	OS10T0159800-04	1,31129E-07	0,624104871	0,275564118	up	R1	TIP	dry	126	0,595238095	chr10	3798513	DNAnona/Helitron	chr10	3793940	3803819	-	Alcohol dehydrogenase superfamily, zinc-containing protein. (Os10t0159800-01);Similar to Alcohol dehydrogenase 2. (Os10t0159800-03);Similar to Alcohol dehydrogenase 2. (Os10t0159800-04)
indica	TIP_72733	Os12g0226400	OS12T0226400-00	2,22421E-07	-0,455973486	0,268986089	down	R1	TIP	dry	126	0,650793651	chr12	6889433	LTR/Gypsy	chr12	6889996	6896735	+	Similar to 2-alkenal reductase. (Os12t0226400-00)
indica	TIP_72734	Os12g0226400	OS12T0226400-00	2,22421E-07	-0,455973486	0,268986089	down	R1	TIP	dry	126	0,650793651	chr12	6890512	LTR/Gypsy	chr12	6889996	6896735	+	Similar to 2-alkenal reductase. (Os12t0226400-00)
indica	TIP_72761	Os12g0228800	OS12T0228800-01	3,45112E-07	0,475611319	0,263650627	up	R1	TIP	dry	126	0,055555556	chr12	7011488	MITE/Stow	chr12	7014180	7014828	-	Similar to Calmodulin-like protein. (Os12t0228800-01)
indica	TIP_66361	Os10g0536100	OS10T0536100-01	1,24942E-06	1,404763444	0,24830415	up	R1	TIP	dry	124	0,89516129	chr10	20863697	DNAauto/PILE	chr10	20863187	20873635	+	MIKC-type MADS-box protein, Long day (LD)-specific negative regulator of flowering (Os10t0536100-01)
indica	TIP_67392	Os11g0150800	OS11T0150800-01	1,2764E-06	0,301819822	0,247811351	up	R1	TIP	dry	124	0,072580645	chr11	2363757	DNAnona/MULEtir	chr11	2363882	2364482	+	Hypothetical protein. (Os11t0150800-01)
indica	TIP_98	Os01g0108400	OS01T0108400-00	1,49459E-06	-0,626710421	0,245702531	down	R1	TIP	dry	126	0,587301587	chr01	457422	MITE/Stow	chr01	455707	457425	+	Helix-loop-helix DNA-binding domain containing protein. (Os01t0108400-00)
indica	TIP_53491	Os08g0174100	OS08T0174100-00	1,93819E-06	0,490434376	0,242375061	up	R1	TIP	dry	125	0,104	chr08	4313658	MITE/Stow	chr08	4316104	4318545	-	Similar to transferase family protein. (Os08t0174100-00)
indica	TIP_61803	Os09g0517000	OS09T0517000-01	1,9695E-06	0,761442712	0,241956298	up	R1	TIP	dry	126	0,841269841	chr09	20157583	MITE/Stow	chr09	20156455	20157191	+	Conserved hypothetical protein. (Os09t0517000-01)
indica	TIP_27051	Os03g0846400	OS03T0846400-01	2,46576E-06	-1,014343875	0,238824352	down	R1	TIP	dry	126	0,126984127	chr03	35585064	DNAnona/hAT	chr03	35589787	35596069	+	Peptidase, trypsin-like serine and cysteine domain containing protein. (Os03t0846400-01)
indica	TIP_27055	Os03g0846400	OS03T0846400-01	2,46576E-06	-1,014343875	0,238824352	down	R1	TIP	dry	126	0,126984127	chr03	35595754	DNAauto/MULE	chr03	35589787	35596069	+	Peptidase, trypsin-like serine and cysteine domain containing protein. (Os03t0846400-01)
indica	TIP_14359	Os02g0533800	OS02T0533800-01	2,59956E-06	-0,559271545	0,237974489	down	R1	TIP	dry	125	0,592	chr02	19649688	MITE/Tourist	chr02	19648496	19649478	-	Similar to ATPase inhibitor. (Os02t0533800-01)
indica	TIP_46627	Os07g0110800	OS07T0110800-01	2,70077E-06	0,807452303	0,237303525	up	R1	TIP	dry	108	0,638888889	chr07	606924	MITE/Tourist	chr07	604586	607425	-	Conserved hypothetical protein. (Os07t0110800-01)
indica	TIP_62380	Os09g0560800	OS09T0560800-01	3,01027E-06	-0,515081145	0,235790456	down	R1	TIP	dry	126	0,76984127	chr09	22284693	MITE/Stow	chr09	22281491	22284167	+	Molybdenum cofactor sulfurase, C-terminal domain containing protein. (Os09t0560800-01)
indica	TIP_75580	Os12g0615400	OS12T0615400-01	3,21508E-06	-0,24300823	0,234792319	down	R1	TIP	dry	126	0,293650794	chr12	26103760	MITE/Stow	chr12	26101180	26103543	-	Similar to 37 kDa inner envelope membrane protein, chloroplast precursor (E37). (Os12t0615400-01)
indica	TIP_40866	Os06g0185900	OS06T0185900-01	3,62828E-06	-1,111917728	0,233132001	down	R1	TIP	dry	118	0,06779661	chr06	4320286	MITE/Tourist	chr06	4321654	4325071	+	Similar to Glutathione peroxidase. (Os06t0185900-01)
indica	TIP_3413	Os01g0355800	OS01T0355800-00	4,06739E-06	0,412532407	0,231552356	up	R1	TIP	dry	124	0,080645161	chr01	14322251	MITE/Stow	chr01	14326183	14327100	+	Similar to Esterase PIR7A. (Os01t0355800-00)
indica	TIP_4852	Os01g0581300	OS01T0581300-01	6,96954E-06	0,498370135	0,224818152	up	R1	TIP	dry	126	0,5	chr01	22535541	SINE/unknown	chr01	22535013	22538645	+	Lycopene epsilon-cyclase (Os01t0581300-01)
indica	TIP_40867	Os06g0185900	OS06T0185900-01	7,28935E-06	-1,087599904	0,224076178	down	R1	TIP	dry	126	0,063492063	chr06	4322394	DNAnona/Helitron	chr06	4321654	4325071	+	Similar to Glutathione peroxidase. (Os06t0185900-01)
indica	TIP_29156	Os04g0379900	OS04T0379900-01	9,75153E-06	-0,573583115	0,220137086	down	R1	TIP	dry	126	0,238095238	chr04	18559927	SINE/unknown	chr04	18560190	18564376	-	Similar to Acyl-[acyl-carrier-protein] desaturase, chloroplast precursor (EC 1.14.19.2) (Stearoyl-ACP desaturase). (Os04t0379900-01)
indica	TIP_29157	Os04g0379900	OS04T0379900-01	9,75153E-06	-0,573583115	0,220137086	down	R1	TIP	dry	126	0,238095238	chr04	18562388	MITE/Tourist	chr04	18560190	18564376	-	Similar to Acyl-[acyl-carrier-protein] desaturase, chloroplast precursor (EC 1.14.19.2) (Stearoyl-ACP desaturase). (Os04t0379900-01)
indica	TIP_50987	Os07g0573800	OS07T0573800-02	1,04402E-05	-0,598173791	0,219113523	down	R1	TIP	dry	126	0,182539683	chr07	23194375	DNAnona/MULE	chr07	23194229	23199780	-	Similar to root border cell-specific protein. (Os07t0573800-01);FMN-binding split barrel domain containing protein. (Os07t0573800-02);FMN-binding split barrel domain containing protein. (Os07t0573800-03);Hypothetical protein. (Os07t0573800-04)
indica	TIP_29623	Os04g0405401	OS04T0405401-01	1,19618E-05	0,31324546	0,217258381	up	R1	TIP	dry	120	0,2	chr04	20119077	DNAnona/Helitron	chr04	20117097	20119136	-	Hypothetical conserved gene. (Os04t0405401-01)
indica	TIP_70450	Os11g0539600	OS11T0539600-00	1,23681E-05	-0,325092209	0,216665528	down	R1	TIP	dry	115	0,6	chr11	19703784	MITE/Tourist	chr11	19701215	19702758	-	Conserved hypothetical protein. (Os11t0539600-00)
indica	TIP_1586	Os01g0224166	OS01T0224166-00	1,23813E-05	0,695026318	0,216472813	up	R1	TIP	dry	126	0,111111111	chr01	6825901	DNAnona/MULE	chr01	6828512	6829334	+	Hypothetical gene. (Os01t0224166-00)
indica	TIP_1781	Os01g0235100	OS01T0235100-01	1,60422E-05	0,327708627	0,213102942	up	R1	TIP	dry	123	0,699186992	chr01	7457221	DNAnona/MULE	chr01	7457835	7459834	+	Similar to predicted protein. (Os01t0235100-01)
indica	TIP_24695	Os03g0673700	OS03T0673700-01	1,702E-05	0,569849223	0,212196708	up	R1	TIP	dry	124	0,274193548	chr03	26618960	DNAnona/hAT	chr03	26622941	26623429	+	Similar to predicted protein. (Os03t0673700-01)
indica	TIP_59883	Os09g0380400	OS09T0380400-01	1,82797E-05	0,597865388	0,211140574	up	R1	TIP	dry	126	0,785714286	chr09	12837802	DNAnona/MULE	chr09	12833971	12834961	+	Conserved hypothetical protein. (Os09t0380400-01)
indica	TIP_66265	Os10g0528150	OS10T0528150-01	2,26189E-05	-0,40695747	0,208329675	down	R1	TIP	dry	126	0,912698413	chr10	20554824	DNAnona/hAT	chr10	20553611	20554584	-	Hypothetical protein. (Os10t0528150-01)
indica	TIP_12283	Os02g0278400	OS02T0278400-01	3,32661E-05	0,250088237	0,203358543	up	R1	TIP	dry	125	0,216	chr02	10269648	DNAnona/MULE	chr02	10262000	10268672	+	Cytochrome P450 family protein. (Os02t0278400-01);Similar to Cytochrome P450 monooxygenase CYP71U4v2. (Os02t0278400-02)
indica	TIP_63	Os01g0105900	OS01T0105900-01	3,56651E-05	-0,660272181	0,202321262	down	R1	TIP	dry	126	0,174603175	chr01	312684	MITE/Tourist	chr01	309520	313170	-	PfkB carbohydrate kinase protein, Regulation of plant height and leaf structure (Os01t0105900-01)
indica	TIP_27085	Os03g0850400	OS03T0850400-01	3,63662E-05	0,587523776	0,201912413	up	R1	TIP	dry	126	0,333333333	chr03	35791186	MITE/Stow	chr03	35790044	35795425	+	Similar to Aspartokinase. (Os03t0850400-01)
indica	TIP_32055	Os04g0585700	OS04T0585700-01	4,1354E-05	-0,570287768	0,200140525	down	R1	TIP	dry	126	0,198412698	chr04	29592939	MITE/Tourist	chr04	29588252	29590515	-	Protein of unknown function DUF581 family protein. (Os04t0585700-01)
indica	TIP_544	Os01g0152900	OS01T0152900-00	4,67189E-05	-0,46181223	0,198449546	down	R1	TIP	dry	126	0,301587302	chr01	2844146	MITE/Tourist	chr01	2844503	2845212	-	Similar to Histone H2B.1. (Os01t0152900-00)
indica	TIP_67485	Os11g0155600	OS11T0155600-01	5,10367E-05	-0,645699305	0,197179648	down	R1	TIP	dry	126	0,246031746	chr11	2606655	MITE/Tourist	chr11	2605752	2614119	-	Conserved hypothetical protein. (Os11t0155600-01)
indica	TIP_47231	Os07g0162500	OS07T0162500-02	5,22367E-05	0,547059306	0,196729464	up	R1	TIP	dry	125	0,864	chr07	3344555	DNAnona/MULE	chr07	3342219	3343596	-	Alpha/beta hydrolase fold-3 domain containing protein. (Os07t0162500-02)
indica	TIP_60	Os01g0105900	OS01T0105900-01	5,39027E-05	-0,662269662	0,196163328	down	R1	TIP	dry	126	0,166666667	chr01	305239	DNAauto/MLE	chr01	309520	313170	-	PfkB carbohydrate kinase protein, Regulation of plant height and leaf structure (Os01t0105900-01)
indica	TIP_18916	Os03g0149200	OS03T0149200-01	5,39027E-05	0,49015228	0,196024102	up	R1	TIP	dry	126	0,166666667	chr03	2739049	MITE/Tourist	chr03	2739653	2743118	-	HR-like lesion-inducer family protein. (Os03t0149200-01)
indica	TIP_50501	Os07g0534000	OS07T0534000-01	5,57882E-05	0,555275345	0,195288112	up	R1	TIP	dry	126	0,19047619	chr07	20937080	MITE/Stow	chr07	20936091	20941652	+	Similar to permeases of the major facilitator superfamily. (Os07t0534000-01)
indica	TIP_50502	Os07g0534000	OS07T0534000-01	5,57882E-05	-0,555275345	0,195288112	down	R1	TIP	dry	126	0,80952381	chr07	20938340	MITE/Tourist	chr07	20936091	20941652	+	Similar to permeases of the major facilitator superfamily. (Os07t0534000-01)
indica	TIP_40362	Os06g0136300	OS06T0136300-01	7,0914E-05	0,904289886	0,192113292	up	R1	TIP	dry	121	0,082644628	chr06	1923164	MITE/Tourist	chr06	1922429	1923593	+	Similar to OSIGBa0142C11.2 protein. (Os06t0136300-01)
indica	TIP_32658	Os04g0630300	OS04T0630300-01	7,73999E-05	-0,670534724	0,190859139	down	R1	TIP	dry	126	0,253968254	chr04	32063559	DNAnona/MULE	chr04	32059560	32062390	+	NAD(P)-binding domain containing protein. (Os04t0630300-01)
indica	TIP_9857	Os01g0965900	OS01T0965900-01	7,79436E-05	-0,579582991	0,19062432	down	R1	TIP	dry	126	0,785714286	chr01	42592996	LINE/unknown	chr01	42587307	42590270	-	Conserved hypothetical protein. (Os01t0965900-01)
indica	TIP_39595	Os05g0566800	OS05T0566800-01	8,4679E-05	-0,790209384	0,189310701	down	R1	TIP	dry	126	0,888888889	chr05	28213496	DNAnona/Helitron	chr05	28213968	28216045	-	Cold acclimation protein COR413-TM1 (Os05t0566800-01)
indica	TIP_37386	Os05g0405500	OS05T0405500-01	8,4679E-05	-0,4318063	0,189287166	down	R1	TIP	dry	126	0,317460317	chr05	19742652	DNAnona/MULE	chr05	19742292	19744773	-	Similar to Cytochrome P450 CYP721B4. (Os05t0405500-01)
indica	TIP_65	Os01g0105900	OS01T0105900-01	0,000106791	0,602963053	0,186201121	up	R1	TIP	dry	126	0,801587302	chr01	317978	MITE/Stow	chr01	309520	313170	-	PfkB carbohydrate kinase protein, Regulation of plant height and leaf structure (Os01t0105900-01)
indica	TIP_52081	Os07g0664000	OS07T0664000-00	0,000110597	-0,650490002	0,185615319	down	R1	TIP	dry	126	0,920634921	chr07	28016916	MITE/Stow	chr07	28020795	28021694	+	Similar to Oxidoreductase, short chain dehydrogenase/reductase family protein, expressed. (Os07t0664000-00)
indica	TIP_60938	Os09g0451400	OS09T0451400-01	0,000119553	-0,398742702	0,184485352	down	R1	TIP	dry	126	0,531746032	chr09	16925727	DNAnona/Helitron	chr09	16925457	16927046	+	ACC oxidase, Ethylene biosynthesis (Os09t0451400-01)
indica	TIP_24698	Os03g0673600	OS03T0673600-01	0,000133982	1,185614967	0,182895501	up	R1	TIP	dry	115	0,252173913	chr03	26622142	DNAnona/CACTA	chr03	26617086	26618211	-	Conserved hypothetical protein. (Os03t0673600-01)
indica	TIP_72743	Os12g0226700	OS12T0226700-01	0,000146236	0,806111808	0,181636231	up	R1	TIP	dry	113	0,14159292	chr12	6912098	MITE/Stow	chr12	6911276	6913929	+	Similar to Allyl alcohol dehydrogenase. (Os12t0226700-01)
indica	TIP_2027	Os01g0250900	OS01T0250900-01	0,000146236	-0,437588825	0,181506967	down	R1	TIP	dry	126	0,26984127	chr01	8273288	DNAnona/MULE	chr01	8275474	8283959	+	HAD superfamily (subfamily IG) hydrolase, 5'-Nucleotidase protein. (Os01t0250900-01)
indica	TIP_27791	Os04g0188433	OS04T0188433-01	0,00014724	-0,765223038	0,18128581	down	R1	TIP	dry	126	0,753968254	chr04	5928415	MITE/Stow	chr04	5931193	5931871	-	Similar to OSIGBa0102N07.2 protein. (Os04t0188433-01)
indica	TIP_41603	Os06g0239200	OS06T0239200-00	0,000161704	0,483512844	0,179955554	up	R1	TIP	dry	126	0,444444444	chr06	7230724	DNAnona/MULE	chr06	7230221	7230662	+	Conserved hypothetical protein. (Os06t0239200-00)
indica	TIP_23286	Os03g0575700	OS03T0575700-01	0,000200544	0,242835835	0,177066473	up	R1	TIP	dry	126	0,055555556	chr03	21041342	MITE/Stow	chr03	21037379	21038297	-	Conserved hypothetical protein. (Os03t0575700-01)
indica	TIP_72461	Os12g0189400	OS12T0189400-01	0,000218014	-0,394911752	0,175863946	down	R1	TIP	dry	126	0,880952381	chr12	4504220	SINE/unknown	chr12	4506779	4507716	+	Similar to Photosystem I reaction centre subunit N, chloroplast precursor (PSI- N). (Os12t0189400-01)
indica	TIP_40181	Os06g0124900	OS06T0124900-01	0,00023082	-0,746100241	0,175001335	down	R1	TIP	dry	126	0,904761905	chr06	1343058	DNAnona/hAT	chr06	1341610	1344490	+	Conserved hypothetical protein. (Os06t0124900-01)
indica	TIP_61	Os01g0105900	OS01T0105900-01	0,000341659	0,584753126	0,169783712	up	R1	TIP	dry	126	0,80952381	chr01	307862	MITE/Stow	chr01	309520	313170	-	PfkB carbohydrate kinase protein, Regulation of plant height and leaf structure (Os01t0105900-01)
indica	TIP_40475	Os06g0147000	OS06T0147000-01	0,000341659	-0,655273755	0,169691265	down	R1	TIP	dry	125	0,896	chr06	2453895	MITE/Tourist	chr06	2453481	2454046	-	Conserved hypothetical protein. (Os06t0147000-01)
indica	TIP_30853	Os04g0499200	OS04T0499200-01	0,00034242	-0,588532296	0,169536422	down	R1	TIP	dry	126	0,142857143	chr04	24945654	MITE/Tourist	chr04	24943121	24945222	-	Enhancer of rudimentary family protein. (Os04t0499200-01)
indica	TIP_543	Os01g0152900	OS01T0152900-00	0,00037822	0,41909355	0,168125418	up	R1	TIP	dry	126	0,682539683	chr01	2839521	LINE/unknown	chr01	2844503	2845212	-	Similar to Histone H2B.1. (Os01t0152900-00)
indica	TIP_59881	Os09g0380400	OS09T0380400-01	0,000390783	0,541699068	0,167530008	up	R1	TIP	dry	123	0,788617886	chr09	12833738	DNAnona/MULE	chr09	12833971	12834961	+	Conserved hypothetical protein. (Os09t0380400-01)
indica	TIP_55217	Os08g0364900	OS08T0364900-00	0,000390783	0,486846225	0,167455749	up	R1	TIP	dry	125	0,32	chr08	16895443	MITE/Tourist	chr08	16892349	16896395	+	Similar to Pirin-like protein. (Os08t0364900-00)
indica	TIP_73356	Os12g0288400	OS12T0288400-01	0,000413283	-0,438414573	0,166608823	down	R1	TIP	dry	126	0,841269841	chr12	11050321	LTR/Copia	chr12	11045896	11057114	-	Similar to Ubiquitin ligase protein mib (EC 6.3.2.-) (Mind bomb protein). (Os12t0288400-01)
indica	TIP_72680	Os12g0209700	OS12T0209700-01	0,000426126	0,478210968	0,16609148	up	R1	TIP	dry	126	0,793650794	chr12	5740382	MITE/Stow	chr12	5736998	5739519	+	Hypothetical conserved gene. (Os12t0209700-01)
indica	TIP_34323	Os05g0171200	OS05T0171200-01	0,000440672	0,572610167	0,165536562	up	R1	TIP	dry	126	0,80952381	chr05	4267734	MITE/Stow	chr05	4262642	4263449	+	Embryo-specific 3 family protein. (Os05t0171200-01)
indica	TIP_162	Os01g0115700	OS01T0115700-00	0,000465341	-0,345791094	0,164711041	down	R1	TIP	dry	122	0,401639344	chr01	853367	LINE/unknown	chr01	851835	854599	-	Receptor-like kinase 19 (Os01t0115700-01)
indica	TIP_24698	Os03g0673700	OS03T0673700-01	0,000476507	0,534860954	0,164285554	up	R1	TIP	dry	115	0,252173913	chr03	26622142	DNAnona/CACTA	chr03	26622941	26623429	+	Similar to predicted protein. (Os03t0673700-01)
indica	TIP_9856	Os01g0965900	OS01T0965900-01	0,000496482	-0,523455493	0,163635429	down	R1	TIP	dry	126	0,76984127	chr01	42586676	MITE/Stow	chr01	42587307	42590270	-	Conserved hypothetical protein. (Os01t0965900-01)
indica	TIP_50499	Os07g0534000	OS07T0534000-01	0,000552941	0,533075463	0,162118879	up	R1	TIP	dry	126	0,166666667	chr07	20934176	DNAnona/MULE	chr07	20936091	20941652	+	Similar to permeases of the major facilitator superfamily. (Os07t0534000-01)
indica	TIP_61815	Os09g0518200	OS09T0518200-01	0,000701993	-0,628557437	0,158892691	down	R1	TIP	dry	126	0,928571429	chr09	20218770	DNAauto/MULE	chr09	20222176	20223992	+	UDP:glucose salicylic acid glucosyltransferase, Chemically-induced disease resistance (Os09t0518200-01)
indica	TIP_2128	Os01g0258600	OS01T0258600-00	0,000707801	0,387065993	0,158671062	up	R1	TIP	dry	125	0,744	chr01	8656782	DNAnona/MULE	chr01	8657066	8658466	+	Plant-specific small protein, Hybrid incompatibility, Pollen germination (Os01t0258600-01)
indica	TIP_15293	Os02g0597300	OS02T0597300-01	0,00074123	-0,238835171	0,157842985	down	R1	TIP	dry	126	0,5	chr02	23212963	DNAauto/MLE	chr02	23211709	23219912	+	Leucine-rich repeat domain containing protein. (Os02t0597300-01)
indica	TIP_15294	Os02g0597300	OS02T0597300-01	0,00074123	-0,238835171	0,157842985	down	R1	TIP	dry	126	0,5	chr02	23213038	DNAauto/MLE	chr02	23211709	23219912	+	Leucine-rich repeat domain containing protein. (Os02t0597300-01)
indica	TIP_697	Os01g0170900	OS01T0170900-01	0,000803355	-0,48863587	0,156679333	down	R1	TIP	dry	126	0,634920635	chr01	3665958	SINE/unknown	chr01	3665042	3666044	-	Conserved hypothetical protein. (Os01t0170900-01)
indica	TIP_47232	Os07g0162500	OS07T0162500-02	0,000849872	-0,566306954	0,155832223	down	R1	TIP	dry	126	0,095238095	chr07	3347485	MITE/Tourist	chr07	3342219	3343596	-	Alpha/beta hydrolase fold-3 domain containing protein. (Os07t0162500-02)
indica	TIP_24699	Os03g0673700	OS03T0673700-01	0,000991796	0,442545376	0,153698721	up	R1	TIP	dry	124	0,39516129	chr03	26622437	MITE/Tourist	chr03	26622941	26623429	+	Similar to predicted protein. (Os03t0673700-01)
indica	TIP_53268	Os08g0158900	OS08T0158900-01	0,001003769	-0,420264135	0,153432411	down	R1	TIP	dry	118	0,415254237	chr08	3432485	MITE/Tourist	chr08	3432154	3438225	-	GTP1/OBG domain containing protein. (Os08t0158900-01)
indica	TIP_66314	Os10g0532800	OS10T0532800-01	0,001116865	-0,218361271	0,151922576	down	R1	TIP	dry	126	0,650793651	chr10	20722579	DNAnona/Helitron	chr10	20719171	20722927	-	Conserved hypothetical protein. (Os10t0532800-01);Conserved hypothetical protein. (Os10t0532800-02)
indica	TIP_32057	Os04g0585700	OS04T0585700-01	0,001244631	-0,48717136	0,150391187	down	R1	TIP	dry	126	0,206349206	chr04	29594995	LTR/Copia	chr04	29588252	29590515	-	Protein of unknown function DUF581 family protein. (Os04t0585700-01)
indica	TIP_50500	Os07g0534000	OS07T0534000-01	0,001517154	0,52986243	0,14767645	up	R1	TIP	dry	126	0,150793651	chr07	20936030	DNAnona/Helitron	chr07	20936091	20941652	+	Similar to permeases of the major facilitator superfamily. (Os07t0534000-01)
indica	TIP_64159	Os10g0365800	OS10T0365800-01	0,001528293	-0,222957649	0,147474031	down	R1	TIP	dry	126	0,626984127	chr10	11414519	DNAnona/hAT	chr10	11414311	11417030	+	Protein of unknown function DUF3615 domain containing protein. (Os10t0365800-01)
indica	TIP_41037	Os06g0202300	OS06T0202300-01	0,001656482	-1,116947279	0,146305933	down	R1	TIP	dry	126	0,031746032	chr06	5158333	MITE/Tourist	chr06	5158231	5165171	+	Conserved hypothetical protein. (Os06t0202300-01)
indica	TIP_37375	Os05g0404400	OS05T0404400-02	0,001738813	0,357313806	0,145560852	up	R1	TIP	dry	126	0,579365079	chr05	19693132	MITE/Tourist	chr05	19691349	19694288	-	Similar to RPH1 (RESISTANCE TO PHYTOPHTHORA 1). (Os05t0404400-01);Similar to RPH1 (RESISTANCE TO PHYTOPHTHORA 1). (Os05t0404400-02)
indica	TIP_11492	Os02g0212500	OS02T0212500-01	0,002011497	0,492774889	0,143530754	up	R1	TIP	dry	116	0,784482759	chr02	6272296	LINE/unknown	chr02	6270314	6271547	+	Conserved hypothetical protein. (Os02t0212500-01)
indica	TIP_41602	Os06g0239200	OS06T0239200-00	0,002085044	-0,440680728	0,142854093	down	R1	TIP	dry	119	0,512605042	chr06	7227395	DNAnona/MULEtir	chr06	7230221	7230662	+	Conserved hypothetical protein. (Os06t0239200-00)
indica	TIP_14752	Os02g0557100	OS02T0557100-01	0,002085044	0,365087716	0,142850075	up	R1	TIP	dry	126	0,261904762	chr02	21088651	MITE/Tourist	chr02	21082668	21088255	+	AIG1 domain containing protein. (Os02t0557100-01)
indica	TIP_1416	Os01g0214500	OS01T0214500-01	0,002102973	-0,483330726	0,142635195	down	R1	TIP	dry	126	0,285714286	chr01	6253685	MITE/Stow	chr01	6257846	6258501	+	Conserved hypothetical protein. (Os01t0214500-01)
indica	TIP_61821	Os09g0518200	OS09T0518200-01	0,002104	-0,669639254	0,142527997	down	R1	TIP	dry	124	0,943548387	chr09	20228228	MITE/Tourist	chr09	20222176	20223992	+	UDP:glucose salicylic acid glucosyltransferase, Chemically-induced disease resistance (Os09t0518200-01)
indica	TIP_18727	Os03g0134300	OS03T0134300-01	0,002171712	-0,320766642	0,142008324	down	R1	TIP	dry	126	0,214285714	chr03	1913658	LTR/Copia	chr03	1909201	1919394	+	Similar to ATP phosphoribosyl transferase. (Os03t0134300-01)
indica	TIP_4554	Os01g0552300	OS01T0552300-01	0,002172102	0,381879693	0,14183576	up	R1	TIP	dry	126	0,76984127	chr01	20739631	MITE/Tourist	chr01	20738654	20742427	+	Similar to Protein phosphatase-2C. (Os01t0552300-01)
indica	TIP_68017	Os11g0202300	OS11T0202300-02	0,002172102	-0,587724683	0,141808131	down	R1	TIP	dry	125	0,152	chr11	5166547	LTR/Gypsy	chr11	5168780	5172092	-	Cyclin-like F-box domain containing protein. (Os11t0202300-01);Similar to F-box domain containing protein, expressed. (Os11t0202300-02)
indica	TIP_41951	Os06g0268700	OS06T0268700-01	0,002181347	-0,415395155	0,14165401	down	R1	TIP	dry	126	0,317460317	chr06	8952336	MITE/Stow	chr06	8955691	8959653	+	Peptidase A1 domain containing protein. (Os06t0268700-01)
indica	TIP_53269	Os08g0158900	OS08T0158900-01	0,002210022	0,393222681	0,141383738	up	R1	TIP	dry	126	0,603174603	chr08	3440840	LTR/Gypsy	chr08	3432154	3438225	-	GTP1/OBG domain containing protein. (Os08t0158900-01)
indica	TIP_58785	Os09g0272000	OS09T0272000-01	0,002369158	0,600621571	0,140364935	up	R1	TIP	dry	116	0,310344828	chr09	5397336	MITE/Stow	chr09	5395272	5396709	-	Heavy metal transport/detoxification protein domain containing protein. (Os09t0272000-01)
indica	TIP_41204	Os06g0211300	OS06T0211300-01	0,002432776	0,385742436	0,139917391	up	R1	TIP	dry	119	0,571428571	chr06	5691350	DNAauto/POLE	chr06	5688697	5690594	+	Short-chain dehydrogenase/reductase SDR domain containing protein. (Os06t0211300-01)
indica	TIP_18343	Os03g0105401	OS03T0105401-00	0,002610045	-0,178291637	0,138888072	down	R1	TIP	dry	126	0,650793651	chr03	338381	LTR/Gypsy	chr03	324659	337243	+	Hypothetical gene. (Os03t0105401-00)
indica	TIP_52722	Os08g0114100	OS08T0114100-01	0,002698931	0,25986662	0,138348438	up	R1	TIP	dry	123	0,569105691	chr08	749664	DNAnona/MULE	chr08	751421	753191	+	Green tissues expressed protein (Os08t0114100-01)
indica	TIP_31788	Os04g0567700	OS04T0567700-01	0,003095801	0,528671204	0,136429368	up	R1	TIP	dry	126	0,087301587	chr04	28520306	DNAnona/unknown	chr04	28521890	28525648	+	ORMDL family protein. (Os04t0567700-01)
indica	TIP_22204	Os03g0389100	OS03T0389100-01	0,003138423	-0,42930939	0,136055644	down	R1	TIP	dry	126	0,555555556	chr03	15567962	LTR/Copia	chr03	15567899	15572135	-	Peptidase C14, caspase catalytic domain containing protein. (Os03t0389100-01)
indica	TIP_27083	Os03g0850400	OS03T0850400-01	0,003138423	-0,533783809	0,136052596	down	R1	TIP	dry	126	0,238095238	chr03	35786647	DNAauto/MULE	chr03	35790044	35795425	+	Similar to Aspartokinase. (Os03t0850400-01)
indica	TIP_67873	Os11g0184900	OS11T0184900-02	0,003138423	-0,409797129	0,135968895	down	R1	TIP	dry	126	0,555555556	chr11	4305229	DNAnona/MULE	chr11	4299277	4301784	-	Similar to OsNAC5 protein [imported]-rice. (Os11t0184900-01);NAC-type transcription factor, Regulation of stress-inducible genes, Stress tolerance (Os11t0184900-02)
indica	TIP_73985	Os12g0458100	OS12T0458100-01	0,003195981	0,806474651	0,135635273	up	R1	TIP	dry	123	0,048780488	chr12	15993982	MITE/Tourist	chr12	15998272	16005479	-	Transferase family protein. (Os12t0458100-01)
indica	TIP_39693	Os05g0574800	OS05T0574800-00	0,00331567	-0,373300902	0,134886832	down	R1	TIP	dry	126	0,920634921	chr05	28636217	MITE/Stow	chr05	28632991	28636150	+	Hypothetical conserved gene. (Os05t0574800-00)
indica	TIP_24699	Os03g0673600	OS03T0673600-01	0,00331567	0,870979573	0,134886556	up	R1	TIP	dry	124	0,39516129	chr03	26622437	MITE/Tourist	chr03	26617086	26618211	-	Conserved hypothetical protein. (Os03t0673600-01)
indica	TIP_32053	Os04g0585700	OS04T0585700-01	0,00331567	-0,461835454	0,134874284	down	R1	TIP	dry	125	0,208	chr04	29586787	MITE/Tourist	chr04	29588252	29590515	-	Protein of unknown function DUF581 family protein. (Os04t0585700-01)
indica	TIP_53796	Os08g0205150	OS08T0205150-01	0,003336848	0,337735162	0,134700234	up	R1	TIP	dry	126	0,142857143	chr08	6142909	LTR/Copia	chr08	6137622	6141504	+	CC-NBS-LRR protein, Cold stress signaling and response (Os08t0205150-01)
indica	TIP_53603	Os08g0183900	OS08T0183900-01	0,003592084	0,391385782	0,133628548	up	R1	TIP	dry	123	0,577235772	chr08	4897410	DNAnona/Helitron	chr08	4897613	4900341	-	Similar to dihydroflavonol-4-reductase. (Os08t0183900-01)
indica	TIP_41619	Os06g0241200	OS06T0241200-01	0,003742579	0,232176779	0,132992667	up	R1	TIP	dry	119	0,277310924	chr06	7329511	DNAnona/MULE	chr06	7333167	7336677	+	Conserved hypothetical protein. (Os06t0241200-01)
indica	TIP_41952	Os06g0268700	OS06T0268700-01	0,00379036	0,404881767	0,13273574	up	R1	TIP	dry	126	0,69047619	chr06	8952859	MITE/Tourist	chr06	8955691	8959653	+	Peptidase A1 domain containing protein. (Os06t0268700-01)
indica	TIP_38610	Os05g0492500	OS05T0492500-01	0,003905216	0,39359835	0,132198359	up	R1	TIP	dry	112	0,285714286	chr05	24196744	DNAnona/Helitron	chr05	24194658	24202634	-	Hypothetical protein. (Os05t0492500-01)
indica	TIP_24690	Os03g0673600	OS03T0673600-01	0,003905216	0,96325066	0,132163587	up	R1	TIP	dry	124	0,258064516	chr03	26613339	MITE/Stow	chr03	26617086	26618211	-	Conserved hypothetical protein. (Os03t0673600-01)
indica	TIP_30311	Os04g0456700	OS04T0456700-01	0,003929372	0,639946553	0,13199529	up	R1	TIP	dry	110	0,854545455	chr04	22831379	DNAauto/MLE	chr04	22829317	22830301	+	Similar to TMV induced protein 1-2. (Os04t0456700-01)
indica	TIP_67482	Os11g0155600	OS11T0155600-01	0,004084236	-0,59796437	0,131378042	down	R1	TIP	dry	126	0,174603175	chr11	2603743	LINE/unknown	chr11	2605752	2614119	-	Conserved hypothetical protein. (Os11t0155600-01)
indica	TIP_29027	Os04g0364800	OS04T0364800-00	0,004084236	0,277958004	0,131308452	up	R1	TIP	dry	112	0,5625	chr04	17560371	MITE/Stow	chr04	17560683	17561234	+	Barwin-related endoglucanase domain containing protein. (Os04t0364800-00)
indica	TIP_10683	Os02g0162500	OS02T0162500-01	0,004602222	-0,524422888	0,129626852	down	R1	TIP	dry	124	0,225806452	chr02	3357366	DNAnona/MULE	chr02	3358928	3360718	-	Similar to 40S ribosomal protein S14. (Os02t0162500-01)
indica	TIP_30362	Os04g0460350	OS04T0460350-00	0,004668006	0,418903142	0,129352932	up	R1	TIP	dry	126	0,825396825	chr04	22985685	DNAnona/MULE	chr04	22980664	22981298	-	Similar to predicted protein. (Os04t0460350-00)
indica	TIP_60554	Os09g0428900	OS09T0428900-01	0,00469786	0,372061609	0,129184159	up	R1	TIP	dry	126	0,206349206	chr09	15589044	MITE/Stow	chr09	15583194	15586475	+	Similar to Conserved protein. (Os09t0428900-01)
indica	TIP_55228	Os08g0366100	OS08T0366100-01	0,004795943	0,261886346	0,128824528	up	R1	TIP	dry	119	0,411764706	chr08	16981930	MITE/Tourist	chr08	16982279	16985259	+	Similar to Endothelial differentiation-related factor 1 (EDF-1) (Multiprotein bridging factor 1) (MBF1). (Os08t0366100-01)
indica	TIP_67604	Os11g0162700	OS11T0162700-02	0,004898059	0,183049013	0,128459876	up	R1	TIP	dry	125	0,272	chr11	3058100	DNAnona/Helitron	chr11	3058267	3062680	-	Hypothetical conserved gene. (Os11t0162700-01);Hypothetical conserved gene. (Os11t0162700-02)
indica	TIP_32657	Os04g0630300	OS04T0630300-01	0,00502596	0,54370762	0,128032525	up	R1	TIP	dry	126	0,738095238	chr04	32061496	MITE/Tourist	chr04	32059560	32062390	+	NAD(P)-binding domain containing protein. (Os04t0630300-01)
indica	TIP_4826	Os01g0579900	OS01T0579900-01	0,005499343	0,361197859	0,126685485	up	R1	TIP	dry	126	0,69047619	chr01	22436859	MITE/Stow	chr01	22439040	22441966	-	Esterase/lipase/thioesterase domain containing protein. (Os01t0579900-01)
indica	TIP_26679	Os03g0811500	OS03T0811500-01	0,005499343	-0,412062959	0,126663088	down	R1	TIP	dry	126	0,785714286	chr03	33987228	MITE/Tourist	chr03	33988216	33991906	-	Zinc finger, HIT-type domain containing protein. (Os03t0811500-01)
indica	TIP_63931	Os10g0343100	OS10T0343100-01	0,005689488	-0,305026014	0,126126402	down	R1	TIP	dry	126	0,333333333	chr10	10174319	MITE/Tourist	chr10	10170579	10174444	+	Syntaxin 6, N-terminal domain containing protein. (Os10t0343100-01)
indica	TIP_48085	Os07g0223766	OS07T0223766-01	0,006089792	-0,238082339	0,125133399	down	R1	TIP	dry	126	0,920634921	chr07	6854148	DNAnona/Helitron	chr07	6849842	6851728	-	Hypothetical conserved gene. (Os07t0223766-01)
indica	TIP_46627	Os07g0110900	OS07T0110900-01	0,006265459	0,424774964	0,124671682	up	R1	TIP	dry	108	0,638888889	chr07	606924	MITE/Tourist	chr07	607685	608602	+	Conserved hypothetical protein. (Os07t0110900-01)
indica	TIP_1959	Os01g0246400	OS01T0246400-01	0,00642456	-0,61780459	0,124255454	down	R1	TIP	dry	126	0,182539683	chr01	8063852	MITE/Tourist	chr01	8061858	8062892	+	Similar to Low molecular mass early light-inducible protein HV90, chloroplast precursor (ELIP). (Os01t0246400-01)
indica	TIP_46974	Os07g0142900	OS07T0142900-01	0,007949736	-0,364496033	0,121310826	down	R1	TIP	dry	126	0,658730159	chr07	2191529	DNAnona/Helitron	chr07	2193809	2196930	+	Aldo/keto reductase family protein. (Os07t0142900-01)
indica	TIP_5273	Os01g0611300	OS01T0611300-01	0,008132394	-0,144794611	0,120926305	down	R1	TIP	dry	126	0,642857143	chr01	24196234	DNAnona/MULE	chr01	24195504	24196616	+	Similar to Metal tolerance protein 7. (Os01t0611300-01)
indica	TIP_41202	Os06g0211300	OS06T0211300-01	0,008135335	0,345510187	0,120843338	up	R1	TIP	dry	126	0,531746032	chr06	5689446	DNAnona/Helitron	chr06	5688697	5690594	+	Short-chain dehydrogenase/reductase SDR domain containing protein. (Os06t0211300-01)
indica	TIP_580	Os01g0158200	OS01T0158200-01	0,008217595	0,498578305	0,120630134	up	R1	TIP	dry	126	0,134920635	chr01	3051094	DNAnona/MULE	chr01	3054481	3057198	+	Similar to Serine carboxypeptidase II-1 precursor (EC 3.4.16.6) (CP-MII.1) (Fragment). (Os01t0158200-01)
indica	TIP_53446	Os08g0170700	OS08T0170700-00	0,00827723	-0,290212434	0,120446294	down	R1	TIP	dry	126	0,253968254	chr08	4135256	DNAnona/unknown	chr08	4135126	4138360	-	Disease resistance protein domain containing protein. (Os08t0170700-00)
indica	TIP_40855	Os06g0184800	OS06T0184800-01	0,00827723	-0,427315389	0,120378693	down	R1	TIP	dry	126	0,785714286	chr06	4260021	MITE/Stow	chr06	4264424	4265115	-	Similar to Low-temperature induced protein lt101.1 (Blt101) (Blt101.1). (Os06t0184800-01)
indica	TIP_55229	Os08g0366100	OS08T0366100-01	0,008304119	-0,243004444	0,120247581	down	R1	TIP	dry	125	0,496	chr08	16983803	MITE/Stow	chr08	16982279	16985259	+	Similar to Endothelial differentiation-related factor 1 (EDF-1) (Multiprotein bridging factor 1) (MBF1). (Os08t0366100-01)
indica	TIP_43197	Os06g0484500	OS06T0484500-01	0,008304119	0,395565753	0,120182692	up	R1	TIP	dry	126	0,476190476	chr06	16500457	DNAnona/MULE	chr06	16504514	16505330	+	Conserved hypothetical protein. (Os06t0484500-01)
indica	TIP_41953	Os06g0268700	OS06T0268700-01	0,008544073	-0,390318772	0,119723164	down	R1	TIP	dry	126	0,293650794	chr06	8953582	DNAnona/Tourist	chr06	8955691	8959653	+	Peptidase A1 domain containing protein. (Os06t0268700-01)
indica	TIP_16657	Os02g0701600	OS02T0701600-01	0,008906345	0,345649556	0,119088028	up	R1	TIP	dry	126	0,523809524	chr02	28901667	LTR/Gypsy	chr02	28894065	28897418	+	Similar to Tocopherol O-methyltransferase, chloroplast precursor (EC 2.1.1.95) (Gamma-tocopherol methyltransferase). (Os02t0701600-01)
indica	TIP_72762	Os12g0228800	OS12T0228800-01	0,009151305	0,299711304	0,118647252	up	R1	TIP	dry	126	0,063492063	chr12	7011790	MITE/Stow	chr12	7014180	7014828	-	Similar to Calmodulin-like protein. (Os12t0228800-01)
indica	TIP_21138	Os03g0313800	OS03T0313800-00	0,009158119	-0,423839805	0,118562866	down	R1	TIP	dry	126	0,206349206	chr03	11215019	DNAauto/POLE	chr03	11217875	11218517	-	Hypothetical conserved gene. (Os03t0313800-00)
indica	TIP_21583	Os03g0345700	OS03T0345700-01	0,009191491	-0,367192452	0,118439843	down	R1	TIP	dry	126	0,611111111	chr03	12904388	DNAnona/Helitron	chr03	12906020	12907083	-	Similar to Heavy metal-associated domain containing protein, expressed. (Os03t0345700-01)
indica	TIP_22132	Os03g0385400	OS03T0385400-01	0,009427051	0,362279034	0,118024759	up	R1	TIP	dry	126	0,658730159	chr03	15308076	MITE/Tourist	chr03	15307624	15309776	+	Bifunctional inhibitor/plant lipid transfer protein/seed storage domain containing protein. (Os03t0385400-01)
indica	TIP_535	Os01g0151400	OS01T0151400-01	0,009648719	0,313831893	0,117565028	up	R1	TIP	dry	126	0,373015873	chr01	2776856	MITE/Tourist	chr01	2776973	2781723	+	Similar to Gamma-glutamyl transferase. (Os01t0151400-01)
indica	TIP_536	Os01g0151400	OS01T0151400-01	0,009648719	0,313831893	0,117565028	up	R1	TIP	dry	126	0,373015873	chr01	2777672	DNAnona/MULE	chr01	2776973	2781723	+	Similar to Gamma-glutamyl transferase. (Os01t0151400-01)
indica	TIP_30311	Os04g0457000	OS04T0457000-01	0,009969021	0,439749096	0,117002967	up	R1	TIP	dry	110	0,854545455	chr04	22831379	DNAauto/MLE	chr04	22835913	22837163	-	Similar to Chlorophyll a/b-binding protein CP24, photosystem II (Fragment). (Os04t0457000-01)
indica	TIP_71080	Os11g0630300	OS11T0630300-01	0,009969021	0,24110159	0,116979535	up	R1	TIP	dry	126	0,293650794	chr11	24715475	MITE/Stow	chr11	24716906	24719902	+	Conserved hypothetical protein. (Os11t0630300-01)
indica	TIP_46951	Os07g0140633	OS07T0140633-00	0,011070675	0,218621361	0,115491255	up	R1	TIP	dry	126	0,587301587	chr07	2116361	LINE/unknown	chr07	2117854	2118368	-	Hypothetical gene. (Os07t0140633-00)
indica	TIP_45877	Os06g0680900	OS06T0680900-02	0,011200359	-0,24783066	0,11509082	down	R1	TIP	dry	126	0,920634921	chr06	28362611	MITE/Stow	chr06	28363631	28371929	-	Similar to predicted protein. (Os06t0680900-01);Exostosin-like family protein. (Os06t0680900-02)
indica	TIP_41184	Os06g0210200	OS06T0210200-01	0,011200359	-0,516237291	0,115054801	down	R1	TIP	dry	126	0,880952381	chr06	5621083	MITE/Tourist	chr06	5621964	5625687	+	Peptidase M20 domain containing protein. (Os06t0210200-01)
indica	TIP_41185	Os06g0210200	OS06T0210200-01	0,011200359	0,516237291	0,115054801	up	R1	TIP	dry	126	0,119047619	chr06	5626139	DNAnona/MULE	chr06	5621964	5625687	+	Peptidase M20 domain containing protein. (Os06t0210200-01)
indica	TIP_34317	Os05g0170950	OS05T0170950-00	0,011200359	-0,347503009	0,115050534	down	R1	TIP	dry	126	0,531746032	chr05	4252043	DNAnona/Helitron	chr05	4254052	4254939	+	Similar to Plastid phosphoenolpyruvate/phosphate translocator. (Os05t0170950-00)
indica	TIP_30609	Os04g0477900	OS04T0477900-01	0,011569596	0,291474104	0,114541855	up	R1	TIP	dry	110	0,563636364	chr04	23912608	DNAnona/MULEtir	chr04	23912885	23915134	+	Similar to Cysteine proteinase EP-B 1 precursor (EC 3.4.22.-). (Os04t0477900-01)
indica	TIP_32312	Os04g0606000	OS04T0606000-01	0,011865404	-0,550961745	0,114061429	down	R1	TIP	dry	126	0,150793651	chr04	30608397	MITE/Tourist	chr04	30608872	30610396	-	Transferase family protein. (Os04t0606000-01)
indica	TIP_32314	Os04g0606000	OS04T0606000-01	0,011865404	0,550961745	0,114061429	up	R1	TIP	dry	126	0,849206349	chr04	30613891	MITE/Tourist	chr04	30608872	30610396	-	Transferase family protein. (Os04t0606000-01)
indica	TIP_34319	Os05g0171200	OS05T0171200-01	0,01201224	0,501529203	0,113826075	up	R1	TIP	dry	123	0,829268293	chr05	4262231	DNAnona/Helitron	chr05	4262642	4263449	+	Embryo-specific 3 family protein. (Os05t0171200-01)
indica	TIP_37237	Os05g0393200	OS05T0393200-00	0,01253321	-0,285512204	0,113182711	down	R1	TIP	dry	126	0,912698413	chr05	19121000	DNAnona/hAT	chr05	19124235	19128438	+	Similar to structural constituent of ribosome. (Os05t0393200-00)
indica	TIP_16655	Os02g0701600	OS02T0701600-01	0,012574561	0,470061112	0,113069881	up	R1	TIP	dry	126	0,150793651	chr02	28894612	MITE/Tourist	chr02	28894065	28897418	+	Similar to Tocopherol O-methyltransferase, chloroplast precursor (EC 2.1.1.95) (Gamma-tocopherol methyltransferase). (Os02t0701600-01)
indica	TIP_72681	Os12g0209700	OS12T0209700-01	0,012732219	0,378936278	0,112833236	up	R1	TIP	dry	126	0,76984127	chr12	5741710	MITE/Stow	chr12	5736998	5739519	+	Hypothetical conserved gene. (Os12t0209700-01)
indica	TIP_8592	Os01g0869800	OS01T0869800-01	0,01352014	0,339312496	0,111952133	up	R1	TIP	dry	126	0,079365079	chr01	37695386	DNAauto/MULE	chr01	37697024	37699582	+	22-kDa Photosystem II protein, Photoprotection (Os01t0869800-01)
indica	TIP_40552	Os06g0154400	OS06T0154400-01	0,014526743	0,667552478	0,110911319	up	R1	TIP	dry	121	0,066115702	chr06	2802746	DNAnona/unknown	chr06	2803042	2806247	+	Domain of unknown function DUF676, lipase-like domain containing protein. (Os06t0154400-01)
indica	TIP_46950	Os07g0140633	OS07T0140633-00	0,014709469	0,214656605	0,110674814	up	R1	TIP	dry	126	0,595238095	chr07	2113296	LTR/Copia	chr07	2117854	2118368	-	Hypothetical gene. (Os07t0140633-00)
indica	TIP_169	Os01g0116900	OS01T0116900-00	0,014721258	0,413431661	0,110597296	up	R1	TIP	dry	123	0,146341463	chr01	937226	MITE/Tourist	chr01	924451	956639	+	Protein kinase, catalytic domain domain containing protein. (Os01t0116900-00)
indica	TIP_35506	Os05g0256100	OS05T0256100-01	0,014913261	-0,493862121	0,110355186	down	R1	TIP	dry	126	0,111111111	chr05	9478803	LTR/Gypsy	chr05	9461682	9474094	+	Similar to SHR5-receptor-like kinase (Fragment). (Os05t0256100-01)
indica	TIP_75868	Os12g0637300	OS12T0637300-01	0,015074803	0,36644431	0,110142999	up	R1	TIP	dry	126	0,031746032	chr12	27317163	LTR/Gypsy	chr12	27313227	27316327	+	Conserved hypothetical protein. (Os12t0637300-01)
indica	TIP_66406	Os10g0539500	OS10T0539500-01	0,015099109	0,415715655	0,110055435	up	R1	TIP	dry	126	0,76984127	chr10	21023246	SINE/unknown	chr10	21019357	21019902	-	Similar to Histone H4. (Os10t0539500-01)
indica	TIP_34321	Os05g0171200	OS05T0171200-01	0,01522657	0,75231683	0,109815406	up	R1	TIP	dry	120	0,933333333	chr05	4264532	MITE/Tourist	chr05	4262642	4263449	+	Embryo-specific 3 family protein. (Os05t0171200-01)
indica	TIP_45706	Os06g0670300	OS06T0670300-01	0,01522657	-0,30776068	0,10981089	down	R1	TIP	dry	126	0,698412698	chr06	27773527	LTR/Gypsy	chr06	27777556	27780675	+	MYB-like transcription factor, Regulation of plant height, Tolerance to cadmium stress (Os06t0670300-01)
indica	TIP_5110	Os01g0599550	OS01T0599550-00	0,015733043	0,270541253	0,109241616	up	R1	TIP	dry	108	0,398148148	chr01	23544012	DNAnona/Helitron	chr01	23541689	23544345	-	Hypothetical gene. (Os01t0599550-00)
indica	TIP_5372	Os01g0617500	OS01T0617500-02	0,015733043	-0,525739939	0,109237501	down	R1	TIP	dry	126	0,968253968	chr01	24533930	SINE/unknown	chr01	24534886	24546684	-	N-terminal acetyltransferase A complex auxiliary subunit NAA15 (Os01t0617500-01);Similar to predicted protein. (Os01t0617500-02)
indica	TIP_37988	Os05g0443900	OS05T0443900-01	0,016536698	-0,285138175	0,108418166	down	R1	TIP	dry	126	0,873015873	chr05	21715763	DNAauto/MULE	chr05	21718749	21724490	+	Ortholog of ZmLG2, bZIP transcriptional factor, Lamina joint positioning and differentiation (Os05t0443900-01)
indica	TIP_9707	Os01g0952700	OS01T0952700-01	0,016536698	0,301079867	0,108389961	up	R1	TIP	dry	125	0,288	chr01	41971118	DNAnona/MULE	chr01	41964153	41970108	+	Metal-dependent hydrolase, composite domain containing protein. (Os01t0952700-01)
indica	TIP_39334	Os05g0546500	OS05T0546500-00	0,016536698	-0,314525395	0,108369316	down	R1	TIP	dry	126	0,301587302	chr05	27119972	DNAauto/MULE	chr05	27124468	27125316	-	Similar to Cell death-related protein. (Os05t0546500-00)
indica	TIP_67483	Os11g0155600	OS11T0155600-01	0,016602751	-0,575780165	0,108234803	down	R1	TIP	dry	126	0,150793651	chr11	2604522	MITE/Tourist	chr11	2605752	2614119	-	Conserved hypothetical protein. (Os11t0155600-01)
indica	TIP_30311	Os04g0457100	OS04T0457100-01	0,016602751	-0,443176984	0,108172626	down	R1	TIP	dry	110	0,854545455	chr04	22831379	DNAauto/MLE	chr04	22836195	22837571	+	Hypothetical protein. (Os04t0457100-01)
indica	TIP_48004	Os07g0212200	OS07T0212200-01	0,016602751	0,51566748	0,108126071	up	R1	TIP	dry	122	0,827868852	chr07	6141632	DNAnona/MULE	chr07	6134016	6136740	+	Similar to MRNA-binding protein (Fragment). (Os07t0212200-01)
indica	TIP_43198	Os06g0484500	OS06T0484500-01	0,01678234	-0,374459903	0,10791745	down	R1	TIP	dry	126	0,492063492	chr06	16501645	MITE/Tourist	chr06	16504514	16505330	+	Conserved hypothetical protein. (Os06t0484500-01)
indica	TIP_52200	Os07g0671800	OS07T0671800-01	0,016809195	-0,364717998	0,107833547	down	R1	TIP	dry	126	0,079365079	chr07	28408277	DNAnona/hAT	chr07	28410540	28412846	+	Similar to Stress-related protein-like protein (Fragment). (Os07t0671800-01)
indica	TIP_41572	Os06g0236266	OS06T0236266-01	0,017143558	-0,220213456	0,107504008	down	R1	TIP	dry	126	0,317460317	chr06	7092867	DNAnona/unknown	chr06	7086668	7088509	-	Conserved hypothetical protein. (Os06t0236266-01)
indica	TIP_34204	Os05g0161500	OS05T0161500-01	0,017516508	-0,457051226	0,107149882	down	R1	TIP	dry	126	0,349206349	chr05	3628628	DNAnona/hAT	chr05	3626394	3629080	+	Calcium-activated (p)ppGpp synthetase, Ca<sup>2+</sup>-activated RelA-SpoT homolog 2 (Os05t0161500-01)
indica	TIP_67371	Os11g0148200	OS11T0148200-01	0,017837364	-0,180898292	0,106841771	down	R1	TIP	dry	126	0,841269841	chr11	2222782	MITE/Tourist	chr11	2224857	2228513	+	Similar to predicted protein. (Os11t0148200-01)
indica	TIP_70318	Os11g0528300	OS11T0528300-01	0,017923499	-0,278707438	0,106715178	down	R1	TIP	dry	126	0,682539683	chr11	19172323	MITE/Stow	chr11	19172896	19174910	+	Protein of unknown function DUF339 family protein. (Os11t0528300-01)
indica	TIP_28891	Os04g0352400	OS04T0352400-01	0,018132858	0,544397769	0,106496448	up	R1	TIP	dry	126	0,817460317	chr04	16814964	DNAnona/MULE	chr04	16813905	16817974	-	FK506-binding protein, Peptidyl-prolyl cis/trans isomerase, Chilling tolerance (Os04t0352400-01)
indica	TIP_59074	Os09g0298200	OS09T0298200-01	0,018490361	0,555745018	0,106170377	up	R1	TIP	dry	126	0,150793651	chr09	7245533	DNAnona/MULE	chr09	7245434	7249813	-	Chloroplastic/amyloplastic ADP-glucose pyrophosphorylase small subunit 1, Starch synthesis in the early stage of developing endosperm (Os09t0298200-01);Similar to Brittle 2. (Os09t0298200-02)
indica	TIP_46491	Os07g0100800	OS07T0100800-01	0,018570712	0,326439976	0,106051092	up	R1	TIP	dry	126	0,452380952	chr07	54241	DNAauto/MULE	chr07	48787	53212	-	Proline (Pro) and &gamma;-aminobutyric acid (GABA) transporter, Stress tolerance, Cadmium stress tolerance (Os07t0100800-01)
indica	TIP_4827	Os01g0579900	OS01T0579900-01	0,018596054	-0,340906969	0,105933631	down	R1	TIP	dry	126	0,277777778	chr01	22439969	DNAnona/MULE	chr01	22439040	22441966	-	Esterase/lipase/thioesterase domain containing protein. (Os01t0579900-01)
indica	TIP_4829	Os01g0580000	OS01T0580000-02	0,018596054	0,326911241	0,105912708	up	R1	TIP	dry	126	0,650793651	chr01	22448510	DNAnona/MULE	chr01	22446210	22449819	-	Esterase/lipase/thioesterase domain containing protein. (Os01t0580000-01);Similar to esterase. (Os01t0580000-02)
indica	TIP_9723	Os01g0954000	OS01T0954000-01	0,018618624	0,623891005	0,105834188	up	R1	TIP	dry	126	0,119047619	chr01	42023200	LTR/Copia	chr01	42018073	42019444	+	NADPH-dependent FMN reductase family protein. (Os01t0954000-01)
indica	TIP_52059	Os07g0662900	OS07T0662900-01	0,018618624	-0,29739038	0,10577741	down	R1	TIP	dry	126	0,428571429	chr07	27970596	MITE/Stow	chr07	27960583	27968015	+	Similar to 4-alpha-glucanotransferase (EC 2.4.1.25). (Os07t0662900-01)
indica	TIP_15753	Os02g0635000	OS02T0635000-01	0,019000737	0,38956014	0,105442014	up	R1	TIP	dry	126	0,301587302	chr02	25459384	DNAnona/MULE	chr02	25459520	25462586	+	Nitrilase, Regulation of root growth (Os02t0635000-01)
indica	TIP_44465	Os06g0591200	OS06T0591200-01	0,019997124	0,456327158	0,104687694	up	R1	TIP	dry	126	0,174603175	chr06	23230667	DNAnona/hAT	chr06	23227138	23228388	+	Conserved hypothetical protein. (Os06t0591200-01)
indica	TIP_41203	Os06g0211300	OS06T0211300-01	0,020178887	0,320933252	0,104447682	up	R1	TIP	dry	126	0,523809524	chr06	5690171	MITE/Stow	chr06	5688697	5690594	+	Short-chain dehydrogenase/reductase SDR domain containing protein. (Os06t0211300-01)
indica	TIP_41205	Os06g0211300	OS06T0211300-01	0,020178887	0,320933252	0,104447682	up	R1	TIP	dry	126	0,523809524	chr06	5694954	DNAnona/MULEtir	chr06	5688697	5690594	+	Short-chain dehydrogenase/reductase SDR domain containing protein. (Os06t0211300-01)
indica	TIP_21585	Os03g0345700	OS03T0345700-01	0,020467729	-0,344086902	0,104196135	down	R1	TIP	dry	125	0,6	chr03	12909199	DNAnona/MULE	chr03	12906020	12907083	-	Similar to Heavy metal-associated domain containing protein, expressed. (Os03t0345700-01)
indica	TIP_50989	Os07g0573800	OS07T0573800-02	0,020976574	0,322988863	0,103767061	up	R1	TIP	dry	126	0,587301587	chr07	23199139	DNAnona/MULEtir	chr07	23194229	23199780	-	Similar to root border cell-specific protein. (Os07t0573800-01);FMN-binding split barrel domain containing protein. (Os07t0573800-02);FMN-binding split barrel domain containing protein. (Os07t0573800-03);Hypothetical protein. (Os07t0573800-04)
indica	TIP_27404	Os04g0121100	OS04T0121100-01	0,020976574	0,576488747	0,103746354	up	R1	TIP	dry	126	0,119047619	chr04	1249238	MITE/Tourist	chr04	1248450	1260282	+	Similar to OSIGBa0115D20.4 protein. (Os04t0121100-01)
indica	TIP_58641	Os09g0256700	OS09T0256700-01	0,021238354	0,417568844	0,103520098	up	R1	TIP	dry	121	0,578512397	chr09	4277788	MITE/Tourist	chr09	4277193	4277778	-	Conserved hypothetical protein. (Os09t0256700-01)
indica	TIP_10683	Os02g0162600	OS02T0162600-01	0,021401189	-0,591945626	0,103332353	down	R1	TIP	dry	124	0,225806452	chr02	3357366	DNAnona/MULE	chr02	3362047	3362944	+	Conserved hypothetical protein. (Os02t0162600-01)
indica	TIP_10877	Os02g0175000	OS02T0175000-01	0,021401189	-0,287637656	0,103263896	down	R1	TIP	dry	126	0,325396825	chr02	4105730	MITE/Tourist	chr02	4103387	4105657	+	Ion transporter , Na+ transport (Os02t0175000-01)
indica	TIP_38281	Os05g0467300	OS05T0467300-01	0,021401189	-0,439160487	0,103245441	down	R1	TIP	dry	126	0,849206349	chr05	22935653	MITE/Stow	chr05	22932713	22935696	+	SelT/selW/selH selenoprotein family protein. (Os05t0467300-01)
indica	TIP_27793	Os04g0188433	OS04T0188433-01	0,022318807	-0,815168887	0,102617026	down	R1	TIP	dry	126	0,896825397	chr04	5932236	DNAnona/MULE	chr04	5931193	5931871	-	Similar to OSIGBa0102N07.2 protein. (Os04t0188433-01)
indica	TIP_75488	Os12g0609500	OS12T0609500-01	0,022352986	0,384173462	0,10253998	up	R1	TIP	dry	126	0,26984127	chr12	25740122	MITE/Stow	chr12	25738156	25741105	-	Glucose/ribitol dehydrogenase family protein. (Os12t0609500-01)
indica	TIP_75787	Os12g0630100	OS12T0630100-01	0,023133129	0,433608773	0,102016445	up	R1	TIP	dry	123	0,756097561	chr12	26957394	LINE/unknown	chr12	26956203	26956894	-	Thaumatin protein, Tolerance to nitrogen deficiency (Os12t0630100-01)
indica	TIP_66310	Os10g0532800	OS10T0532800-02	0,023542742	-0,270084537	0,101721419	down	R1	TIP	dry	125	0,832	chr10	20714264	MITE/Tourist	chr10	20719171	20722927	-	Conserved hypothetical protein. (Os10t0532800-01);Conserved hypothetical protein. (Os10t0532800-02)
indica	TIP_30850	Os04g0498600	OS04T0498600-01	0,024050215	-0,415062241	0,101375107	down	R1	TIP	dry	126	0,865079365	chr04	24922760	LINE/unknown	chr04	24915054	24918786	+	S-adenosylmethionine decarboxylase, Polyamine biosynthesis, Salt and drought stresses, Abiotic stress (Os04t0498600-01);Similar to cDNA clone:J013002M21, full insert sequence. (Os04t0498600-02)
indica	TIP_24734	Os03g0676300	OS03T0676300-01	0,024601938	0,349722266	0,101010479	up	R1	TIP	dry	126	0,071428571	chr03	26742054	DNAnona/Tourist	chr03	26746815	26747658	+	Similar to cold shock protein-1. (Os03t0676300-01)
indica	TIP_39336	Os05g0546500	OS05T0546500-00	0,024837561	-0,305720614	0,100825367	down	R1	TIP	dry	126	0,293650794	chr05	27121709	MITE/Tourist	chr05	27124468	27125316	-	Similar to Cell death-related protein. (Os05t0546500-00)
indica	TIP_34322	Os05g0171200	OS05T0171200-01	0,025021188	0,721908482	0,100670004	up	R1	TIP	dry	113	0,92920354	chr05	4265140	LINE/unknown	chr05	4262642	4263449	+	Embryo-specific 3 family protein. (Os05t0171200-01)
indica	TIP_53229	Os08g0156600	OS08T0156600-01	0,026198751	-0,638204577	0,099955807	down	R1	TIP	dry	126	0,071428571	chr08	3284217	LTR/Copia	chr08	3281105	3284469	+	Vacuolar phosphate efflux transporter, Pi homeostasis (Os08t0156600-01);Similar to glycerol 3-phosphate permease. (Os08t0156600-02)
indica	TIP_67871	Os11g0184900	OS11T0184900-02	0,026198751	0,524171335	0,09987916	up	R1	TIP	dry	126	0,126984127	chr11	4298264	MITE/Stow	chr11	4299277	4301784	-	Similar to OsNAC5 protein [imported]-rice. (Os11t0184900-01);NAC-type transcription factor, Regulation of stress-inducible genes, Stress tolerance (Os11t0184900-02)
indica	TIP_67875	Os11g0184900	OS11T0184900-02	0,026198751	0,524171335	0,09987916	up	R1	TIP	dry	126	0,126984127	chr11	4306497	MITE/Tourist	chr11	4299277	4301784	-	Similar to OsNAC5 protein [imported]-rice. (Os11t0184900-01);NAC-type transcription factor, Regulation of stress-inducible genes, Stress tolerance (Os11t0184900-02)
indica	TIP_70525	Os11g0546300	OS11T0546300-01	0,026387252	-0,275310348	0,099727276	down	R1	TIP	dry	126	0,317460317	chr11	20149677	MITE/Stow	chr11	20144609	20147897	-	Patatin family protein. (Os11t0546300-01)
indica	TIP_60738	Os09g0438100	OS09T0438100-01	0,027131618	-1,080255438	0,099285781	down	R1	TIP	dry	126	0,031746032	chr09	16202782	MITE/Tourist	chr09	16200946	16201902	-	Conserved hypothetical protein. (Os09t0438100-01)
indica	TIP_537	Os01g0151400	OS01T0151400-01	0,027131618	-0,285017999	0,099240106	down	R1	TIP	dry	126	0,603174603	chr01	2780858	DNAnona/MULE	chr01	2776973	2781723	+	Similar to Gamma-glutamyl transferase. (Os01t0151400-01)
indica	TIP_70897	Os11g0602400	OS11T0602400-01	0,027314473	0,261384099	0,099094983	up	R1	TIP	dry	126	0,174603175	chr11	23179078	MITE/Stow	chr11	23176608	23178790	+	tRNA intron endonuclease, catalytic domain-like domain containing protein. (Os11t0602400-01)
indica	TIP_26869	Os03g0829100	OS03T0829100-01	0,02801051	-0,181602174	0,098698205	down	R1	TIP	dry	126	0,714285714	chr03	34827571	MITE/Stow	chr03	34820687	34823529	-	Similar to Soluble epoxide hydrolase. (Os03t0829100-01);Similar to epoxide hydrolase 2. (Os03t0829100-02)
indica	TIP_71298	Os11g0649300	OS11T0649300-01	0,029059628	0,23309071	0,098143035	up	R1	TIP	dry	125	0,48	chr11	25881462	DNAnona/Helitron	chr11	25877770	25882187	-	Hypothetical conserved gene. (Os11t0649300-01)
indica	TIP_8791	Os01g0885000	OS01T0885000-01	0,03102501	-0,14263517	0,097196154	down	R1	TIP	dry	126	0,714285714	chr01	38446502	MITE/Stow	chr01	38443627	38446419	+	Similar to Cytochrome c. (Os01t0885000-01);Similar to Cytochrome c. (Os01t0885000-02)
indica	TIP_32311	Os04g0606000	OS04T0606000-01	0,031181129	0,519787817	0,097074909	up	R1	TIP	dry	126	0,857142857	chr04	30607289	SINE/unknown	chr04	30608872	30610396	-	Transferase family protein. (Os04t0606000-01)
indica	TIP_2028	Os01g0250900	OS01T0250900-01	0,031267586	0,312271177	0,096984613	up	R1	TIP	dry	125	0,704	chr01	8273833	DNAnona/hAT	chr01	8275474	8283959	+	HAD superfamily (subfamily IG) hydrolase, 5'-Nucleotidase protein. (Os01t0250900-01)
indica	TIP_13783	Os02g0494400	OS02T0494400-01	0,033474271	0,420157758	0,096000207	up	R1	TIP	dry	126	0,111111111	chr02	17340551	MITE/Tourist	chr02	17327569	17335567	-	Ankyrin (ANK)- tetratricopeptide repeat (TPR) domain containing protein, Control of panicle architecture (Os02t0494400-01)
indica	TIP_73411	Os12g0291733	OS12T0291733-00	0,034397714	0,600347846	0,095576033	up	R1	TIP	dry	126	0,142857143	chr12	11278438	MITE/Stow	chr12	11277307	11278105	-	Hypothetical gene. (Os12t0291733-00)
indica	TIP_9861	Os01g0966400	OS01T0966400-01	0,034442625	0,404724962	0,095506295	up	R1	TIP	dry	126	0,825396825	chr01	42613785	MITE/Stow	chr01	42618478	42621704	-	Leucine-rich repeat, SDS22 containing protein. (Os01t0966400-01)
indica	TIP_24732	Os03g0675700	OS03T0675700-01	0,034753194	0,582431012	0,095331834	up	R1	TIP	dry	126	0,071428571	chr03	26733768	DNAnona/MULE	chr03	26733986	26736205	+	Conserved hypothetical protein. (Os03t0675700-01)
indica	TIP_68142	Os11g0216100	OS11T0216100-01	0,035135147	-0,294238484	0,09513083	down	R1	TIP	dry	126	0,706349206	chr11	6066143	SINE/unknown	chr11	6065311	6066797	-	Similar to Heat shock protein binding protein. (Os11t0216100-01)
indica	TIP_165	Os01g0116900	OS01T0116900-00	0,035730668	-0,340492205	0,094849614	down	R1	TIP	dry	126	0,19047619	chr01	924276	DNAnona/CACTA	chr01	924451	956639	+	Protein kinase, catalytic domain domain containing protein. (Os01t0116900-00)
indica	TIP_32823	Os04g0647300	OS04T0647300-01	0,036469009	-0,439752702	0,094518674	down	R1	TIP	dry	126	0,968253968	chr04	32931075	MITE/Stow	chr04	32933242	32937209	-	Similar to H0811D08.10 protein. (Os04t0647300-01)
indica	TIP_40856	Os06g0184800	OS06T0184800-01	0,036773357	0,338236339	0,094354018	up	R1	TIP	dry	126	0,301587302	chr06	4265494	DNAnona/hAT	chr06	4264424	4265115	-	Similar to Low-temperature induced protein lt101.1 (Blt101) (Blt101.1). (Os06t0184800-01)
indica	TIP_30161	Os04g0444800	OS04T0444800-02	0,037760456	-0,328714232	0,093940798	down	R1	TIP	dry	126	0,285714286	chr04	22178828	DNAnona/MULE	chr04	22182599	22186919	+	Ferric reductase oxidase, Fe homeostasis, Salt stress response (Os04t0444800-01);Ferric reductase-like transmembrane component family protein. (Os04t0444800-02)
indica	TIP_70541	Os11g0550900	OS11T0550900-01	0,038708535	0,390290496	0,093550839	up	R1	TIP	dry	122	0,860655738	chr11	20483509	MITE/Tourist	chr11	20482685	20488052	-	Conserved hypothetical protein. (Os11t0550900-01)
indica	TIP_61959	Os09g0528700	OS09T0528700-00	0,039739325	-0,178882097	0,093140694	down	R1	TIP	dry	126	0,523809524	chr09	20696476	LTR/Copia	chr09	20691369	20693116	+	Similar to Cytochrome p450 (CYP78A9). (Os09t0528700-00)
indica	TIP_48173	Os07g0227600	OS07T0227600-00	0,040186138	0,638443421	0,092910709	up	R1	TIP	dry	126	0,03968254	chr07	7138323	DNAauto/MULE	chr07	7139927	7140775	-	Pathogenesis-related transcriptional factor/ERF, DNA-binding domain containing protein. (Os07t0227600-00)
indica	TIP_45220	Os06g0643100	OS06T0643100-01	0,040186138	0,285181618	0,092887342	up	R1	TIP	dry	109	0,678899083	chr06	26198728	DNAnona/Helitron	chr06	26199409	26202782	-	Proteasome subunit beta type 3 (EC 3.4.25.1) (20S proteasome alpha subunit C) (20S proteasome subunit beta-3). (Os06t0643100-01)
indica	TIP_27018	Os03g0843700	OS03T0843700-01	0,040651059	0,2559638	0,092679982	up	R1	TIP	dry	126	0,444444444	chr03	35470803	MITE/Tourist	chr03	35462177	35466386	+	FAR1 domain containing protein. (Os03t0843700-01)
indica	TIP_30135	Os04g0443900	OS04T0443900-01	0,042797886	-0,344347772	0,09192555	down	R1	TIP	dry	126	0,238095238	chr04	22115469	LINE/unknown	chr04	22118247	22122536	-	Similar to RuBisCO large subunit-binding protein subunit beta, chloroplastic. (Os04t0443900-01)
indica	TIP_32657	Os04g0630400	OS04T0630400-01	0,043368454	-0,44526215	0,091694627	down	R1	TIP	dry	126	0,738095238	chr04	32061496	MITE/Tourist	chr04	32063756	32065731	+	NAD(P)-binding domain containing protein. (Os04t0630400-01)
indica	TIP_70582	Os11g0555600	OS11T0555600-01	0,044266152	0,280546128	0,091364623	up	R1	TIP	dry	125	0,76	chr11	20654362	DNAnona/MULEtir	chr11	20651030	20654076	-	Protein kinase, core domain containing protein. (Os11t0555600-01)
indica	TIP_15685	Os02g0629200	OS02T0629200-01	0,045082603	-0,545009286	0,091065057	down	R1	TIP	dry	126	0,063492063	chr02	25167033	DNAauto/MULE	chr02	25162876	25166544	+	Similar to cDNA clone:001-039-E03, full insert sequence. (Os02t0629200-01);PLASMA MEMBRANE INTRINSIC PROTEIN (PIP) family of aquaporin, Water-transporting facilitator across cell membranes, Maintenance of the cell membrane integrity, Drought tolerance (Os02t0629200-02)
indica	TIP_30305	Os04g0455700	OS04T0455700-00	0,045842789	-0,245972384	0,090786934	down	R1	TIP	dry	126	0,912698413	chr04	22803013	LTR/Gypsy	chr04	22800689	22801366	-	Similar to H0523F07.3 protein. (Os04t0455700-00)
indica	TIP_66314	Os10g0532800	OS10T0532800-02	0,04586127	-0,199242551	0,09072574	down	R1	TIP	dry	126	0,650793651	chr10	20722579	DNAnona/Helitron	chr10	20719171	20722927	-	Conserved hypothetical protein. (Os10t0532800-01);Conserved hypothetical protein. (Os10t0532800-02)
indica	TIP_66841	Os10g0567800	OS10T0567800-02	0,04586127	0,386290146	0,090683887	up	R1	TIP	dry	126	0,865079365	chr10	22507805	SINE/unknown	chr10	22504534	22510131	-	Similar to Dynamin-related protein 1E (Dynamin-like protein E) (Dynamin-like protein 4) (Dynamin-like protein DLP2). (Os10t0567800-01);Similar to predicted protein. (Os10t0567800-02)
indica	TIP_1844	Os01g0238200	OS01T0238200-01	0,045929953	0,339874201	0,090614876	up	R1	TIP	dry	126	0,682539683	chr01	7656616	DNAnona/hAT	chr01	7652967	7656516	-	Conserved hypothetical protein. (Os01t0238200-01);Conserved hypothetical protein. (Os01t0238200-02)
indica	TIP_58637	Os09g0256100	OS09T0256100-00	0,047483819	0,193598486	0,090110582	up	R1	TIP	dry	125	0,52	chr09	4250407	LTR/TRIM	chr09	4250749	4251832	+	Similar to flavonol 4-sulfotransferase. (Os09t0256100-00)
indica	TIP_49840	Os07g0480900	OS07T0480900-01	0,047512771	0,202736927	0,090054053	up	R1	TIP	dry	125	0,472	chr07	17496454	MITE/Tourist	chr07	17496502	17498002	+	Similar to Cysteine protease (Fragment). (Os07t0480900-01)
indica	TIP_56989	Os08g0497900	OS08T0497900-01	0,047639124	-0,40742891	0,089969647	down	R1	TIP	dry	126	0,952380952	chr08	24577063	DNAnona/MULE	chr08	24581335	24583695	-	Conserved hypothetical protein. (Os08t0497900-01)
indica	TIP_64409	Os10g0389300	OS10T0389300-01	0,047993018	-0,461900464	0,089820361	down	R1	TIP	dry	126	0,936507937	chr10	12899072	MITE/Stow	chr10	12890904	12894595	-	Similar to Red chlorophyll catabolite reductase (Fragment). (Os10t0389300-01);Red chlorophyll catabolite reductase (Os10t0389300-02)
indica	TIP_5156	Os01g0603000	OS01T0603000-01	0,048170413	0,684733904	0,089722113	up	R1	TIP	dry	126	0,952380952	chr01	23747771	MITE/Stow	chr01	23740879	23744974	-	Similar to Nuclear RNA binding protein A. (Os01t0603000-01)
indica	TIP_7675	Os01g0795832	OS01T0795832-00	0,048300438	-0,18067252	0,089637649	down	R1	TIP	dry	126	0,666666667	chr01	33709051	MITE/Stow	chr01	33708780	33709258	+	Conserved hypothetical protein. (Os01t0795832-00)
indica	TIP_10742	Os02g0166600	OS02T0166600-01	0,049565934	0,400173075	0,089235743	up	R1	TIP	dry	123	0,861788618	chr02	3581981	MITE/Tourist	chr02	3580321	3581706	+	Hypothetical protein. (Os02t0166600-01)
indica	TIP_7449	Os01g0771300	OS01T0771300-01	0,049960297	0,219469997	0,089037453	up	R1	TIP	dry	126	0,158730159	chr01	32544426	DNAnona/hAT	chr01	32547110	32547706	-	Hypothetical protein. (Os01t0771300-01)
indica	TIP_6240	Os01g0678100	OS01T0678100-01	0,049960297	0,308304651	0,089032863	up	R1	TIP	dry	126	0,587301587	chr01	27879787	DNAnona/MULE	chr01	27883020	27886068	+	Protein of unknown function DUF2921 domain containing protein. (Os01t0678100-01)
indica	TIP_41765	Os06g0254600	OS06T0254600-01	1,79954E-12	-1,154238784	0,429319763	down	R2	TIP	dry	126	0,46031746	chr06	7995374	MITE/Tourist	chr06	7996917	8004842	-	Caleosin related family protein. (Os06t0254600-01)
indica	TIP_3390	Os01g0352100	OS01T0352100-01	1,86332E-12	-1,457728708	0,422649884	down	R2	TIP	dry	126	0,73015873	chr01	14098954	LINE/unknown	chr01	14101994	14108083	+	2OG-Fe(II) oxygenase domain containing protein. (Os01t0352100-01)
indica	TIP_70824	Os11g0595200	OS11T0595200-01	9,79686E-11	-1,085203022	0,381008642	down	R2	TIP	dry	126	0,603174603	chr11	22661298	DNAnona/MULE	chr11	22660534	22662341	+	PAP fibrillin family protein. (Os11t0595200-01)
indica	TIP_3391	Os01g0352100	OS01T0352100-01	1,53766E-09	-1,27425364	0,350312974	down	R2	TIP	dry	126	0,69047619	chr01	14102762	DNAnona/Helitron	chr01	14101994	14108083	+	2OG-Fe(II) oxygenase domain containing protein. (Os01t0352100-01)
indica	TIP_75781	Os12g0628100	OS12T0628100-01	7,93665E-08	-2,128634198	0,305872939	down	R2	TIP	dry	126	0,896825397	chr12	26892919	MITE/Tourist	chr12	26888810	26890166	-	Similar to Actin-depolymerizing factor 6 (ADF-6) (AtADF6). (Os12t0628100-01)
indica	TIP_70825	Os11g0595200	OS11T0595200-01	9,63402E-08	-0,944927717	0,301722374	down	R2	TIP	dry	126	0,5	chr11	22662221	MITE/Tourist	chr11	22660534	22662341	+	PAP fibrillin family protein. (Os11t0595200-01)
indica	TIP_67392	Os11g0150800	OS11T0150800-01	3,34942E-07	0,36269743	0,286064546	up	R2	TIP	dry	124	0,072580645	chr11	2363757	DNAnona/MULEtir	chr11	2363882	2364482	+	Hypothetical protein. (Os11t0150800-01)
indica	TIP_19871	Os03g0219200	OS03T0219200-01	6,20597E-07	-0,653926065	0,277540016	down	R2	TIP	dry	126	0,111111111	chr03	6275388	DNAnona/MULE	chr03	6271895	6275386	-	CuZn superoxide dismutase, Response to salinity, drought, and oxidative stress (Os03t0219200-01)
indica	TIP_29623	Os04g0405401	OS04T0405401-01	7,16076E-07	0,410270459	0,274553579	up	R2	TIP	dry	120	0,2	chr04	20119077	DNAnona/Helitron	chr04	20117097	20119136	-	Hypothetical conserved gene. (Os04t0405401-01)
indica	TIP_26201	Os03g0774600	OS03T0774600-01	1,20614E-06	1,118505529	0,267332048	up	R2	TIP	dry	126	0,920634921	chr03	32108992	DNAnona/MULE	chr03	32113298	32113796	+	Conserved hypothetical protein. (Os03t0774600-01)
indica	TIP_64322	Os10g0378100	OS10T0378100-01	1,72921E-06	-0,873884824	0,262041327	down	R2	TIP	dry	126	0,214285714	chr10	12094053	DNAauto/CACTA	chr10	12090264	12098560	-	Similar to Cytochrome P450 family protein, expressed. (Os10t0378100-01)
indica	TIP_542	Os01g0152700	OS01T0152700-01	1,76311E-06	-0,724172448	0,260800258	down	R2	TIP	dry	126	0,285714286	chr01	2837603	SINE/unknown	chr01	2837892	2838171	-	Similar to Histone H2B (CaH2B). (Os01t0152700-01)
indica	TIP_543	Os01g0152700	OS01T0152700-01	3,9868E-06	0,688324658	0,250163595	up	R2	TIP	dry	126	0,682539683	chr01	2839521	LINE/unknown	chr01	2837892	2838171	-	Similar to Histone H2B (CaH2B). (Os01t0152700-01)
indica	TIP_47761	Os07g0196200	OS07T0196200-01	3,9868E-06	-0,933554632	0,249399136	down	R2	TIP	dry	126	0,373015873	chr07	5219381	DNAauto/MULE	chr07	5216029	5217014	-	Protein of unknown function DUF3252 domain containing protein. (Os07t0196200-01)
indica	TIP_49742	Os07g0475000	OS07T0475000-01	5,17347E-06	-0,777144358	0,244819862	down	R2	TIP	dry	126	0,150793651	chr07	17140585	LTR/Copia	chr07	17136166	17144612	+	Conserved hypothetical protein. (Os07t0475000-01)
indica	TIP_51011	Os07g0575600	OS07T0575600-02	5,17347E-06	0,434375267	0,244721637	up	R2	TIP	dry	126	0,071428571	chr07	23282622	MITE/Stow	chr07	23278788	23281103	-	Similar to Lectin receptor-type kinase. (Os07t0575600-01);Similar to Lectin-like receptor kinase 7;2. (Os07t0575600-02)
indica	TIP_2555	Os01g0286100	OS01T0286100-01	5,33865E-06	-0,742770363	0,243625205	down	R2	TIP	dry	126	0,238095238	chr01	10275976	LTR/Gypsy	chr01	10271157	10274304	-	Phytochrome-interacting factor-like protein, Basic helix-loop-helix factor, Repression of seedling growth in the dark (Os01t0286100-01)
indica	TIP_46627	Os07g0110800	OS07T0110800-01	1,69206E-05	0,758010044	0,229069874	up	R2	TIP	dry	108	0,638888889	chr07	606924	MITE/Tourist	chr07	604586	607425	-	Conserved hypothetical protein. (Os07t0110800-01)
indica	TIP_40181	Os06g0124900	OS06T0124900-01	1,93658E-05	-0,885757042	0,226774586	down	R2	TIP	dry	126	0,904761905	chr06	1343058	DNAnona/hAT	chr06	1341610	1344490	+	Conserved hypothetical protein. (Os06t0124900-01)
indica	TIP_2107	Os01g0256500	OS01T0256500-02	4,39375E-05	1,500830456	0,215780309	up	R2	TIP	dry	110	0,909090909	chr01	8542846	MITE/Stow	chr01	8546065	8546869	-	Similar to ZnI. (Os01t0256500-02)
indica	TIP_44232	Os06g0564500	OS06T0564500-01	4,39375E-05	-0,875909298	0,215525171	down	R2	TIP	dry	123	0,918699187	chr06	21705452	DNAnona/Tourist	chr06	21700599	21703282	-	Cysteine synthase (EC 4.2.99.8). (Os06t0564500-01)
indica	TIP_5273	Os01g0611300	OS01T0611300-01	7,81074E-05	-0,270894759	0,207834438	down	R2	TIP	dry	126	0,642857143	chr01	24196234	DNAnona/MULE	chr01	24195504	24196616	+	Similar to Metal tolerance protein 7. (Os01t0611300-01)
indica	TIP_58942	Os09g0287500	OS09T0287500-01	0,000108259	-0,552393624	0,20321597	down	R2	TIP	dry	125	0,688	chr09	6437899	DNAnona/Helitron	chr09	6439640	6441905	-	Protein of unknown function DUF565 family protein. (Os09t0287500-01)
indica	TIP_169	Os01g0116900	OS01T0116900-00	0,000143433	0,642044587	0,199163679	up	R2	TIP	dry	123	0,146341463	chr01	937226	MITE/Tourist	chr01	924451	956639	+	Protein kinase, catalytic domain domain containing protein. (Os01t0116900-00)
indica	TIP_16897	Os02g0721100	OS02T0721100-01	0,000179864	0,419868336	0,195807976	up	R2	TIP	dry	126	0,198412698	chr02	29918000	DNAauto/MULE	chr02	29919262	29920338	-	Similar to E2 ubiquitin-conjugating enzyme UbcH5B (Fragment). (Os02t0721100-01)
indica	TIP_40623	Os06g0159900	OS06T0159900-01	0,000190721	0,460490661	0,194227801	up	R2	TIP	dry	126	0,238095238	chr06	3059828	MITE/Stow	chr06	3051248	3055005	+	Similar to Arm repeat containing protein. (Os06t0159900-01)
indica	TIP_49904	Os07g0486500	OS07T0486500-02	0,000190721	-0,474489482	0,194100463	down	R2	TIP	dry	126	0,484126984	chr07	17912109	MITE/Tourist	chr07	17907341	17912298	+	RhoGAP domain containing protein. (Os07t0486500-01);RhoGAP domain containing protein. (Os07t0486500-02)
indica	TIP_3392	Os01g0352100	OS01T0352100-01	0,000211669	-0,889249621	0,192326626	down	R2	TIP	dry	126	0,595238095	chr01	14103644	DNAnona/Helitron	chr01	14101994	14108083	+	2OG-Fe(II) oxygenase domain containing protein. (Os01t0352100-01)
indica	TIP_61803	Os09g0517000	OS09T0517000-01	0,000359484	0,662127686	0,185167391	up	R2	TIP	dry	126	0,841269841	chr09	20157583	MITE/Stow	chr09	20156455	20157191	+	Conserved hypothetical protein. (Os09t0517000-01)
indica	TIP_8592	Os01g0869800	OS01T0869800-01	0,000590324	0,422406209	0,178401502	up	R2	TIP	dry	126	0,079365079	chr01	37695386	DNAauto/MULE	chr01	37697024	37699582	+	22-kDa Photosystem II protein, Photoprotection (Os01t0869800-01)
indica	TIP_62380	Os09g0560800	OS09T0560800-01	0,000869604	-0,516279861	0,17300395	down	R2	TIP	dry	126	0,76984127	chr09	22284693	MITE/Stow	chr09	22281491	22284167	+	Molybdenum cofactor sulfurase, C-terminal domain containing protein. (Os09t0560800-01)
indica	TIP_38559	Os05g0488000	OS05T0488000-01	0,001007686	-0,542761288	0,170694082	down	R2	TIP	dry	126	0,761904762	chr05	23996139	DNAnona/MULE	chr05	23996148	23997293	+	Peptidase C1A, papain family protein. (Os05t0488000-01)
indica	TIP_40475	Os06g0146800	OS06T0146800-01	0,001070495	-0,376353415	0,169515541	down	R2	TIP	dry	125	0,896	chr06	2453895	MITE/Tourist	chr06	2449205	2449822	-	Conserved hypothetical protein. (Os06t0146800-01)
indica	TIP_24695	Os03g0673600	OS03T0673600-01	0,0011564	1,085978575	0,168131094	up	R2	TIP	dry	124	0,274193548	chr03	26618960	DNAnona/hAT	chr03	26617086	26618211	-	Conserved hypothetical protein. (Os03t0673600-01)
indica	TIP_4852	Os01g0581300	OS01T0581300-01	0,001240255	0,453154587	0,166849115	up	R2	TIP	dry	126	0,5	chr01	22535541	SINE/unknown	chr01	22535013	22538645	+	Lycopene epsilon-cyclase (Os01t0581300-01)
indica	TIP_24695	Os03g0673700	OS03T0673700-01	0,00146881	0,519292976	0,164289274	up	R2	TIP	dry	124	0,274193548	chr03	26618960	DNAnona/hAT	chr03	26622941	26623429	+	Similar to predicted protein. (Os03t0673700-01)
indica	TIP_34317	Os05g0170950	OS05T0170950-00	0,001475622	-0,426928352	0,163611028	down	R2	TIP	dry	126	0,531746032	chr05	4252043	DNAnona/Helitron	chr05	4254052	4254939	+	Similar to Plastid phosphoenolpyruvate/phosphate translocator. (Os05t0170950-00)
indica	TIP_3413	Os01g0355800	OS01T0355800-00	0,001475622	0,285561734	0,163526572	up	R2	TIP	dry	124	0,080645161	chr01	14322251	MITE/Stow	chr01	14326183	14327100	+	Similar to Esterase PIR7A. (Os01t0355800-00)
indica	TIP_67485	Os11g0155600	OS11T0155600-01	0,001881132	-0,611978058	0,160027037	down	R2	TIP	dry	126	0,246031746	chr11	2606655	MITE/Tourist	chr11	2605752	2614119	-	Conserved hypothetical protein. (Os11t0155600-01)
indica	TIP_24692	Os03g0673600	OS03T0673600-01	0,002001545	-1,003684937	0,158887047	down	R2	TIP	dry	126	0,682539683	chr03	26616395	MITE/Tourist	chr03	26617086	26618211	-	Conserved hypothetical protein. (Os03t0673600-01)
indica	TIP_26679	Os03g0811500	OS03T0811500-01	0,002145833	-0,469450374	0,157655176	down	R2	TIP	dry	126	0,785714286	chr03	33987228	MITE/Tourist	chr03	33988216	33991906	-	Zinc finger, HIT-type domain containing protein. (Os03t0811500-01)
indica	TIP_67604	Os11g0162700	OS11T0162700-02	0,00240433	0,229471319	0,155852031	up	R2	TIP	dry	125	0,272	chr11	3058100	DNAnona/Helitron	chr11	3058267	3062680	-	Hypothetical conserved gene. (Os11t0162700-01);Hypothetical conserved gene. (Os11t0162700-02)
indica	TIP_60553	Os09g0428900	OS09T0428900-01	0,003335272	0,723567209	0,15124957	up	R2	TIP	dry	112	0,071428571	chr09	15587803	LINE/unknown	chr09	15583194	15586475	+	Similar to Conserved protein. (Os09t0428900-01)
indica	TIP_40855	Os06g0184800	OS06T0184800-01	0,00348802	-0,538788676	0,150358283	down	R2	TIP	dry	126	0,785714286	chr06	4260021	MITE/Stow	chr06	4264424	4265115	-	Similar to Low-temperature induced protein lt101.1 (Blt101) (Blt101.1). (Os06t0184800-01)
indica	TIP_40866	Os06g0185900	OS06T0185900-01	0,004105182	-0,657320079	0,147916516	down	R2	TIP	dry	118	0,06779661	chr06	4320286	MITE/Tourist	chr06	4321654	4325071	+	Similar to Glutathione peroxidase. (Os06t0185900-01)
indica	TIP_63	Os01g0105900	OS01T0105900-01	0,004828959	-0,536304111	0,145483125	down	R2	TIP	dry	126	0,174603175	chr01	312684	MITE/Tourist	chr01	309520	313170	-	PfkB carbohydrate kinase protein, Regulation of plant height and leaf structure (Os01t0105900-01)
indica	TIP_41204	Os06g0211300	OS06T0211300-01	0,004897314	0,399025405	0,145013145	up	R2	TIP	dry	119	0,571428571	chr06	5691350	DNAauto/POLE	chr06	5688697	5690594	+	Short-chain dehydrogenase/reductase SDR domain containing protein. (Os06t0211300-01)
indica	TIP_52722	Os08g0114100	OS08T0114100-01	0,005000403	0,273120012	0,144459363	up	R2	TIP	dry	123	0,569105691	chr08	749664	DNAnona/MULE	chr08	751421	753191	+	Green tissues expressed protein (Os08t0114100-01)
indica	TIP_40867	Os06g0185900	OS06T0185900-01	0,00543852	-0,644985974	0,143075146	down	R2	TIP	dry	126	0,063492063	chr06	4322394	DNAnona/Helitron	chr06	4321654	4325071	+	Similar to Glutathione peroxidase. (Os06t0185900-01)
indica	TIP_31987	Os04g0580800	OS04T0580800-01	0,009011129	-0,621349962	0,136101685	down	R2	TIP	dry	126	0,968253968	chr04	29316624	SINE/unknown	chr04	29317364	29318451	-	Zinc finger, RING/FYVE/PHD-type domain containing protein. (Os04t0580800-01)
indica	TIP_60	Os01g0105900	OS01T0105900-01	0,009054546	-0,527431132	0,135604614	down	R2	TIP	dry	126	0,166666667	chr01	305239	DNAauto/MLE	chr01	309520	313170	-	PfkB carbohydrate kinase protein, Regulation of plant height and leaf structure (Os01t0105900-01)
indica	TIP_65	Os01g0105900	OS01T0105900-01	0,009054546	0,492715469	0,135515236	up	R2	TIP	dry	126	0,801587302	chr01	317978	MITE/Stow	chr01	309520	313170	-	PfkB carbohydrate kinase protein, Regulation of plant height and leaf structure (Os01t0105900-01)
indica	TIP_98	Os01g0108400	OS01T0108400-00	0,010332722	-0,44042574	0,133500507	down	R2	TIP	dry	126	0,587301587	chr01	457422	MITE/Stow	chr01	455707	457425	+	Helix-loop-helix DNA-binding domain containing protein. (Os01t0108400-00)
indica	TIP_24551	Os03g0662000	OS03T0662000-01	0,01290965	-0,597930487	0,130275658	down	R2	TIP	dry	126	0,968253968	chr03	26004551	LINE/unknown	chr03	25999703	26004567	+	Similar to Dihydrolipoyl dehydrogenase, mitochondrial precursor (EC 1.8.1.4) (Glycine cleavage system L protein) (Dihydrolipoamide dehydrogenase). (Os03t0662000-01)
indica	TIP_34204	Os05g0161500	OS05T0161500-01	0,013723145	-0,527295204	0,129212202	down	R2	TIP	dry	126	0,349206349	chr05	3628628	DNAnona/hAT	chr05	3626394	3629080	+	Calcium-activated (p)ppGpp synthetase, Ca<sup>2+</sup>-activated RelA-SpoT homolog 2 (Os05t0161500-01)
indica	TIP_30208	Os04g0447600	OS04T0447600-01	0,018607466	-0,637675622	0,124587548	down	R2	TIP	dry	126	0,968253968	chr04	22319053	DNAnona/hAT	chr04	22321302	22323516	+	Similar to NADPH-dependent codeinone reductase (EC 1.1.1.247). (Os04t0447600-01)
indica	TIP_58769	Os09g0270900	OS09T0270900-02	0,018607466	0,395992297	0,124534261	up	R2	TIP	dry	119	0,218487395	chr09	5312050	LTR/Gypsy	chr09	5306896	5309044	-	BolA-like protein domain containing protein. (Os09t0270900-01);Similar to EMB1374. (Os09t0270900-02)
indica	TIP_66361	Os10g0536100	OS10T0536100-01	0,018607466	0,804854814	0,124277772	up	R2	TIP	dry	124	0,89516129	chr10	20863697	DNAauto/PILE	chr10	20863187	20873635	+	MIKC-type MADS-box protein, Long day (LD)-specific negative regulator of flowering (Os10t0536100-01)
indica	TIP_46611	Os07g0109700	OS07T0109700-01	0,018607466	-0,640128543	0,124185922	down	R2	TIP	dry	126	0,126984127	chr07	537085	LTR/Gypsy	chr07	536836	537792	-	Conserved hypothetical protein. (Os07t0109700-01)
indica	TIP_29625	Os04g0405401	OS04T0405401-01	0,021555843	-0,236301815	0,121981499	down	R2	TIP	dry	126	0,714285714	chr04	20122884	MITE/Tourist	chr04	20117097	20119136	-	Hypothetical conserved gene. (Os04t0405401-01)
indica	TIP_16730	Os02g0708000	OS02T0708000-01	0,021983839	-0,393279136	0,121477398	down	R2	TIP	dry	126	0,928571429	chr02	29257301	DNAauto/POLE	chr02	29259387	29260291	+	Conserved hypothetical protein. (Os02t0708000-01)
indica	TIP_27051	Os03g0846400	OS03T0846400-01	0,021983839	-0,788585427	0,121059766	down	R2	TIP	dry	126	0,126984127	chr03	35585064	DNAnona/hAT	chr03	35589787	35596069	+	Peptidase, trypsin-like serine and cysteine domain containing protein. (Os03t0846400-01)
indica	TIP_27055	Os03g0846400	OS03T0846400-01	0,021983839	-0,788585427	0,121059766	down	R2	TIP	dry	126	0,126984127	chr03	35595754	DNAauto/MULE	chr03	35589787	35596069	+	Peptidase, trypsin-like serine and cysteine domain containing protein. (Os03t0846400-01)
indica	TIP_53901	Os08g0227200	OS08T0227200-02	0,022082546	0,284139681	0,120787264	up	R2	TIP	dry	126	0,349206349	chr08	7756290	DNAnona/hAT	chr08	7760699	7762222	-	Kelch related domain containing protein. (Os08t0227200-02)
indica	TIP_30503	Os04g0469000	OS04T0469000-01	0,022355702	0,48573532	0,120412702	up	R2	TIP	dry	124	0,274193548	chr04	23422612	LTR/Copia	chr04	23422508	23423336	-	Heavy metal-associated isoprenylated plant protein 19, Putative virulence target, Disease resistance (Os04t0469000-01)
indica	TIP_22323	Os03g0396900	OS03T0396900-02	0,022607754	-0,354551778	0,120055822	down	R2	TIP	dry	126	0,920634921	chr03	16046417	SINE/unknown	chr03	16039012	16045538	+	Hypothetical conserved gene. (Os03t0396900-01);Similar to PIMT. (Os03t0396900-02)
indica	TIP_162	Os01g0115700	OS01T0115700-00	0,029410427	-0,313190126	0,116302391	down	R2	TIP	dry	122	0,401639344	chr01	853367	LINE/unknown	chr01	851835	854599	-	Receptor-like kinase 19 (Os01t0115700-01)
indica	TIP_7634	Os01g0788400	OS01T0788400-01	0,029949899	-0,54917827	0,115824174	down	R2	TIP	dry	126	0,968253968	chr01	33450849	MITE/Stow	chr01	33453435	33460079	+	Pectin methylesterase, Leaf senescence regulation (Os01t0788400-01)
indica	TIP_41037	Os06g0202300	OS06T0202300-01	0,029949899	-1,138304809	0,115659105	down	R2	TIP	dry	126	0,031746032	chr06	5158333	MITE/Tourist	chr06	5158231	5165171	+	Conserved hypothetical protein. (Os06t0202300-01)
indica	TIP_41619	Os06g0241100	OS06T0241100-01	0,030860692	0,299347552	0,115042725	up	R2	TIP	dry	119	0,277310924	chr06	7329511	DNAnona/MULE	chr06	7325616	7327449	-	Membrane-associated kinase-5, Response to drought stress in tolerant genotype, Response to submergence (Os06t0241100-01)
indica	TIP_62415	Os09g0565300	OS09T0565300-01	0,030860692	0,795579566	0,114867563	up	R2	TIP	dry	126	0,031746032	chr09	22504553	DNAauto/hAT	chr09	22507900	22510149	-	Similar to RING-finger protein. (Os09t0565300-01)
indica	TIP_4554	Os01g0552300	OS01T0552300-01	0,033296326	0,290840695	0,11365032	up	R2	TIP	dry	126	0,76984127	chr01	20739631	MITE/Tourist	chr01	20738654	20742427	+	Similar to Protein phosphatase-2C. (Os01t0552300-01)
indica	TIP_73411	Os12g0291733	OS12T0291733-00	0,039801223	0,642153706	0,111045597	up	R2	TIP	dry	126	0,142857143	chr12	11278438	MITE/Stow	chr12	11277307	11278105	-	Hypothetical gene. (Os12t0291733-00)
indica	TIP_12345	Os02g0282100	OS02T0282100-01	0,040201579	-0,375572065	0,110725351	down	R2	TIP	dry	126	0,587301587	chr02	10510080	MITE/Stow	chr02	10509169	10512214	-	Conserved hypothetical protein. (Os02t0282100-01)
indica	TIP_42765	Os06g0342200	OS06T0342200-01	0,041626259	0,776480322	0,110070838	up	R2	TIP	dry	123	0,967479675	chr06	13687497	MITE/Stow	chr06	13685423	13686169	+	Translation initiation factor 1A (Os06t0342200-01)
indica	TIP_29156	Os04g0379900	OS04T0379900-01	0,041785367	-0,457863385	0,10966194	down	R2	TIP	dry	126	0,238095238	chr04	18559927	SINE/unknown	chr04	18560190	18564376	-	Similar to Acyl-[acyl-carrier-protein] desaturase, chloroplast precursor (EC 1.14.19.2) (Stearoyl-ACP desaturase). (Os04t0379900-01)
indica	TIP_29157	Os04g0379900	OS04T0379900-01	0,041785367	-0,457863385	0,10966194	down	R2	TIP	dry	126	0,238095238	chr04	18562388	MITE/Tourist	chr04	18560190	18564376	-	Similar to Acyl-[acyl-carrier-protein] desaturase, chloroplast precursor (EC 1.14.19.2) (Stearoyl-ACP desaturase). (Os04t0379900-01)
indica	TIP_32483	Os04g0615200	OS04T0615200-01	0,042164459	-0,457202553	0,109364219	down	R2	TIP	dry	126	0,206349206	chr04	31220708	LINE/unknown	chr04	31219893	31220898	-	Hypothetical protein. (Os04t0615200-01)
indica	TIP_34323	Os05g0171200	OS05T0171200-01	0,04223293	0,467399401	0,108768957	up	R2	TIP	dry	126	0,80952381	chr05	4267734	MITE/Stow	chr05	4262642	4263449	+	Embryo-specific 3 family protein. (Os05t0171200-01)
indica	TIP_2336	Os01g0273500	OS01T0273500-01	0,04223293	-0,336011972	0,108643223	down	R2	TIP	dry	126	0,912698413	chr01	9476237	MITE/Stow	chr01	9470130	9475187	+	Heat shock protein DnaJ, N-terminal domain containing protein. (Os01t0273500-01)
indica	TIP_48004	Os07g0212200	OS07T0212200-01	0,04223293	0,480009481	0,108622165	up	R2	TIP	dry	122	0,827868852	chr07	6141632	DNAnona/MULE	chr07	6134016	6136740	+	Similar to MRNA-binding protein (Fragment). (Os07t0212200-01)
indica	TIP_55229	Os08g0366100	OS08T0366100-01	0,04223293	-0,18625821	0,108566112	down	R2	TIP	dry	125	0,496	chr08	16983803	MITE/Stow	chr08	16982279	16985259	+	Similar to Endothelial differentiation-related factor 1 (EDF-1) (Multiprotein bridging factor 1) (MBF1). (Os08t0366100-01)
indica	TIP_63074	Os10g0159800	OS10T0159800-04	0,04223293	0,395543235	0,108498577	up	R2	TIP	dry	126	0,595238095	chr10	3798513	DNAnona/Helitron	chr10	3793940	3803819	-	Alcohol dehydrogenase superfamily, zinc-containing protein. (Os10t0159800-01);Similar to Alcohol dehydrogenase 2. (Os10t0159800-03);Similar to Alcohol dehydrogenase 2. (Os10t0159800-04)
indica	TIP_41202	Os06g0211300	OS06T0211300-01	0,042269128	0,332389807	0,108324281	up	R2	TIP	dry	126	0,531746032	chr06	5689446	DNAnona/Helitron	chr06	5688697	5690594	+	Short-chain dehydrogenase/reductase SDR domain containing protein. (Os06t0211300-01)
indica	TIP_58641	Os09g0256700	OS09T0256700-01	0,044177034	0,45317761	0,107563714	up	R2	TIP	dry	121	0,578512397	chr09	4277788	MITE/Tourist	chr09	4277193	4277778	-	Conserved hypothetical protein. (Os09t0256700-01)
indica	TIP_47231	Os07g0162500	OS07T0162500-02	0,04572817	0,440151676	0,106935719	up	R2	TIP	dry	125	0,864	chr07	3344555	DNAnona/MULE	chr07	3342219	3343596	-	Alpha/beta hydrolase fold-3 domain containing protein. (Os07t0162500-02)
indica	TIP_41203	Os06g0211300	OS06T0211300-01	0,048696432	0,328153844	0,105767876	up	R2	TIP	dry	126	0,523809524	chr06	5690171	MITE/Stow	chr06	5688697	5690594	+	Short-chain dehydrogenase/reductase SDR domain containing protein. (Os06t0211300-01)
indica	TIP_41205	Os06g0211300	OS06T0211300-01	0,048696432	0,328153844	0,105767876	up	R2	TIP	dry	126	0,523809524	chr06	5694954	DNAnona/MULEtir	chr06	5688697	5690594	+	Short-chain dehydrogenase/reductase SDR domain containing protein. (Os06t0211300-01)
indica	TIP_3390	Os01g0352100	OS01T0352100-01	1,67824E-22	-1,804234095	0,605739714	down	R3	TIP	dry	126	0,73015873	chr01	14098954	LINE/unknown	chr01	14101994	14108083	+	2OG-Fe(II) oxygenase domain containing protein. (Os01t0352100-01)
indica	TIP_3391	Os01g0352100	OS01T0352100-01	1,68044E-20	-1,681578339	0,570757466	down	R3	TIP	dry	126	0,69047619	chr01	14102762	DNAnona/Helitron	chr01	14101994	14108083	+	2OG-Fe(II) oxygenase domain containing protein. (Os01t0352100-01)
indica	TIP_70824	Os11g0595200	OS11T0595200-01	3,18581E-19	-1,396482848	0,547093731	down	R3	TIP	dry	126	0,603174603	chr11	22661298	DNAnona/MULE	chr11	22660534	22662341	+	PAP fibrillin family protein. (Os11t0595200-01)
indica	TIP_41765	Os06g0254600	OS06T0254600-01	5,46323E-17	-1,267800677	0,505924379	down	R3	TIP	dry	126	0,46031746	chr06	7995374	MITE/Tourist	chr06	7996917	8004842	-	Caleosin related family protein. (Os06t0254600-01)
indica	TIP_75781	Os12g0628100	OS12T0628100-01	4,15714E-16	-2,575757681	0,487790265	down	R3	TIP	dry	126	0,896825397	chr12	26892919	MITE/Tourist	chr12	26888810	26890166	-	Similar to Actin-depolymerizing factor 6 (ADF-6) (AtADF6). (Os12t0628100-01)
indica	TIP_543	Os01g0152700	OS01T0152700-01	1,19935E-15	1,016280855	0,477514189	up	R3	TIP	dry	126	0,682539683	chr01	2839521	LINE/unknown	chr01	2837892	2838171	-	Similar to Histone H2B (CaH2B). (Os01t0152700-01)
indica	TIP_542	Os01g0152700	OS01T0152700-01	5,32829E-13	-0,985175707	0,422642093	down	R3	TIP	dry	126	0,285714286	chr01	2837603	SINE/unknown	chr01	2837892	2838171	-	Similar to Histone H2B (CaH2B). (Os01t0152700-01)
indica	TIP_61803	Os09g0517000	OS09T0517000-01	4,21598E-11	1,032558407	0,379650027	up	R3	TIP	dry	126	0,841269841	chr09	20157583	MITE/Stow	chr09	20156455	20157191	+	Conserved hypothetical protein. (Os09t0517000-01)
indica	TIP_16897	Os02g0721100	OS02T0721100-01	8,73505E-11	0,66862895	0,371233921	up	R3	TIP	dry	126	0,198412698	chr02	29918000	DNAauto/MULE	chr02	29919262	29920338	-	Similar to E2 ubiquitin-conjugating enzyme UbcH5B (Fragment). (Os02t0721100-01)
indica	TIP_70825	Os11g0595200	OS11T0595200-01	1,12309E-10	-1,12014804	0,367653644	down	R3	TIP	dry	126	0,5	chr11	22662221	MITE/Tourist	chr11	22660534	22662341	+	PAP fibrillin family protein. (Os11t0595200-01)
indica	TIP_72732	Os12g0226400	OS12T0226400-00	1,44297E-10	0,662605638	0,364162506	up	R3	TIP	dry	126	0,365079365	chr12	6886206	DNAnona/POLE	chr12	6889996	6896735	+	Similar to 2-alkenal reductase. (Os12t0226400-00)
indica	TIP_3392	Os01g0352100	OS01T0352100-01	2,09476E-10	-1,256936478	0,359493989	down	R3	TIP	dry	126	0,595238095	chr01	14103644	DNAnona/Helitron	chr01	14101994	14108083	+	2OG-Fe(II) oxygenase domain containing protein. (Os01t0352100-01)
indica	TIP_66361	Os10g0536100	OS10T0536100-01	2,39607E-10	1,656251374	0,357305249	up	R3	TIP	dry	124	0,89516129	chr10	20863697	DNAauto/PILE	chr10	20863187	20873635	+	MIKC-type MADS-box protein, Long day (LD)-specific negative regulator of flowering (Os10t0536100-01)
indica	TIP_72733	Os12g0226400	OS12T0226400-00	4,81261E-10	-0,654782432	0,348656466	down	R3	TIP	dry	126	0,650793651	chr12	6889433	LTR/Gypsy	chr12	6889996	6896735	+	Similar to 2-alkenal reductase. (Os12t0226400-00)
indica	TIP_72734	Os12g0226400	OS12T0226400-00	4,81261E-10	-0,654782432	0,348656466	down	R3	TIP	dry	126	0,650793651	chr12	6890512	LTR/Gypsy	chr12	6889996	6896735	+	Similar to 2-alkenal reductase. (Os12t0226400-00)
indica	TIP_49742	Os07g0475000	OS07T0475000-01	9,96138E-10	-1,083284985	0,340404491	down	R3	TIP	dry	126	0,150793651	chr07	17140585	LTR/Copia	chr07	17136166	17144612	+	Conserved hypothetical protein. (Os07t0475000-01)
indica	TIP_19871	Os03g0219200	OS03T0219200-01	2,10191E-09	-0,75311519	0,331889806	down	R3	TIP	dry	126	0,111111111	chr03	6275388	DNAnona/MULE	chr03	6271895	6275386	-	CuZn superoxide dismutase, Response to salinity, drought, and oxidative stress (Os03t0219200-01)
indica	TIP_47761	Os07g0196200	OS07T0196200-01	3,04432E-09	-1,310324005	0,327337785	down	R3	TIP	dry	126	0,373015873	chr07	5219381	DNAauto/MULE	chr07	5216029	5217014	-	Protein of unknown function DUF3252 domain containing protein. (Os07t0196200-01)
indica	TIP_67485	Os11g0155600	OS11T0155600-01	1,47418E-08	-0,902434975	0,309696558	down	R3	TIP	dry	126	0,246031746	chr11	2606655	MITE/Tourist	chr11	2605752	2614119	-	Conserved hypothetical protein. (Os11t0155600-01)
indica	TIP_53604	Os08g0183900	OS08T0183900-01	3,20574E-08	-0,928567838	0,300574878	down	R3	TIP	dry	126	0,126984127	chr08	4898051	DNAnona/unknown	chr08	4897613	4900341	-	Similar to dihydroflavonol-4-reductase. (Os08t0183900-01)
indica	TIP_39336	Os05g0546300	OS05T0546300-01	5,78954E-08	0,474790245	0,293448758	up	R3	TIP	dry	126	0,293650794	chr05	27121709	MITE/Tourist	chr05	27119121	27120202	+	Hypothetical protein. (Os05t0546300-01)
indica	TIP_39334	Os05g0546300	OS05T0546300-01	1,8339E-07	0,459967421	0,279677407	up	R3	TIP	dry	126	0,301587302	chr05	27119972	DNAauto/MULE	chr05	27119121	27120202	+	Hypothetical protein. (Os05t0546300-01)
indica	TIP_58942	Os09g0287500	OS09T0287500-01	1,8339E-07	-0,762228938	0,279400276	down	R3	TIP	dry	125	0,688	chr09	6437899	DNAnona/Helitron	chr09	6439640	6441905	-	Protein of unknown function DUF565 family protein. (Os09t0287500-01)
indica	TIP_16476	Os02g0687900	OS02T0687900-01	1,8983E-07	-1,26630812	0,278521274	down	R3	TIP	dry	126	0,896825397	chr02	28212452	DNAnona/CACTA	chr02	28212163	28216943	+	Peptidase S10, serine carboxypeptidase family protein. (Os02t0687900-01)
indica	TIP_58769	Os09g0270900	OS09T0270900-02	5,10917E-07	0,485041661	0,266668272	up	R3	TIP	dry	119	0,218487395	chr09	5312050	LTR/Gypsy	chr09	5306896	5309044	-	BolA-like protein domain containing protein. (Os09t0270900-01);Similar to EMB1374. (Os09t0270900-02)
indica	TIP_49904	Os07g0486500	OS07T0486500-02	1,00042E-06	-0,508462243	0,258386317	down	R3	TIP	dry	126	0,484126984	chr07	17912109	MITE/Tourist	chr07	17907341	17912298	+	RhoGAP domain containing protein. (Os07t0486500-01);RhoGAP domain containing protein. (Os07t0486500-02)
indica	TIP_40623	Os06g0159900	OS06T0159900-01	1,08259E-06	0,443495537	0,257019363	up	R3	TIP	dry	126	0,238095238	chr06	3059828	MITE/Stow	chr06	3051248	3055005	+	Similar to Arm repeat containing protein. (Os06t0159900-01)
indica	TIP_9857	Os01g0965900	OS01T0965900-01	1,25197E-06	-0,658456645	0,254484263	down	R3	TIP	dry	126	0,785714286	chr01	42592996	LINE/unknown	chr01	42587307	42590270	-	Conserved hypothetical protein. (Os01t0965900-01)
indica	TIP_40867	Os06g0185900	OS06T0185900-01	1,25197E-06	-1,114032699	0,254473048	down	R3	TIP	dry	126	0,063492063	chr06	4322394	DNAnona/Helitron	chr06	4321654	4325071	+	Similar to Glutathione peroxidase. (Os06t0185900-01)
indica	TIP_40866	Os06g0185900	OS06T0185900-01	1,45303E-06	-1,111867453	0,252319703	down	R3	TIP	dry	118	0,06779661	chr06	4320286	MITE/Tourist	chr06	4321654	4325071	+	Similar to Glutathione peroxidase. (Os06t0185900-01)
indica	TIP_60553	Os09g0428900	OS09T0428900-01	1,71744E-06	0,871268764	0,249957864	up	R3	TIP	dry	112	0,071428571	chr09	15587803	LINE/unknown	chr09	15583194	15586475	+	Similar to Conserved protein. (Os09t0428900-01)
indica	TIP_38559	Os05g0488000	OS05T0488000-01	1,85087E-06	-0,491363382	0,248696442	down	R3	TIP	dry	126	0,761904762	chr05	23996139	DNAnona/MULE	chr05	23996148	23997293	+	Peptidase C1A, papain family protein. (Os05t0488000-01)
indica	TIP_34317	Os05g0170950	OS05T0170950-00	2,36766E-06	-0,540030091	0,245408414	down	R3	TIP	dry	126	0,531746032	chr05	4252043	DNAnona/Helitron	chr05	4254052	4254939	+	Similar to Plastid phosphoenolpyruvate/phosphate translocator. (Os05t0170950-00)
indica	TIP_24692	Os03g0673600	OS03T0673600-01	2,72412E-06	-1,204318253	0,243382996	down	R3	TIP	dry	126	0,682539683	chr03	26616395	MITE/Tourist	chr03	26617086	26618211	-	Conserved hypothetical protein. (Os03t0673600-01)
indica	TIP_66265	Os10g0528150	OS10T0528150-01	3,02664E-06	-0,603885865	0,241780373	down	R3	TIP	dry	126	0,912698413	chr10	20554824	DNAnona/hAT	chr10	20553611	20554584	-	Hypothetical protein. (Os10t0528150-01)
indica	TIP_60554	Os09g0428900	OS09T0428900-01	3,34088E-06	0,512522606	0,240262542	up	R3	TIP	dry	126	0,206349206	chr09	15589044	MITE/Stow	chr09	15583194	15586475	+	Similar to Conserved protein. (Os09t0428900-01)
indica	TIP_20554	Os03g0269900	OS03T0269900-01	3,49249E-06	0,624542154	0,239403131	up	R3	TIP	dry	126	0,642857143	chr03	9020009	DNAnona/unknown	chr03	9011629	9016463	+	Protein of unknown function DUF604 family protein. (Os03t0269900-01)
indica	TIP_36305	Os05g0320800	OS05T0320800-01	3,91342E-06	-0,373171085	0,237718814	down	R3	TIP	dry	126	0,841269841	chr05	14903317	MITE/Tourist	chr05	14906587	14907252	+	Hypothetical protein. (Os05t0320800-01)
indica	TIP_26201	Os03g0774600	OS03T0774600-01	4,93823E-06	1,076281759	0,23460948	up	R3	TIP	dry	126	0,920634921	chr03	32108992	DNAnona/MULE	chr03	32113298	32113796	+	Conserved hypothetical protein. (Os03t0774600-01)
indica	TIP_48084	Os07g0223766	OS07T0223766-01	1,10387E-05	0,380257899	0,224554858	up	R3	TIP	dry	121	0,074380165	chr07	6849611	MITE/Tourist	chr07	6849842	6851728	-	Hypothetical conserved gene. (Os07t0223766-01)
indica	TIP_43197	Os06g0484500	OS06T0484500-01	1,17632E-05	0,549484966	0,223478432	up	R3	TIP	dry	126	0,476190476	chr06	16500457	DNAnona/MULE	chr06	16504514	16505330	+	Conserved hypothetical protein. (Os06t0484500-01)
indica	TIP_52081	Os07g0664000	OS07T0664000-00	1,45761E-05	-0,872116285	0,220562827	down	R3	TIP	dry	126	0,920634921	chr07	28016916	MITE/Stow	chr07	28020795	28021694	+	Similar to Oxidoreductase, short chain dehydrogenase/reductase family protein, expressed. (Os07t0664000-00)
indica	TIP_43198	Os06g0484500	OS06T0484500-01	1,80318E-05	-0,541743715	0,217664812	down	R3	TIP	dry	126	0,492063492	chr06	16501645	MITE/Tourist	chr06	16504514	16505330	+	Conserved hypothetical protein. (Os06t0484500-01)
indica	TIP_38610	Os05g0492500	OS05T0492500-01	1,85997E-05	0,599030203	0,21679921	up	R3	TIP	dry	112	0,285714286	chr05	24196744	DNAnona/Helitron	chr05	24194658	24202634	-	Hypothetical protein. (Os05t0492500-01)
indica	TIP_11492	Os02g0212500	OS02T0212500-01	1,85997E-05	0,674098449	0,216724817	up	R3	TIP	dry	116	0,784482759	chr02	6272296	LINE/unknown	chr02	6270314	6271547	+	Conserved hypothetical protein. (Os02t0212500-01)
indica	TIP_9856	Os01g0965900	OS01T0965900-01	2,23285E-05	-0,588877538	0,21420387	down	R3	TIP	dry	126	0,76984127	chr01	42586676	MITE/Stow	chr01	42587307	42590270	-	Conserved hypothetical protein. (Os01t0965900-01)
indica	TIP_24695	Os03g0673600	OS03T0673600-01	2,83411E-05	1,179432968	0,210992037	up	R3	TIP	dry	124	0,274193548	chr03	26618960	DNAnona/hAT	chr03	26617086	26618211	-	Conserved hypothetical protein. (Os03t0673600-01)
indica	TIP_162	Os01g0115700	OS01T0115700-00	2,8479E-05	-0,45494459	0,210671328	down	R3	TIP	dry	122	0,401639344	chr01	853367	LINE/unknown	chr01	851835	854599	-	Receptor-like kinase 19 (Os01t0115700-01)
indica	TIP_544	Os01g0152900	OS01T0152900-00	3,08472E-05	-0,554852193	0,20942613	down	R3	TIP	dry	126	0,301587302	chr01	2844146	MITE/Tourist	chr01	2844503	2845212	-	Similar to Histone H2B.1. (Os01t0152900-00)
indica	TIP_26835	Os03g0826000	OS03T0826000-01	3,40384E-05	0,494536182	0,207953832	up	R3	TIP	dry	126	0,142857143	chr03	34705110	MITE/Tourist	chr03	34700840	34705414	-	Conserved hypothetical protein. (Os03t0826000-01)
indica	TIP_32894	Os04g0653000	OS04T0653000-01	6,78E-05	0,723465493	0,199107699	up	R3	TIP	dry	126	0,166666667	chr04	33310571	MITE/Tourist	chr04	33306468	33310169	+	Jasmonic acid (JA) signalling repressor, Regulation of spikelet development (Os04t0653000-01)
indica	TIP_41619	Os06g0241100	OS06T0241100-01	8,14078E-05	0,391438207	0,196567242	up	R3	TIP	dry	119	0,277310924	chr06	7329511	DNAnona/MULE	chr06	7325616	7327449	-	Membrane-associated kinase-5, Response to drought stress in tolerant genotype, Response to submergence (Os06t0241100-01)
indica	TIP_24695	Os03g0673700	OS03T0673700-01	8,45472E-05	0,674692216	0,19585172	up	R3	TIP	dry	124	0,274193548	chr03	26618960	DNAnona/hAT	chr03	26622941	26623429	+	Similar to predicted protein. (Os03t0673700-01)
indica	TIP_23286	Os03g0575700	OS03T0575700-01	8,78218E-05	0,383880091	0,195138099	up	R3	TIP	dry	126	0,055555556	chr03	21041342	MITE/Stow	chr03	21037379	21038297	-	Conserved hypothetical protein. (Os03t0575700-01)
indica	TIP_56350	Os08g0452900	OS08T0452900-01	9,83816E-05	-1,208570816	0,193475783	down	R3	TIP	dry	126	0,071428571	chr08	22160973	LINE/unknown	chr08	22159610	22161424	+	Similar to Chaperone protein dnaJ. (Os08t0452900-01)
indica	TIP_32892	Os04g0653000	OS04T0653000-01	0,000103751	0,711503247	0,192577783	up	R3	TIP	dry	126	0,166666667	chr04	33303873	MITE/Tourist	chr04	33306468	33310169	+	Jasmonic acid (JA) signalling repressor, Regulation of spikelet development (Os04t0653000-01)
indica	TIP_32891	Os04g0653000	OS04T0653000-01	0,000109044	0,696931519	0,191725575	up	R3	TIP	dry	126	0,174603175	chr04	33303047	MITE/Tourist	chr04	33306468	33310169	+	Jasmonic acid (JA) signalling repressor, Regulation of spikelet development (Os04t0653000-01)
indica	TIP_52367	Os07g0684000	OS07T0684000-01	0,000113204	1,709308906	0,191032416	up	R3	TIP	dry	126	0,968253968	chr07	29010390	DNAnona/MULE	chr07	29008876	29009943	+	S-type euonymus-related lectin (EUL), Response to salt and drought stress, ABA treatment, Response to biotic treatment (Os07t0684000-01)
indica	TIP_46611	Os07g0109700	OS07T0109700-01	0,000118357	-0,866791128	0,190252892	down	R3	TIP	dry	126	0,126984127	chr07	537085	LTR/Gypsy	chr07	536836	537792	-	Conserved hypothetical protein. (Os07t0109700-01)
indica	TIP_2107	Os01g0256500	OS01T0256500-02	0,000129961	1,580264193	0,18885535	up	R3	TIP	dry	110	0,909090909	chr01	8542846	MITE/Stow	chr01	8546065	8546869	-	Similar to ZnI. (Os01t0256500-02)
indica	TIP_3413	Os01g0355800	OS01T0355800-00	0,000131426	0,445990676	0,188503648	up	R3	TIP	dry	124	0,080645161	chr01	14322251	MITE/Stow	chr01	14326183	14327100	+	Similar to Esterase PIR7A. (Os01t0355800-00)
indica	TIP_68142	Os11g0216100	OS11T0216100-01	0,000146419	-0,472701431	0,186926299	down	R3	TIP	dry	126	0,706349206	chr11	6066143	SINE/unknown	chr11	6065311	6066797	-	Similar to Heat shock protein binding protein. (Os11t0216100-01)
indica	TIP_41603	Os06g0239200	OS06T0239200-00	0,000154717	0,596205423	0,186022526	up	R3	TIP	dry	126	0,444444444	chr06	7230724	DNAnona/MULE	chr06	7230221	7230662	+	Conserved hypothetical protein. (Os06t0239200-00)
indica	TIP_46627	Os07g0110800	OS07T0110800-01	0,000195161	0,765155062	0,182864863	up	R3	TIP	dry	108	0,638888889	chr07	606924	MITE/Tourist	chr07	604586	607425	-	Conserved hypothetical protein. (Os07t0110800-01)
indica	TIP_70449	Os11g0539600	OS11T0539600-00	0,000199874	0,395638782	0,18236266	up	R3	TIP	dry	123	0,170731707	chr11	19696468	DNAnona/hAT	chr11	19701215	19702758	-	Conserved hypothetical protein. (Os11t0539600-00)
indica	TIP_64322	Os10g0378100	OS10T0378100-01	0,000215339	-0,739902393	0,181216174	down	R3	TIP	dry	126	0,214285714	chr10	12094053	DNAauto/CACTA	chr10	12090264	12098560	-	Similar to Cytochrome P450 family protein, expressed. (Os10t0378100-01)
indica	TIP_27404	Os04g0121100	OS04T0121100-01	0,000226816	0,920989702	0,180360267	up	R3	TIP	dry	126	0,119047619	chr04	1249238	MITE/Tourist	chr04	1248450	1260282	+	Similar to OSIGBa0115D20.4 protein. (Os04t0121100-01)
indica	TIP_27791	Os04g0188433	OS04T0188433-01	0,000277632	-0,879082619	0,177582038	down	R3	TIP	dry	126	0,753968254	chr04	5928415	MITE/Stow	chr04	5931193	5931871	-	Similar to OSIGBa0102N07.2 protein. (Os04t0188433-01)
indica	TIP_17940	Os02g0805800	OS02T0805800-02	0,000308556	-0,316202344	0,176039508	down	R3	TIP	dry	126	0,912698413	chr02	34374512	MITE/Stow	chr02	34372417	34378347	-	Aminoglycoside phosphotransferase domain containing protein. (Os02t0805800-01);Similar to cDNA clone:J013094E21, full insert sequence. (Os02t0805800-02)
indica	TIP_67482	Os11g0155600	OS11T0155600-01	0,000315838	-0,770848448	0,175555026	down	R3	TIP	dry	126	0,174603175	chr11	2603743	LINE/unknown	chr11	2605752	2614119	-	Conserved hypothetical protein. (Os11t0155600-01)
indica	TIP_169	Os01g0116900	OS01T0116900-00	0,000369066	0,567890693	0,173280771	up	R3	TIP	dry	123	0,146341463	chr01	937226	MITE/Tourist	chr01	924451	956639	+	Protein kinase, catalytic domain domain containing protein. (Os01t0116900-00)
indica	TIP_543	Os01g0152900	OS01T0152900-00	0,000369066	0,497480671	0,173189218	up	R3	TIP	dry	126	0,682539683	chr01	2839521	LINE/unknown	chr01	2844503	2845212	-	Similar to Histone H2B.1. (Os01t0152900-00)
indica	TIP_11952	Os02g0251900	OS02T0251900-01	0,000426235	-0,306634497	0,171028482	down	R3	TIP	dry	126	0,936507937	chr02	8537931	DNAnona/unknown	chr02	8541338	8542125	-	Similar to Tobacco rattle virus-induced protein variant 2. (Os02t0251900-01)
indica	TIP_10156	Os02g0117500	OS02T0117500-01	0,000426235	-0,72503222	0,170979243	down	R3	TIP	dry	126	0,968253968	chr02	917059	MITE/Stow	chr02	918797	923968	+	Glutamate receptor like protein, Mediation of ion uptake (Os02t0117500-01)
indica	TIP_58637	Os09g0256100	OS09T0256100-00	0,000518649	0,312598777	0,16826971	up	R3	TIP	dry	125	0,52	chr09	4250407	LTR/TRIM	chr09	4250749	4251832	+	Similar to flavonol 4-sulfotransferase. (Os09t0256100-00)
indica	TIP_67873	Os11g0184900	OS11T0184900-02	0,000530184	-0,559305289	0,167813574	down	R3	TIP	dry	126	0,555555556	chr11	4305229	DNAnona/MULE	chr11	4299277	4301784	-	Similar to OsNAC5 protein [imported]-rice. (Os11t0184900-01);NAC-type transcription factor, Regulation of stress-inducible genes, Stress tolerance (Os11t0184900-02)
indica	TIP_46491	Os07g0100800	OS07T0100800-01	0,000598361	0,48753819	0,166076793	up	R3	TIP	dry	126	0,452380952	chr07	54241	DNAauto/MULE	chr07	48787	53212	-	Proline (Pro) and &gamma;-aminobutyric acid (GABA) transporter, Stress tolerance, Cadmium stress tolerance (Os07t0100800-01)
indica	TIP_38702	Os05g0500000	OS05T0500000-00	0,000636786	-0,145455659	0,165101905	down	R3	TIP	dry	126	0,912698413	chr05	24611125	MITE/Tourist	chr05	24611755	24613221	+	UDP-glucuronosyl/UDP-glucosyltransferase family protein. (Os05t0500000-00)
indica	TIP_1416	Os01g0214400	OS01T0214400-01	0,000643172	-0,543682491	0,164806999	down	R3	TIP	dry	126	0,285714286	chr01	6253685	MITE/Stow	chr01	6253793	6256906	+	Similar to predicted protein. (Os01t0214400-01)
indica	TIP_63074	Os10g0159800	OS10T0159800-04	0,000678221	0,554070078	0,163954426	up	R3	TIP	dry	126	0,595238095	chr10	3798513	DNAnona/Helitron	chr10	3793940	3803819	-	Alcohol dehydrogenase superfamily, zinc-containing protein. (Os10t0159800-01);Similar to Alcohol dehydrogenase 2. (Os10t0159800-03);Similar to Alcohol dehydrogenase 2. (Os10t0159800-04)
indica	TIP_24698	Os03g0673600	OS03T0673600-01	0,000746625	1,10381879	0,16241045	up	R3	TIP	dry	115	0,252173913	chr03	26622142	DNAnona/CACTA	chr03	26617086	26618211	-	Conserved hypothetical protein. (Os03t0673600-01)
indica	TIP_41602	Os06g0239200	OS06T0239200-00	0,000746625	-0,569818926	0,162383829	down	R3	TIP	dry	119	0,512605042	chr06	7227395	DNAnona/MULEtir	chr06	7230221	7230662	+	Conserved hypothetical protein. (Os06t0239200-00)
indica	TIP_46951	Os07g0140633	OS07T0140633-00	0,000936418	0,282529548	0,159274102	up	R3	TIP	dry	126	0,587301587	chr07	2116361	LINE/unknown	chr07	2117854	2118368	-	Hypothetical gene. (Os07t0140633-00)
indica	TIP_40362	Os06g0136300	OS06T0136300-01	0,001176226	0,845951504	0,156137572	up	R3	TIP	dry	121	0,082644628	chr06	1923164	MITE/Tourist	chr06	1922429	1923593	+	Similar to OSIGBa0142C11.2 protein. (Os06t0136300-01)
indica	TIP_98	Os01g0108400	OS01T0108400-00	0,001289954	-0,437694745	0,154773794	down	R3	TIP	dry	126	0,587301587	chr01	457422	MITE/Stow	chr01	455707	457425	+	Helix-loop-helix DNA-binding domain containing protein. (Os01t0108400-00)
indica	TIP_58639	Os09g0256100	OS09T0256100-00	0,001326882	-0,298807654	0,154250508	down	R3	TIP	dry	126	0,46031746	chr09	4253519	MITE/Stow	chr09	4250749	4251832	+	Similar to flavonol 4-sulfotransferase. (Os09t0256100-00)
indica	TIP_67604	Os11g0162700	OS11T0162700-02	0,001371126	0,21284628	0,153668726	up	R3	TIP	dry	125	0,272	chr11	3058100	DNAnona/Helitron	chr11	3058267	3062680	-	Hypothetical conserved gene. (Os11t0162700-01);Hypothetical conserved gene. (Os11t0162700-02)
indica	TIP_41203	Os06g0211300	OS06T0211300-01	0,001453475	0,522662746	0,152604954	up	R3	TIP	dry	126	0,523809524	chr06	5690171	MITE/Stow	chr06	5688697	5690594	+	Short-chain dehydrogenase/reductase SDR domain containing protein. (Os06t0211300-01)
indica	TIP_41205	Os06g0211300	OS06T0211300-01	0,001453475	0,522662746	0,152604954	up	R3	TIP	dry	126	0,523809524	chr06	5694954	DNAnona/MULEtir	chr06	5688697	5690594	+	Short-chain dehydrogenase/reductase SDR domain containing protein. (Os06t0211300-01)
indica	TIP_67483	Os11g0155600	OS11T0155600-01	0,001479733	-0,761486028	0,152223078	down	R3	TIP	dry	126	0,150793651	chr11	2604522	MITE/Tourist	chr11	2605752	2614119	-	Conserved hypothetical protein. (Os11t0155600-01)
indica	TIP_18727	Os03g0134300	OS03T0134300-01	0,001494978	-0,379745195	0,151943275	down	R3	TIP	dry	126	0,214285714	chr03	1913658	LTR/Copia	chr03	1909201	1919394	+	Similar to ATP phosphoribosyl transferase. (Os03t0134300-01)
indica	TIP_3601	Os01g0372400	OS01T0372400-01	0,001512293	-0,297520242	0,151558063	down	R3	TIP	dry	122	0,696721311	chr01	15340346	DNAnona/Helitron	chr01	15344380	15345409	+	Glutathione S-transferase, C-terminal-like domain containing protein. (Os01t0372400-01)
indica	TIP_18780	Os03g0138900	OS03T0138900-01	0,001512293	-0,486843866	0,151506263	down	R3	TIP	dry	126	0,317460317	chr03	2139968	DNAauto/MULE	chr03	2139916	2141093	+	Conserved hypothetical protein. (Os03t0138900-01)
indica	TIP_61815	Os09g0518200	OS09T0518200-01	0,001748091	-0,535188679	0,149459372	down	R3	TIP	dry	126	0,928571429	chr09	20218770	DNAauto/MULE	chr09	20222176	20223992	+	UDP:glucose salicylic acid glucosyltransferase, Chemically-induced disease resistance (Os09t0518200-01)
indica	TIP_41202	Os06g0211300	OS06T0211300-01	0,001808314	0,516690762	0,1488739	up	R3	TIP	dry	126	0,531746032	chr06	5689446	DNAnona/Helitron	chr06	5688697	5690594	+	Short-chain dehydrogenase/reductase SDR domain containing protein. (Os06t0211300-01)
indica	TIP_33760	Os05g0122800	OS05T0122800-01	0,002256192	-0,387476997	0,145816648	down	R3	TIP	dry	125	0,856	chr05	1252801	MITE/Stow	chr05	1254602	1258729	+	Tetraspanin domain containing protein. (Os05t0122800-01);Similar to senescence-associated protein. (Os05t0122800-02);Tetraspanin domain containing protein. (Os05t0122800-03)
indica	TIP_29027	Os04g0364800	OS04T0364800-00	0,002361407	0,405318788	0,145077464	up	R3	TIP	dry	112	0,5625	chr04	17560371	MITE/Stow	chr04	17560683	17561234	+	Barwin-related endoglucanase domain containing protein. (Os04t0364800-00)
indica	TIP_583	Os01g0158900	OS01T0158900-01	0,002415369	-0,331021912	0,144643172	down	R3	TIP	dry	126	0,904761905	chr01	3084889	SINE/unknown	chr01	3085452	3090887	-	Zinc finger, NF-X1-type domain containing protein. (Os01t0158900-01);Hypothetical conserved gene. (Os01t0158900-02)
indica	TIP_67392	Os11g0150800	OS11T0150800-01	0,002459187	0,362813228	0,144271143	up	R3	TIP	dry	124	0,072580645	chr11	2363757	DNAnona/MULEtir	chr11	2363882	2364482	+	Hypothetical protein. (Os11t0150800-01)
indica	TIP_28709	Os04g0338100	OS04T0338100-01	0,002471912	-0,494751592	0,144069927	down	R3	TIP	dry	126	0,436507937	chr04	15927749	LTR/Copia	chr04	15924375	15928109	+	Similar to IN2-2 protein. (Os04t0338100-01)
indica	TIP_26834	Os03g0826000	OS03T0826000-01	0,002473584	0,458104313	0,143929343	up	R3	TIP	dry	126	0,111111111	chr03	34696279	DNAnona/hAT	chr03	34700840	34705414	-	Conserved hypothetical protein. (Os03t0826000-01)
indica	TIP_14976	Os02g0574100	OS02T0574100-01	0,002476742	-0,26245172	0,143782099	down	R3	TIP	dry	124	0,927419355	chr02	22014565	MITE/Stow	chr02	22013289	22017622	+	Sugar/inositol transporter domain containing protein. (Os02t0574100-01)
indica	TIP_55229	Os08g0366100	OS08T0366100-01	0,002500876	-0,268468971	0,14352466	down	R3	TIP	dry	125	0,496	chr08	16983803	MITE/Stow	chr08	16982279	16985259	+	Similar to Endothelial differentiation-related factor 1 (EDF-1) (Multiprotein bridging factor 1) (MBF1). (Os08t0366100-01)
indica	TIP_1959	Os01g0246400	OS01T0246400-01	0,002776558	-0,843514103	0,142011798	down	R3	TIP	dry	126	0,182539683	chr01	8063852	MITE/Tourist	chr01	8061858	8062892	+	Similar to Low molecular mass early light-inducible protein HV90, chloroplast precursor (ELIP). (Os01t0246400-01)
indica	TIP_58785	Os09g0272000	OS09T0272000-01	0,002795479	0,688631925	0,141794961	up	R3	TIP	dry	116	0,310344828	chr09	5397336	MITE/Stow	chr09	5395272	5396709	-	Heavy metal transport/detoxification protein domain containing protein. (Os09t0272000-01)
indica	TIP_52084	Os07g0664000	OS07T0664000-00	0,002886656	-0,506600165	0,141243788	down	R3	TIP	dry	125	0,832	chr07	28022646	MITE/Stow	chr07	28020795	28021694	+	Similar to Oxidoreductase, short chain dehydrogenase/reductase family protein, expressed. (Os07t0664000-00)
indica	TIP_40181	Os06g0124900	OS06T0124900-01	0,003224102	-0,678508049	0,139652167	down	R3	TIP	dry	126	0,904761905	chr06	1343058	DNAnona/hAT	chr06	1341610	1344490	+	Conserved hypothetical protein. (Os06t0124900-01)
indica	TIP_40552	Os06g0154400	OS06T0154400-01	0,003233298	0,69156951	0,13949082	up	R3	TIP	dry	121	0,066115702	chr06	2802746	DNAnona/unknown	chr06	2803042	2806247	+	Domain of unknown function DUF676, lipase-like domain containing protein. (Os06t0154400-01)
indica	TIP_44232	Os06g0564500	OS06T0564500-01	0,003833216	-0,733437668	0,137105792	down	R3	TIP	dry	123	0,918699187	chr06	21705452	DNAnona/Tourist	chr06	21700599	21703282	-	Cysteine synthase (EC 4.2.99.8). (Os06t0564500-01)
indica	TIP_64207	Os10g0370700	OS10T0370700-01	0,003995731	0,880723014	0,136322494	up	R3	TIP	dry	126	0,928571429	chr10	11692333	MITE/Stow	chr10	11691235	11695039	-	Similar to Nitrate transporter (Fragment). (Os10t0370700-01)
indica	TIP_32057	Os04g0585700	OS04T0585700-01	0,003995731	-0,566275604	0,136311098	down	R3	TIP	dry	126	0,206349206	chr04	29594995	LTR/Copia	chr04	29588252	29590515	-	Protein of unknown function DUF581 family protein. (Os04t0585700-01)
indica	TIP_59918	Os09g0382500	OS09T0382500-01	0,004321647	0,510292695	0,135147129	up	R3	TIP	dry	125	0,176	chr09	12983244	DNAnona/MULE	chr09	12977799	12980466	-	Conserved hypothetical protein. (Os09t0382500-01)
indica	TIP_38943	Os05g0513100	OS05T0513100-01	0,004364709	0,487131872	0,13485918	up	R3	TIP	dry	125	0,672	chr05	25442282	MITE/Stow	chr05	25436359	25438597	+	Similar to PlCYC4 protein (Fragment). (Os05t0513100-01)
indica	TIP_62380	Os09g0560800	OS09T0560800-01	0,004364709	-0,41177564	0,134779051	down	R3	TIP	dry	126	0,76984127	chr09	22284693	MITE/Stow	chr09	22281491	22284167	+	Molybdenum cofactor sulfurase, C-terminal domain containing protein. (Os09t0560800-01)
indica	TIP_57681	Os08g0545700	OS08T0545700-01	0,004644568	-0,761329831	0,133791945	down	R3	TIP	dry	126	0,055555556	chr08	27333735	MITE/Stow	chr08	27329441	27331356	+	Similar to TraB protein-related. (Os08t0545700-01)
indica	TIP_32930	Os04g0655300	OS04T0655300-01	0,004644568	-0,527884274	0,133718262	down	R3	TIP	dry	125	0,712	chr04	33418334	LINE/unknown	chr04	33418637	33421199	+	Response to drought in tolerant rice genotype Nagina 22, Response to submergence in japonica cultivar Taikeng 9, Response to Xanthomonas oryzae pv. oryzae in resistant rice genotype IRBB21 (Os04t0655300-01)
indica	TIP_41204	Os06g0211300	OS06T0211300-01	0,004900134	0,506497903	0,132888786	up	R3	TIP	dry	119	0,571428571	chr06	5691350	DNAauto/POLE	chr06	5688697	5690594	+	Short-chain dehydrogenase/reductase SDR domain containing protein. (Os06t0211300-01)
indica	TIP_66603	Os10g0552700	OS10T0552700-01	0,005101823	-0,371926761	0,132236468	down	R3	TIP	dry	112	0,901785714	chr10	21696844	MITE/Stow	chr10	21693876	21694502	-	Similar to Tumor-related protein (Fragment). (Os10t0552700-01)
indica	TIP_40855	Os06g0184800	OS06T0184800-01	0,005542489	-0,497072638	0,131016503	down	R3	TIP	dry	126	0,785714286	chr06	4260021	MITE/Stow	chr06	4264424	4265115	-	Similar to Low-temperature induced protein lt101.1 (Blt101) (Blt101.1). (Os06t0184800-01)
indica	TIP_35339	Os05g0239350	OS05T0239350-01	0,005761485	-0,20021999	0,130386321	down	R3	TIP	dry	126	0,880952381	chr05	8488786	DNAnona/hAT	chr05	8485045	8485825	-	Hypothetical gene. (Os05t0239350-01)
indica	TIP_1586	Os01g0224166	OS01T0224166-00	0,006011749	0,561431734	0,129706319	up	R3	TIP	dry	126	0,111111111	chr01	6825901	DNAnona/MULE	chr01	6828512	6829334	+	Hypothetical gene. (Os01t0224166-00)
indica	TIP_47232	Os07g0162500	OS07T0162500-02	0,006138324	-0,620789142	0,129317227	down	R3	TIP	dry	126	0,095238095	chr07	3347485	MITE/Tourist	chr07	3342219	3343596	-	Alpha/beta hydrolase fold-3 domain containing protein. (Os07t0162500-02)
indica	TIP_15111	Os02g0584800	OS02T0584800-01	0,007145041	-0,761250571	0,127083601	down	R3	TIP	dry	123	0,12195122	chr02	22558673	MITE/Stow	chr02	22553380	22554242	-	Heavy metal transport/detoxification protein domain containing protein. (Os02t0584800-01)
indica	TIP_55228	Os08g0366100	OS08T0366100-01	0,007145041	0,263014834	0,12706436	up	R3	TIP	dry	119	0,411764706	chr08	16981930	MITE/Tourist	chr08	16982279	16985259	+	Similar to Endothelial differentiation-related factor 1 (EDF-1) (Multiprotein bridging factor 1) (MBF1). (Os08t0366100-01)
indica	TIP_58641	Os09g0256700	OS09T0256700-01	0,00763442	0,463850312	0,126067799	up	R3	TIP	dry	121	0,578512397	chr09	4277788	MITE/Tourist	chr09	4277193	4277778	-	Conserved hypothetical protein. (Os09t0256700-01)
indica	TIP_51880	Os07g0643400	OS07T0643400-01	0,007766283	-0,466371822	0,125710414	down	R3	TIP	dry	126	0,888888889	chr07	26786932	LTR/unknown	chr07	26790870	26792040	-	Alpha/beta hydrolase fold-3 domain containing protein. (Os07t0643400-01)
indica	TIP_34204	Os05g0161500	OS05T0161500-01	0,007766283	-0,497905165	0,125558685	down	R3	TIP	dry	126	0,349206349	chr05	3628628	DNAnona/hAT	chr05	3626394	3629080	+	Calcium-activated (p)ppGpp synthetase, Ca<sup>2+</sup>-activated RelA-SpoT homolog 2 (Os05t0161500-01)
indica	TIP_32055	Os04g0585700	OS04T0585700-01	0,007766283	-0,551409083	0,125519551	down	R3	TIP	dry	126	0,198412698	chr04	29592939	MITE/Tourist	chr04	29588252	29590515	-	Protein of unknown function DUF581 family protein. (Os04t0585700-01)
indica	TIP_15311	Os02g0600200	OS02T0600200-01	0,008375088	-0,449524062	0,124401296	down	R3	TIP	dry	126	0,174603175	chr02	23466166	MITE/Tourist	chr02	23465969	23468038	-	IQ calmodulin-binding region domain containing protein. (Os02t0600200-01);Similar to predicted protein. (Os02t0600200-02)
indica	TIP_70450	Os11g0539600	OS11T0539600-00	0,008390218	-0,259431314	0,124273269	down	R3	TIP	dry	115	0,6	chr11	19703784	MITE/Tourist	chr11	19701215	19702758	-	Conserved hypothetical protein. (Os11t0539600-00)
indica	TIP_38550	Os05g0487300	OS05T0487300-02	0,008887173	-0,466281651	0,123396699	down	R3	TIP	dry	126	0,952380952	chr05	23977726	DNAnona/hAT	chr05	23978577	23979669	+	Conserved hypothetical protein. (Os05t0487300-01);Conserved hypothetical protein. (Os05t0487300-02)
indica	TIP_27406	Os04g0121100	OS04T0121100-01	0,008980264	0,688727682	0,123154288	up	R3	TIP	dry	126	0,150793651	chr04	1257157	MITE/Tourist	chr04	1248450	1260282	+	Similar to OSIGBa0115D20.4 protein. (Os04t0121100-01)
indica	TIP_61206	Os09g0470500	OS09T0470500-01	0,009314445	-0,534685762	0,12248775	down	R3	TIP	dry	126	0,23015873	chr09	17909769	MITE/Tourist	chr09	17903166	17904869	+	Homeodomain-leucine zipper (HD-Zip) protein, Regulation of gibberellin signaling (Os09t0470500-01)
indica	TIP_38149	Os05g0455400	OS05T0455400-01	0,009314445	-0,377649774	0,122460437	down	R3	TIP	dry	126	0,261904762	chr05	22370938	DNAauto/MULE	chr05	22371205	22373569	+	Similar to DNA binding protein. (Os05t0455400-01);Basic helix-loop-helix (bHLH) protein, Maintenance of Fe homeostasis (Os05t0455400-02)
indica	TIP_697	Os01g0170900	OS01T0170900-01	0,009568085	-0,485474418	0,121998779	down	R3	TIP	dry	126	0,634920635	chr01	3665958	SINE/unknown	chr01	3665042	3666044	-	Conserved hypothetical protein. (Os01t0170900-01)
indica	TIP_68017	Os11g0202300	OS11T0202300-02	0,009677205	-0,589617277	0,121746763	down	R3	TIP	dry	125	0,152	chr11	5166547	LTR/Gypsy	chr11	5168780	5172092	-	Cyclin-like F-box domain containing protein. (Os11t0202300-01);Similar to F-box domain containing protein, expressed. (Os11t0202300-02)
indica	TIP_60	Os01g0105900	OS01T0105900-01	0,009858393	-0,542770929	0,121316501	down	R3	TIP	dry	126	0,166666667	chr01	305239	DNAauto/MLE	chr01	309520	313170	-	PfkB carbohydrate kinase protein, Regulation of plant height and leaf structure (Os01t0105900-01)
indica	TIP_48004	Os07g0212200	OS07T0212200-01	0,009858393	0,463372679	0,121300394	up	R3	TIP	dry	122	0,827868852	chr07	6141632	DNAnona/MULE	chr07	6134016	6136740	+	Similar to MRNA-binding protein (Fragment). (Os07t0212200-01)
indica	TIP_53491	Os08g0174100	OS08T0174100-00	0,010514974	0,407513599	0,120254123	up	R3	TIP	dry	125	0,104	chr08	4313658	MITE/Stow	chr08	4316104	4318545	-	Similar to transferase family protein. (Os08t0174100-00)
indica	TIP_60938	Os09g0451400	OS09T0451400-01	0,010514974	-0,369162943	0,120237851	down	R3	TIP	dry	126	0,531746032	chr09	16925727	DNAnona/Helitron	chr09	16925457	16927046	+	ACC oxidase, Ethylene biosynthesis (Os09t0451400-01)
indica	TIP_30609	Os04g0477900	OS04T0477900-01	0,010778872	0,290007619	0,11980068	up	R3	TIP	dry	110	0,563636364	chr04	23912608	DNAnona/MULEtir	chr04	23912885	23915134	+	Similar to Cysteine proteinase EP-B 1 precursor (EC 3.4.22.-). (Os04t0477900-01)
indica	TIP_33852	Os05g0128400	OS05T0128400-01	0,010778872	-0,478134754	0,119712494	down	R3	TIP	dry	126	0,182539683	chr05	1681915	MITE/Stow	chr05	1675495	1679054	-	Cation diffusion facilitator (CDF) family protein, Bivalent cation transporter, Translocation of Zn, Cd and other heavy metals, Ion homeostasis (Os05t0128400-01)
indica	TIP_57679	Os08g0545700	OS08T0545700-01	0,011603636	0,673409912	0,118623375	up	R3	TIP	dry	126	0,936507937	chr08	27332286	LINE/unknown	chr08	27329441	27331356	+	Similar to TraB protein-related. (Os08t0545700-01)
indica	TIP_46950	Os07g0140633	OS07T0140633-00	0,011885431	0,244124852	0,118205525	up	R3	TIP	dry	126	0,595238095	chr07	2113296	LTR/Copia	chr07	2117854	2118368	-	Hypothetical gene. (Os07t0140633-00)
indica	TIP_26324	Os03g0784600	OS03T0784600-01	0,012415678	-0,571331159	0,117522873	down	R3	TIP	dry	126	0,96031746	chr03	32565521	MITE/Stow	chr03	32562874	32565104	-	Conserved hypothetical protein. (Os03t0784600-01)
indica	TIP_52066	Os07g0663600	OS07T0663600-01	0,013218425	-0,249336818	0,116583778	down	R3	TIP	dry	126	0,484126984	chr07	27996655	LTR/Gypsy	chr07	27995955	27997226	+	Short-chain dehydrogenase/reductase SDR domain containing protein. (Os07t0663600-01)
indica	TIP_41185	Os06g0210200	OS06T0210200-01	0,013369084	0,602128769	0,116089519	up	R3	TIP	dry	126	0,119047619	chr06	5626139	DNAnona/MULE	chr06	5621964	5625687	+	Peptidase M20 domain containing protein. (Os06t0210200-01)
indica	TIP_41184	Os06g0210200	OS06T0210200-01	0,013369084	-0,602128769	0,116089519	down	R3	TIP	dry	126	0,880952381	chr06	5621083	MITE/Tourist	chr06	5621964	5625687	+	Peptidase M20 domain containing protein. (Os06t0210200-01)
indica	TIP_9723	Os01g0954000	OS01T0954000-01	0,013369084	0,731645642	0,116019233	up	R3	TIP	dry	126	0,119047619	chr01	42023200	LTR/Copia	chr01	42018073	42019444	+	NADPH-dependent FMN reductase family protein. (Os01t0954000-01)
indica	TIP_29156	Os04g0379900	OS04T0379900-01	0,013369084	-0,47694432	0,115975543	down	R3	TIP	dry	126	0,238095238	chr04	18559927	SINE/unknown	chr04	18560190	18564376	-	Similar to Acyl-[acyl-carrier-protein] desaturase, chloroplast precursor (EC 1.14.19.2) (Stearoyl-ACP desaturase). (Os04t0379900-01)
indica	TIP_29157	Os04g0379900	OS04T0379900-01	0,013369084	-0,47694432	0,115975543	down	R3	TIP	dry	126	0,238095238	chr04	18562388	MITE/Tourist	chr04	18560190	18564376	-	Similar to Acyl-[acyl-carrier-protein] desaturase, chloroplast precursor (EC 1.14.19.2) (Stearoyl-ACP desaturase). (Os04t0379900-01)
indica	TIP_70995	Os11g0620000	OS11T0620000-01	0,013819891	-0,274979684	0,115427573	down	R3	TIP	dry	126	0,571428571	chr11	24169852	DNAnona/MULE	chr11	24166430	24169621	-	Peptidase S26A, signal peptidase I family protein. (Os11t0620000-01)
indica	TIP_2555	Os01g0286100	OS01T0286100-01	0,013819891	-0,576663018	0,115349271	down	R3	TIP	dry	126	0,238095238	chr01	10275976	LTR/Gypsy	chr01	10271157	10274304	-	Phytochrome-interacting factor-like protein, Basic helix-loop-helix factor, Repression of seedling growth in the dark (Os01t0286100-01)
indica	TIP_74153	Os12g0485000	OS12T0485000-01	0,014490378	-0,523898082	0,114620346	down	R3	TIP	dry	123	0,959349593	chr12	17922998	DNAnona/MULE	chr12	17924546	17931666	-	Similar to O-sialoglycoprotein endopeptidase. (Os12t0485000-01);Peptidase M22, glycoprotease domain containing protein. (Os12t0485000-02)
indica	TIP_53268	Os08g0158900	OS08T0158900-01	0,015183103	-0,330536186	0,113900815	down	R3	TIP	dry	118	0,415254237	chr08	3432485	MITE/Tourist	chr08	3432154	3438225	-	GTP1/OBG domain containing protein. (Os08t0158900-01)
indica	TIP_34973	Os05g0212400	OS05T0212400-01	0,016689078	0,556719067	0,112533087	up	R3	TIP	dry	124	0,887096774	chr05	6954460	MITE/Tourist	chr05	6957483	6964188	-	Similar to Uncharacterized plant-specific domain TIGR01589 family protein. (Os05t0212400-01)
indica	TIP_62375	Os09g0559600	OS09T0559600-01	0,017266523	-0,383937933	0,111985608	down	R3	TIP	dry	126	0,261904762	chr09	22239480	DNAauto/MULE	chr09	22235366	22235951	+	Thioredoxin domain 2 containing protein. (Os09t0559600-01)
indica	TIP_15109	Os02g0584800	OS02T0584800-01	0,01743288	0,734449467	0,111769601	up	R3	TIP	dry	126	0,888888889	chr02	22556362	MITE/Tourist	chr02	22553380	22554242	-	Heavy metal transport/detoxification protein domain containing protein. (Os02t0584800-01)
indica	TIP_2109	Os01g0256600	OS01T0256600-01	0,018533915	0,410378201	0,110853717	up	R3	TIP	dry	126	0,753968254	chr01	8559629	DNAnona/hAT	chr01	8555289	8557146	-	Ribosomal protein L18/L5 domain containing protein. (Os01t0256600-01)
indica	TIP_59638	Os09g0362800	OS09T0362800-01	0,018554151	0,114540908	0,110753888	up	R3	TIP	dry	126	0,119047619	chr09	11860496	LTR/Copia	chr09	11862271	11866452	+	Hypothetical conserved gene. (Os09t0362800-01);Peptidase M1, alanine aminopeptidase/leukotriene A4 hydrolase domain containing protein. (Os09t0362800-02)
indica	TIP_65	Os01g0105900	OS01T0105900-01	0,019135317	0,483527884	0,110251005	up	R3	TIP	dry	126	0,801587302	chr01	317978	MITE/Stow	chr01	309520	313170	-	PfkB carbohydrate kinase protein, Regulation of plant height and leaf structure (Os01t0105900-01)
indica	TIP_2128	Os01g0258600	OS01T0258600-00	0,019855507	0,38574365	0,109665658	up	R3	TIP	dry	125	0,744	chr01	8656782	DNAnona/MULE	chr01	8657066	8658466	+	Plant-specific small protein, Hybrid incompatibility, Pollen germination (Os01t0258600-01)
indica	TIP_61821	Os09g0518200	OS09T0518200-01	0,01993218	-0,515358385	0,109529827	down	R3	TIP	dry	124	0,943548387	chr09	20228228	MITE/Tourist	chr09	20222176	20223992	+	UDP:glucose salicylic acid glucosyltransferase, Chemically-induced disease resistance (Os09t0518200-01)
indica	TIP_63	Os01g0105900	OS01T0105900-01	0,020148959	-0,505684817	0,109268247	down	R3	TIP	dry	126	0,174603175	chr01	312684	MITE/Tourist	chr01	309520	313170	-	PfkB carbohydrate kinase protein, Regulation of plant height and leaf structure (Os01t0105900-01)
indica	TIP_46627	Os07g0110900	OS07T0110900-01	0,020148959	0,407755243	0,109217454	up	R3	TIP	dry	108	0,638888889	chr07	606924	MITE/Tourist	chr07	607685	608602	+	Conserved hypothetical protein. (Os07t0110900-01)
indica	TIP_5068	Os01g0595400	OS01T0595400-01	0,020296576	0,883177202	0,109036322	up	R3	TIP	dry	126	0,968253968	chr01	23341533	DNAnona/hAT	chr01	23333024	23337221	+	Protein of unknown function DUF538 family protein. (Os01t0595400-01)
indica	TIP_45934	Os06g0685700	OS06T0685700-01	0,020563862	0,949178325	0,108777131	up	R3	TIP	dry	125	0,968	chr06	28591140	MITE/Stow	chr06	28586492	28590205	+	Similar to Auxin response factor 16. (Os06t0685700-01)
indica	TIP_57398	Os08g0526700	OS08T0526700-00	0,020963276	-0,514976986	0,108329343	down	R3	TIP	dry	124	0,967741935	chr08	26212171	MITE/Stow	chr08	26214358	26218970	+	Similar to UBA/UBX 33.3 kDa protein. (Os08t0526700-00)
indica	TIP_5903	Os01g0653700	OS01T0653700-01	0,020963276	-0,463058366	0,108326187	down	R3	TIP	dry	126	0,968253968	chr01	26453131	MITE/Tourist	chr01	26449179	26452724	+	Cyclin-like F-box domain containing protein. (Os01t0653700-01);Cyclin-like F-box domain containing protein. (Os01t0653700-02)
indica	TIP_38756	Os05g0503300	OS05T0503300-02	0,020963276	-0,394800671	0,108274067	down	R3	TIP	dry	126	0,785714286	chr05	24782805	DNAnona/MULE	chr05	24777441	24782045	-	Similar to Sulfite reductase (Fragment). (Os05t0503300-02);Similar to ferredoxin-sulfite reductase precursor. (Os05t0503300-03)
indica	TIP_53493	Os08g0174100	OS08T0174100-00	0,023773896	-0,370999397	0,106484482	down	R3	TIP	dry	126	0,888888889	chr08	4318661	LTR/Copia	chr08	4316104	4318545	-	Similar to transferase family protein. (Os08t0174100-00)
indica	TIP_47231	Os07g0162500	OS07T0162500-02	0,02430766	0,48345572	0,106103247	up	R3	TIP	dry	125	0,864	chr07	3344555	DNAnona/MULE	chr07	3342219	3343596	-	Alpha/beta hydrolase fold-3 domain containing protein. (Os07t0162500-02)
indica	TIP_8081	Os01g0825800	OS01T0825800-02	0,024743305	-0,203825072	0,105782785	down	R3	TIP	dry	126	0,611111111	chr01	35321001	DNAnona/Helitron	chr01	35320840	35327164	-	Amino acid transporter, transmembrane domain containing protein. (Os01t0825800-01);Similar to Amino acid-polyamine transporter. (Os01t0825800-02)
indica	TIP_40526	Os06g0152550	OS06T0152550-01	0,024792899	0,719156302	0,105652694	up	R3	TIP	dry	123	0,073170732	chr06	2721158	LINE/unknown	chr06	2713853	2716174	+	Conserved hypothetical protein. (Os06t0152550-01)
indica	TIP_70823	Os11g0595200	OS11T0595200-01	0,024792899	-0,791346329	0,105599181	down	R3	TIP	dry	125	0,176	chr11	22660136	DNAauto/MULE	chr11	22660534	22662341	+	PAP fibrillin family protein. (Os11t0595200-01)
indica	TIP_66850	Os10g0568300	OS10T0568300-01	0,02488986	-0,261116417	0,105468558	down	R3	TIP	dry	126	0,317460317	chr10	22531900	DNAauto/POLE	chr10	22531145	22534379	-	Hypothetical conserved gene. (Os10t0568300-01)
indica	TIP_24227	Os03g0644200	OS03T0644200-01	0,026798953	0,3300787	0,104385679	up	R3	TIP	dry	126	0,722222222	chr03	24840829	MITE/Stow	chr03	24843343	24845622	-	Pentatricopeptide repeat domain containing protein. (Os03t0644200-01)
indica	TIP_71660	Os12g0120200	OS12T0120200-01	0,027574838	-0,343054716	0,103920378	down	R3	TIP	dry	126	0,857142857	chr12	967487	LTR/Copia	chr12	964545	969456	+	Similar to ATPase-like protein. (Os12t0120200-01);Similar to HIT domain containing protein. (Os12t0120200-02)
indica	TIP_53901	Os08g0227200	OS08T0227200-02	0,027581364	0,189901545	0,103840867	up	R3	TIP	dry	126	0,349206349	chr08	7756290	DNAnona/hAT	chr08	7760699	7762222	-	Kelch related domain containing protein. (Os08t0227200-02)
indica	TIP_26711	Os03g0815900	OS03T0815900-01	0,028316859	-0,399032544	0,103406573	down	R3	TIP	dry	126	0,76984127	chr03	34194775	DNAnona/MULE	chr03	34195226	34197990	-	Similar to DNA-directed RNA polymerase. (Os03t0815900-01)
indica	TIP_40411	Os06g0141166	OS06T0141166-00	0,029205363	0,265029998	0,102910225	up	R3	TIP	dry	125	0,408	chr06	2160808	MITE/Tourist	chr06	2157903	2160576	-	Similar to hydrolase, NUDIX family protein. (Os06t0141166-00)
indica	TIP_30311	Os04g0456700	OS04T0456700-01	0,031114517	0,565913511	0,101972181	up	R3	TIP	dry	110	0,854545455	chr04	22831379	DNAauto/MLE	chr04	22829317	22830301	+	Similar to TMV induced protein 1-2. (Os04t0456700-01)
indica	TIP_24698	Os03g0673700	OS03T0673700-01	0,031173944	0,519061561	0,101871475	up	R3	TIP	dry	115	0,252173913	chr03	26622142	DNAnona/CACTA	chr03	26622941	26623429	+	Similar to predicted protein. (Os03t0673700-01)
indica	TIP_74525	Os12g0527301	OS12T0527301-00	0,032292613	0,304066942	0,101306297	up	R3	TIP	dry	126	0,515873016	chr12	20783714	DNAauto/MULE	chr12	20781339	20781923	+	Hypothetical gene. (Os12t0527301-00)
indica	TIP_18868	Os03g0145600	OS03T0145600-01	0,032292613	-0,187035135	0,101242578	down	R3	TIP	dry	126	0,706349206	chr03	2526566	MITE/Tourist	chr03	2528998	2530420	-	WD40/YVTN repeat-like domain containing protein. (Os03t0145600-01)
indica	TIP_37375	Os05g0404400	OS05T0404400-02	0,032576086	0,324174663	0,101049872	up	R3	TIP	dry	126	0,579365079	chr05	19693132	MITE/Tourist	chr05	19691349	19694288	-	Similar to RPH1 (RESISTANCE TO PHYTOPHTHORA 1). (Os05t0404400-01);Similar to RPH1 (RESISTANCE TO PHYTOPHTHORA 1). (Os05t0404400-02)
indica	TIP_44242	Os06g0564700	OS06T0564700-01	0,032769406	-0,336625116	0,100838287	down	R3	TIP	dry	126	0,904761905	chr06	21729691	MITE/Stow	chr06	21730402	21733637	-	Similar to Cysteine synthase (EC 4.2.99.8). (Os06t0564700-01)
indica	TIP_14744	Os02g0556600	OS02T0556600-01	0,032769406	-0,407944935	0,100823301	down	R3	TIP	dry	125	0,76	chr02	21039576	DNAnona/MULE	chr02	21043834	21050336	-	Similar to Pherophorin-dz1 protein precursor. (Os02t0556600-01)
indica	TIP_16655	Os02g0701600	OS02T0701600-01	0,033706219	0,476388194	0,100366426	up	R3	TIP	dry	126	0,150793651	chr02	28894612	MITE/Tourist	chr02	28894065	28897418	+	Similar to Tocopherol O-methyltransferase, chloroplast precursor (EC 2.1.1.95) (Gamma-tocopherol methyltransferase). (Os02t0701600-01)
indica	TIP_8079	Os01g0825800	OS01T0825800-02	0,034650592	-0,45355994	0,099917395	down	R3	TIP	dry	125	0,952	chr01	35319475	DNAnona/Helitron	chr01	35320840	35327164	-	Amino acid transporter, transmembrane domain containing protein. (Os01t0825800-01);Similar to Amino acid-polyamine transporter. (Os01t0825800-02)
indica	TIP_41572	Os06g0236266	OS06T0236266-01	0,035470058	-0,245004519	0,099526762	down	R3	TIP	dry	126	0,317460317	chr06	7092867	DNAnona/unknown	chr06	7086668	7088509	-	Conserved hypothetical protein. (Os06t0236266-01)
indica	TIP_55352	Os08g0378900	OS08T0378900-02	0,035874097	0,360344115	0,099232934	up	R3	TIP	dry	126	0,222222222	chr08	17819158	MITE/Stow	chr08	17818457	17820510	-	Similar to Thioredoxin protein. (Os08t0378900-01);Subunit of PEP (Plastid-encoded RNA polymerase) in chloroplasts, Chloroplast development (Os08t0378900-02)
indica	TIP_41506	Os06g0232200	OS06T0232200-00	0,035874097	-0,519499155	0,099070803	down	R3	TIP	dry	126	0,142857143	chr06	6845695	MITE/Tourist	chr06	6842811	6848488	+	Similar to Fructokinase-2. (Os06t0232200-00)
indica	TIP_41510	Os06g0232200	OS06T0232200-00	0,035874097	-0,519499155	0,099070803	down	R3	TIP	dry	126	0,142857143	chr06	6851179	DNAnona/MULE	chr06	6842811	6848488	+	Similar to Fructokinase-2. (Os06t0232200-00)
indica	TIP_53979	Os08g0235550	OS08T0235550-01	0,035874097	0,231759232	0,098987518	up	R3	TIP	dry	125	0,424	chr08	8228017	DNAnona/MULE	chr08	8224155	8224982	-	Conserved hypothetical protein. (Os08t0235550-01)
indica	TIP_24690	Os03g0673600	OS03T0673600-01	0,035874097	0,823525718	0,098966965	up	R3	TIP	dry	124	0,258064516	chr03	26613339	MITE/Stow	chr03	26617086	26618211	-	Conserved hypothetical protein. (Os03t0673600-01)
indica	TIP_21550	Os03g0342100	OS03T0342100-01	0,035874097	-0,776705471	0,098949929	down	R3	TIP	dry	126	0,968253968	chr03	12754904	MITE/Tourist	chr03	12753654	12754664	-	Pollen Ole e 1 allergen/extensin domain containing protein. (Os03t0342100-01)
indica	TIP_41398	Os06g0225300	OS06T0225300-02	0,036172035	-0,20019068	0,098767875	down	R3	TIP	dry	126	0,825396825	chr06	6484782	DNAnona/MULE	chr06	6484167	6488553	-	Similar to SERK1 (Fragment). (Os06t0225300-01);Similar to SERK1 (Fragment). (Os06t0225300-02)
indica	TIP_6916	Os01g0728900	OS01T0728900-01	0,037419172	0,555864465	0,098191338	up	R3	TIP	dry	126	0,031746032	chr01	30398819	MITE/Tourist	chr01	30392737	30398178	+	Hypothetical protein. (Os01t0728900-01);Hypothetical protein. (Os01t0728900-02);Hypothetical gene. (Os01t0728900-03)
indica	TIP_27793	Os04g0188433	OS04T0188433-01	0,037419172	-0,925435862	0,09816774	down	R3	TIP	dry	126	0,896825397	chr04	5932236	DNAnona/MULE	chr04	5931193	5931871	-	Similar to OSIGBa0102N07.2 protein. (Os04t0188433-01)
indica	TIP_59883	Os09g0380400	OS09T0380400-01	0,038071973	0,40660907	0,097863385	up	R3	TIP	dry	126	0,785714286	chr09	12837802	DNAnona/MULE	chr09	12833971	12834961	+	Conserved hypothetical protein. (Os09t0380400-01)
indica	TIP_70581	Os11g0555600	OS11T0555600-01	0,039020091	0,281946794	0,097459547	up	R3	TIP	dry	126	0,738095238	chr11	20653358	DNAnona/MULEtir	chr11	20651030	20654076	-	Protein kinase, core domain containing protein. (Os11t0555600-01)
indica	TIP_32893	Os04g0653000	OS04T0653000-01	0,039099008	-0,428824809	0,097364472	down	R3	TIP	dry	126	0,738095238	chr04	33309489	MITE/Tourist	chr04	33306468	33310169	+	Jasmonic acid (JA) signalling repressor, Regulation of spikelet development (Os04t0653000-01)
indica	TIP_48085	Os07g0223766	OS07T0223766-01	0,039542336	-0,237912487	0,097143271	down	R3	TIP	dry	126	0,920634921	chr07	6854148	DNAnona/Helitron	chr07	6849842	6851728	-	Hypothetical conserved gene. (Os07t0223766-01)
indica	TIP_580	Os01g0158200	OS01T0158200-01	0,039798851	0,560387082	0,096988089	up	R3	TIP	dry	126	0,134920635	chr01	3051094	DNAnona/MULE	chr01	3054481	3057198	+	Similar to Serine carboxypeptidase II-1 precursor (EC 3.4.16.6) (CP-MII.1) (Fragment). (Os01t0158200-01)
indica	TIP_32657	Os04g0630400	OS04T0630400-01	0,040063326	-0,565092224	0,096802726	down	R3	TIP	dry	126	0,738095238	chr04	32061496	MITE/Tourist	chr04	32063756	32065731	+	NAD(P)-binding domain containing protein. (Os04t0630400-01)
indica	TIP_54776	Os08g0323000	OS08T0323000-01	0,040063326	-0,525618456	0,096696924	down	R3	TIP	dry	123	0,861788618	chr08	14108021	MITE/Stow	chr08	14105821	14113578	-	Similar to Signal recognition particle 68 kDa protein. (Os08t0323000-01)
indica	TIP_46974	Os07g0142900	OS07T0142900-01	0,040063326	-0,392762222	0,096681565	down	R3	TIP	dry	126	0,658730159	chr07	2191529	DNAnona/Helitron	chr07	2193809	2196930	+	Aldo/keto reductase family protein. (Os07t0142900-01)
indica	TIP_64687	Os10g0407500	OS10T0407500-00	0,040063326	0,341720114	0,096633473	up	R3	TIP	dry	126	0,031746032	chr10	13958466	MITE/Tourist	chr10	13954232	13958017	+	Similar to exonuclease. (Os10t0407500-00)
indica	TIP_32986	Os04g0659100	OS04T0659100-01	0,040078527	-0,621017104	0,096563047	down	R3	TIP	dry	126	0,96031746	chr04	33625596	DNAnona/Helitron	chr04	33624428	33631025	-	Chloroplastic glutamine synthetase, Reassimilation of the ammonia generated by photorespiration, Salt tolerance (Os04t0659100-01);Similar to Isoform 2 of Glutamine synthetase, chloroplastic. (Os04t0659100-02);Glutamine synthetase shoot isozyme, chloroplast precursor (EC 6.3.1.2) (Glutamate--ammonia ligase) (Clone lambda-GS31). (Os04t0659100-03)
indica	TIP_9722	Os01g0954000	OS01T0954000-01	0,041567424	-0,435526135	0,095999478	down	R3	TIP	dry	126	0,428571429	chr01	42022119	LTR/Copia	chr01	42018073	42019444	+	NADPH-dependent FMN reductase family protein. (Os01t0954000-01)
indica	TIP_51406	Os07g0605350	OS07T0605350-00	0,042728066	-0,369692193	0,095558282	down	R3	TIP	dry	116	0,232758621	chr07	24809219	MITE/Tourist	chr07	24805571	24805912	+	Similar to Protein EGG APPARATUS-1. (Os07t0605350-00)
indica	TIP_11285	Os02g0197200	OS02T0197200-01	0,043926129	-0,281765591	0,095087985	down	R3	TIP	dry	122	0,409836066	chr02	5441895	MITE/Stow	chr02	5442081	5447353	+	Mlo-related protein family protein. (Os02t0197200-01)
indica	TIP_21839	Os03g0360300	OS03T0360300-01	0,043926129	-0,640757917	0,095051678	down	R3	TIP	dry	126	0,952380952	chr03	13998775	SINE/unknown	chr03	13995812	13996647	-	Conserved hypothetical protein. (Os03t0360300-01)
indica	TIP_13333	Os02g0461600	OS02T0461600-02	0,044705884	-0,458916728	0,094747224	down	R3	TIP	dry	115	0,947826087	chr02	15477574	DNAnona/Helitron	chr02	15467205	15477399	-	Protein of unknown function DUF1777 domain containing protein. (Os02t0461600-01);Domain of unknown function DUF1777 domain containing protein. (Os02t0461600-02);Hypothetical gene. (Os02t0461600-03)
indica	TIP_14196	Os02g0522700	OS02T0522700-01	0,044801055	-0,522321345	0,094654654	down	R3	TIP	dry	126	0,96031746	chr02	19067973	DNAnona/Helitron	chr02	19058884	19063009	+	Hypothetical conserved gene. (Os02t0522700-01)
indica	TIP_61	Os01g0105900	OS01T0105900-01	0,044945478	0,454757748	0,094547436	up	R3	TIP	dry	126	0,80952381	chr01	307862	MITE/Stow	chr01	309520	313170	-	PfkB carbohydrate kinase protein, Regulation of plant height and leaf structure (Os01t0105900-01)
indica	TIP_45600	Os06g0664000	OS06T0664000-01	0,04508636	-0,390069974	0,094441718	down	R3	TIP	dry	126	0,912698413	chr06	27417659	SINE/unknown	chr06	27414193	27418088	-	Hypothetical gene. (Os06t0664000-01)
indica	TIP_1844	Os01g0238200	OS01T0238200-01	0,045861846	0,395462921	0,094145767	up	R3	TIP	dry	126	0,682539683	chr01	7656616	DNAnona/hAT	chr01	7652967	7656516	-	Conserved hypothetical protein. (Os01t0238200-01);Conserved hypothetical protein. (Os01t0238200-02)
indica	TIP_75580	Os12g0615400	OS12T0615400-01	0,046011523	-0,169585746	0,094038843	down	R3	TIP	dry	126	0,293650794	chr12	26103760	MITE/Stow	chr12	26101180	26103543	-	Similar to 37 kDa inner envelope membrane protein, chloroplast precursor (E37). (Os12t0615400-01)
indica	TIP_1781	Os01g0235100	OS01T0235100-01	0,048301473	0,30652542	0,093256525	up	R3	TIP	dry	123	0,699186992	chr01	7457221	DNAnona/MULE	chr01	7457835	7459834	+	Similar to predicted protein. (Os01t0235100-01)
indica	TIP_63931	Os10g0343100	OS10T0343100-01	0,048301473	-0,371706898	0,093250256	down	R3	TIP	dry	126	0,333333333	chr10	10174319	MITE/Tourist	chr10	10170579	10174444	+	Syntaxin 6, N-terminal domain containing protein. (Os10t0343100-01)
japonica	TIP_66361	Os10g0536100	OS10T0536100-01	6,39472E-22	1,994346368	0,755109297	up	R1	TIP	wet	74	0,391891892	chr10	20863697	DNAauto/PILE	chr10	20863187	20873635	+	MIKC-type MADS-box protein, Long day (LD)-specific negative regulator of flowering (Os10t0536100-01)
japonica	TIP_66865	Os10g0569800	OS10T0569800-00	1,55E-18	-2,877075975	0,697521638	down	R1	TIP	wet	82	0,451219512	chr10	22588030	DNAnona/hAT	chr10	22587847	22592131	+	Similar to RIR1b protein. (Os10t0569800-00)
japonica	TIP_75781	Os12g0628100	OS12T0628100-01	1,18192E-17	-3,067922681	0,678627224	down	R1	TIP	wet	82	0,109756098	chr12	26892919	MITE/Tourist	chr12	26888810	26890166	-	Similar to Actin-depolymerizing factor 6 (ADF-6) (AtADF6). (Os12t0628100-01)
japonica	TIP_73959	Os12g0448900	OS12T0448900-01	9,97E-17	1,698217231	0,658705569	up	R1	TIP	wet	80	0,6375	chr12	15340177	MITE/Tourist	chr12	15330237	15340502	-	Fatty acid alpha-dioxygenase family, Enzyme that oxygenates fatty acids into 2R-hydroperoxides (Os12t0448900-01)
japonica	TIP_37375	Os05g0404400	OS05T0404400-02	3,52718E-15	1,010596369	0,625030568	up	R1	TIP	wet	82	0,341463415	chr05	19693132	MITE/Tourist	chr05	19691349	19694288	-	Similar to RPH1 (RESISTANCE TO PHYTOPHTHORA 1). (Os05t0404400-01);Similar to RPH1 (RESISTANCE TO PHYTOPHTHORA 1). (Os05t0404400-02)
japonica	TIP_59978	Os09g0391501	OS09T0391501-00	2,06069E-14	1,122876353	0,606465713	up	R1	TIP	wet	82	0,256097561	chr09	13533197	MITE/Tourist	chr09	13533833	13534255	+	Hypothetical gene. (Os09t0391501-00)
japonica	TIP_54005	Os08g0237200	OS08T0237200-01	3,79956E-13	1,152560877	0,575356227	up	R1	TIP	wet	81	0,654320988	chr08	8350007	LTR/Gypsy	chr08	8342253	8346555	-	Mannose-1-phosphate guanyl transferase, GDP-mannose pyrophosphorylase (GMPase) homolog (Os08t0237200-01)
japonica	TIP_52367	Os07g0684000	OS07T0684000-01	1,69785E-12	1,377529706	0,557851787	up	R1	TIP	wet	82	0,43902439	chr07	29010390	DNAnona/MULE	chr07	29008876	29009943	+	S-type euonymus-related lectin (EUL), Response to salt and drought stress, ABA treatment, Response to biotic treatment (Os07t0684000-01)
japonica	TIP_64159	Os10g0365800	OS10T0365800-01	3,21635E-12	-0,743112648	0,54948966	down	R1	TIP	wet	82	0,707317073	chr10	11414519	DNAnona/hAT	chr10	11414311	11417030	+	Protein of unknown function DUF3615 domain containing protein. (Os10t0365800-01)
japonica	TIP_745	Os01g0175600	OS01T0175600-01	2,24865E-11	1,007309417	0,526046007	up	R1	TIP	wet	82	0,292682927	chr01	3881647	DNAnona/hAT	chr01	3878164	3884017	-	Boron (B) transporter (Os01t0175600-01)
japonica	TIP_58595	Os09g0251800	OS09T0251800-01	5,00226E-11	-1,161084361	0,515441188	down	R1	TIP	wet	82	0,158536585	chr09	3953012	LTR/Gypsy	chr09	3949859	3953247	+	C2 calcium-dependent membrane targeting domain containing protein. (Os09t0251800-01)
japonica	TIP_75782	Os12g0628100	OS12T0628100-01	5,15789E-11	-2,985447192	0,513517418	down	R1	TIP	wet	82	0,085365854	chr12	26894533	MITE/Tourist	chr12	26888810	26890166	-	Similar to Actin-depolymerizing factor 6 (ADF-6) (AtADF6). (Os12t0628100-01)
japonica	TIP_51333	Os07g0601000	OS07T0601000-01	5,15789E-11	-1,572350911	0,513067272	down	R1	TIP	wet	82	0,304878049	chr07	24518510	MITE/Stow	chr07	24515344	24517707	-	Similar to NADPH HC toxin reductase (Fragment). (Os07t0601000-01)
japonica	TIP_54626	Os08g0300501	OS08T0300501-00	6,17186E-10	-1,134569532	0,481281562	down	R1	TIP	wet	82	0,329268293	chr08	12369848	DNAauto/hAT	chr08	12370079	12372150	+	Conserved hypothetical protein. (Os08t0300501-00)
japonica	TIP_64322	Os10g0378100	OS10T0378100-01	6,17186E-10	-1,699965089	0,480445407	down	R1	TIP	wet	81	0,197530864	chr10	12094053	DNAauto/CACTA	chr10	12090264	12098560	-	Similar to Cytochrome P450 family protein, expressed. (Os10t0378100-01)
japonica	TIP_21734	Os03g0355900	OS03T0355900-00	9,9299E-10	-1,115308727	0,473474265	down	R1	TIP	wet	82	0,182926829	chr03	13611291	LTR/Gypsy	chr03	13608897	13609145	-	Hypothetical conserved gene. (Os03t0355900-00)
japonica	TIP_53493	Os08g0174100	OS08T0174100-00	2,68663E-09	-0,674425713	0,459580956	down	R1	TIP	wet	82	0,426829268	chr08	4318661	LTR/Copia	chr08	4316104	4318545	-	Similar to transferase family protein. (Os08t0174100-00)
japonica	TIP_543	Os01g0152700	OS01T0152700-01	4,64109E-09	0,974967805	0,451477034	up	R1	TIP	wet	82	0,597560976	chr01	2839521	LINE/unknown	chr01	2837892	2838171	-	Similar to Histone H2B (CaH2B). (Os01t0152700-01)
japonica	TIP_30793	Os04g0494300	OS04T0494300-00	1,09715E-08	-1,089543548	0,438979958	down	R1	TIP	wet	81	0,938271605	chr04	24712398	DNAauto/MULE	chr04	24712259	24717577	+	Hypothetical gene. (Os04t0494300-00)
japonica	TIP_39336	Os05g0546300	OS05T0546300-01	4,59847E-08	0,992211291	0,417418466	up	R1	TIP	wet	82	0,585365854	chr05	27121709	MITE/Tourist	chr05	27119121	27120202	+	Hypothetical protein. (Os05t0546300-01)
japonica	TIP_542	Os01g0152700	OS01T0152700-01	4,59847E-08	-0,942427095	0,417407842	down	R1	TIP	wet	82	0,390243902	chr01	2837603	SINE/unknown	chr01	2837892	2838171	-	Similar to Histone H2B (CaH2B). (Os01t0152700-01)
japonica	TIP_9851	Os01g0965400	OS01T0965400-01	5,07152E-08	1,121614896	0,415334753	up	R1	TIP	wet	82	0,158536585	chr01	42561773	DNAauto/MULE	chr01	42562823	42566993	+	Chloroplast-targeted UMP kinase, Regulation of leaf colour (Os01t0965400-01)
japonica	TIP_12831	Os02g0320300	OS02T0320300-01	6,15788E-08	1,294380695	0,411895416	up	R1	TIP	wet	82	0,073170732	chr02	12766312	LTR/Gypsy	chr02	12765282	12772010	+	Similar to Chalcone isomerase 3. (Os02t0320300-01)
japonica	TIP_58639	Os09g0256100	OS09T0256100-00	8,33537E-08	-0,570679212	0,406881931	down	R1	TIP	wet	82	0,829268293	chr09	4253519	MITE/Stow	chr09	4250749	4251832	+	Similar to flavonol 4-sulfotransferase. (Os09t0256100-00)
japonica	TIP_53491	Os08g0174100	OS08T0174100-00	8,40362E-08	0,628884009	0,406167583	up	R1	TIP	wet	82	0,536585366	chr08	4313658	MITE/Stow	chr08	4316104	4318545	-	Similar to transferase family protein. (Os08t0174100-00)
japonica	TIP_41037	Os06g0202300	OS06T0202300-01	1,00975E-07	-0,905292538	0,402906763	down	R1	TIP	wet	82	0,353658537	chr06	5158333	MITE/Tourist	chr06	5158231	5165171	+	Conserved hypothetical protein. (Os06t0202300-01)
japonica	TIP_27404	Os04g0121100	OS04T0121100-01	1,39535E-07	0,784744187	0,397585408	up	R1	TIP	wet	81	0,320987654	chr04	1249238	MITE/Tourist	chr04	1248450	1260282	+	Similar to OSIGBa0115D20.4 protein. (Os04t0121100-01)
japonica	TIP_41603	Os06g0239200	OS06T0239200-00	1,85588E-07	1,060667993	0,392809307	up	R1	TIP	wet	81	0,802469136	chr06	7230724	DNAnona/MULE	chr06	7230221	7230662	+	Conserved hypothetical protein. (Os06t0239200-00)
japonica	TIP_27094	Os03g0850600	OS03T0850600-01	5,67674E-07	0,626395233	0,375384362	up	R1	TIP	wet	82	0,195121951	chr03	35813040	DNAnona/PILE	chr03	35806060	35808891	-	Similar to Integral membrane protein. (Os03t0850600-01)
japonica	TIP_32055	Os04g0585700	OS04T0585700-01	8,69949E-07	-0,79892313	0,368289046	down	R1	TIP	wet	82	0,780487805	chr04	29592939	MITE/Tourist	chr04	29588252	29590515	-	Protein of unknown function DUF581 family protein. (Os04t0585700-01)
japonica	TIP_58637	Os09g0256100	OS09T0256100-00	1,21757E-06	0,573485121	0,362552534	up	R1	TIP	wet	82	0,146341463	chr09	4250407	LTR/TRIM	chr09	4250749	4251832	+	Similar to flavonol 4-sulfotransferase. (Os09t0256100-00)
japonica	TIP_32057	Os04g0585700	OS04T0585700-01	1,2483E-06	-0,764622356	0,36166708	down	R1	TIP	wet	81	0,75308642	chr04	29594995	LTR/Copia	chr04	29588252	29590515	-	Protein of unknown function DUF581 family protein. (Os04t0585700-01)
japonica	TIP_40181	Os06g0124900	OS06T0124900-01	1,49316E-06	-0,633000593	0,358377612	down	R1	TIP	wet	82	0,463414634	chr06	1343058	DNAnona/hAT	chr06	1341610	1344490	+	Conserved hypothetical protein. (Os06t0124900-01)
japonica	TIP_64162	Os10g0368400	OS10T0368400-01	1,80411E-06	0,682588473	0,354927855	up	R1	TIP	wet	82	0,231707317	chr10	11545391	SINE/unknown	chr10	11543109	11546028	-	Similar to Adapter-related protein complex 4 sigma 1 subunit (Sigma subunit of AP-4) (AP-4 adapter complex sigma subunit). (Os10t0368400-01)
japonica	TIP_34204	Os05g0161500	OS05T0161500-01	2,09332E-06	-1,101384465	0,352116637	down	R1	TIP	wet	82	0,170731707	chr05	3628628	DNAnona/hAT	chr05	3626394	3629080	+	Calcium-activated (p)ppGpp synthetase, Ca<sup>2+</sup>-activated RelA-SpoT homolog 2 (Os05t0161500-01)
japonica	TIP_41601	Os06g0239200	OS06T0239200-00	2,46543E-06	-1,052833083	0,349069084	down	R1	TIP	wet	81	0,172839506	chr06	7226860	DNAnona/Helitron	chr06	7230221	7230662	+	Conserved hypothetical protein. (Os06t0239200-00)
japonica	TIP_39336	Os05g0546500	OS05T0546500-00	3,19486E-06	-0,520737317	0,34449012	down	R1	TIP	wet	82	0,585365854	chr05	27121709	MITE/Tourist	chr05	27124468	27125316	-	Similar to Cell death-related protein. (Os05t0546500-00)
japonica	TIP_32891	Os04g0653000	OS04T0653000-01	4,01817E-06	0,598767179	0,340374936	up	R1	TIP	wet	82	0,707317073	chr04	33303047	MITE/Tourist	chr04	33306468	33310169	+	Jasmonic acid (JA) signalling repressor, Regulation of spikelet development (Os04t0653000-01)
japonica	TIP_744	Os01g0175600	OS01T0175600-01	5,43622E-06	0,868552901	0,335062156	up	R1	TIP	wet	81	0,234567901	chr01	3875827	DNAnona/MULE	chr01	3878164	3884017	-	Boron (B) transporter (Os01t0175600-01)
japonica	TIP_3498	Os01g0361000	OS01T0361000-02	1,32382E-05	0,854616761	0,320034672	up	R1	TIP	wet	82	0,817073171	chr01	14698199	LTR/Gypsy	chr01	14702436	14705998	-	Conserved hypothetical protein. (Os01t0361000-01);Conserved hypothetical protein. (Os01t0361000-02)
japonica	TIP_19661	Os03g0203800	OS03T0203800-01	1,58725E-05	0,666859012	0,316606619	up	R1	TIP	wet	82	0,780487805	chr03	5441200	MITE/Tourist	chr03	5441845	5444188	-	Cyclin D domain containing protein. (Os03t0203800-01)
japonica	TIP_39678	Os05g0573500	OS05T0573500-00	2,18114E-05	-0,675794867	0,310885772	down	R1	TIP	wet	82	0,914634146	chr05	28577894	MITE/Stow	chr05	28572426	28575154	+	CCAAT-box binding transcription factor, Chloroplast biogenesis (Os05t0573500-01)
japonica	TIP_20963	Os03g0299600	OS03T0299600-01	2,20964E-05	0,698507569	0,310272285	up	R1	TIP	wet	82	0,524390244	chr03	10523297	MITE/Tourist	chr03	10517166	10518361	-	Wound-induced protein, Wun1 domain containing protein. (Os03t0299600-01)
japonica	TIP_40867	Os06g0185900	OS06T0185900-01	2,24674E-05	-0,743979488	0,309605638	down	R1	TIP	wet	82	0,292682927	chr06	4322394	DNAnona/Helitron	chr06	4321654	4325071	+	Similar to Glutathione peroxidase. (Os06t0185900-01)
japonica	TIP_39118	Os05g0527200	OS05T0527200-00	2,72093E-05	-0,397118626	0,305997318	down	R1	TIP	wet	82	0,756097561	chr05	26206834	LTR/Copia	chr05	26205975	26206315	-	Similar to anthocyanidin 5,3-O-glucosyltransferase. (Os05t0527200-00)
japonica	TIP_40855	Os06g0184800	OS06T0184800-01	3,53834E-05	-0,590192394	0,301169782	down	R1	TIP	wet	82	0,682926829	chr06	4260021	MITE/Stow	chr06	4264424	4265115	-	Similar to Low-temperature induced protein lt101.1 (Blt101) (Blt101.1). (Os06t0184800-01)
japonica	TIP_65963	Os10g0506900	OS10T0506900-01	4,91497E-05	0,379945536	0,294994624	up	R1	TIP	wet	82	0,524390244	chr10	19376639	MITE/Stow	chr10	19379767	19382017	+	Hypothetical conserved gene. (Os10t0506900-01);Conserved hypothetical protein. (Os10t0506900-02);Conserved hypothetical protein. (Os10t0506900-03)
japonica	TIP_40866	Os06g0185900	OS06T0185900-01	4,91497E-05	-0,723603693	0,294828716	down	R1	TIP	wet	79	0,316455696	chr06	4320286	MITE/Tourist	chr06	4321654	4325071	+	Similar to Glutathione peroxidase. (Os06t0185900-01)
japonica	TIP_40856	Os06g0184900	OS06T0184900-01	5,26737E-05	-0,591774847	0,293285661	down	R1	TIP	wet	80	0,45	chr06	4265494	DNAnona/hAT	chr06	4269116	4270614	+	Transferase family protein. (Os06t0184900-01)
japonica	TIP_38480	Os05g0481500	OS05T0481500-01	6,98726E-05	-0,505697011	0,288064324	down	R1	TIP	wet	80	0,875	chr05	23678854	DNAnona/CACTG	chr05	23672800	23677294	-	K Homology domain containing protein. (Os05t0481500-01);K Homology domain containing protein. (Os05t0481500-02)
japonica	TIP_38609	Os05g0492100	OS05T0492100-01	8,72374E-05	-0,460363475	0,283869807	down	R1	TIP	wet	82	0,87804878	chr05	24188301	DNAnona/MULE	chr05	24183266	24189721	-	Hypothetical protein. (Os05t0492100-01)
japonica	TIP_67875	Os11g0184900	OS11T0184900-02	0,000122978	0,724673883	0,277533519	up	R1	TIP	wet	82	0,634146341	chr11	4306497	MITE/Tourist	chr11	4299277	4301784	-	Similar to OsNAC5 protein [imported]-rice. (Os11t0184900-01);NAC-type transcription factor, Regulation of stress-inducible genes, Stress tolerance (Os11t0184900-02)
japonica	TIP_32892	Os04g0653000	OS04T0653000-01	0,000137741	0,521274301	0,275208249	up	R1	TIP	wet	82	0,670731707	chr04	33303873	MITE/Tourist	chr04	33306468	33310169	+	Jasmonic acid (JA) signalling repressor, Regulation of spikelet development (Os04t0653000-01)
japonica	TIP_9781	Os01g0957200	OS01T0957200-01	0,000140825	-0,543661594	0,274489849	down	R1	TIP	wet	82	0,93902439	chr01	42190059	MITE/Tourist	chr01	42190489	42193879	+	Protein of unknown function DUF3411 domain containing protein. (Os01t0957200-01)
japonica	TIP_65945	Os10g0505700	OS10T0505700-01	0,000145119	-0,908407929	0,273637692	down	R1	TIP	wet	79	0,556962025	chr10	19334987	MITE/Tourist	chr10	19335093	19335615	-	Similar to Nonspecific lipid-transfer protein 2 (nsLTP2) (7 kDa lipid transfer protein). (Os10t0505700-01)
japonica	TIP_21209	Os03g0319000	OS03T0319000-01	0,000184482	0,728207555	0,269078797	up	R1	TIP	wet	82	0,695121951	chr03	11498923	SINE/unknown	chr03	11497788	11498619	+	Similar to VQ motif family protein, expressed. (Os03t0319000-01)
japonica	TIP_51891	Os07g0644600	OS07T0644600-01	0,000206216	0,521587089	0,266788591	up	R1	TIP	wet	80	0,725	chr07	26852762	MITE/Stow	chr07	26844725	26850314	+	Cytochrome P450 family protein. (Os07t0644600-01)
japonica	TIP_67871	Os11g0184900	OS11T0184900-02	0,000274869	0,714310828	0,261355643	up	R1	TIP	wet	82	0,658536585	chr11	4298264	MITE/Stow	chr11	4299277	4301784	-	Similar to OsNAC5 protein [imported]-rice. (Os11t0184900-01);NAC-type transcription factor, Regulation of stress-inducible genes, Stress tolerance (Os11t0184900-02)
japonica	TIP_1657	Os01g0227400	OS01T0227400-01	0,000323523	0,723755471	0,258128817	up	R1	TIP	wet	82	0,768292683	chr01	7049698	MITE/Stow	chr01	7049941	7050874	+	Similar to Cytochrome P450 71A1 (EC 1.14.-.-) (CYPLXXIA1) (ARP-2). (Os01t0227400-01)
japonica	TIP_9953	Os01g0976700	OS01T0976700-01	0,000327767	-0,672675131	0,257592893	down	R1	TIP	wet	82	0,134146341	chr01	43166252	LTR/Copia	chr01	43163463	43166882	-	Similar to Protein phosphatase 2C-like protein. (Os01t0976700-01)
japonica	TIP_69223	Os11g0417300	OS11T0417300-01	0,000349229	-0,516042957	0,256155239	down	R1	TIP	wet	82	0,902439024	chr11	12853081	LINE/unknown	chr11	12849214	12853420	+	Hypothetical gene. (Os11t0417300-01);Conserved hypothetical protein. (Os11t0417300-02)
japonica	TIP_8592	Os01g0869800	OS01T0869800-01	0,000367074	0,737153493	0,25496493	up	R1	TIP	wet	82	0,951219512	chr01	37695386	DNAauto/MULE	chr01	37697024	37699582	+	22-kDa Photosystem II protein, Photoprotection (Os01t0869800-01)
japonica	TIP_30656	Os04g0483400	OS04T0483400-01	0,000399898	-0,888052939	0,253131115	down	R1	TIP	wet	82	0,963414634	chr04	24168259	DNAnona/Helitron	chr04	24161435	24165181	-	Similar to H0805A05.2 protein. (Os04t0483400-01)
japonica	TIP_67873	Os11g0184900	OS11T0184900-02	0,00040246	-0,723551138	0,252731252	down	R1	TIP	wet	82	0,304878049	chr11	4305229	DNAnona/MULE	chr11	4299277	4301784	-	Similar to OsNAC5 protein [imported]-rice. (Os11t0184900-01);NAC-type transcription factor, Regulation of stress-inducible genes, Stress tolerance (Os11t0184900-02)
japonica	TIP_40146	Os06g0115300	OS06T0115300-01	0,000491563	0,754460163	0,248828449	up	R1	TIP	wet	82	0,426829268	chr06	862944	MITE/Stow	chr06	860908	862566	-	Acyl-CoA-binding protein , Stress response (Os06t0115300-01)
japonica	TIP_61872	Os09g0523200	OS09T0523200-00	0,000810679	-0,304026786	0,239419429	down	R1	TIP	wet	82	0,902439024	chr09	20437272	MITE/Stow	chr09	20434450	20435065	-	Hypothetical conserved gene. (Os09t0523200-00)
japonica	TIP_37832	Os05g0430900	OS05T0430900-01	0,000909485	-0,574888495	0,237030006	down	R1	TIP	wet	82	0,963414634	chr05	21149213	DNAnona/MULE	chr05	21144334	21148363	-	TGF-beta receptor, type I/II extracellular region family protein. (Os05t0430900-01)
japonica	TIP_68080	Os11g0208900	OS11T0208900-01	0,001108991	0,835573204	0,233099822	up	R1	TIP	wet	72	0,819444444	chr11	5592886	DNAnona/MULE	chr11	5592564	5603077	-	Leucine rich repeat containing protein kinase. (Os11t0208900-01)
japonica	TIP_27406	Os04g0121100	OS04T0121100-01	0,001192457	0,569572747	0,231487602	up	R1	TIP	wet	82	0,390243902	chr04	1257157	MITE/Tourist	chr04	1248450	1260282	+	Similar to OSIGBa0115D20.4 protein. (Os04t0121100-01)
japonica	TIP_54485	Os08g0288050	OS08T0288050-01	0,001394743	0,69408164	0,228314798	up	R1	TIP	wet	82	0,341463415	chr08	11439164	LTR/Gypsy	chr08	11437989	11440989	+	Hypothetical conserved gene. (Os08t0288050-01)
japonica	TIP_32893	Os04g0653000	OS04T0653000-01	0,001422286	-0,5281066	0,22768777	down	R1	TIP	wet	82	0,231707317	chr04	33309489	MITE/Tourist	chr04	33306468	33310169	+	Jasmonic acid (JA) signalling repressor, Regulation of spikelet development (Os04t0653000-01)
japonica	TIP_72762	Os12g0228800	OS12T0228800-01	0,001465573	0,413019494	0,226708571	up	R1	TIP	wet	82	0,62195122	chr12	7011790	MITE/Stow	chr12	7014180	7014828	-	Similar to Calmodulin-like protein. (Os12t0228800-01)
japonica	TIP_41614	Os06g0239700	OS06T0239700-01	0,001465573	-0,641842945	0,226360053	down	R1	TIP	wet	82	0,170731707	chr06	7263310	DNAnona/MULE	chr06	7260409	7263955	+	Conserved hypothetical protein. (Os06t0239700-01)
japonica	TIP_41613	Os06g0239700	OS06T0239700-01	0,001465573	0,641842945	0,226360053	up	R1	TIP	wet	82	0,829268293	chr06	7261698	MITE/Stow	chr06	7260409	7263955	+	Conserved hypothetical protein. (Os06t0239700-01)
japonica	TIP_73655	Os12g0425800	OS12T0425800-01	0,001477475	0,468004467	0,225959473	up	R1	TIP	wet	82	0,231707317	chr12	13510057	DNAnona/Helitron	chr12	13512112	13513425	-	Hypothetical protein. (Os12t0425800-01)
japonica	TIP_19418	Os03g0188100	OS03T0188100-01	0,001704407	1,399521939	0,223046848	up	R1	TIP	wet	82	0,036585366	chr03	4603747	LTR/Gypsy	chr03	4606945	4616239	+	Similar to transparent testa 12 protein. (Os03t0188100-01);Multidrug and toxic compound extrusion (MATE) protein family transporter, Regulation of plant growth and development, Disease resistance (Os03t0188100-02)
japonica	TIP_2492	Os01g0281100	OS01T0281100-01	0,002124865	0,494561323	0,218672461	up	R1	TIP	wet	82	0,743902439	chr01	10008036	LTR/TRIM	chr01	10008075	10011595	-	Conserved hypothetical protein. (Os01t0281100-01)
japonica	TIP_173	Os01g0117900	OS01T0117900-03	0,002246902	-0,441643076	0,217380988	down	R1	TIP	wet	82	0,426829268	chr01	1014161	SINE/unknown	chr01	1010259	1012400	+	Similar to nodulin-like protein. (Os01t0117900-01);Similar to Nodulin-like protein 5NG4. (Os01t0117900-02);Similar to nodulin-like protein. (Os01t0117900-03)
japonica	TIP_45962	Os06g0688200	OS06T0688200-00	0,002670083	-0,235696144	0,213891223	down	R1	TIP	wet	82	0,695121951	chr06	28707158	LINE/unknown	chr06	28707334	28708349	-	Similar to blight-associated protein p12. (Os06t0688200-00)
japonica	TIP_54046	Os08g0241300	OS08T0241300-01	0,003221905	-0,403217562	0,210101751	down	R1	TIP	wet	80	0,825	chr08	8578439	DNAnona/MULE	chr08	8570830	8575238	+	Similar to OSIGBa0118P15.3 protein. (Os08t0241300-01)
japonica	TIP_398	Os01g0138900	OS01T0138900-01	0,003487697	-0,637189572	0,208363289	down	R1	TIP	wet	82	0,134146341	chr01	2070572	LTR/Gypsy	chr01	2074795	2077903	-	Mandelate racemase/muconate lactonizing enzyme family protein. (Os01t0138900-01)
japonica	TIP_544	Os01g0152900	OS01T0152900-00	0,003558838	-0,508722221	0,20774705	down	R1	TIP	wet	82	0,414634146	chr01	2844146	MITE/Tourist	chr01	2844503	2845212	-	Similar to Histone H2B.1. (Os01t0152900-00)
japonica	TIP_51891	Os07g0644700	OS07T0644700-00	0,003560915	-0,165254457	0,20750577	down	R1	TIP	wet	80	0,725	chr07	26852762	MITE/Stow	chr07	26852741	26854622	+	Hypothetical conserved gene. (Os07t0644700-00)
japonica	TIP_11564	Os02g0222100	OS02T0222100-01	0,003589669	-0,37453192	0,207125468	down	R1	TIP	wet	82	0,62195122	chr02	6806671	MITE/Stow	chr02	6810648	6814078	+	Similar to Cysteine synthase (EC 4.2.99.8). (Os02t0222100-01)
japonica	TIP_64543	Os10g0397800	OS10T0397800-00	0,003681768	-0,593833456	0,206418986	down	R1	TIP	wet	82	0,926829268	chr10	13389495	DNAnona/hAT	chr10	13387600	13388592	-	Mitochondrial carrier protein family protein. (Os10t0397800-00)
japonica	TIP_45761	Os06g0672700	OS06T0672700-01	0,003703247	-1,305131226	0,20608592	down	R1	TIP	wet	82	0,963414634	chr06	27921012	MITE/Stow	chr06	27923541	27926280	-	Conserved hypothetical protein. (Os06t0672700-01)
japonica	TIP_28709	Os04g0338100	OS04T0338100-01	0,003889679	-0,739750642	0,204931068	down	R1	TIP	wet	82	0,780487805	chr04	15927749	LTR/Copia	chr04	15924375	15928109	+	Similar to IN2-2 protein. (Os04t0338100-01)
japonica	TIP_40857	Os06g0185100	OS06T0185100-00	0,004132842	-0,463607069	0,203557671	down	R1	TIP	wet	82	0,292682927	chr06	4280922	DNAnona/hAT	chr06	4276289	4277154	+	Similar to estradiol 17-beta-dehydrogenase 8. (Os06t0185100-00)
japonica	TIP_32894	Os04g0653000	OS04T0653000-01	0,004226948	0,45670526	0,202716573	up	R1	TIP	wet	82	0,695121951	chr04	33310571	MITE/Tourist	chr04	33306468	33310169	+	Jasmonic acid (JA) signalling repressor, Regulation of spikelet development (Os04t0653000-01)
japonica	TIP_44404	Os06g0581300	OS06T0581300-01	0,004226948	-0,77228689	0,202699361	down	R1	TIP	wet	82	0,841463415	chr06	22700337	MITE/Tourist	chr06	22699043	22704976	+	Hypothetical conserved gene. (Os06t0581300-01);Protein of unknown function DUF1475 family protein. (Os06t0581300-02)
japonica	TIP_41250	Os06g0215900	OS06T0215900-01	0,004479744	0,455826153	0,201378894	up	R1	TIP	wet	82	0,353658537	chr06	5895954	MITE/Tourist	chr06	5894911	5896347	-	Similar to Oxo-phytodienoic acid reductase. (Os06t0215900-01);Similar to 12-oxophytodienoic acid reductase. (Os06t0215900-02)
japonica	TIP_61873	Os09g0523200	OS09T0523200-00	0,004556149	-0,383301929	0,200562895	down	R1	TIP	wet	82	0,951219512	chr09	20438840	DNAnona/hAT	chr09	20434450	20435065	-	Hypothetical conserved gene. (Os09t0523200-00)
japonica	TIP_39335	Os05g0546500	OS05T0546500-00	0,004556149	-0,5076645	0,200493956	down	R1	TIP	wet	80	0,8125	chr05	27120418	DNAnona/MULE	chr05	27124468	27125316	-	Similar to Cell death-related protein. (Os05t0546500-00)
japonica	TIP_66991	Os10g0580500	OS10T0580500-00	0,004556149	-0,450970205	0,200435308	down	R1	TIP	wet	82	0,87804878	chr10	23168284	LTR/Copia	chr10	23160823	23184731	-	Essential protein Yae1, N-terminal domain containing protein. (Os10t0580500-00)
japonica	TIP_3589	Os01g0369900	OS01T0369900-01	0,005343639	-0,466084295	0,197177622	down	R1	TIP	wet	82	0,792682927	chr01	15187367	DNAnona/hAT	chr01	15185168	15188301	-	Similar to 12-oxo-phytodienoic acid reductase6. (Os01t0369900-01)
japonica	TIP_21091	Os03g0310600	OS03T0310600-01	0,005390474	0,309698385	0,196802174	up	R1	TIP	wet	82	0,475609756	chr03	11083194	MITE/Tourist	chr03	11081670	11083185	-	Protein of unknown function DUF247, plant family protein. (Os03t0310600-01)
japonica	TIP_61821	Os09g0518200	OS09T0518200-01	0,005390474	-0,534900956	0,196610118	down	R1	TIP	wet	81	0,938271605	chr09	20228228	MITE/Tourist	chr09	20222176	20223992	+	UDP:glucose salicylic acid glucosyltransferase, Chemically-induced disease resistance (Os09t0518200-01)
japonica	TIP_51890	Os07g0644600	OS07T0644600-01	0,005649754	0,411775459	0,195404174	up	R1	TIP	wet	82	0,646341463	chr07	26851645	DNAnona/unknown	chr07	26844725	26850314	+	Cytochrome P450 family protein. (Os07t0644600-01)
japonica	TIP_41589	Os06g0238300	OS06T0238300-01	0,005649754	0,611628397	0,195315225	up	R1	TIP	wet	77	0,883116883	chr06	7191768	DNAnona/MULE	chr06	7188427	7191440	-	FMN-binding split barrel domain containing protein. (Os06t0238300-01)
japonica	TIP_36639	Os05g0351500	OS05T0351500-01	0,005753461	-0,535044856	0,194772087	down	R1	TIP	wet	82	0,926829268	chr05	16621831	MITE/Stow	chr05	16622355	16625788	-	Sgf11, transcriptional regulation family protein. (Os05t0351500-01)
japonica	TIP_15111	Os02g0584800	OS02T0584800-01	0,005767087	-0,77327814	0,194535124	down	R1	TIP	wet	82	0,865853659	chr02	22558673	MITE/Stow	chr02	22553380	22554242	-	Heavy metal transport/detoxification protein domain containing protein. (Os02t0584800-01)
japonica	TIP_543	Os01g0152900	OS01T0152900-00	0,00597883	0,493433427	0,193651314	up	R1	TIP	wet	82	0,597560976	chr01	2839521	LINE/unknown	chr01	2844503	2845212	-	Similar to Histone H2B.1. (Os01t0152900-00)
japonica	TIP_72761	Os12g0228800	OS12T0228800-01	0,006458465	0,40033026	0,191975882	up	R1	TIP	wet	82	0,695121951	chr12	7011488	MITE/Stow	chr12	7014180	7014828	-	Similar to Calmodulin-like protein. (Os12t0228800-01)
japonica	TIP_59095	Os09g0299300	OS09T0299300-00	0,006581251	-0,652765105	0,191426049	down	R1	TIP	wet	82	0,902439024	chr09	7337364	MITE/Stow	chr09	7334523	7335240	+	Similar to predicted protein. (Os09t0299300-00)
japonica	TIP_697	Os01g0170900	OS01T0170900-01	0,006665706	-0,751520458	0,190995158	down	R1	TIP	wet	82	0,951219512	chr01	3665958	SINE/unknown	chr01	3665042	3666044	-	Conserved hypothetical protein. (Os01t0170900-01)
japonica	TIP_51880	Os07g0643400	OS07T0643400-01	0,006812154	-0,571239073	0,190392328	down	R1	TIP	wet	82	0,280487805	chr07	26786932	LTR/unknown	chr07	26790870	26792040	-	Alpha/beta hydrolase fold-3 domain containing protein. (Os07t0643400-01)
japonica	TIP_64408	Os10g0389300	OS10T0389300-01	0,007084297	-1,266266604	0,189453682	down	R1	TIP	wet	82	0,963414634	chr10	12897453	DNAnona/CACTG	chr10	12890904	12894595	-	Similar to Red chlorophyll catabolite reductase (Fragment). (Os10t0389300-01);Red chlorophyll catabolite reductase (Os10t0389300-02)
japonica	TIP_46950	Os07g0140633	OS07T0140633-00	0,00732601	0,295411135	0,188624686	up	R1	TIP	wet	82	0,06097561	chr07	2113296	LTR/Copia	chr07	2117854	2118368	-	Hypothetical gene. (Os07t0140633-00)
japonica	TIP_40856	Os06g0184800	OS06T0184800-01	0,007435617	0,441765057	0,188158814	up	R1	TIP	wet	80	0,45	chr06	4265494	DNAnona/hAT	chr06	4264424	4265115	-	Similar to Low-temperature induced protein lt101.1 (Blt101) (Blt101.1). (Os06t0184800-01)
japonica	TIP_483	Os01g0147700	OS01T0147700-01	0,007553278	0,395177123	0,187677912	up	R1	TIP	wet	82	0,451219512	chr01	2575978	SINE/unknown	chr01	2579565	2583575	-	Region of unknown function XH domain containing protein. (Os01t0147700-01)
japonica	TIP_41572	Os06g0236300	OS06T0236300-01	0,007995627	-0,569880856	0,186399414	down	R1	TIP	wet	82	0,158536585	chr06	7092867	DNAnona/unknown	chr06	7093925	7096087	+	Conserved hypothetical protein. (Os06t0236300-01)
japonica	TIP_33980	Os05g0147100	OS05T0147100-01	0,008102545	-0,466472482	0,185871843	down	R1	TIP	wet	79	0,215189873	chr05	2704541	DNAnona/hAT	chr05	2703819	2705345	-	Conserved hypothetical protein. (Os05t0147100-01)
japonica	TIP_67392	Os11g0150800	OS11T0150800-01	0,008102545	0,488087784	0,185795297	up	R1	TIP	wet	82	0,792682927	chr11	2363757	DNAnona/MULEtir	chr11	2363882	2364482	+	Hypothetical protein. (Os11t0150800-01)
japonica	TIP_67074	Os11g0112800	OS11T0112800-01	0,008743161	-0,859900624	0,184146464	down	R1	TIP	wet	81	0,962962963	chr11	588661	LTR/Gypsy	chr11	592270	594666	+	Saposin-like domain containing protein. (Os11t0112800-01)
japonica	TIP_12828	Os02g0320300	OS02T0320300-01	0,008871568	1,199011703	0,183693273	up	R1	TIP	wet	82	0,036585366	chr02	12762302	MITE/Stow	chr02	12765282	12772010	+	Similar to Chalcone isomerase 3. (Os02t0320300-01)
japonica	TIP_2555	Os01g0286100	OS01T0286100-01	0,009035031	-0,52823674	0,183169816	down	R1	TIP	wet	82	0,219512195	chr01	10275976	LTR/Gypsy	chr01	10271157	10274304	-	Phytochrome-interacting factor-like protein, Basic helix-loop-helix factor, Repression of seedling growth in the dark (Os01t0286100-01)
japonica	TIP_39460	Os05g0556700	OS05T0556700-01	0,009578793	-0,615093932	0,18186519	down	R1	TIP	wet	82	0,93902439	chr05	27689928	DNAnona/MULE	chr05	27686725	27688323	+	Similar to Cct2-prov protein. (Os05t0556700-01)
japonica	TIP_32282	Os04g0604250	OS04T0604250-01	0,010426145	-0,688206174	0,180047003	down	R1	TIP	wet	82	0,719512195	chr04	30482181	LINE/unknown	chr04	30477844	30478399	-	Conserved hypothetical protein. (Os04t0604250-01)
japonica	TIP_8920	Os01g0895600	OS01T0895600-01	0,010671024	0,386174046	0,179429287	up	R1	TIP	wet	82	0,658536585	chr01	38934290	DNAnona/MULE	chr01	38930465	38934752	-	Similar to Calreticulin-3. (Os01t0895600-01)
japonica	TIP_51480	Os07g0614000	OS07T0614000-02	0,011448599	0,304996152	0,177777596	up	R1	TIP	wet	81	0,160493827	chr07	25288317	MITE/Stow	chr07	25287541	25290131	+	Six-bladed beta-propeller, TolB-like domain containing protein. (Os07t0614000-01);Six-bladed beta-propeller, TolB-like domain containing protein. (Os07t0614000-02)
japonica	TIP_9821	Os01g0961300	OS01T0961300-01	0,011448599	0,425094248	0,177729686	up	R1	TIP	wet	82	0,731707317	chr01	42380750	MITE/Tourist	chr01	42385629	42388987	+	Conserved hypothetical protein. (Os01t0961300-01)
japonica	TIP_49840	Os07g0480900	OS07T0480900-01	0,011776395	0,373056099	0,177016649	up	R1	TIP	wet	81	0,086419753	chr07	17496454	MITE/Tourist	chr07	17496502	17498002	+	Similar to Cysteine protease (Fragment). (Os07t0480900-01)
japonica	TIP_59683	Os09g0367900	OS09T0367900-02	0,012168592	-0,483390909	0,176215761	down	R1	TIP	wet	82	0,951219512	chr09	12124405	MITE/Tourist	chr09	12126815	12127993	+	Conserved hypothetical protein. (Os09t0367900-01);Hypothetical conserved gene. (Os09t0367900-02)
japonica	TIP_72683	Os12g0210300	OS12T0210300-01	0,013218964	-0,570471776	0,174434956	down	R1	TIP	wet	82	0,817073171	chr12	5756511	DNAnona/MULE	chr12	5760537	5763699	+	Zeta class glutathione transferase, Cold tolerance (Os12t0210300-01)
japonica	TIP_45963	Os06g0688200	OS06T0688200-00	0,013314343	-0,376317878	0,174136448	down	R1	TIP	wet	80	0,925	chr06	28707859	MITE/Tourist	chr06	28707334	28708349	-	Similar to blight-associated protein p12. (Os06t0688200-00)
japonica	TIP_49046	Os07g0409100	OS07T0409100-01	0,013750677	-0,5499635	0,173290174	down	R1	TIP	wet	82	0,585365854	chr07	12747262	DNAnona/MULE	chr07	12747743	12760653	+	Synaptotagmin-5 protein, Ca<sup>2+</sup> sensing protein with a C2 domain, Drought tolerance (Os07t0409100-01)
japonica	TIP_49904	Os07g0486500	OS07T0486500-02	0,013750677	-0,473934533	0,173192258	down	R1	TIP	wet	82	0,182926829	chr07	17912109	MITE/Tourist	chr07	17907341	17912298	+	RhoGAP domain containing protein. (Os07t0486500-01);RhoGAP domain containing protein. (Os07t0486500-02)
japonica	TIP_39690	Os05g0574400	OS05T0574400-01	0,014580688	1,306463007	0,171887036	up	R1	TIP	wet	82	0,93902439	chr05	28617551	MITE/Tourist	chr05	28617700	28621468	-	Similar to Malate dehydrogenase. (Os05t0574400-01)
japonica	TIP_75816	Os12g0632700	OS12T0632700-01	0,015311008	-0,584879045	0,170604345	down	R1	TIP	wet	82	0,146341463	chr12	27102058	MITE/Tourist	chr12	27094649	27099336	-	Malate dehydrogenase, Salt stress response (Os12t0632700-01)
japonica	TIP_63931	Os10g0343100	OS10T0343100-01	0,015311008	-0,49195932	0,170461198	down	R1	TIP	wet	82	0,207317073	chr10	10174319	MITE/Tourist	chr10	10170579	10174444	+	Syntaxin 6, N-terminal domain containing protein. (Os10t0343100-01)
japonica	TIP_9824	Os01g0962400	OS01T0962400-01	0,015311008	-0,417365139	0,170439386	down	R1	TIP	wet	82	0,780487805	chr01	42419310	LINE/unknown	chr01	42419408	42421376	-	Ubiquitin-like, Ufm1 domain containing protein. (Os01t0962400-01)
japonica	TIP_27382	Os04g0117900	OS04T0117900-01	0,015311008	0,417417531	0,170320714	up	R1	TIP	wet	82	0,731707317	chr04	1049810	DNAnona/MULE	chr04	1054609	1070887	+	Amidase family protein. (Os04t0117900-01)
japonica	TIP_29101	Os04g0373400	OS04T0373400-01	0,015362562	0,324823274	0,170106016	up	R1	TIP	wet	82	0,390243902	chr04	18217361	DNAauto/Helitron	chr04	18212946	18216660	+	Similar to MATE efflux family protein, expressed. (Os04t0373400-01)
japonica	TIP_68116	Os11g0210600	OS11T0210600-01	0,020887929	0,669917458	0,163894551	up	R1	TIP	wet	82	0,243902439	chr11	5761279	MITE/Tourist	chr11	5755644	5758642	-	Similar to Alcohol dehydrogenase (Fragment). (Os11t0210600-01)
japonica	TIP_695	Os01g0170600	OS01T0170600-02	0,021563829	-0,719866923	0,163117001	down	R1	TIP	wet	82	0,463414634	chr01	3651493	DNAnona/MULE	chr01	3645508	3650691	+	Hypothetical conserved gene. (Os01t0170600-01);UspA domain containing protein. (Os01t0170600-02)
japonica	TIP_48894	Os07g0287100	OS07T0287100-01	0,022220625	-0,511125981	0,162376536	down	R1	TIP	wet	82	0,207317073	chr07	11063346	MITE/Tourist	chr07	11064783	11076991	+	Conserved hypothetical protein. (Os07t0287100-01)
japonica	TIP_62634	Os10g0112700	OS10T0112700-01	0,023027655	-0,340686879	0,161524244	down	R1	TIP	wet	82	0,731707317	chr10	852100	SINE/unknown	chr10	848170	850210	-	Serine/threonine protein kinase-related domain containing protein. (Os10t0112700-01)
japonica	TIP_51406	Os07g0605350	OS07T0605350-00	0,023191762	-0,906603393	0,161239213	down	R1	TIP	wet	81	0,950617284	chr07	24809219	MITE/Tourist	chr07	24805571	24805912	+	Similar to Protein EGG APPARATUS-1. (Os07t0605350-00)
japonica	TIP_44697	Os06g0609500	OS06T0609500-01	0,023639099	-0,347981114	0,16071702	down	R1	TIP	wet	82	0,256097561	chr06	24268961	LTR/Gypsy	chr06	24268909	24273342	+	Homeodomain-like containing protein. (Os06t0609500-01)
japonica	TIP_57577	Os08g0538600	OS08T0538600-01	0,02476919	-0,468907959	0,159647804	down	R1	TIP	wet	82	0,207317073	chr08	26918006	DNAnona/MULE	chr08	26918197	26921534	+	Stress up-regulated Nod 19 family protein. (Os08t0538600-01)
japonica	TIP_40475	Os06g0147000	OS06T0147000-01	0,027217959	-0,533109329	0,157632684	down	R1	TIP	wet	80	0,2125	chr06	2453895	MITE/Tourist	chr06	2453481	2454046	-	Conserved hypothetical protein. (Os06t0147000-01)
japonica	TIP_9823	Os01g0962400	OS01T0962400-01	0,031574376	-0,425912313	0,154415026	down	R1	TIP	wet	81	0,814814815	chr01	42418306	LINE/unknown	chr01	42419408	42421376	-	Ubiquitin-like, Ufm1 domain containing protein. (Os01t0962400-01)
japonica	TIP_5217	Os01g0607900	OS01T0607900-01	0,031574376	-0,34297684	0,15436435	down	R1	TIP	wet	82	0,914634146	chr01	23979817	DNAnona/hAT	chr01	23976021	23981901	-	Serine/threonine protein kinase-related domain containing protein. (Os01t0607900-01)
japonica	TIP_36305	Os05g0320800	OS05T0320800-01	0,031574376	-0,629407088	0,154133872	down	R1	TIP	wet	82	0,158536585	chr05	14903317	MITE/Tourist	chr05	14906587	14907252	+	Hypothetical protein. (Os05t0320800-01)
japonica	TIP_42630	Os06g0331500	OS06T0331500-01	0,031574376	-0,437283931	0,154118243	down	R1	TIP	wet	76	0,855263158	chr06	13115452	DNAnona/MULE	chr06	13120298	13120764	+	Conserved hypothetical protein. (Os06t0331500-01)
japonica	TIP_11580	Os02g0223700	OS02T0223700-01	0,03166134	0,331447326	0,15392628	up	R1	TIP	wet	82	0,609756098	chr02	6920508	MITE/Tourist	chr02	6915418	6916621	+	Protein of unknown function DUF3511 domain containing protein. (Os02t0223700-01)
japonica	TIP_27472	Os04g0136900	OS04T0136900-01	0,032559555	0,412779515	0,153000972	up	R1	TIP	wet	82	0,731707317	chr04	2447339	LTR/Copia	chr04	2441510	2447771	+	Similar to OSIGBa0147B06.6 protein. (Os04t0136900-01)
japonica	TIP_65865	Os10g0498200	OS10T0498200-01	0,032559555	-0,456335011	0,152973545	down	R1	TIP	wet	82	0,170731707	chr10	19000868	MITE/Tourist	chr10	18998799	19000906	+	Epoxide hydrolase family protein. (Os10t0498200-01)
japonica	TIP_72461	Os12g0189400	OS12T0189400-01	0,032559555	-0,472712511	0,152962094	down	R1	TIP	wet	82	0,12195122	chr12	4504220	SINE/unknown	chr12	4506779	4507716	+	Similar to Photosystem I reaction centre subunit N, chloroplast precursor (PSI- N). (Os12t0189400-01)
japonica	TIP_61815	Os09g0518200	OS09T0518200-01	0,032600791	-0,433122325	0,152803277	down	R1	TIP	wet	82	0,926829268	chr09	20218770	DNAauto/MULE	chr09	20222176	20223992	+	UDP:glucose salicylic acid glucosyltransferase, Chemically-induced disease resistance (Os09t0518200-01)
japonica	TIP_62416	Os09g0565250	OS09T0565250-00	0,033763368	-0,28226585	0,151926405	down	R1	TIP	wet	82	0,817073171	chr09	22511091	DNAnona/MULE	chr09	22505286	22507503	+	Hypothetical gene. (Os09t0565250-00)
japonica	TIP_169	Os01g0116900	OS01T0116900-00	0,033763368	0,465968586	0,151732282	up	R1	TIP	wet	80	0,1875	chr01	937226	MITE/Tourist	chr01	924451	956639	+	Protein kinase, catalytic domain domain containing protein. (Os01t0116900-00)
japonica	TIP_6883	Os01g0726001	OS01T0726001-00	0,033763368	-0,330051977	0,151707795	down	R1	TIP	wet	82	0,304878049	chr01	30272700	LTR/Gypsy	chr01	30270960	30272787	+	Hypothetical gene. (Os01t0726001-00)
japonica	TIP_45961	Os06g0688200	OS06T0688200-00	0,033775137	-0,206150315	0,151570638	down	R1	TIP	wet	82	0,731707317	chr06	28706633	MITE/Stow	chr06	28707334	28708349	-	Similar to blight-associated protein p12. (Os06t0688200-00)
japonica	TIP_46951	Os07g0140633	OS07T0140633-00	0,034024438	0,243101023	0,151294275	up	R1	TIP	wet	82	0,073170732	chr07	2116361	LINE/unknown	chr07	2117854	2118368	-	Hypothetical gene. (Os07t0140633-00)
japonica	TIP_3257	Os01g0337900	OS01T0337900-01	0,034494681	-0,431926024	0,150891277	down	R1	TIP	wet	82	0,707317073	chr01	13270256	DNAnona/MULE	chr01	13272614	13282008	+	Similar to Dihydrolipoamide dehydrogenase. (Os01t0337900-01)
japonica	TIP_28586	Os04g0307500	OS04T0307500-01	0,037278894	-0,465884547	0,149083165	down	R1	TIP	wet	82	0,207317073	chr04	13862044	MITE/Stow	chr04	13863222	13868260	+	Similar to OSIGBa0113B06.2 protein. (Os04t0307500-01)
japonica	TIP_28587	Os04g0307500	OS04T0307500-01	0,037278894	-0,465884547	0,149083165	down	R1	TIP	wet	82	0,207317073	chr04	13862509	MITE/Stow	chr04	13863222	13868260	+	Similar to OSIGBa0113B06.2 protein. (Os04t0307500-01)
japonica	TIP_73851	Os12g0441700	OS12T0441700-01	0,038096064	0,574238257	0,148522531	up	R1	TIP	wet	82	0,682926829	chr12	14753357	MITE/Tourist	chr12	14754353	14757981	-	Conserved hypothetical protein. (Os12t0441700-01)
japonica	TIP_15160	Os02g0589000	OS02T0589000-01	0,038587861	1,007682761	0,148051016	up	R1	TIP	wet	81	0,938271605	chr02	22723752	DNAnona/Helitron	chr02	22722799	22733189	-	Lecithin:cholesterol acyltransferase family protein. (Os02t0589000-01)
japonica	TIP_65672	Os10g0484300	OS10T0484300-01	0,038587861	-0,453257528	0,148015086	down	R1	TIP	wet	82	0,62195122	chr10	18297546	MITE/Tourist	chr10	18297933	18300228	-	Pentatricopeptide repeat domain containing protein. (Os10t0484300-01)
japonica	TIP_14057	Os02g0516400	OS02T0516400-00	0,038729199	-0,436533216	0,147777942	down	R1	TIP	wet	82	0,865853659	chr02	18639615	DNAauto/Helitron	chr02	18639136	18641888	-	WW domain protein, Regulation of cuticle development (Os02t0516400-01)
japonica	TIP_45706	Os06g0670300	OS06T0670300-01	0,038729199	-0,668226152	0,147694376	down	R1	TIP	wet	82	0,951219512	chr06	27773527	LTR/Gypsy	chr06	27777556	27780675	+	MYB-like transcription factor, Regulation of plant height, Tolerance to cadmium stress (Os06t0670300-01)
japonica	TIP_9723	Os01g0954000	OS01T0954000-01	0,043520521	0,764766945	0,14523158	up	R1	TIP	wet	82	0,06097561	chr01	42023200	LTR/Copia	chr01	42018073	42019444	+	NADPH-dependent FMN reductase family protein. (Os01t0954000-01)
japonica	TIP_21470	Os03g0336500	OS03T0336500-01	0,046823107	-0,857821848	0,143639789	down	R1	TIP	wet	81	0,962962963	chr03	12483869	DNAnona/Helitron	chr03	12478017	12480135	+	Similar to Protein LRP16. (Os03t0336500-01)
japonica	TIP_6873	Os01g0725000	OS01T0725000-01	0,048312018	-0,533907054	0,142888786	down	R1	TIP	wet	82	0,317073171	chr01	30240509	DNAnona/hAT	chr01	30236130	30236776	+	Similar to H0402C08.3 protein. (Os01t0725000-01)
japonica	TIP_36323	Os05g0322900	OS05T0322900-02	0,04892647	-0,399789129	0,14251371	down	R1	TIP	wet	82	0,768292683	chr05	14992282	MITE/Tourist	chr05	14991579	14993673	+	WRKY transcription factor, Benzothiadiazole (BTH)-inducible blast resistance (Os05t0322900-01);Similar to WRKY transcription factor 45. (Os05t0322900-02);Similar to WRKY transcription factor 45. (Os05t0322900-03)
japonica	TIP_40526	Os06g0152550	OS06T0152550-01	0,049968085	0,470423095	0,141933193	up	R1	TIP	wet	80	0,775	chr06	2721158	LINE/unknown	chr06	2713853	2716174	+	Conserved hypothetical protein. (Os06t0152550-01)
japonica	TIP_59918	Os09g0382500	OS09T0382500-01	0,049968085	0,365540944	0,141850173	up	R1	TIP	wet	82	0,756097561	chr09	12983244	DNAnona/MULE	chr09	12977799	12980466	-	Conserved hypothetical protein. (Os09t0382500-01)
japonica	TIP_75781	Os12g0628100	OS12T0628100-01	6,28182E-13	-2,783724878	0,587526949	down	R2	TIP	wet	82	0,109756098	chr12	26892919	MITE/Tourist	chr12	26888810	26890166	-	Similar to Actin-depolymerizing factor 6 (ADF-6) (AtADF6). (Os12t0628100-01)
japonica	TIP_37375	Os05g0404400	OS05T0404400-02	6,28182E-13	1,005433389	0,583176498	up	R2	TIP	wet	82	0,341463415	chr05	19693132	MITE/Tourist	chr05	19691349	19694288	-	Similar to RPH1 (RESISTANCE TO PHYTOPHTHORA 1). (Os05t0404400-01);Similar to RPH1 (RESISTANCE TO PHYTOPHTHORA 1). (Os05t0404400-02)
japonica	TIP_66865	Os10g0569800	OS10T0569800-00	5,30022E-10	-2,106937637	0,502564477	down	R2	TIP	wet	82	0,451219512	chr10	22588030	DNAnona/hAT	chr10	22587847	22592131	+	Similar to RIR1b protein. (Os10t0569800-00)
japonica	TIP_21734	Os03g0355900	OS03T0355900-00	1,76544E-09	-0,948316943	0,48390642	down	R2	TIP	wet	82	0,182926829	chr03	13611291	LTR/Gypsy	chr03	13608897	13609145	-	Hypothetical conserved gene. (Os03t0355900-00)
japonica	TIP_75782	Os12g0628100	OS12T0628100-01	1,88094E-09	-2,815439266	0,480243428	down	R2	TIP	wet	82	0,085365854	chr12	26894533	MITE/Tourist	chr12	26888810	26890166	-	Similar to Actin-depolymerizing factor 6 (ADF-6) (AtADF6). (Os12t0628100-01)
japonica	TIP_66265	Os10g0528100	OS10T0528100-01	3,2089E-09	0,709066961	0,470935163	up	R2	TIP	wet	82	0,317073171	chr10	20554824	DNAnona/hAT	chr10	20551209	20552361	+	Similar to Glutathione S-transferase GST 42 (EC 2.5.1.18) (Fragment). (Os10t0528100-01)
japonica	TIP_58595	Os09g0251800	OS09T0251800-01	3,2089E-09	-1,271714881	0,468956855	down	R2	TIP	wet	82	0,158536585	chr09	3953012	LTR/Gypsy	chr09	3949859	3953247	+	C2 calcium-dependent membrane targeting domain containing protein. (Os09t0251800-01)
japonica	TIP_51333	Os07g0601000	OS07T0601000-01	4,72684E-09	-1,384059132	0,462090944	down	R2	TIP	wet	82	0,304878049	chr07	24518510	MITE/Stow	chr07	24515344	24517707	-	Similar to NADPH HC toxin reductase (Fragment). (Os07t0601000-01)
japonica	TIP_9851	Os01g0965400	OS01T0965400-01	7,31977E-09	1,39813465	0,454678741	up	R2	TIP	wet	82	0,158536585	chr01	42561773	DNAauto/MULE	chr01	42562823	42566993	+	Chloroplast-targeted UMP kinase, Regulation of leaf colour (Os01t0965400-01)
japonica	TIP_64159	Os10g0365800	OS10T0365800-01	9,56537E-08	-0,624494216	0,417544112	down	R2	TIP	wet	82	0,707317073	chr10	11414519	DNAnona/hAT	chr10	11414311	11417030	+	Protein of unknown function DUF3615 domain containing protein. (Os10t0365800-01)
japonica	TIP_52367	Os07g0684000	OS07T0684000-01	2,22586E-07	0,833054502	0,40293234	up	R2	TIP	wet	82	0,43902439	chr07	29010390	DNAnona/MULE	chr07	29008876	29009943	+	S-type euonymus-related lectin (EUL), Response to salt and drought stress, ABA treatment, Response to biotic treatment (Os07t0684000-01)
japonica	TIP_40867	Os06g0185900	OS06T0185900-01	2,22586E-07	-0,634285147	0,402653679	down	R2	TIP	wet	82	0,292682927	chr06	4322394	DNAnona/Helitron	chr06	4321654	4325071	+	Similar to Glutathione peroxidase. (Os06t0185900-01)
japonica	TIP_39336	Os05g0546300	OS05T0546300-01	1,09308E-06	0,916705501	0,37763412	up	R2	TIP	wet	82	0,585365854	chr05	27121709	MITE/Tourist	chr05	27119121	27120202	+	Hypothetical protein. (Os05t0546300-01)
japonica	TIP_66361	Os10g0536100	OS10T0536100-01	1,14266E-06	1,532170763	0,375823328	up	R2	TIP	wet	74	0,391891892	chr10	20863697	DNAauto/PILE	chr10	20863187	20873635	+	MIKC-type MADS-box protein, Long day (LD)-specific negative regulator of flowering (Os10t0536100-01)
japonica	TIP_543	Os01g0152700	OS01T0152700-01	2,38446E-06	0,874603793	0,363392416	up	R2	TIP	wet	82	0,597560976	chr01	2839521	LINE/unknown	chr01	2837892	2838171	-	Similar to Histone H2B (CaH2B). (Os01t0152700-01)
japonica	TIP_40866	Os06g0185900	OS06T0185900-01	2,62381E-06	-0,598501498	0,360889599	down	R2	TIP	wet	79	0,316455696	chr06	4320286	MITE/Tourist	chr06	4321654	4325071	+	Similar to Glutathione peroxidase. (Os06t0185900-01)
japonica	TIP_67871	Os11g0184900	OS11T0184900-02	1,12074E-05	0,822668096	0,336796088	up	R2	TIP	wet	82	0,658536585	chr11	4298264	MITE/Stow	chr11	4299277	4301784	-	Similar to OsNAC5 protein [imported]-rice. (Os11t0184900-01);NAC-type transcription factor, Regulation of stress-inducible genes, Stress tolerance (Os11t0184900-02)
japonica	TIP_73959	Os12g0448900	OS12T0448900-01	1,3213E-05	1,119394866	0,333192567	up	R2	TIP	wet	80	0,6375	chr12	15340177	MITE/Tourist	chr12	15330237	15340502	-	Fatty acid alpha-dioxygenase family, Enzyme that oxygenates fatty acids into 2R-hydroperoxides (Os12t0448900-01)
japonica	TIP_542	Os01g0152700	OS01T0152700-01	1,87114E-05	-0,833558115	0,32661406	down	R2	TIP	wet	82	0,390243902	chr01	2837603	SINE/unknown	chr01	2837892	2838171	-	Similar to Histone H2B (CaH2B). (Os01t0152700-01)
japonica	TIP_67875	Os11g0184900	OS11T0184900-02	2,47413E-05	0,790886632	0,321158193	up	R2	TIP	wet	82	0,634146341	chr11	4306497	MITE/Tourist	chr11	4299277	4301784	-	Similar to OsNAC5 protein [imported]-rice. (Os11t0184900-01);NAC-type transcription factor, Regulation of stress-inducible genes, Stress tolerance (Os11t0184900-02)
japonica	TIP_54626	Os08g0300501	OS08T0300501-00	6,33473E-05	-0,936535364	0,304594023	down	R2	TIP	wet	82	0,329268293	chr08	12369848	DNAauto/hAT	chr08	12370079	12372150	+	Conserved hypothetical protein. (Os08t0300501-00)
japonica	TIP_30793	Os04g0494300	OS04T0494300-00	9,70709E-05	-0,619299334	0,296535139	down	R2	TIP	wet	81	0,938271605	chr04	24712398	DNAauto/MULE	chr04	24712259	24717577	+	Hypothetical gene. (Os04t0494300-00)
japonica	TIP_64322	Os10g0378100	OS10T0378100-01	0,000100772	-1,215533138	0,295132569	down	R2	TIP	wet	81	0,197530864	chr10	12094053	DNAauto/CACTA	chr10	12090264	12098560	-	Similar to Cytochrome P450 family protein, expressed. (Os10t0378100-01)
japonica	TIP_47253	Os07g0164300	OS07T0164300-01	0,000131053	1,006761109	0,289712325	up	R2	TIP	wet	82	0,890243902	chr07	3450876	DNAnona/MULE	chr07	3446343	3450330	-	Qa-SNARE (soluble N-ethylmaleimide sensitive factor attachment protein receptor), t-SNARE, Seed embryogenesis, Seed fertility (Os07t0164300-01)
japonica	TIP_39690	Os05g0574400	OS05T0574400-01	0,000131053	1,363894212	0,289174781	up	R2	TIP	wet	82	0,93902439	chr05	28617551	MITE/Tourist	chr05	28617700	28621468	-	Similar to Malate dehydrogenase. (Os05t0574400-01)
japonica	TIP_49425	Os07g0452500	OS07T0452500-02	0,000255888	-1,584360318	0,276839064	down	R2	TIP	wet	82	0,048780488	chr07	15604886	DNAauto/MULE	chr07	15602028	15604564	-	Similar to ORMDL family protein. (Os07t0452500-01);ORMDL family protein. (Os07t0452500-02)
japonica	TIP_8592	Os01g0869800	OS01T0869800-01	0,000389949	0,638346583	0,268742915	up	R2	TIP	wet	82	0,951219512	chr01	37695386	DNAauto/MULE	chr01	37697024	37699582	+	22-kDa Photosystem II protein, Photoprotection (Os01t0869800-01)
japonica	TIP_67873	Os11g0184900	OS11T0184900-02	0,000407941	-0,754320856	0,266865869	down	R2	TIP	wet	82	0,304878049	chr11	4305229	DNAnona/MULE	chr11	4299277	4301784	-	Similar to OsNAC5 protein [imported]-rice. (Os11t0184900-01);NAC-type transcription factor, Regulation of stress-inducible genes, Stress tolerance (Os11t0184900-02)
japonica	TIP_46171	Os06g0702700	OS06T0702700-01	0,000407941	0,559518124	0,266674098	up	R2	TIP	wet	81	0,395061728	chr06	29670067	DNAnona/MULE	chr06	29665362	29667372	-	Butirosin biosynthesis, BtrG-like domain containing protein. (Os06t0702700-01)
japonica	TIP_53491	Os08g0174100	OS08T0174100-00	0,000564884	0,485923746	0,260262494	up	R2	TIP	wet	82	0,536585366	chr08	4313658	MITE/Stow	chr08	4316104	4318545	-	Similar to transferase family protein. (Os08t0174100-00)
japonica	TIP_53493	Os08g0174100	OS08T0174100-00	0,000766042	-0,484154223	0,25419817	down	R2	TIP	wet	82	0,426829268	chr08	4318661	LTR/Copia	chr08	4316104	4318545	-	Similar to transferase family protein. (Os08t0174100-00)
japonica	TIP_745	Os01g0175600	OS01T0175600-01	0,001024209	0,688777477	0,248366642	up	R2	TIP	wet	82	0,292682927	chr01	3881647	DNAnona/hAT	chr01	3878164	3884017	-	Boron (B) transporter (Os01t0175600-01)
japonica	TIP_58637	Os09g0256100	OS09T0256100-00	0,001193632	0,436661605	0,245021123	up	R2	TIP	wet	82	0,146341463	chr09	4250407	LTR/TRIM	chr09	4250749	4251832	+	Similar to flavonol 4-sulfotransferase. (Os09t0256100-00)
japonica	TIP_51880	Os07g0643400	OS07T0643400-01	0,001808255	-0,591346106	0,236758385	down	R2	TIP	wet	82	0,280487805	chr07	26786932	LTR/unknown	chr07	26790870	26792040	-	Alpha/beta hydrolase fold-3 domain containing protein. (Os07t0643400-01)
japonica	TIP_40181	Os06g0124900	OS06T0124900-01	0,001808255	-0,44675223	0,236332535	down	R2	TIP	wet	82	0,463414634	chr06	1343058	DNAnona/hAT	chr06	1341610	1344490	+	Conserved hypothetical protein. (Os06t0124900-01)
japonica	TIP_54005	Os08g0237200	OS08T0237200-01	0,002098843	0,530668853	0,233063845	up	R2	TIP	wet	81	0,654320988	chr08	8350007	LTR/Gypsy	chr08	8342253	8346555	-	Mannose-1-phosphate guanyl transferase, GDP-mannose pyrophosphorylase (GMPase) homolog (Os08t0237200-01)
japonica	TIP_65945	Os10g0505700	OS10T0505700-01	0,002542636	-0,79739461	0,228673321	down	R2	TIP	wet	79	0,556962025	chr10	19334987	MITE/Tourist	chr10	19335093	19335615	-	Similar to Nonspecific lipid-transfer protein 2 (nsLTP2) (7 kDa lipid transfer protein). (Os10t0505700-01)
japonica	TIP_44404	Os06g0581300	OS06T0581300-01	0,002542636	-0,862209358	0,22850832	down	R2	TIP	wet	82	0,841463415	chr06	22700337	MITE/Tourist	chr06	22699043	22704976	+	Hypothetical conserved gene. (Os06t0581300-01);Protein of unknown function DUF1475 family protein. (Os06t0581300-02)
japonica	TIP_40855	Os06g0184800	OS06T0184800-01	0,002583278	-0,590378402	0,227730978	down	R2	TIP	wet	82	0,682926829	chr06	4260021	MITE/Stow	chr06	4264424	4265115	-	Similar to Low-temperature induced protein lt101.1 (Blt101) (Blt101.1). (Os06t0184800-01)
japonica	TIP_46431	Os06g0729150	OS06T0729150-00	0,002940145	-0,442072661	0,224850275	down	R2	TIP	wet	82	0,914634146	chr06	31049092	MITE/Tourist	chr06	31052625	31055269	+	Hypothetical protein. (Os06t0729150-00)
japonica	TIP_70995	Os11g0620000	OS11T0620000-01	0,0042371	-0,479235157	0,217546589	down	R2	TIP	wet	82	0,634146341	chr11	24169852	DNAnona/MULE	chr11	24166430	24169621	-	Peptidase S26A, signal peptidase I family protein. (Os11t0620000-01)
japonica	TIP_72767	Os12g0230100	OS12T0230100-01	0,004730067	0,804369845	0,215021663	up	R2	TIP	wet	82	0,097560976	chr12	7102943	LTR/Gypsy	chr12	7095860	7101608	-	Similar to ATP-dependent Clp protease ATP-binding subunit clpA homolog, chloroplast precursor (Fragment). (Os12t0230100-01)
japonica	TIP_59978	Os09g0391501	OS09T0391501-00	0,005842861	0,668462072	0,210586166	up	R2	TIP	wet	82	0,256097561	chr09	13533197	MITE/Tourist	chr09	13533833	13534255	+	Hypothetical gene. (Os09t0391501-00)
japonica	TIP_58639	Os09g0256100	OS09T0256100-00	0,011197753	-0,368488302	0,197750954	down	R2	TIP	wet	82	0,829268293	chr09	4253519	MITE/Stow	chr09	4250749	4251832	+	Similar to flavonol 4-sulfotransferase. (Os09t0256100-00)
japonica	TIP_9312	Os01g0923600	OS01T0923600-02	0,011851712	-0,745532444	0,195853926	down	R2	TIP	wet	82	0,963414634	chr01	40395062	LINE/unknown	chr01	40397315	40403249	+	Hypothetical conserved gene. (Os01t0923600-01);Ankyrin domain containing protein. (Os01t0923600-02);Hypothetical conserved gene. (Os01t0923600-03)
japonica	TIP_54128	Os08g0249000	OS08T0249000-01	0,011851712	-0,560139022	0,195807686	down	R2	TIP	wet	82	0,231707317	chr08	9098180	DNAnona/MULE	chr08	9098485	9099878	+	Zinc finger, B-box domain containing protein. (Os08t0249000-01)
japonica	TIP_46706	Os07g0114500	OS07T0114500-01	0,012430029	-0,409557011	0,194477872	down	R2	TIP	wet	82	0,914634146	chr07	817005	DNAnona/MULE	chr07	809697	812515	+	Conserved hypothetical protein. (Os07t0114500-01)
japonica	TIP_40146	Os06g0115300	OS06T0115300-01	0,01346425	0,547182046	0,192532876	up	R2	TIP	wet	82	0,426829268	chr06	862944	MITE/Stow	chr06	860908	862566	-	Acyl-CoA-binding protein , Stress response (Os06t0115300-01)
japonica	TIP_32057	Os04g0585700	OS04T0585700-01	0,016017118	-0,569818066	0,188452691	down	R2	TIP	wet	81	0,75308642	chr04	29594995	LTR/Copia	chr04	29588252	29590515	-	Protein of unknown function DUF581 family protein. (Os04t0585700-01)
japonica	TIP_32055	Os04g0585700	OS04T0585700-01	0,016017118	-0,588990966	0,187806664	down	R2	TIP	wet	82	0,780487805	chr04	29592939	MITE/Tourist	chr04	29588252	29590515	-	Protein of unknown function DUF581 family protein. (Os04t0585700-01)
japonica	TIP_38281	Os05g0467300	OS05T0467300-01	0,016017118	-1,19177004	0,187731267	down	R2	TIP	wet	82	0,036585366	chr05	22935653	MITE/Stow	chr05	22932713	22935696	+	SelT/selW/selH selenoprotein family protein. (Os05t0467300-01)
japonica	TIP_12831	Os02g0320300	OS02T0320300-01	0,016017118	0,88208027	0,187630652	up	R2	TIP	wet	82	0,073170732	chr02	12766312	LTR/Gypsy	chr02	12765282	12772010	+	Similar to Chalcone isomerase 3. (Os02t0320300-01)
japonica	TIP_39455	Os05g0556400	OS05T0556400-01	0,016374704	-0,729056999	0,186597711	down	R2	TIP	wet	80	0,95	chr05	27671315	MITE/Tourist	chr05	27666328	27669347	+	DOMON related domain containing protein. (Os05t0556400-01)
japonica	TIP_19536	Os03g0195450	OS03T0195450-00	0,016374704	0,754642866	0,18647123	up	R2	TIP	wet	82	0,134146341	chr03	4951149	DNAnona/Helitron	chr03	4954143	4954913	-	Similar to sulfate/bicarbonate/oxalate exchanger and transporter sat-1. (Os03t0195450-00)
japonica	TIP_27094	Os03g0850600	OS03T0850600-01	0,018123436	0,450990327	0,184145126	up	R2	TIP	wet	82	0,195121951	chr03	35813040	DNAnona/PILE	chr03	35806060	35808891	-	Similar to Integral membrane protein. (Os03t0850600-01)
japonica	TIP_72683	Os12g0210300	OS12T0210300-01	0,018366022	-0,693967399	0,183536349	down	R2	TIP	wet	82	0,817073171	chr12	5756511	DNAnona/MULE	chr12	5760537	5763699	+	Zeta class glutathione transferase, Cold tolerance (Os12t0210300-01)
japonica	TIP_39745	Os05g0578500	OS05T0578500-01	0,019833938	-0,487510594	0,181695338	down	R2	TIP	wet	82	0,93902439	chr05	28795366	DNAnona/MULE	chr05	28795466	28801237	+	NAD(P)-binding domain containing protein. (Os05t0578500-01)
japonica	TIP_11580	Os02g0223700	OS02T0223700-01	0,020116439	0,438273289	0,181039567	up	R2	TIP	wet	82	0,609756098	chr02	6920508	MITE/Tourist	chr02	6915418	6916621	+	Protein of unknown function DUF3511 domain containing protein. (Os02t0223700-01)
japonica	TIP_34204	Os05g0161500	OS05T0161500-01	0,020116439	-0,716867894	0,180747664	down	R2	TIP	wet	82	0,170731707	chr05	3628628	DNAnona/hAT	chr05	3626394	3629080	+	Calcium-activated (p)ppGpp synthetase, Ca<sup>2+</sup>-activated RelA-SpoT homolog 2 (Os05t0161500-01)
japonica	TIP_697	Os01g0170900	OS01T0170900-01	0,021194051	-0,525659383	0,179401772	down	R2	TIP	wet	82	0,951219512	chr01	3665958	SINE/unknown	chr01	3665042	3666044	-	Conserved hypothetical protein. (Os01t0170900-01)
japonica	TIP_28709	Os04g0338100	OS04T0338100-01	0,026598633	-0,785329764	0,174634949	down	R2	TIP	wet	82	0,780487805	chr04	15927749	LTR/Copia	chr04	15924375	15928109	+	Similar to IN2-2 protein. (Os04t0338100-01)
japonica	TIP_53500	Os08g0174700	OS08T0174700-01	0,027345805	0,473720929	0,173772717	up	R2	TIP	wet	82	0,243902439	chr08	4339693	LTR/Gypsy	chr08	4344171	4350465	+	A member of the somatic embryogenesis receptor kinases (SERKs) family, Brassinosteroid (BR) signaling, Regulation of plant architecture (Os08t0174700-01)
japonica	TIP_57087	Os08g0504400	OS08T0504400-02	0,027753689	-0,381149761	0,173168146	down	R2	TIP	wet	82	0,951219512	chr08	24936658	MITE/Stow	chr08	24929625	24934781	-	Similar to uncharacterized enzyme involved in pigment biosynthesis. (Os08t0504400-01);Similar to Uncharacterized enzyme involved in pigment biosynthesis. (Os08t0504400-02)
japonica	TIP_60961	Os09g0453500	OS09T0453500-01	0,02840437	0,408228475	0,172188306	up	R2	TIP	wet	82	0,329268293	chr09	17015862	LTR/Copia	chr09	17008779	17014354	-	Spectrin repeat containing protein. (Os09t0453500-01)
japonica	TIP_40647	Os06g0163200	OS06T0163200-01	0,02840437	-0,977746403	0,172099223	down	R2	TIP	wet	82	0,048780488	chr06	3195114	DNAnona/Helitron	chr06	3186510	3191315	+	Esterase/lipase/thioesterase domain containing protein. (Os06t0163200-01)
japonica	TIP_6873	Os01g0725000	OS01T0725000-01	0,028703858	-0,613971715	0,171593033	down	R2	TIP	wet	82	0,317073171	chr01	30240509	DNAnona/hAT	chr01	30236130	30236776	+	Similar to H0402C08.3 protein. (Os01t0725000-01)
japonica	TIP_56748	Os08g0480100	OS08T0480100-01	0,031616705	-0,552269243	0,169395317	down	R2	TIP	wet	82	0,926829268	chr08	23718503	MITE/Stow	chr08	23717763	23722249	-	Signal recognition particle receptor, alpha subunit, N-terminal domain containing protein. (Os08t0480100-01);Similar to predicted protein. (Os08t0480100-02)
japonica	TIP_62634	Os10g0112700	OS10T0112700-01	0,033263666	-0,362869787	0,168102669	down	R2	TIP	wet	82	0,731707317	chr10	852100	SINE/unknown	chr10	848170	850210	-	Serine/threonine protein kinase-related domain containing protein. (Os10t0112700-01)
japonica	TIP_7833	Os01g0808100	OS01T0808100-01	0,033440185	-0,588892641	0,167710395	down	R2	TIP	wet	82	0,963414634	chr01	34318089	DNAnona/unknown	chr01	34306514	34313319	-	Similar to BZIP transcription factor. (Os01t0808100-01);TGA transcription factor, bZIP transcription factor, Resistance against bacterial blight disease (Os01t0808100-02)
japonica	TIP_24918	Os03g0686100	OS03T0686100-01	0,033511446	-0,463667774	0,167016823	down	R2	TIP	wet	82	0,93902439	chr03	27373768	DNAnona/Helitron	chr03	27371197	27372872	-	Conserved hypothetical protein. (Os03t0686100-01)
japonica	TIP_73851	Os12g0441700	OS12T0441700-01	0,033511446	0,506012297	0,167003747	up	R2	TIP	wet	82	0,682926829	chr12	14753357	MITE/Tourist	chr12	14754353	14757981	-	Conserved hypothetical protein. (Os12t0441700-01)
japonica	TIP_49092	Os07g0412100	OS07T0412100-01	0,033511446	-0,383551105	0,166828623	down	R2	TIP	wet	82	0,402439024	chr07	12928495	MITE/Tourist	chr07	12916883	12924202	-	Similar to Granule-bound starch synthase Ib, chloroplast precursor (EC 2.4.1.21) (Fragment). (Os07t0412100-01);Granule-bound starch synthase 2, Starch biosynthesis (Os07t0412100-02)
japonica	TIP_34153	Os05g0158500	OS05T0158500-01	0,036456097	-0,527247459	0,164892307	down	R2	TIP	wet	82	0,93902439	chr05	3447403	MITE/Tourist	chr05	3439304	3443769	-	Serine carboxypeptidase, Positive regulator of grain size (Os05t0158500-01)
japonica	TIP_1657	Os01g0227400	OS01T0227400-01	0,038012239	0,557698551	0,163796357	up	R2	TIP	wet	82	0,768292683	chr01	7049698	MITE/Stow	chr01	7049941	7050874	+	Similar to Cytochrome P450 71A1 (EC 1.14.-.-) (CYPLXXIA1) (ARP-2). (Os01t0227400-01)
japonica	TIP_67392	Os11g0150800	OS11T0150800-01	0,039287699	0,486426213	0,162434989	up	R2	TIP	wet	82	0,792682927	chr11	2363757	DNAnona/MULEtir	chr11	2363882	2364482	+	Hypothetical protein. (Os11t0150800-01)
japonica	TIP_30360	Os04g0460300	OS04T0460300-01	0,039287699	-0,885135319	0,16237106	down	R2	TIP	wet	82	0,963414634	chr04	22982978	DNAauto/Helitron	chr04	22977821	22980329	+	Amino acid transporter, transmembrane domain containing protein. (Os04t0460300-01)
japonica	TIP_43753	Os06g0529800	OS06T0529800-01	0,039287699	0,531218088	0,162355909	up	R2	TIP	wet	82	0,792682927	chr06	19670885	MITE/Tourist	chr06	19663227	19669542	+	Zinc finger, PHD-type domain containing protein. (Os06t0529800-01)
japonica	TIP_41603	Os06g0239200	OS06T0239200-00	0,039749394	0,697544986	0,161868662	up	R2	TIP	wet	81	0,802469136	chr06	7230724	DNAnona/MULE	chr06	7230221	7230662	+	Conserved hypothetical protein. (Os06t0239200-00)
japonica	TIP_41037	Os06g0202300	OS06T0202300-01	0,040345777	-0,572076269	0,161320843	down	R2	TIP	wet	82	0,353658537	chr06	5158333	MITE/Tourist	chr06	5158231	5165171	+	Conserved hypothetical protein. (Os06t0202300-01)
japonica	TIP_48581	Os07g0258800	OS07T0258800-00	0,0451662	-0,297450004	0,158813366	down	R2	TIP	wet	82	0,914634146	chr07	8991333	LINE/unknown	chr07	8993952	8997189	-	Conserved hypothetical protein. (Os07t0258800-00)
japonica	TIP_20764	Os03g0285100	OS03T0285100-01	0,0451662	0,474589491	0,15858385	up	R2	TIP	wet	82	0,914634146	chr03	9827108	MITE/Tourist	chr03	9822842	9826639	+	Conserved hypothetical protein. (Os03t0285100-01)
japonica	TIP_75781	Os12g0628100	OS12T0628100-01	4,67938E-27	-2,662771814	0,817610436	down	R3	TIP	wet	82	0,109756098	chr12	26892919	MITE/Tourist	chr12	26888810	26890166	-	Similar to Actin-depolymerizing factor 6 (ADF-6) (AtADF6). (Os12t0628100-01)
japonica	TIP_66361	Os10g0536100	OS10T0536100-01	1,70372E-18	1,74138042	0,696809462	up	R3	TIP	wet	74	0,391891892	chr10	20863697	DNAauto/PILE	chr10	20863187	20873635	+	MIKC-type MADS-box protein, Long day (LD)-specific negative regulator of flowering (Os10t0536100-01)
japonica	TIP_21734	Os03g0355900	OS03T0355900-00	4,7411E-18	-1,206057005	0,685842973	down	R3	TIP	wet	82	0,182926829	chr03	13611291	LTR/Gypsy	chr03	13608897	13609145	-	Hypothetical conserved gene. (Os03t0355900-00)
japonica	TIP_66865	Os10g0569800	OS10T0569800-00	1,61039E-16	-2,30096377	0,654615745	down	R3	TIP	wet	82	0,451219512	chr10	22588030	DNAnona/hAT	chr10	22587847	22592131	+	Similar to RIR1b protein. (Os10t0569800-00)
japonica	TIP_73959	Os12g0448900	OS12T0448900-01	1,17892E-15	1,832220585	0,635094195	up	R3	TIP	wet	80	0,6375	chr12	15340177	MITE/Tourist	chr12	15330237	15340502	-	Fatty acid alpha-dioxygenase family, Enzyme that oxygenates fatty acids into 2R-hydroperoxides (Os12t0448900-01)
japonica	TIP_51333	Os07g0601000	OS07T0601000-01	2,9165E-15	-1,823083382	0,625103071	down	R3	TIP	wet	82	0,304878049	chr07	24518510	MITE/Stow	chr07	24515344	24517707	-	Similar to NADPH HC toxin reductase (Fragment). (Os07t0601000-01)
japonica	TIP_52367	Os07g0684000	OS07T0684000-01	1,8449E-14	1,295442163	0,606040455	up	R3	TIP	wet	82	0,43902439	chr07	29010390	DNAnona/MULE	chr07	29008876	29009943	+	S-type euonymus-related lectin (EUL), Response to salt and drought stress, ABA treatment, Response to biotic treatment (Os07t0684000-01)
japonica	TIP_75782	Os12g0628100	OS12T0628100-01	2,05781E-13	-2,509678177	0,580374772	down	R3	TIP	wet	82	0,085365854	chr12	26894533	MITE/Tourist	chr12	26888810	26890166	-	Similar to Actin-depolymerizing factor 6 (ADF-6) (AtADF6). (Os12t0628100-01)
japonica	TIP_9851	Os01g0965400	OS01T0965400-01	4,86671E-13	1,360766808	0,570074784	up	R3	TIP	wet	82	0,158536585	chr01	42561773	DNAauto/MULE	chr01	42562823	42566993	+	Chloroplast-targeted UMP kinase, Regulation of leaf colour (Os01t0965400-01)
japonica	TIP_745	Os01g0175600	OS01T0175600-01	4,46689E-11	1,225812205	0,517932722	up	R3	TIP	wet	82	0,292682927	chr01	3881647	DNAnona/hAT	chr01	3878164	3884017	-	Boron (B) transporter (Os01t0175600-01)
japonica	TIP_37375	Os05g0404400	OS05T0404400-02	7,04538E-11	0,918202963	0,511321372	up	R3	TIP	wet	82	0,341463415	chr05	19693132	MITE/Tourist	chr05	19691349	19694288	-	Similar to RPH1 (RESISTANCE TO PHYTOPHTHORA 1). (Os05t0404400-01);Similar to RPH1 (RESISTANCE TO PHYTOPHTHORA 1). (Os05t0404400-02)
japonica	TIP_64159	Os10g0365800	OS10T0365800-01	7,68555E-11	-0,6539237	0,509215396	down	R3	TIP	wet	82	0,707317073	chr10	11414519	DNAnona/hAT	chr10	11414311	11417030	+	Protein of unknown function DUF3615 domain containing protein. (Os10t0365800-01)
japonica	TIP_54005	Os08g0237200	OS08T0237200-01	1,24063E-10	1,003846498	0,502389852	up	R3	TIP	wet	81	0,654320988	chr08	8350007	LTR/Gypsy	chr08	8342253	8346555	-	Mannose-1-phosphate guanyl transferase, GDP-mannose pyrophosphorylase (GMPase) homolog (Os08t0237200-01)
japonica	TIP_30793	Os04g0494300	OS04T0494300-00	2,39794E-10	-0,95445656	0,493296139	down	R3	TIP	wet	81	0,938271605	chr04	24712398	DNAauto/MULE	chr04	24712259	24717577	+	Hypothetical gene. (Os04t0494300-00)
japonica	TIP_543	Os01g0152700	OS01T0152700-01	7,69802E-10	0,956582578	0,477604279	up	R3	TIP	wet	82	0,597560976	chr01	2839521	LINE/unknown	chr01	2837892	2838171	-	Similar to Histone H2B (CaH2B). (Os01t0152700-01)
japonica	TIP_542	Os01g0152700	OS01T0152700-01	7,79112E-10	-0,960655881	0,476616342	down	R3	TIP	wet	82	0,390243902	chr01	2837603	SINE/unknown	chr01	2837892	2838171	-	Similar to Histone H2B (CaH2B). (Os01t0152700-01)
japonica	TIP_64322	Os10g0378100	OS10T0378100-01	3,55773E-09	-1,608354523	0,455826403	down	R3	TIP	wet	81	0,197530864	chr10	12094053	DNAauto/CACTA	chr10	12090264	12098560	-	Similar to Cytochrome P450 family protein, expressed. (Os10t0378100-01)
japonica	TIP_54626	Os08g0300501	OS08T0300501-00	3,17074E-08	-1,111710214	0,424896494	down	R3	TIP	wet	82	0,329268293	chr08	12369848	DNAauto/hAT	chr08	12370079	12372150	+	Conserved hypothetical protein. (Os08t0300501-00)
japonica	TIP_40866	Os06g0185900	OS06T0185900-01	7,24807E-08	-0,799186985	0,412300904	down	R3	TIP	wet	79	0,316455696	chr06	4320286	MITE/Tourist	chr06	4321654	4325071	+	Similar to Glutathione peroxidase. (Os06t0185900-01)
japonica	TIP_65945	Os10g0505700	OS10T0505700-01	4,23896E-07	-1,002223827	0,385469937	down	R3	TIP	wet	79	0,556962025	chr10	19334987	MITE/Tourist	chr10	19335093	19335615	-	Similar to Nonspecific lipid-transfer protein 2 (nsLTP2) (7 kDa lipid transfer protein). (Os10t0505700-01)
japonica	TIP_40867	Os06g0185900	OS06T0185900-01	6,72704E-07	-0,767483491	0,377723733	down	R3	TIP	wet	82	0,292682927	chr06	4322394	DNAnona/Helitron	chr06	4321654	4325071	+	Similar to Glutathione peroxidase. (Os06t0185900-01)
japonica	TIP_39336	Os05g0546300	OS05T0546300-01	9,50932E-07	0,884270128	0,371703811	up	R3	TIP	wet	82	0,585365854	chr05	27121709	MITE/Tourist	chr05	27119121	27120202	+	Hypothetical protein. (Os05t0546300-01)
japonica	TIP_12831	Os02g0320300	OS02T0320300-01	1,1121E-06	1,214339726	0,368600681	up	R3	TIP	wet	82	0,073170732	chr02	12766312	LTR/Gypsy	chr02	12765282	12772010	+	Similar to Chalcone isomerase 3. (Os02t0320300-01)
japonica	TIP_744	Os01g0175600	OS01T0175600-01	1,2323E-06	1,11382781	0,366350232	up	R3	TIP	wet	81	0,234567901	chr01	3875827	DNAnona/MULE	chr01	3878164	3884017	-	Boron (B) transporter (Os01t0175600-01)
japonica	TIP_41603	Os06g0239200	OS06T0239200-00	1,36977E-06	1,049892152	0,363535958	up	R3	TIP	wet	81	0,802469136	chr06	7230724	DNAnona/MULE	chr06	7230221	7230662	+	Conserved hypothetical protein. (Os06t0239200-00)
japonica	TIP_59978	Os09g0391501	OS09T0391501-00	1,36977E-06	0,83564757	0,363459229	up	R3	TIP	wet	82	0,256097561	chr09	13533197	MITE/Tourist	chr09	13533833	13534255	+	Hypothetical gene. (Os09t0391501-00)
japonica	TIP_27404	Os04g0121100	OS04T0121100-01	1,56774E-06	0,870753829	0,360671381	up	R3	TIP	wet	81	0,320987654	chr04	1249238	MITE/Tourist	chr04	1248450	1260282	+	Similar to OSIGBa0115D20.4 protein. (Os04t0121100-01)
japonica	TIP_53491	Os08g0174100	OS08T0174100-00	1,56774E-06	0,668040093	0,3601908	up	R3	TIP	wet	82	0,536585366	chr08	4313658	MITE/Stow	chr08	4316104	4318545	-	Similar to transferase family protein. (Os08t0174100-00)
japonica	TIP_53493	Os08g0174100	OS08T0174100-00	4,02563E-06	-0,658848995	0,344690224	down	R3	TIP	wet	82	0,426829268	chr08	4318661	LTR/Copia	chr08	4316104	4318545	-	Similar to transferase family protein. (Os08t0174100-00)
japonica	TIP_67871	Os11g0184900	OS11T0184900-02	1,4834E-05	0,737011246	0,322913268	up	R3	TIP	wet	82	0,658536585	chr11	4298264	MITE/Stow	chr11	4299277	4301784	-	Similar to OsNAC5 protein [imported]-rice. (Os11t0184900-01);NAC-type transcription factor, Regulation of stress-inducible genes, Stress tolerance (Os11t0184900-02)
japonica	TIP_63931	Os10g0343100	OS10T0343100-01	3,35984E-05	-0,771360796	0,308726756	down	R3	TIP	wet	82	0,207317073	chr10	10174319	MITE/Tourist	chr10	10170579	10174444	+	Syntaxin 6, N-terminal domain containing protein. (Os10t0343100-01)
japonica	TIP_67875	Os11g0184900	OS11T0184900-02	3,53988E-05	0,707838429	0,30731145	up	R3	TIP	wet	82	0,634146341	chr11	4306497	MITE/Tourist	chr11	4299277	4301784	-	Similar to OsNAC5 protein [imported]-rice. (Os11t0184900-01);NAC-type transcription factor, Regulation of stress-inducible genes, Stress tolerance (Os11t0184900-02)
japonica	TIP_73620	Os12g0420400	OS12T0420400-02	5,32247E-05	0,663843566	0,299873246	up	R3	TIP	wet	82	0,707317073	chr12	13118783	DNAnona/Tourist	chr12	13115340	13117325	+	Similar to Photosystem I reaction center subunit XI, chloroplast precursor (PSI- L) (PSI subunit V). (Os12t0420400-01);Similar to Photosystem I reaction center subunit XI, chloroplast precursor (PSI- L) (PSI subunit V). (Os12t0420400-02);Similar to Photosystem I reaction center subunit XI, chloroplastic. (Os12t0420400-03)
japonica	TIP_39690	Os05g0574400	OS05T0574400-01	6,89978E-05	1,610790306	0,294925393	up	R3	TIP	wet	82	0,93902439	chr05	28617551	MITE/Tourist	chr05	28617700	28621468	-	Similar to Malate dehydrogenase. (Os05t0574400-01)
japonica	TIP_41601	Os06g0239200	OS06T0239200-00	9,45897E-05	-0,985669217	0,288994702	down	R3	TIP	wet	81	0,172839506	chr06	7226860	DNAnona/Helitron	chr06	7230221	7230662	+	Conserved hypothetical protein. (Os06t0239200-00)
japonica	TIP_67873	Os11g0184900	OS11T0184900-02	0,000104051	-0,715216186	0,286599483	down	R3	TIP	wet	82	0,304878049	chr11	4305229	DNAnona/MULE	chr11	4299277	4301784	-	Similar to OsNAC5 protein [imported]-rice. (Os11t0184900-01);NAC-type transcription factor, Regulation of stress-inducible genes, Stress tolerance (Os11t0184900-02)
japonica	TIP_32055	Os04g0585700	OS04T0585700-01	0,000104051	-0,680366746	0,286382341	down	R3	TIP	wet	82	0,780487805	chr04	29592939	MITE/Tourist	chr04	29588252	29590515	-	Protein of unknown function DUF581 family protein. (Os04t0585700-01)
japonica	TIP_40552	Os06g0154400	OS06T0154400-01	0,000217652	0,686774111	0,273010282	up	R3	TIP	wet	82	0,695121951	chr06	2802746	DNAnona/unknown	chr06	2803042	2806247	+	Domain of unknown function DUF676, lipase-like domain containing protein. (Os06t0154400-01)
japonica	TIP_32057	Os04g0585700	OS04T0585700-01	0,000257254	-0,637543297	0,269597357	down	R3	TIP	wet	81	0,75308642	chr04	29594995	LTR/Copia	chr04	29588252	29590515	-	Protein of unknown function DUF581 family protein. (Os04t0585700-01)
japonica	TIP_26765	Os03g0819600	OS03T0819600-01	0,000342036	-0,504882287	0,264086572	down	R3	TIP	wet	79	0,898734177	chr03	34391022	MITE/Tourist	chr03	34394508	34395638	-	Chalcone isomerase (EC 5.5.1.6), Flavonoid biosynthesis (Os03t0819600-01);Chalcone isomerase (EC 5.5.1.6). (Os03t0819600-02)
japonica	TIP_40181	Os06g0124900	OS06T0124900-01	0,000385807	-0,598129891	0,261495674	down	R3	TIP	wet	82	0,463414634	chr06	1343058	DNAnona/hAT	chr06	1341610	1344490	+	Conserved hypothetical protein. (Os06t0124900-01)
japonica	TIP_72767	Os12g0230100	OS12T0230100-01	0,000511983	0,976572978	0,255986809	up	R3	TIP	wet	82	0,097560976	chr12	7102943	LTR/Gypsy	chr12	7095860	7101608	-	Similar to ATP-dependent Clp protease ATP-binding subunit clpA homolog, chloroplast precursor (Fragment). (Os12t0230100-01)
japonica	TIP_41037	Os06g0202300	OS06T0202300-01	0,00060427	-0,734519082	0,252573256	down	R3	TIP	wet	82	0,353658537	chr06	5158333	MITE/Tourist	chr06	5158231	5165171	+	Conserved hypothetical protein. (Os06t0202300-01)
japonica	TIP_62522	Os10g0101100	OS10T0101100-01	0,000840832	-0,731669172	0,246163182	down	R3	TIP	wet	82	0,207317073	chr10	97431	MITE/Stow	chr10	100437	103373	-	Peptidase S10, serine carboxypeptidase family protein. (Os10t0101100-01)
japonica	TIP_15111	Os02g0584800	OS02T0584800-01	0,00097883	-1,006204033	0,242981199	down	R3	TIP	wet	82	0,865853659	chr02	22558673	MITE/Stow	chr02	22553380	22554242	-	Heavy metal transport/detoxification protein domain containing protein. (Os02t0584800-01)
japonica	TIP_58595	Os09g0251800	OS09T0251800-01	0,000996146	-0,856885643	0,242258775	down	R3	TIP	wet	82	0,158536585	chr09	3953012	LTR/Gypsy	chr09	3949859	3953247	+	C2 calcium-dependent membrane targeting domain containing protein. (Os09t0251800-01)
japonica	TIP_75535	Os12g0612400	OS12T0612400-01	0,00257704	-0,706747408	0,224300904	down	R3	TIP	wet	82	0,963414634	chr12	25911126	MITE/Stow	chr12	25901495	25907550	-	Similar to S-locus protein 5 (Fragment). (Os12t0612400-01);Similar to YUP8H12R.35 protein. (Os12t0612400-02)
japonica	TIP_1553	Os01g0223000	OS01T0223000-01	0,003263328	0,448249995	0,219489955	up	R3	TIP	wet	81	0,271604938	chr01	6715406	MITE/Stow	chr01	6718349	6719944	-	Lipase, GDSL domain containing protein. (Os01t0223000-01)
japonica	TIP_34204	Os05g0161500	OS05T0161500-01	0,004280309	-0,764280057	0,21399899	down	R3	TIP	wet	82	0,170731707	chr05	3628628	DNAnona/hAT	chr05	3626394	3629080	+	Calcium-activated (p)ppGpp synthetase, Ca<sup>2+</sup>-activated RelA-SpoT homolog 2 (Os05t0161500-01)
japonica	TIP_20989	Os03g0301800	OS03T0301800-01	0,004634687	-0,366577685	0,212112915	down	R3	TIP	wet	81	0,962962963	chr03	10629061	MITE/Stow	chr03	10629886	10632864	-	Similar to Kinesin-like polypeptides 9 (Fragment). (Os03t0301800-01)
japonica	TIP_1657	Os01g0227400	OS01T0227400-01	0,004634687	0,686934596	0,211740909	up	R3	TIP	wet	82	0,768292683	chr01	7049698	MITE/Stow	chr01	7049941	7050874	+	Similar to Cytochrome P450 71A1 (EC 1.14.-.-) (CYPLXXIA1) (ARP-2). (Os01t0227400-01)
japonica	TIP_16025	Os02g0656200	OS02T0656200-01	0,004708347	-0,711285115	0,21084741	down	R3	TIP	wet	82	0,93902439	chr02	26504262	MITE/Tourist	chr02	26504378	26510073	-	Similar to Ceramide kinase. (Os02t0656200-01)
japonica	TIP_49218	Os07g0423000	OS07T0423000-01	0,004708347	-0,412236002	0,21071475	down	R3	TIP	wet	72	0,930555556	chr07	13659358	LTR/Gypsy	chr07	13654341	13655841	-	Mitochodrial transcription termination factor-related family protein. (Os07t0423000-01)
japonica	TIP_3257	Os01g0337900	OS01T0337900-01	0,005575217	-0,527715472	0,207155137	down	R3	TIP	wet	82	0,707317073	chr01	13270256	DNAnona/MULE	chr01	13272614	13282008	+	Similar to Dihydrolipoamide dehydrogenase. (Os01t0337900-01)
japonica	TIP_66964	Os10g0578050	OS10T0578050-01	0,006291814	-0,316428733	0,204505387	down	R3	TIP	wet	82	0,914634146	chr10	23057828	DNAauto/MULE	chr10	23055146	23060773	+	Conserved hypothetical protein. (Os10t0578050-01);Hypothetical protein. (Os10t0578050-02)
japonica	TIP_44404	Os06g0581300	OS06T0581300-01	0,007220661	-0,762944687	0,201281646	down	R3	TIP	wet	82	0,841463415	chr06	22700337	MITE/Tourist	chr06	22699043	22704976	+	Hypothetical conserved gene. (Os06t0581300-01);Protein of unknown function DUF1475 family protein. (Os06t0581300-02)
japonica	TIP_32894	Os04g0653000	OS04T0653000-01	0,007220661	0,605607212	0,201195929	up	R3	TIP	wet	82	0,695121951	chr04	33310571	MITE/Tourist	chr04	33306468	33310169	+	Jasmonic acid (JA) signalling repressor, Regulation of spikelet development (Os04t0653000-01)
japonica	TIP_65672	Os10g0484300	OS10T0484300-01	0,007697502	-0,594189963	0,199639807	down	R3	TIP	wet	82	0,62195122	chr10	18297546	MITE/Tourist	chr10	18297933	18300228	-	Pentatricopeptide repeat domain containing protein. (Os10t0484300-01)
japonica	TIP_6620	Os01g0705200	OS01T0705200-01	0,008720048	0,58399992	0,196920823	up	R3	TIP	wet	82	0,06097561	chr01	29234665	DNAnona/unknown	chr01	29233040	29234256	-	Late embryogenesis abundant protein repeat containing protein. (Os01t0705200-01)
japonica	TIP_731	Os01g0174900	OS01T0174900-01	0,009170554	0,480028867	0,195312537	up	R3	TIP	wet	82	0,646341463	chr01	3837907	DNAnona/MULE	chr01	3842779	3845436	+	Thioredoxin fold domain containing protein. (Os01t0174900-01)
japonica	TIP_732	Os01g0174900	OS01T0174900-01	0,009170554	-0,480028867	0,195312537	down	R3	TIP	wet	82	0,353658537	chr01	3839392	MITE/Tourist	chr01	3842779	3845436	+	Thioredoxin fold domain containing protein. (Os01t0174900-01)
japonica	TIP_66265	Os10g0528100	OS10T0528100-01	0,00918825	0,394900463	0,194962755	up	R3	TIP	wet	82	0,317073171	chr10	20554824	DNAnona/hAT	chr10	20551209	20552361	+	Similar to Glutathione S-transferase GST 42 (EC 2.5.1.18) (Fragment). (Os10t0528100-01)
japonica	TIP_15109	Os02g0584800	OS02T0584800-01	0,009438146	0,980114394	0,193940466	up	R3	TIP	wet	82	0,109756098	chr02	22556362	MITE/Tourist	chr02	22553380	22554242	-	Heavy metal transport/detoxification protein domain containing protein. (Os02t0584800-01)
japonica	TIP_32891	Os04g0653000	OS04T0653000-01	0,009438146	0,601430872	0,193835321	up	R3	TIP	wet	82	0,707317073	chr04	33303047	MITE/Tourist	chr04	33306468	33310169	+	Jasmonic acid (JA) signalling repressor, Regulation of spikelet development (Os04t0653000-01)
japonica	TIP_24428	Os03g0655400	OS03T0655400-01	0,009455827	0,840700556	0,193500682	up	R3	TIP	wet	75	0,893333333	chr03	25565055	MITE/Tourist	chr03	25563660	25564431	+	Similar to LIP5. (Os03t0655400-01)
japonica	TIP_58188	Os09g0114500	OS09T0114500-04	0,009525364	-0,269934618	0,193065375	down	R3	TIP	wet	82	0,87804878	chr09	1171005	DNAnona/MULEtir	chr09	1158082	1167873	+	Kinesin-4 protein with transcription regulation activity, Cell cycle and wall modification, Cell elongation by regulating GA biosynthesis pathway (Os09t0114500-01);Similar to Kinesin-like protein. (Os09t0114500-02);Similar to FRA1 (FRAGILE FIBER 1); microtubule motor. (Os09t0114500-03);Hypothetical protein. (Os09t0114500-04)
japonica	TIP_49046	Os07g0409100	OS07T0409100-01	0,009580416	-0,63519814	0,192664463	down	R3	TIP	wet	82	0,585365854	chr07	12747262	DNAnona/MULE	chr07	12747743	12760653	+	Synaptotagmin-5 protein, Ca<sup>2+</sup> sensing protein with a C2 domain, Drought tolerance (Os07t0409100-01)
japonica	TIP_68116	Os11g0210600	OS11T0210600-01	0,009585674	0,724892324	0,192368242	up	R3	TIP	wet	82	0,243902439	chr11	5761279	MITE/Tourist	chr11	5755644	5758642	-	Similar to Alcohol dehydrogenase (Fragment). (Os11t0210600-01)
japonica	TIP_20176	Os03g0241900	OS03T0241900-02	0,010865609	-0,228893833	0,189554653	down	R3	TIP	wet	79	0,886075949	chr03	7499684	MITE/Tourist	chr03	7500164	7503768	-	Similar to Senescence-associated protein 12. (Os03t0241900-02);Similar to Senescence-associated protein, expressed. (Os03t0241900-03)
japonica	TIP_26515	Os03g0798200	OS03T0798200-01	0,010865609	-0,704532469	0,189388157	down	R3	TIP	wet	82	0,963414634	chr03	33272650	MITE/Tourist	chr03	33267192	33272140	+	RING Ub E3 ligase, Positive regulator of salt and osmotic stress tolerance (Os03t0798200-01)
japonica	TIP_695	Os01g0170600	OS01T0170600-02	0,012607426	-0,631470915	0,18623376	down	R3	TIP	wet	82	0,463414634	chr01	3651493	DNAnona/MULE	chr01	3645508	3650691	+	Hypothetical conserved gene. (Os01t0170600-01);UspA domain containing protein. (Os01t0170600-02)
japonica	TIP_49883	Os07g0484800	OS07T0484800-01	0,012610663	-0,371406252	0,185957454	down	R3	TIP	wet	82	0,804878049	chr07	17803934	MITE/Stow	chr07	17787901	17801227	-	Similar to Adenine phosphoribosyltransferase (EC 2.4.2.7)-like protein. (Os07t0484800-01)
japonica	TIP_48427	Os07g0249800	OS07T0249800-01	0,012779155	-0,584923933	0,185432194	down	R3	TIP	wet	81	0,962962963	chr07	8334044	MITE/Tourist	chr07	8326644	8329267	-	Similar to IAA-amino acid hydrolase ILR1-like 8. (Os07t0249800-01)
japonica	TIP_75819	Os12g0632800	OS12T0632800-00	0,012888213	0,401786794	0,184990849	up	R3	TIP	wet	82	0,06097561	chr12	27113001	MITE/Tourist	chr12	27109127	27112150	+	Protein kinase, catalytic domain domain containing protein. (Os12t0632800-00)
japonica	TIP_34189	Os05g0160300	OS05T0160300-01	0,012888213	0,691737312	0,184742348	up	R3	TIP	wet	82	0,304878049	chr05	3540995	MITE/Stow	chr05	3539620	3540966	-	Bifunctional inhibitor/plant lipid transfer protein/seed storage domain containing protein. (Os05t0160300-01)
japonica	TIP_6873	Os01g0725000	OS01T0725000-01	0,012921494	-0,627885566	0,184139	down	R3	TIP	wet	82	0,317073171	chr01	30240509	DNAnona/hAT	chr01	30236130	30236776	+	Similar to H0402C08.3 protein. (Os01t0725000-01)
japonica	TIP_41613	Os06g0239700	OS06T0239700-01	0,012921494	0,590284213	0,183930118	up	R3	TIP	wet	82	0,829268293	chr06	7261698	MITE/Stow	chr06	7260409	7263955	+	Conserved hypothetical protein. (Os06t0239700-01)
japonica	TIP_41614	Os06g0239700	OS06T0239700-01	0,012921494	-0,590284213	0,183930118	down	R3	TIP	wet	82	0,170731707	chr06	7263310	DNAnona/MULE	chr06	7260409	7263955	+	Conserved hypothetical protein. (Os06t0239700-01)
japonica	TIP_28709	Os04g0338100	OS04T0338100-01	0,014387418	-0,697867856	0,181590999	down	R3	TIP	wet	82	0,780487805	chr04	15927749	LTR/Copia	chr04	15924375	15928109	+	Similar to IN2-2 protein. (Os04t0338100-01)
japonica	TIP_3320	Os01g0343300	OS01T0343300-01	0,015483682	0,677721022	0,179914098	up	R3	TIP	wet	82	0,841463415	chr01	13569987	MITE/Tourist	chr01	13570702	13573119	+	GATA transcription factor, Tolerance to abiotic stresses (salinity, drought, and ABA), Seed development (Os01t0343300-01)
japonica	TIP_169	Os01g0116900	OS01T0116900-00	0,017120271	0,535328048	0,177493177	up	R3	TIP	wet	80	0,1875	chr01	937226	MITE/Tourist	chr01	924451	956639	+	Protein kinase, catalytic domain domain containing protein. (Os01t0116900-00)
japonica	TIP_48421	Os07g0249800	OS07T0249800-01	0,017120271	-0,384380156	0,177469156	down	R3	TIP	wet	82	0,914634146	chr07	8328656	MITE/Stow	chr07	8326644	8329267	-	Similar to IAA-amino acid hydrolase ILR1-like 8. (Os07t0249800-01)
japonica	TIP_48911	Os07g0288700	OS07T0288700-02	0,017564187	-0,608572502	0,176731299	down	R3	TIP	wet	82	0,207317073	chr07	11180325	MITE/Stow	chr07	11170896	11182966	+	Similar to white-brown-complex ABC transporter family. (Os07t0288700-01);ABC transporter-like domain containing protein. (Os07t0288700-02)
japonica	TIP_54128	Os08g0249000	OS08T0249000-01	0,018226211	-0,488876148	0,175772547	down	R3	TIP	wet	82	0,231707317	chr08	9098180	DNAnona/MULE	chr08	9098485	9099878	+	Zinc finger, B-box domain containing protein. (Os08t0249000-01)
japonica	TIP_11285	Os02g0197200	OS02T0197200-01	0,018493296	-0,58102756	0,175255742	down	R3	TIP	wet	82	0,097560976	chr02	5441895	MITE/Stow	chr02	5442081	5447353	+	Mlo-related protein family protein. (Os02t0197200-01)
japonica	TIP_9723	Os01g0954000	OS01T0954000-01	0,019362375	0,972489719	0,174126181	up	R3	TIP	wet	82	0,06097561	chr01	42023200	LTR/Copia	chr01	42018073	42019444	+	NADPH-dependent FMN reductase family protein. (Os01t0954000-01)
japonica	TIP_168	Os01g0116900	OS01T0116900-00	0,01956812	0,433351929	0,173692031	up	R3	TIP	wet	80	0,65	chr01	928342	DNAnona/hAT	chr01	924451	956639	+	Protein kinase, catalytic domain domain containing protein. (Os01t0116900-00)
japonica	TIP_27094	Os03g0850600	OS03T0850600-01	0,020782631	0,473094616	0,172285398	up	R3	TIP	wet	82	0,195121951	chr03	35813040	DNAnona/PILE	chr03	35806060	35808891	-	Similar to Integral membrane protein. (Os03t0850600-01)
japonica	TIP_55548	Os08g0398400	OS08T0398400-01	0,021159621	-0,503737265	0,171710092	down	R3	TIP	wet	82	0,743902439	chr08	19013204	MITE/Stow	chr08	19011905	19015935	+	Hypersensitive induced reaction protein, Bacterial pathogen resistance (Os08t0398400-01)
japonica	TIP_48422	Os07g0249800	OS07T0249800-01	0,021428873	-0,309524666	0,171191905	down	R3	TIP	wet	82	0,865853659	chr07	8329618	DNAnona/hAT	chr07	8326644	8329267	-	Similar to IAA-amino acid hydrolase ILR1-like 8. (Os07t0249800-01)
japonica	TIP_74638	Os12g0538600	OS12T0538600-00	0,021428873	0,403599387	0,17102454	up	R3	TIP	wet	82	0,073170732	chr12	21466541	DNAnona/CACTA	chr12	21469144	21469455	+	Thioredoxin fold domain containing protein. (Os12t0538600-00)
japonica	TIP_27406	Os04g0121100	OS04T0121100-01	0,022978145	0,567694057	0,169435615	up	R3	TIP	wet	82	0,390243902	chr04	1257157	MITE/Tourist	chr04	1248450	1260282	+	Similar to OSIGBa0115D20.4 protein. (Os04t0121100-01)
japonica	TIP_36305	Os05g0320800	OS05T0320800-01	0,02396442	-0,648946518	0,168183331	down	R3	TIP	wet	82	0,158536585	chr05	14903317	MITE/Tourist	chr05	14906587	14907252	+	Hypothetical protein. (Os05t0320800-01)
japonica	TIP_12800	Os02g0318600	OS02T0318600-00	0,02396442	-0,502154634	0,168107239	down	R3	TIP	wet	82	0,926829268	chr02	12680915	MITE/Tourist	chr02	12680087	12680627	-	Similar to PDR-like ABC transporter. (Os02t0318600-00)
japonica	TIP_32282	Os04g0604250	OS04T0604250-01	0,02396442	-0,600268011	0,167975017	down	R3	TIP	wet	82	0,719512195	chr04	30482181	LINE/unknown	chr04	30477844	30478399	-	Conserved hypothetical protein. (Os04t0604250-01)
japonica	TIP_73851	Os12g0441700	OS12T0441700-01	0,024467428	0,544216764	0,167358737	up	R3	TIP	wet	82	0,682926829	chr12	14753357	MITE/Tourist	chr12	14754353	14757981	-	Conserved hypothetical protein. (Os12t0441700-01)
japonica	TIP_23764	Os03g0610900	OS03T0610900-01	0,027704448	0,439853673	0,1646998	up	R3	TIP	wet	82	0,085365854	chr03	23067784	DNAnona/MULE	chr03	23068746	23071156	-	Serine/threonine protein kinase, Abscisic acid (ABA)-activated protein kinase, Hyperosmotic stress response, ABA signal transduction (Os03t0610900-01)
japonica	TIP_54046	Os08g0241300	OS08T0241300-01	0,027806892	-0,246679132	0,164423961	down	R3	TIP	wet	80	0,825	chr08	8578439	DNAnona/MULE	chr08	8570830	8575238	+	Similar to OSIGBa0118P15.3 protein. (Os08t0241300-01)
japonica	TIP_32892	Os04g0653000	OS04T0653000-01	0,027957383	0,535798611	0,164116357	up	R3	TIP	wet	82	0,670731707	chr04	33303873	MITE/Tourist	chr04	33306468	33310169	+	Jasmonic acid (JA) signalling repressor, Regulation of spikelet development (Os04t0653000-01)
japonica	TIP_58637	Os09g0256100	OS09T0256100-00	0,031745486	0,315530036	0,161209495	up	R3	TIP	wet	82	0,146341463	chr09	4250407	LTR/TRIM	chr09	4250749	4251832	+	Similar to flavonol 4-sulfotransferase. (Os09t0256100-00)
japonica	TIP_41394	Os06g0224900	OS06T0224900-02	0,031745486	-0,289186576	0,16119433	down	R3	TIP	wet	82	0,902439024	chr06	6475265	DNAnona/unknown	chr06	6472173	6473672	-	Mitochodrial transcription termination factor-related family protein. (Os06t0224900-01);Mitochodrial transcription termination factor-related family protein. (Os06t0224900-02)
japonica	TIP_40073	Os06g0109200	OS06T0109200-01	0,031745486	-0,67326516	0,161007701	down	R3	TIP	wet	82	0,926829268	chr06	547297	MITE/Stow	chr06	543057	545777	+	Protein of unknown function DUF6, transmembrane domain containing protein. (Os06t0109200-01)
japonica	TIP_58942	Os09g0287500	OS09T0287500-01	0,0337915	-0,626544549	0,159574421	down	R3	TIP	wet	82	0,890243902	chr09	6437899	DNAnona/Helitron	chr09	6439640	6441905	-	Protein of unknown function DUF565 family protein. (Os09t0287500-01)
japonica	TIP_39335	Os05g0546300	OS05T0546300-01	0,034756153	0,738651252	0,158823334	up	R3	TIP	wet	80	0,8125	chr05	27120418	DNAnona/MULE	chr05	27119121	27120202	+	Hypothetical protein. (Os05t0546300-01)
japonica	TIP_59095	Os09g0299400	OS09T0299400-00	0,034887323	-0,482480016	0,158558296	down	R3	TIP	wet	82	0,902439024	chr09	7337364	MITE/Stow	chr09	7336243	7340325	-	Similar to TPK1. (Os09t0299400-00)
japonica	TIP_40855	Os06g0184800	OS06T0184800-01	0,03693518	-0,540522195	0,157235476	down	R3	TIP	wet	82	0,682926829	chr06	4260021	MITE/Stow	chr06	4264424	4265115	-	Similar to Low-temperature induced protein lt101.1 (Blt101) (Blt101.1). (Os06t0184800-01)
japonica	TIP_45560	Os06g0661600	OS06T0661600-01	0,036941374	0,916040742	0,1570453	up	R3	TIP	wet	82	0,93902439	chr06	27269316	DNAnona/MULE	chr06	27262815	27264826	+	Zinc finger, DPH-type domain containing protein. (Os06t0661600-01)
japonica	TIP_2351	Os01g0274100	OS01T0274100-00	0,037778055	-0,553564075	0,156414346	down	R3	TIP	wet	82	0,93902439	chr01	9519372	MITE/Tourist	chr01	9512985	9515102	+	Similar to disulfide oxidoreductase/ monooxygenase/ oxidoreductase. (Os01t0274100-00)
japonica	TIP_64162	Os10g0368400	OS10T0368400-01	0,037902399	0,387382148	0,156165395	up	R3	TIP	wet	82	0,231707317	chr10	11545391	SINE/unknown	chr10	11543109	11546028	-	Similar to Adapter-related protein complex 4 sigma 1 subunit (Sigma subunit of AP-4) (AP-4 adapter complex sigma subunit). (Os10t0368400-01)
japonica	TIP_72683	Os12g0210300	OS12T0210300-01	0,040182819	-0,617627902	0,154819348	down	R3	TIP	wet	82	0,817073171	chr12	5756511	DNAnona/MULE	chr12	5760537	5763699	+	Zeta class glutathione transferase, Cold tolerance (Os12t0210300-01)
japonica	TIP_2492	Os01g0281100	OS01T0281100-01	0,04466906	0,442349125	0,152526921	up	R3	TIP	wet	82	0,743902439	chr01	10008036	LTR/TRIM	chr01	10008075	10011595	-	Conserved hypothetical protein. (Os01t0281100-01)
japonica	TIP_51880	Os07g0643400	OS07T0643400-01	0,045116761	-0,493964999	0,152029659	down	R3	TIP	wet	82	0,280487805	chr07	26786932	LTR/unknown	chr07	26790870	26792040	-	Alpha/beta hydrolase fold-3 domain containing protein. (Os07t0643400-01)
japonica	TIP_61873	Os09g0523200	OS09T0523200-00	0,045116761	-0,368679115	0,151971006	down	R3	TIP	wet	82	0,951219512	chr09	20438840	DNAnona/hAT	chr09	20434450	20435065	-	Hypothetical conserved gene. (Os09t0523200-00)
japonica	TIP_44487	Os06g0594100	OS06T0594100-01	0,047606132	0,618397477	0,150721322	up	R3	TIP	wet	79	0,898734177	chr06	23343798	DNAnona/MULE	chr06	23343928	23350815	+	Crotonase, core domain containing protein. (Os06t0594100-01);Similar to predicted protein. (Os06t0594100-02)
japonica	TIP_53770	Os08g0203300	OS08T0203300-01	0,047786958	0,900222541	0,150307447	up	R3	TIP	wet	82	0,048780488	chr08	6003848	DNAnona/MULE	chr08	5998167	6005500	+	Similar to SHR5-receptor-like kinase (Fragment). (Os08t0203300-01)
japonica	TIP_52047	Os07g0661600	OS07T0661600-03	0,047786958	-0,367010445	0,150297623	down	R3	TIP	wet	81	0,864197531	chr07	27921814	DNAnona/unknown	chr07	27915771	27921192	-	Similar to RNA-binding protein-like protein. (Os07t0661600-01);Similar to RNA-binding protein. (Os07t0661600-03)
japonica	TIP_49904	Os07g0486500	OS07T0486500-02	0,04879764	-0,448846739	0,149707081	down	R3	TIP	wet	82	0,182926829	chr07	17912109	MITE/Tourist	chr07	17907341	17912298	+	RhoGAP domain containing protein. (Os07t0486500-01);RhoGAP domain containing protein. (Os07t0486500-02)
japonica	TIP_27472	Os04g0136900	OS04T0136900-01	0,04925663	0,495482164	0,149349327	up	R3	TIP	wet	82	0,731707317	chr04	2447339	LTR/Copia	chr04	2441510	2447771	+	Similar to OSIGBa0147B06.6 protein. (Os04t0136900-01)
[truncated: 367 more rows]
