# Supplementary material for: Transposons are important contributors to gene expression variability under selection in rice populations
Source: eLife. 2023 Jul 19;12:RP86324. doi: 10.7554/eLife.86324 (PMC10393045; doi:10.7554/eLife.86324)
Supplement: Supplementary file 2. [file elife-86324-supp2.xlsx]

## Sheet: Sheet1
TE family	total TIP-eQTL	up *	down **	up %	down %
TIR/CACTA	8	3	5	37.5	62.5
TIR/CACTG	3	0	3	0	100
TIR/Helitron	59	22	37	37.2881	62.7119
TIR/MLE	5	1	4	20	80
TIR/MULE	158	76	82	48.1013	51.8987
TIR/PILE	5	3	2	60	40
TIR/POLE	5	2	3	40	60
TIR/hAT	67	25	42	37.3134	62.6866
TIR/unknown	19	8	11	42.1053	57.8947
MITE/Stow	172	69	103	40.1163	59.8837
MITE/Tourist	189	79	110	41.7989	58.2011
LINE	32	12	20	37.5	62.5
LTR/Copia	42	15	27	35.7143	64.2857
LTR/Gypsy	45	15	30	33.3333	66.6667
LTR/TRIM	4	4	0	100	0
LTR/unknown	1	0	1	0	100
SINE/unknown	29	10	19	34.4828	65.5172
* Up = Positive effect on expression when the TE is present
** Down = Negative effect on expression when the TE is present
