# Supplementary material for: Transposons are important contributors to gene expression variability under selection in rice populations
Source: eLife. 2023 Jul 19;12:RP86324. doi: 10.7554/eLife.86324 (PMC10393045; doi:10.7554/eLife.86324)
Supplement: Supplementary file 4. [file elife-86324-supp4.xlsx]

## Sheet: Hoja1
RUN	Species	Bioproject	Reference
ERR2245554	O. rufipogon	PRJEB19404	Zhao, Q. et al. Pan-genome analysis highlights the extent of genomic variation in cultivated and wild rice. Nat Genet 50, 278–284 (2018).
ERR2245557	O. rufipogon
ERR2245552	O. rufipogon
ERR2245548	O. rufipogon
ERR2245549	O. rufipogon
ERR2240126	O. rufipogon
ERR2245551	O. rufipogon
ERR2245550	O. rufipogon
ERR2245556	O. rufipogon
ERR2240123	O. rufipogon
SRR5882917	O. rufipogon	PRJNA396096	Yu, H. et al. Genome-Wide Analysis of Genetic Variations and the Detection of Rich Variants of NBS-LRR Encoding Genes in Common Wild Rice Lines. Plant Mol Biol Report 36, 618–630 (2018).
SRR5880384	O. rufipogon
SRR5881095	O. rufipogon
SRR6220517	O. rufipogon	PRJNA407820	Wang, M. et al. Parallel selection on a dormancy gene during domestication of crops from multiple families. Nat Genet 50, 1435–1441 (2018).
SRR6220518	O. rufipogon
SRR6220519	O. rufipogon
SRR6220543	O. rufipogon
SRR6220516	O. rufipogon
SRR6220533	O. rufipogon
SRR6220520	O. rufipogon
SRR6220531	O. rufipogon
SRR6220534	O. rufipogon
SRR6220544	O. rufipogon
SRR6220532	O. rufipogon
SRR6220472	O. rufipogon
SRR6220537	O. rufipogon
SRR6220471	O. rufipogon
SRR6220538	O. rufipogon
SRR6220536	O. rufipogon
SRR6220476	O. rufipogon
SRR6220473	O. rufipogon
SRR6220475	O. rufipogon
SRR6220474	O. rufipogon
SRR6220502	O. rufipogon
SRR6220521	O. rufipogon
SRR6220477	O. rufipogon
SRR6220505	O. rufipogon
SRR6220497	O. rufipogon
SRR6220479	O. rufipogon
SRR6220480	O. rufipogon
SRR6220478	O. rufipogon
SRR6220507	O. rufipogon
SRR6220498	O. rufipogon
SRR6220501	O. rufipogon
SRR6220503	O. rufipogon
SRR6220504	O. rufipogon
SRR6220506	O. rufipogon
SRR6220508	O. rufipogon
SRR6220419	O. rufipogon
SRR6220424	O. rufipogon
SRR6220425	O. rufipogon
SRR6220427	O. rufipogon
SRR6220418	O. rufipogon
SRR6220426	O. rufipogon
ERR068809	O. rufipogon	PRJEB2829	Huang, X. et al. A map of rice genome variation reveals the origin of cultivated rice. Nature 490, 497–501 (2012).
ERR069038	O. rufipogon
ERR068748	O. rufipogon
ERR068733	O. rufipogon
ERR068784	O. rufipogon
ERR068764	O. rufipogon
ERR068678	O. rufipogon
ERR068632	O. rufipogon
ERR068681	O. rufipogon
ERR068985	O. rufipogon
ERR068741	O. rufipogon
ERR068913	O. rufipogon
ERR068682	O. rufipogon
DRR000466	O. rufipogon	PRJDA39855	Khush, G. S. Origin, dispersal, cultivation and variation of rice. Plant Molecular Biology vol. 35 (1997).
DRR000465	O. rufipogon
DRR000348	O. rufipogon
DRR000347	O. rufipogon
SRR1450138 *	O. nivara	PRJNA48107	Ammiraju, J. S. S. et al. The Oryza bacterial artificial chromosome library resource: Construction and analysis of 12 deep-coverage large-insert BAC libraries that represent the 10 genome types of the genus Oryza. Genome Res 16, 140–147 (2006).
SRR1450141	O. nivara
SRR1450142 *	O. nivara
SRR1450144 *	O. nivara
SRR1528449 *	O. nivara
SRR1528450	O. nivara
SRR1528451	O. nivara
SRR1528452	O. nivara
SRR1528453	O. nivara
SRR12702033	O. nivara	PRJNA664261	Phitaktansakul, R. et al. Multi-omics analysis reveals the genetic basis of rice fragrance mediated by betaine aldehyde dehydrogenase 2. J Adv Res (2021) doi:10.1016/j.jare.2021.12.004.
* Subsampled to 30X
