# Supplementary material for: Transposons are important contributors to gene expression variability under selection in rice populations
Source: eLife. 2023 Jul 19;12:RP86324. doi: 10.7554/eLife.86324 (PMC10393045; doi:10.7554/eLife.86324)
Supplement: Supplementary file 5. [file elife-86324-supp5.xlsx]

## Sheet: Sheet1
tip	freq_indica	freq_japonica	freq_rufipogon	PBS_ind_jap	absolute_PBS	gene_ID	description
TIP_64687	0,031746032	0,951219512	0.61039	0,499484211	0,499484211	Os10g0407500	Similar to exonuclease. (Os10t0407500-00)
TIP_47232	0,095238095	0,914634146	0.934211	0,480515928	0,480515928	Os07g0162500	Alpha/beta hydrolase fold-3 domain containing protein. (Os07t0162500-02)
TIP_17368	0,031746032	0,951219512	0.567568	0,457338901	0,457338901	Os02g0755900	UDP-glucuronosyl/UDP-glucosyltransferase domain containing protein. (Os02t0755900-01)
TIP_53500	0,944444444	0,243902439	0.153846	0,375884717	0,375884717	Os08g0174700	A member of the somatic embryogenesis receptor kinases (SERKs) family, Brassinosteroid (BR) signaling, Regulation of plant architecture (Os08t0174700-01)
TIP_15109	0,888888889	0,109756098	0.142857	0,361539434	0,361539434	Os02g0584800	Heavy metal transport/detoxification protein domain containing protein. (Os02t0584800-01)
TIP_15109	0,888888889	0,109756098	0.142857	0,361539434	0,361539434	Os02g0584700	Heavy metal transport/detoxification protein domain containing protein. (Os02t0584700-01)
TIP_75593	0,968253968	0,085365854	0.534247	0,354189954	0,354189954	Os12g0616200	HUELLENLOS-like protein. (Os12t0616200-01)
TIP_45983	0,968253968	0,268292683	0.25	0,351649858	0,351649858	Os06g0691100	Pathogenesis-related transcriptional factor and ERF domain containing protein. (Os06t0691100-00)
TIP_61631	0,968253968	0,073170732	0.623377	0,322109345	0,322109345	Os09g0505300	Similar to Br FatA1. (Os09t0505300-01)
TIP_24732	0,071428571	0,890243902	0.6	0,311304824	0,311304824	Os03g0675700	Conserved hypothetical protein. (Os03t0675700-01)
TIP_72732	0,365079365	0,962962963	0.012987	-0,295568094	0,295568094	Os12g0226400	Similar to 2-alkenal reductase. (Os12t0226400-00)
TIP_38281	0,849206349	0,036585366	0.213333	0,293016814	0,293016814	Os05g0467300	SelT/selW/selH selenoprotein family protein. (Os05t0467300-01)
TIP_30850	0,865079365	0,036585366	0.328947	0,288082797	0,288082797	Os04g0498600	S-adenosylmethionine decarboxylase, Polyamine biosynthesis, Salt and drought stresses, Abiotic stress (Os04t0498600-01);Similar to cDNA clone:J013002M21, full insert sequence. (Os04t0498600-02)
TIP_15111	0,12195122	0,865853659	0.805195	0,278065295	0,278065295	Os02g0584800	Heavy metal transport/detoxification protein domain containing protein. (Os02t0584800-01)
TIP_37988	0,873015873	0,134146341	0.256757	0,276800778	0,276800778	Os05g0443900	Ortholog of ZmLG2, bZIP transcriptional factor, Lamina joint positioning and differentiation (Os05t0443900-01)
TIP_19418	0,785714286	0,036585366	0.12987	0,272158126	0,272158126	Os03g0188100	Similar to transparent testa 12 protein. (Os03t0188100-01);Multidrug and toxic compound extrusion (MATE) protein family transporter, Regulation of plant growth and development, Disease resistance (Os03t0188100-02)
TIP_51891	0,048	0,725	0.626667	0,270681075	0,270681075	Os07g0644600	Cytochrome P450 family protein. (Os07t0644600-01)
TIP_51891	0,048	0,725	0.626667	0,270681075	0,270681075	Os07g0644700	Hypothetical conserved gene. (Os07t0644700-00)
TIP_3413	0,080645161	0,841463415	0.68	0,26785512	0,26785512	Os01g0355800	Similar to Esterase PIR7A. (Os01t0355800-00)
TIP_75781	0,896825397	0,109756098	0.350649	0,262987768	0,262987768	Os12g0628100	Similar to Actin-depolymerizing factor 6 (ADF-6) (AtADF6). (Os12t0628100-01)
TIP_75781	0,896825397	0,109756098	0.350649	0,262987768	0,262987768	Os12g0628300	Conserved hypothetical protein. (Os12t0628300-01)
TIP_30853	0,142857143	0,962962963	0.631579	0,25461429	0,25461429	Os04g0499200	Enhancer of rudimentary family protein. (Os04t0499200-01)
TIP_66888	0,833333333	0,085365854	0.266667	0,239844733	0,239844733	Os10g0572300	Leucine-rich repeat, typical subtype containing protein. (Os10t0572300-01);Similar to Protein lap4. (Os10t0572300-02)
TIP_47231	0,864	0,037037037	0.407895	0,232940513	0,232940513	Os07g0162500	Alpha/beta hydrolase fold-3 domain containing protein. (Os07t0162500-02)
TIP_40526	0,073170732	0,775	0.630137	0,232222771	0,232222771	Os06g0152700	Protein of unknown function DUF821, CAP10-like family protein. (Os06t0152700-01)
TIP_40526	0,073170732	0,775	0.630137	0,232222771	0,232222771	Os06g0152550	Conserved hypothetical protein. (Os06t0152550-01)
TIP_50059	0,959677419	0,5	0.226667	0,22687472	0,22687472	Os07g0500300	C2-domain abscisic acid-related protein, CAR protein, Regulation of ABA signaling in seed germination (Os07t0500300-01)
TIP_33852	0,182539683	0,890243902	0.773333	0,225561662	0,225561662	Os05g0128400	Cation diffusion facilitator (CDF) family protein, Bivalent cation transporter, Translocation of Zn, Cd and other heavy metals, Ion homeostasis (Os05t0128400-01)
TIP_29156	0,238095238	0,951219512	0.84	0,223244903	0,223244903	Os04g0379900	Similar to Acyl-[acyl-carrier-protein] desaturase, chloroplast precursor (EC 1.14.19.2) (Stearoyl-ACP desaturase). (Os04t0379900-01)
TIP_50057	0,032	0,487804878	0.727273	0,222435116	0,222435116	Os07g0500300	C2-domain abscisic acid-related protein, CAR protein, Regulation of ABA signaling in seed germination (Os07t0500300-01)
TIP_33871	0,944444444	0,170731707	0.592105	0,216622661	0,216622661	Os05g0130200	Conserved hypothetical protein. (Os05t0130200-01)
TIP_51333	0,936507937	0,304878049	0.394737	0,211455285	0,211455285	Os07g0601000	Similar to NADPH HC toxin reductase (Fragment). (Os07t0601000-01)
TIP_36305	0,841269841	0,158536585	0.28	0,208808772	0,208808772	Os05g0320800	Hypothetical protein. (Os05t0320800-01)
TIP_59918	0,176	0,756097561	0.90411	0,204022046	0,204022046	Os09g0382500	Conserved hypothetical protein. (Os09t0382500-01)
TIP_51880	0,888888889	0,280487805	0.297297	0,202036674	0,202036674	Os07g0643400	Alpha/beta hydrolase fold-3 domain containing protein. (Os07t0643400-01)
TIP_73985	0,048780488	0,512820513	0.753425	0,195199492	0,195199492	Os12g0458100	Transferase family protein. (Os12t0458100-01)
TIP_61206	0,23015873	0,963414634	0.710526	0,191342712	0,191342712	Os09g0470500	Homeodomain-leucine zipper (HD-Zip) protein, Regulation of gibberellin signaling (Os09t0470500-01)
TIP_67871	0,126984127	0,658536585	0.736842	0,178503326	0,178503326	Os11g0184900	Similar to OsNAC5 protein [imported]-rice. (Os11t0184900-01);NAC-type transcription factor, Regulation of stress-inducible genes, Stress tolerance (Os11t0184900-02)
TIP_46974	0,658730159	0,048780488	0.0666667	0,176896091	0,176896091	Os07g0142900	Aldo/keto reductase family protein. (Os07t0142900-01)
TIP_52367	0,968253968	0,43902439	0.546667	0,17265412	0,17265412	Os07g0684000	S-type euonymus-related lectin (EUL), Response to salt and drought stress, ABA treatment, Response to biotic treatment (Os07t0684000-01)
TIP_33521	0,119047619	0,865853659	0.473684	0,169856173	0,169856173	Os05g0105000	Similar to Methionine S-methyltransferase (EC 2.1.1.12) (AdoMet:Met S- methyltransferase) (Hv-MMT1). (Os05t0105000-01)
TIP_14432	0,172131148	0,817073171	0.693333	0,169624886	0,169624886	Os02g0537700	2-Cys peroxiredoxin (EC 1.11.1.15), Stomatal closure, Potassium deficiency tolerance (Os02t0537700-01)
TIP_67875	0,126984127	0,634146341	0.733333	0,168346132	0,168346132	Os11g0184900	Similar to OsNAC5 protein [imported]-rice. (Os11t0184900-01);NAC-type transcription factor, Regulation of stress-inducible genes, Stress tolerance (Os11t0184900-02)
TIP_66310	0,832	0,219512195	0.276316	0,167570354	0,167570354	Os10g0532800	Conserved hypothetical protein. (Os10t0532800-01);Conserved hypothetical protein. (Os10t0532800-02)
TIP_59638	0,119047619	0,926829268	0.421053	0,167191695	0,167191695	Os09g0362800	Hypothetical conserved gene. (Os09t0362800-01);Peptidase M1, alanine aminopeptidase/leukotriene A4 hydrolase domain containing protein. (Os09t0362800-02)
TIP_30774	0,904761905	0,048780488	0.706667	0,163414775	0,163414775	Os04g0493000	Similar to H0425E08.14 protein. (Os04t0493000-01)
TIP_32891	0,174603175	0,707317073	0.76	0,15921552	0,15921552	Os04g0653000	Jasmonic acid (JA) signalling repressor, Regulation of spikelet development (Os04t0653000-01)
TIP_49742	0,150793651	0,925	0.454545	0,152373123	0,152373123	Os07g0475000	Conserved hypothetical protein. (Os07t0475000-01)
TIP_72761	0,055555556	0,695121951	0.376623	0,151818365	0,151818365	Os12g0228800	Similar to Calmodulin-like protein. (Os12t0228800-01)
TIP_48085	0,920634921	0,048780488	0.779221	0,147052313	0,147052313	Os07g0223766	Hypothetical conserved gene. (Os07t0223766-01)
TIP_744	0,888888889	0,234567901	0.486486	0,145818875	0,145818875	Os01g0175600	Boron (B) transporter (Os01t0175600-01)
TIP_67863	0,119047619	0,634146341	0.613333	0,145169988	0,145169988	Os11g0183900	Similar to Aspartic proteinase Asp1 precursor (EC 3.4.23.-) (OsAsp1) (Nucellin- like protein). (Os11t0183900-01);Similar to Nucellin-like aspartic protease (Fragment). (Os11t0183900-02)
TIP_45706	0,698412698	0,951219512	0.106667	-0,143176197	0,143176197	Os06g0670300	MYB-like transcription factor, Regulation of plant height, Tolerance to cadmium stress (Os06t0670300-01)
TIP_72461	0,880952381	0,12195122	0.605263	0,143019513	0,143019513	Os12g0189400	Similar to Photosystem I reaction centre subunit N, chloroplast precursor (PSI- N). (Os12t0189400-01)
TIP_36155	0,365079365	0,93902439	0.883117	0,142111068	0,142111068	Os05g0311500	Protein of unknown function DUF567 family protein. (Os05t0311500-01)
TIP_46950	0,595238095	0,06097561	0.0649351	0,135031813	0,135031813	Os07g0140633	Hypothetical gene. (Os07t0140633-00)
TIP_66314	0,650793651	0,048780488	0.173333	0,132472154	0,132472154	Os10g0532800	Conserved hypothetical protein. (Os10t0532800-01);Conserved hypothetical protein. (Os10t0532800-02)
TIP_72762	0,063492063	0,62195122	0.394737	0,12874858	0,12874858	Os12g0228800	Similar to Calmodulin-like protein. (Os12t0228800-01)
TIP_32894	0,166666667	0,695121951	0.626667	0,127748181	0,127748181	Os04g0653000	Jasmonic acid (JA) signalling repressor, Regulation of spikelet development (Os04t0653000-01)
TIP_22136	0,213675214	0,679012346	0.822785	0,126529688	0,126529688	Os03g0386000	Similar to Salt-responsive WD40 protein 5. (Os03t0386000-01);WD40 subfamily protein, Salt stress (Os03t0386000-02)
TIP_25520	0,69047619	0,12195122	0.210526	0,126505791	0,126505791	Os03g0726200	Similar to Hydroxyproline-rich glycoprotein DZ-HRGP precursor. (Os03t0726200-01);Hypothetical conserved gene. (Os03t0726200-02)
TIP_61630	0,865079365	0,073170732	0.631579	0,12639483	0,12639483	Os09g0505300	Similar to Br FatA1. (Os09t0505300-01)
TIP_46951	0,587301587	0,073170732	0.106667	0,122036617	0,122036617	Os07g0140633	Hypothetical gene. (Os07t0140633-00)
TIP_18727	0,214285714	0,804878049	0.0131579	-0,116525436	0,116525436	Os03g0134300	Similar to ATP phosphoribosyl transferase. (Os03t0134300-01)
TIP_61873	0,349206349	0,951219512	0.753247	0,116147899	0,116147899	Os09g0523200	Hypothetical conserved gene. (Os09t0523200-00)
TIP_70318	0,682539683	0,036585366	0.293333	0,111055866	0,111055866	Os11g0528300	Protein of unknown function DUF339 family protein. (Os11t0528300-01)
TIP_20764	0,031746032	0,914634146	0.0666667	0,10940964	0,10940964	Os03g0285100	Conserved hypothetical protein. (Os03t0285100-01)
TIP_41185	0,119047619	0,463414634	0.64	0,108801741	0,108801741	Os06g0210200	Peptidase M20 domain containing protein. (Os06t0210200-01)
TIP_47253	0,176	0,890243902	0.424658	0,106245622	0,106245622	Os07g0164300	Qa-SNARE (soluble N-ethylmaleimide sensitive factor attachment protein receptor), t-SNARE, Seed embryogenesis, Seed fertility (Os07t0164300-01)
TIP_44403	0,238095238	0,743902439	0.710526	0,10590184	0,10590184	Os06g0581300	Hypothetical conserved gene. (Os06t0581300-01);Protein of unknown function DUF1475 family protein. (Os06t0581300-02)
TIP_12828	0,603174603	0,036585366	0.828947	-0,105857589	0,105857589	Os02g0320300	Similar to Chalcone isomerase 3. (Os02t0320300-01)
TIP_728	0,904761905	0,353658537	0.594595	0,104880882	0,104880882	Os01g0174100	Conserved hypothetical protein. (Os01t0174100-01)
TIP_65149	0,563492063	0,06097561	0.141026	0,101679868	0,101679868	Os10g0445400	RING finger E3 ligase, Mediation of nuclear-cytoplasmic trafficking of nuclear substrate proteins via monoubiquitination, Regulation of heat-generated signal, Negative regulation of leaf inclination, Modulation of brassinosteroid signaling (Os10t0445400-01)
TIP_40867	0,063492063	0,292682927	0.657895	0,099009143	0,099009143	Os06g0185900	Similar to Glutathione peroxidase. (Os06t0185900-01)
TIP_55228	0,411764706	0,938271605	0.833333	0,0981022	0,0981022	Os08g0366100	Similar to Endothelial differentiation-related factor 1 (EDF-1) (Multiprotein bridging factor 1) (MBF1). (Os08t0366100-01)
TIP_32053	0,208	0,780487805	0.586667	0,09735613	0,09735613	Os04g0585700	Protein of unknown function DUF581 family protein. (Os04t0585700-01)
TIP_24690	0,258064516	0,703703704	0.736842	0,097181617	0,097181617	Os03g0673600	Conserved hypothetical protein. (Os03t0673600-01)
TIP_38609	0,278688525	0,87804878	0.643836	0,09705542	0,09705542	Os05g0492100	Hypothetical protein. (Os05t0492100-01)
TIP_32893	0,738095238	0,231707317	0.328947	0,094763772	0,094763772	Os04g0653000	Jasmonic acid (JA) signalling repressor, Regulation of spikelet development (Os04t0653000-01)
TIP_44465	0,174603175	0,765432099	0.468354	0,091242295	0,091242295	Os06g0591400	Conserved hypothetical protein. (Os06t0591400-01)
TIP_44465	0,174603175	0,765432099	0.468354	0,091242295	0,091242295	Os06g0591200	Conserved hypothetical protein. (Os06t0591200-01)
TIP_2492	0,031746032	0,743902439	0.133333	0,089276311	0,089276311	Os01g0281100	Conserved hypothetical protein. (Os01t0281100-01)
TIP_22132	0,658730159	0,256097561	0.168831	0,088799361	0,088799361	Os03g0385400	Bifunctional inhibitor/plant lipid transfer protein/seed storage domain containing protein. (Os03t0385400-01)
TIP_17967	0,32	0,756097561	0.780822	0,087530516	0,087530516	Os02g0807000	Similar to Phosphoenolpyruvate carboxylase kinase 1. (Os02t0807000-01)
TIP_41822	0,587301587	0,048780488	0.25641	0,085572998	0,085572998	Os06g0257450	Ribonucleotide reductase, Chloroplast biogenesis (Os06t0257450-01)
TIP_40411	0,408	0,768292683	0.894737	0,083328867	0,083328867	Os06g0141166	Similar to hydrolase, NUDIX family protein. (Os06t0141166-00)
TIP_18916	0,166666667	0,87804878	0.0666667	-0,07908456	0,07908456	Os03g0149200	HR-like lesion-inducer family protein. (Os03t0149200-01)
TIP_70451	0,785714286	0,207317073	0.519481	0,078486099	0,078486099	Os11g0539800	Similar to Xaa-Pro aminopeptidase 1. (Os11t0539800-01)
TIP_14341	0,452380952	0,963414634	0.797297	0,076331975	0,076331975	Os02g0532300	Hypothetical conserved gene. (Os02t0532300-01);Alpha/beta hydrolase fold-1 domain containing protein. (Os02t0532300-02)
TIP_34189	0,063492063	0,304878049	0.428571	0,074447769	0,074447769	Os05g0160300	Bifunctional inhibitor/plant lipid transfer protein/seed storage domain containing protein. (Os05t0160300-01)
TIP_24699	0,39516129	0,804878049	0.8	0,074172425	0,074172425	Os03g0673600	Conserved hypothetical protein. (Os03t0673600-01)
TIP_24699	0,39516129	0,804878049	0.8	0,074172425	0,074172425	Os03g0673700	Similar to predicted protein. (Os03t0673700-01)
TIP_54485	0,968253968	0,341463415	0.886076	0,072524454	0,072524454	Os08g0288050	Hypothetical conserved gene. (Os08t0288050-01)
TIP_40517	0,896825397	0,195121951	0.75	0,07251664	0,07251664	Os06g0151900	Phosphofructokinase family protein. (Os06t0151900-01)
TIP_58637	0,52	0,146341463	0.157895	0,069812205	0,069812205	Os09g0256100	Similar to flavonol 4-sulfotransferase. (Os09t0256100-00)
TIP_15294	0,5	0,146341463	0.12987	0,069465915	0,069465915	Os02g0597300	Leucine-rich repeat domain containing protein. (Os02t0597300-01)
TIP_21585	0,6	0,963414634	0.36	-0,068414494	0,068414494	Os03g0345700	Similar to Heavy metal-associated domain containing protein, expressed. (Os03t0345700-01)
TIP_25474	0,531746032	0,109756098	0.173333	0,067784888	0,067784888	Os03g0723600	Conserved hypothetical protein. (Os03t0723600-01);Conserved hypothetical protein. (Os03t0723600-02)
TIP_22139	0,642857143	0,256097561	0.210526	0,066765945	0,066765945	Os03g0386000	Similar to Salt-responsive WD40 protein 5. (Os03t0386000-01);WD40 subfamily protein, Salt stress (Os03t0386000-02)
TIP_8920	0,103174603	0,658536585	0.293333	0,06653566	0,06653566	Os01g0895600	Similar to Calreticulin-3. (Os01t0895600-01)
TIP_70449	0,170731707	0,658536585	0.472973	0,066473422	0,066473422	Os11g0539600	Conserved hypothetical protein. (Os11t0539600-00)
TIP_70897	0,174603175	0,62195122	0.441558	0,062043032	0,062043032	Os11g0602400	tRNA intron endonuclease, catalytic domain-like domain containing protein. (Os11t0602400-01)
TIP_70824	0,603174603	0,048780488	0.342466	0,061707341	0,061707341	Os11g0595200	PAP fibrillin family protein. (Os11t0595200-01)
TIP_66265	0,912698413	0,317073171	0.783784	0,060809726	0,060809726	Os10g0528300	Tau class glutathione S-transferase 4 (Os10t0528300-01)
TIP_66265	0,912698413	0,317073171	0.783784	0,060809726	0,060809726	Os10g0528150	Hypothetical protein. (Os10t0528150-01)
TIP_66265	0,912698413	0,317073171	0.783784	0,060809726	0,060809726	Os10g0528200	Similar to Glutathione S-transferase TSI-1 (EC 2.5.1.18) (Glutathione S- transferase 1). (Os10t0528200-01)
TIP_66265	0,912698413	0,317073171	0.783784	0,060809726	0,060809726	Os10g0528100	Similar to Glutathione S-transferase GST 42 (EC 2.5.1.18) (Fragment). (Os10t0528100-01)
TIP_15293	0,5	0,146341463	0.142857	0,060566832	0,060566832	Os02g0597300	Leucine-rich repeat domain containing protein. (Os02t0597300-01)
TIP_41184	0,880952381	0,536585366	0.618421	0,058136599	0,058136599	Os06g0210200	Peptidase M20 domain containing protein. (Os06t0210200-01)
TIP_22204	0,555555556	0,280487805	0.103896	0,05797196	0,05797196	Os03g0389100	Peptidase C14, caspase catalytic domain containing protein. (Os03t0389100-01)
TIP_68116	0,912698413	0,243902439	0.813333	0,05776482	0,05776482	Os11g0210600	Similar to Alcohol dehydrogenase (Fragment). (Os11t0210600-01)
TIP_3344	0,438016529	0,8875	0.763158	0,05752758	0,05752758	Os01g0348900	Jacalin-related mannose-binding lectin, Salinity tolerance, Resistance to M. oryzae (Os01t0348900-01)
TIP_54140	0,579365079	0,271604938	0.179487	0,055698533	0,055698533	Os08g0250200	ATPase, F1 complex, epsilon subunit, mitochondrial family protein. (Os08t0250200-01)
TIP_59518	0,420634921	0,06097561	0.0921053	0,055087718	0,055087718	Os09g0345300	Similar to Receptor-like serine/threonine kinase. (Os09t0345300-01)
TIP_732	0,896825397	0,353658537	0.714286	0,055006098	0,055006098	Os01g0174900	Thioredoxin fold domain containing protein. (Os01t0174900-01)
TIP_49661	0,325396825	0,048780488	0.597403	-0,054680443	0,054680443	Os07g0469100	Similar to Thylakoid membrane phosphoprotein 14 kDa, chloroplast precursor. (Os07t0469100-01);Similar to Thylakoid membrane phosphoprotein 14 kDa, chloroplast precursor. (Os07t0469100-02)
TIP_67873	0,555555556	0,304878049	0.0921053	0,05344296	0,05344296	Os11g0184900	Similar to OsNAC5 protein [imported]-rice. (Os11t0184900-01);NAC-type transcription factor, Regulation of stress-inducible genes, Stress tolerance (Os11t0184900-02)
TIP_28709	0,436507937	0,780487805	0.168831	-0,052927495	0,052927495	Os04g0338100	Similar to IN2-2 protein. (Os04t0338100-01)
TIP_75782	0,6	0,085365854	0.367089	0,051021595	0,051021595	Os12g0628100	Similar to Actin-depolymerizing factor 6 (ADF-6) (AtADF6). (Os12t0628100-01)
TIP_224	0,285714286	0,06097561	0.626667	-0,048345785	0,048345785	Os01g0122000	Conserved hypothetical protein. (Os01t0122000-01)
TIP_34317	0,531746032	0,841463415	0.276316	-0,048100755	0,048100755	Os05g0170950	Similar to Plastid phosphoenolpyruvate/phosphate translocator. (Os05t0170950-00)
TIP_49904	0,484126984	0,182926829	0.76	-0,046778948	0,046778948	Os07g0486500	RhoGAP domain containing protein. (Os07t0486500-01);RhoGAP domain containing protein. (Os07t0486500-02)
TIP_28587	0,03968254	0,207317073	0.351351	0,046725834	0,046725834	Os04g0307500	Similar to OSIGBa0113B06.2 protein. (Os04t0307500-01)
TIP_40478	0,523809524	0,134146341	0.25974	0,046185012	0,046185012	Os06g0147400	Conserved hypothetical protein. (Os06t0147400-01)
TIP_67485	0,246031746	0,036585366	0.565789	-0,046071443	0,046071443	Os11g0155600	Conserved hypothetical protein. (Os11t0155600-01)
TIP_53269	0,603174603	0,951219512	0.883117	0,046026855	0,046026855	Os08g0158900	GTP1/OBG domain containing protein. (Os08t0158900-01)
TIP_98	0,587301587	0,146341463	0.38961	0,042391875	0,042391875	Os01g0108400	Helix-loop-helix DNA-binding domain containing protein. (Os01t0108400-00)
TIP_27083	0,238095238	0,036585366	0.0649351	0,042070157	0,042070157	Os03g0850400	Similar to Aspartokinase. (Os03t0850400-01)
TIP_10683	0,225806452	0,50617284	0.56	0,041914415	0,041914415	Os02g0162500	Similar to 40S ribosomal protein S14. (Os02t0162500-01)
TIP_10683	0,225806452	0,50617284	0.56	0,041914415	0,041914415	Os02g0162600	Conserved hypothetical protein. (Os02t0162600-01)
TIP_41603	0,444444444	0,802469136	0.226667	-0,040586218	0,040586218	Os06g0239200	Conserved hypothetical protein. (Os06t0239200-00)
TIP_73620	0,388888889	0,707317073	0.194805	-0,040198734	0,040198734	Os12g0420400	Similar to Photosystem I reaction center subunit XI, chloroplast precursor (PSI- L) (PSI subunit V). (Os12t0420400-01);Similar to Photosystem I reaction center subunit XI, chloroplast precursor (PSI- L) (PSI subunit V). (Os12t0420400-02);Similar to Photosystem I reaction center subunit XI, chloroplastic. (Os12t0420400-03)
TIP_44927	0,325396825	0,792682927	0.52	0,039993663	0,039993663	Os06g0623300	NAD(P)-binding domain containing protein. (Os06t0623300-01)
TIP_59781	0,595238095	0,902439024	0.84	0,038450749	0,038450749	Os09g0373000	Similar to Brain protein 44-like protein (PNAS-115). (Os09t0373000-01)
TIP_39760	0,603174603	0,87804878	0.84	0,038208101	0,038208101	Os05g0579800	Similar to Anaphase promoting complex subunit 10 (APC10) (Cyclosome subunit 10). (Os05t0579800-01)
TIP_51480	0,698412698	0,160493827	0.821918	-0,037713764	0,037713764	Os07g0614000	Six-bladed beta-propeller, TolB-like domain containing protein. (Os07t0614000-01);Six-bladed beta-propeller, TolB-like domain containing protein. (Os07t0614000-02)
TIP_67452	0,150793651	0,036585366	0.545455	-0,037567865	0,037567865	Os11g0153800	Similar to Ribosomal protein S25 (40S ribosomal 25S subunit). (Os11t0153800-01)
TIP_67452	0,150793651	0,036585366	0.545455	-0,037567865	0,037567865	Os11g0153700	Chloroplast signal recognition particle 54 kDa protein, Chloroplast development (Os11t0153700-01)
TIP_55217	0,32	0,573170732	0.643836	0,037149708	0,037149708	Os08g0364900	Similar to Pirin-like protein. (Os08t0364900-00)
TIP_67482	0,174603175	0,036585366	0.526316	-0,036540031	0,036540031	Os11g0155600	Conserved hypothetical protein. (Os11t0155600-01)
TIP_1553	0,5	0,271604938	0.786667	-0,036368312	0,036368312	Os01g0223000	Lipase, GDSL domain containing protein. (Os01t0223000-01)
TIP_27073	0,587301587	0,963414634	0.813333	0,035888394	0,035888394	Os03g0849600	COG complex component, COG2 family protein. (Os03t0849600-01)
TIP_55548	0,301587302	0,743902439	0.453333	0,03586925	0,03586925	Os08g0398400	Hypersensitive induced reaction protein, Bacterial pathogen resistance (Os08t0398400-01)
TIP_15928	0,6	0,87804878	0.898734	0,035683779	0,035683779	Os02g0649800	Similar to Cytochrome B5 homolog (Fragment). (Os02t0649800-01)
TIP_27072	0,420634921	0,036585366	0.210526	0,035042701	0,035042701	Os03g0849600	COG complex component, COG2 family protein. (Os03t0849600-01)
TIP_40856	0,301587302	0,45	0.805195	0,034170529	0,034170529	Os06g0184800	Similar to Low-temperature induced protein lt101.1 (Blt101) (Blt101.1). (Os06t0184800-01)
TIP_40856	0,301587302	0,45	0.805195	0,034170529	0,034170529	Os06g0184900	Transferase family protein. (Os06t0184900-01)
TIP_41952	0,69047619	0,195121951	0.792208	-0,033910158	0,033910158	Os06g0268700	Peptidase A1 domain containing protein. (Os06t0268700-01)
TIP_19995	0,452380952	0,219512195	0.105263	0,033593192	0,033593192	Os03g0228500	Conserved hypothetical protein. (Os03t0228500-01)
TIP_53901	0,349206349	0,597560976	0.649351	0,033440496	0,033440496	Os08g0227200	Kelch related domain containing protein. (Os08t0227200-02)
TIP_28586	0,047619048	0,207317073	0.276316	0,033406718	0,033406718	Os04g0307500	Similar to OSIGBa0113B06.2 protein. (Os04t0307500-01)
TIP_54128	0,079365079	0,231707317	0.415584	0,033246796	0,033246796	Os08g0249000	Zinc finger, B-box domain containing protein. (Os08t0249000-01)
TIP_53491	0,104	0,536585366	0.2	0,032198837	0,032198837	Os08g0174100	Similar to transferase family protein. (Os08t0174100-00)
TIP_64743	0,032258065	0,036585366	0.662162	0,031128494	0,031128494	Os10g0409566	Hypothetical gene. (Os10t0409566-01)
TIP_58626	0,777777778	0,914634146	0.973684	0,030808312	0,030808312	Os09g0255400	Similar to Indole-3-glycerol phosphate synthase, chloroplast precursor (EC 4.1.1.48) (IGPS). (Os09t0255400-01);Similar to indole-3-glycerol phosphate synthase. (Os09t0255400-02)
TIP_21209	0,785714286	0,695121951	0.128205	0,030640955	0,030640955	Os03g0319000	Similar to VQ motif family protein, expressed. (Os03t0319000-01)
TIP_41202	0,531746032	0,780487805	0.786667	0,02987579	0,02987579	Os06g0211300	Short-chain dehydrogenase/reductase SDR domain containing protein. (Os06t0211300-01)
TIP_61	0,80952381	0,914634146	0.506494	-0,029578571	0,029578571	Os01g0105900	PfkB carbohydrate kinase protein, Regulation of plant height and leaf structure (Os01t0105900-01)
TIP_68142	0,706349206	0,93902439	0.493333	-0,028911511	0,028911511	Os11g0216100	Similar to Heat shock protein binding protein. (Os11t0216100-01)
TIP_40146	0,571428571	0,426829268	0.935065	-0,027872264	0,027872264	Os06g0115300	Acyl-CoA-binding protein , Stress response (Os06t0115300-01)
TIP_41203	0,523809524	0,780487805	0.753247	0,027825366	0,027825366	Os06g0211300	Short-chain dehydrogenase/reductase SDR domain containing protein. (Os06t0211300-01)
TIP_39336	0,293650794	0,585365854	0.506494	0,027748694	0,027748694	Os05g0546300	Hypothetical protein. (Os05t0546300-01)
TIP_39336	0,293650794	0,585365854	0.506494	0,027748694	0,027748694	Os05g0546500	Similar to Cell death-related protein. (Os05t0546500-00)
TIP_64162	0,088	0,231707317	0.346667	0,02765483	0,02765483	Os10g0368400	Similar to Adapter-related protein complex 4 sigma 1 subunit (Sigma subunit of AP-4) (AP-4 adapter complex sigma subunit). (Os10t0368400-01)
TIP_72335	0,698412698	0,926829268	0.923077	0,027579906	0,027579906	Os12g0174200	Conserved hypothetical protein. (Os12t0174200-01)
TIP_6365	0,912698413	0,963414634	0.946667	0,027245269	0,027245269	Os01g0687300	Conserved hypothetical protein. (Os01t0687300-01);Conserved hypothetical protein. (Os01t0687300-02)
TIP_75535	0,968253968	0,963414634	0.710526	0,027032768	0,027032768	Os12g0612400	Similar to S-locus protein 5 (Fragment). (Os12t0612400-01);Similar to YUP8H12R.35 protein. (Os12t0612400-02)
TIP_40857	0,206349206	0,292682927	0.797297	0,026963518	0,026963518	Os06g0185100	Similar to estradiol 17-beta-dehydrogenase 8. (Os06t0185100-00)
TIP_66841	0,865079365	0,914634146	0.240506	-0,026930214	0,026930214	Os10g0567800	Similar to Dynamin-related protein 1E (Dynamin-like protein E) (Dynamin-like protein 4) (Dynamin-like protein DLP2). (Os10t0567800-01);Similar to predicted protein. (Os10t0567800-02)
TIP_63931	0,333333333	0,207317073	0.0649351	0,026904466	0,026904466	Os10g0343100	Syntaxin 6, N-terminal domain containing protein. (Os10t0343100-01)
TIP_70195	0,301587302	0,036585366	0.155844	0,026837326	0,026837326	Os11g0518900	Conserved hypothetical protein. (Os11t0518900-01);Hypothetical conserved gene. (Os11t0518900-02)
TIP_28710	0,926229508	0,9625	0.931507	0,026823659	0,026823659	Os04g0338100	Similar to IN2-2 protein. (Os04t0338100-01)
TIP_10621	0,768	0,93902439	0.479452	-0,026788696	0,026788696	Os02g0157600	Arsenate (As(V)) reductase, Rhodanase-like protein, As(V) tolerance, Control of arsenic (As) accumulation (Os02t0157600-01);Rhodanese-like domain containing protein (Os02t0157600-02)
TIP_34375	0,967213115	0,8375	0.88	0,026285054	0,026285054	Os05g0177500	UDP-glucuronosyl/UDP-glucosyltransferase family protein. (Os05t0177500-01)
TIP_60	0,166666667	0,085365854	0.538462	-0,02603745	0,02603745	Os01g0105900	PfkB carbohydrate kinase protein, Regulation of plant height and leaf structure (Os01t0105900-01)
TIP_71229	0,69047619	0,914634146	0.933333	0,025957743	0,025957743	Os11g0642800	Glutathione synthetase (Os11t0642800-01)
TIP_40623	0,238095238	0,719512195	0.328767	0,024897587	0,024897587	Os06g0159900	Similar to Arm repeat containing protein. (Os06t0159900-01)
TIP_697	0,634920635	0,951219512	0.776316	0,024629649	0,024629649	Os01g0170900	Conserved hypothetical protein. (Os01t0170900-01)
TIP_28891	0,817460317	0,93902439	0.605263	-0,024288233	0,024288233	Os04g0352400	FK506-binding protein, Peptidyl-prolyl cis/trans isomerase, Chilling tolerance (Os04t0352400-01)
TIP_71298	0,48	0,37804878	0.815789	-0,023914421	0,023914421	Os11g0649300	Hypothetical conserved gene. (Os11t0649300-01)
TIP_40855	0,785714286	0,682926829	0.32	0,023842652	0,023842652	Os06g0184800	Similar to Low-temperature induced protein lt101.1 (Blt101) (Blt101.1). (Os06t0184800-01)
TIP_21091	0,904761905	0,475609756	0.878378	0,023526727	0,023526727	Os03g0310600	Protein of unknown function DUF247, plant family protein. (Os03t0310600-01)
TIP_41602	0,512605042	0,0375	0.578947	-0,02337372	0,02337372	Os06g0239200	Conserved hypothetical protein. (Os06t0239200-00)
TIP_34973	0,887096774	0,926829268	0.973684	0,023218886	0,023218886	Os05g0212400	Similar to Uncharacterized plant-specific domain TIGR01589 family protein. (Os05t0212400-01)
TIP_57089	0,868852459	0,963414634	0.961039	0,022964173	0,022964173	Os08g0504400	Similar to uncharacterized enzyme involved in pigment biosynthesis. (Os08t0504400-01);Similar to Uncharacterized enzyme involved in pigment biosynthesis. (Os08t0504400-02)
TIP_41398	0,825396825	0,268292683	0.894737	-0,022597627	0,022597627	Os06g0225300	Similar to SERK1 (Fragment). (Os06t0225300-01);Similar to SERK1 (Fragment). (Os06t0225300-02)
TIP_10741	0,876033058	0,963414634	0.558442	-0,022537632	0,022537632	Os02g0166600	Hypothetical protein. (Os02t0166600-01)
TIP_41399	0,817460317	0,280487805	0.871795	-0,022452513	0,022452513	Os06g0225300	Similar to SERK1 (Fragment). (Os06t0225300-01);Similar to SERK1 (Fragment). (Os06t0225300-02)
TIP_173	0,658730159	0,426829268	0.473684	0,022387674	0,022387674	Os01g0117900	Similar to nodulin-like protein. (Os01t0117900-01);Similar to Nodulin-like protein 5NG4. (Os01t0117900-02);Similar to nodulin-like protein. (Os01t0117900-03)
TIP_75787	0,756097561	0,93902439	0.959459	0,021522482	0,021522482	Os12g0630100	Thaumatin protein, Tolerance to nitrogen deficiency (Os12t0630100-01)
TIP_30360	0,96031746	0,963414634	0.883117	-0,021484947	0,021484947	Os04g0460300	Amino acid transporter, transmembrane domain containing protein. (Os04t0460300-01)
TIP_15685	0,063492063	0,219512195	0.150685	0,020708045	0,020708045	Os02g0629200	Similar to cDNA clone:001-039-E03, full insert sequence. (Os02t0629200-01);PLASMA MEMBRANE INTRINSIC PROTEIN (PIP) family of aquaporin, Water-transporting facilitator across cell membranes, Maintenance of the cell membrane integrity, Drought tolerance (Os02t0629200-02)
TIP_6620	0,19047619	0,06097561	0.0533333	0,02051359	0,02051359	Os01g0705200	Late embryogenesis abundant protein repeat containing protein. (Os01t0705200-01)
TIP_58683	0,944444444	0,914634146	0.846154	0,020483133	0,020483133	Os09g0261100	Cyclin-like F-box domain containing protein. (Os09t0261100-01)
TIP_34153	0,851239669	0,93902439	0.973333	0,020451232	0,020451232	Os05g0158500	Serine carboxypeptidase, Positive regulator of grain size (Os05t0158500-01)
TIP_71960	0,857142857	0,93902439	0.973684	0,020451232	0,020451232	Os12g0150200	Cytochrome P450 enzyme, Salt tolerance (Os12t0150200-01)
TIP_14196	0,96031746	0,963414634	0.844156	-0,020412648	0,020412648	Os02g0522700	Hypothetical conserved gene. (Os02t0522700-01)
TIP_26475	0,944444444	0,951219512	0.947368	0,020264536	0,020264536	Os03g0796400	EMSY N-terminal domain containing protein. (Os03t0796400-01)
TIP_57087	0,642857143	0,951219512	0.532468	-0,019730403	0,019730403	Os08g0504400	Similar to uncharacterized enzyme involved in pigment biosynthesis. (Os08t0504400-01);Similar to Uncharacterized enzyme involved in pigment biosynthesis. (Os08t0504400-02)
TIP_542	0,285714286	0,390243902	0.08	-0,019676179	0,019676179	Os01g0152700	Similar to Histone H2B (CaH2B). (Os01t0152700-01)
TIP_33873	0,952380952	0,902439024	0.792208	0,019597925	0,019597925	Os05g0130200	Conserved hypothetical protein. (Os05t0130200-01)
TIP_62634	0,793650794	0,731707317	0.217949	0,019450505	0,019450505	Os10g0112700	Serine/threonine protein kinase-related domain containing protein. (Os10t0112700-01)
TIP_66783	0,928571429	0,87804878	0.833333	0,019341774	0,019341774	Os10g0564150	Hypothetical gene. (Os10t0564150-00)
TIP_67392	0,072580645	0,792682927	0.08	0,019233676	0,019233676	Os11g0150800	Hypothetical protein. (Os11t0150800-01)
TIP_59683	0,920634921	0,951219512	0.96	0,018969037	0,018969037	Os09g0367900	Conserved hypothetical protein. (Os09t0367900-01);Hypothetical conserved gene. (Os09t0367900-02)
TIP_26869	0,714285714	0,902439024	0.935065	0,018875191	0,018875191	Os03g0829100	Similar to Soluble epoxide hydrolase. (Os03t0829100-01);Similar to epoxide hydrolase 2. (Os03t0829100-02)
TIP_40181	0,904761905	0,463414634	0.871795	0,018588396	0,018588396	Os06g0124900	Conserved hypothetical protein. (Os06t0124900-01)
TIP_9722	0,428571429	0,280487805	0.192308	0,018495375	0,018495375	Os01g0954000	NADPH-dependent FMN reductase family protein. (Os01t0954000-01)
TIP_40073	0,920634921	0,926829268	0.805195	-0,018079516	0,018079516	Os06g0109200	Protein of unknown function DUF6, transmembrane domain containing protein. (Os06t0109200-01)
TIP_20989	0,916666667	0,962962963	0.986667	-0,017506018	0,017506018	Os03g0301800	Similar to Kinesin-like polypeptides 9 (Fragment). (Os03t0301800-01)
TIP_2027	0,26984127	0,036585366	0.135135	0,017341931	0,017341931	Os01g0250900	HAD superfamily (subfamily IG) hydrolase, 5'-Nucleotidase protein. (Os01t0250900-01)
TIP_57065	0,428571429	0,536585366	0.173333	-0,016896585	0,016896585	Os08g0503200	PLC-like phosphodiesterase, TIM beta/alpha-barrel domain domain containing protein. (Os08t0503200-01)
TIP_45761	0,968253968	0,963414634	0.896104	0,016831669	0,016831669	Os06g0672700	Conserved hypothetical protein. (Os06t0672700-01)
TIP_41572	0,317460317	0,158536585	0.481013	-0,016286741	0,016286741	Os06g0236266	Conserved hypothetical protein. (Os06t0236266-01)
TIP_41572	0,317460317	0,158536585	0.481013	-0,016286741	0,016286741	Os06g0236300	Conserved hypothetical protein. (Os06t0236300-01)
TIP_49092	0,936507937	0,402439024	0.935065	0,016282326	0,016282326	Os07g0412100	Similar to Granule-bound starch synthase Ib, chloroplast precursor (EC 2.4.1.21) (Fragment). (Os07t0412100-01);Granule-bound starch synthase 2, Starch biosynthesis (Os07t0412100-02)
TIP_12800	0,827868852	0,926829268	0.972973	0,016273971	0,016273971	Os02g0318600	Similar to PDR-like ABC transporter. (Os02t0318600-00)
TIP_37375	0,579365079	0,341463415	0.697368	-0,015879852	0,015879852	Os05g0404400	Similar to RPH1 (RESISTANCE TO PHYTOPHTHORA 1). (Os05t0404400-01);Similar to RPH1 (RESISTANCE TO PHYTOPHTHORA 1). (Os05t0404400-02)
TIP_41205	0,523809524	0,780487805	0.69863	0,015758526	0,015758526	Os06g0211300	Short-chain dehydrogenase/reductase SDR domain containing protein. (Os06t0211300-01)
TIP_52047	0,754098361	0,864197531	0.894737	0,015488911	0,015488911	Os07g0661600	Similar to RNA-binding protein-like protein. (Os07t0661600-01);Similar to RNA-binding protein. (Os07t0661600-03)
TIP_8791	0,714285714	0,829268293	0.866667	0,015469478	0,015469478	Os01g0885000	Similar to Cytochrome c. (Os01t0885000-01);Similar to Cytochrome c. (Os01t0885000-02)
TIP_34206	0,595238095	0,756097561	0.815789	0,014910907	0,014910907	Os05g0161800	Calcium-activated (p)ppGpp synthetase, Ca<sup>2+</sup>-activated RelA-SpoT homolog 3 (Os05t0161800-01)
TIP_53493	0,888888889	0,426829268	0.84	0,014734273	0,014734273	Os08g0174100	Similar to transferase family protein. (Os08t0174100-00)
TIP_52722	0,569105691	0,888888889	0.648649	0,014701797	0,014701797	Os08g0114100	Green tissues expressed protein (Os08t0114100-01)
TIP_34204	0,349206349	0,170731707	0.213333	0,014685174	0,014685174	Os05g0161500	Calcium-activated (p)ppGpp synthetase, Ca<sup>2+</sup>-activated RelA-SpoT homolog 2 (Os05t0161500-01)
TIP_11491	0,714285714	0,87654321	0.946667	0,014603504	0,014603504	Os02g0212300	Conserved hypothetical protein. (Os02t0212300-00)
TIP_30161	0,285714286	0,951219512	0.333333	0,0142794	0,0142794	Os04g0444800	Ferric reductase oxidase, Fe homeostasis, Salt stress response (Os04t0444800-01);Ferric reductase-like transmembrane component family protein. (Os04t0444800-02)
TIP_52496	0,158730159	0,292682927	0.0657895	-0,013917925	0,013917925	Os07g0693000	Similar to Ser-thr protein kinase (Fragment). (Os07t0693000-01)
TIP_11580	0,272	0,609756098	0.220779	-0,013699181	0,013699181	Os02g0223700	Protein of unknown function DUF3511 domain containing protein. (Os02t0223700-01)
TIP_11285	0,409836066	0,097560976	0.493506	-0,013682227	0,013682227	Os02g0197200	Mlo-related protein family protein. (Os02t0197200-01)
TIP_3391	0,69047619	0,890243902	0.780822	0,013617109	0,013617109	Os01g0352100	2OG-Fe(II) oxygenase domain containing protein. (Os01t0352100-01)
TIP_49305	0,912698413	0,962962963	0.947368	0,013485267	0,013485267	Os07g0438500	Octicosapeptide/Phox/Bem1p domain containing protein. (Os07t0438500-01)
TIP_41394	0,857142857	0,902439024	0.947368	0,013474347	0,013474347	Os06g0224900	Mitochodrial transcription termination factor-related family protein. (Os06t0224900-01);Mitochodrial transcription termination factor-related family protein. (Os06t0224900-02)
TIP_33760	0,856	0,890243902	0.947368	0,013434922	0,013434922	Os05g0122800	Tetraspanin domain containing protein. (Os05t0122800-01);Similar to senescence-associated protein. (Os05t0122800-02);Tetraspanin domain containing protein. (Os05t0122800-03)
TIP_31267	0,857142857	0,902439024	0.973684	0,013386047	0,013386047	Os04g0530300	Similar to OSIGBa0155K17.11 protein. (Os04t0530300-01)
TIP_72681	0,76984127	0,951219512	0.866667	0,013042162	0,013042162	Os12g0209700	Hypothetical conserved gene. (Os12t0209700-01)
TIP_3320	0,792	0,841463415	0.573333	-0,012928672	0,012928672	Os01g0343300	GATA transcription factor, Tolerance to abiotic stresses (salinity, drought, and ABA), Seed development (Os01t0343300-01)
TIP_73851	0,556451613	0,682926829	0.958904	0,012912812	0,012912812	Os12g0441700	Conserved hypothetical protein. (Os12t0441700-01)
TIP_66416	0,912698413	0,951219512	0.864865	-0,012909223	0,012909223	Os10g0540100	Pentatricopeptide repeat domain containing protein. (Os10t0540100-01)
TIP_67451	0,880952381	0,963414634	0.783784	-0,012492986	0,012492986	Os11g0153700	Chloroplast signal recognition particle 54 kDa protein, Chloroplast development (Os11t0153700-01)
TIP_382	0,206349206	0,06097561	0.32	-0,012191234	0,012191234	Os01g0136400	Protein kinase, core domain containing protein. (Os01t0136400-01)
TIP_60450	0,672131148	0,841463415	0.546667	-0,011984976	0,011984976	Os09g0422000	Transferase family protein. (Os09t0422000-01)
TIP_61821	0,943548387	0,938271605	0.945205	0,011606569	0,011606569	Os09g0518200	UDP:glucose salicylic acid glucosyltransferase, Chemically-induced disease resistance (Os09t0518200-01)
TIP_53770	0,357142857	0,048780488	0.38961	-0,01155467	0,01155467	Os08g0203300	Similar to SHR5-receptor-like kinase (Fragment). (Os08t0203300-01)
TIP_32311	0,857142857	0,853658537	0.851351	0,01153835	0,01153835	Os04g0606000	Transferase family protein. (Os04t0606000-01)
TIP_41953	0,293650794	0,756097561	0.223684	-0,011326588	0,011326588	Os06g0268700	Peptidase A1 domain containing protein. (Os06t0268700-01)
TIP_58942	0,688	0,890243902	0.733333	0,010976923	0,010976923	Os09g0287500	Protein of unknown function DUF565 family protein. (Os09t0287500-01)
TIP_31938	0,857142857	0,890243902	0.88	0,010772783	0,010772783	Os04g0578200	Similar to H0404F02.9 protein. (Os04t0578200-01)
TIP_3334	0,552	0,817073171	0.447368	-0,010734384	0,010734384	Os01g0347100	Protein of unknown function DUF1399 family protein. (Os01t0347100-01)
TIP_25335	0,741666667	0,963414634	0.890411	0,010531177	0,010531177	Os03g0714400	Similar to ATP binding protein. (Os03t0714400-01)
TIP_58320	0,841269841	0,914634146	0.947368	0,010322736	0,010322736	Os09g0125900	Similar to PDR15 ABC transporter. (Os09t0125900-01)
TIP_27382	0,666666667	0,731707317	0.266667	-0,009892699	0,009892699	Os04g0117900	Amidase family protein. (Os04t0117900-01)
TIP_32236	0,952380952	0,914634146	0.960526	-0,009796452	0,009796452	Os04g0600000	Similar to Transfactor-like protein. (Os04t0600000-01)
TIP_9723	0,119047619	0,06097561	0.0897436	-0,009713397	0,009713397	Os01g0954000	NADPH-dependent FMN reductase family protein. (Os01t0954000-01)
TIP_233	0,753968254	0,913580247	0.857143	0,009544031	0,009544031	Os01g0123900	Similar to Bowman-Birk type proteinase inhibitor (EBI). (Os01t0123900-01)
TIP_5217	0,952380952	0,914634146	0.906667	0,00943968	0,00943968	Os01g0607900	Serine/threonine protein kinase-related domain containing protein. (Os01t0607900-01)
TIP_44215	0,96	0,896103896	0.92	0,009258664	0,009258664	Os06g0563000	Ndr family protein. (Os06t0563000-01)
TIP_61815	0,928571429	0,926829268	0.906667	-0,009226124	0,009226124	Os09g0518200	UDP:glucose salicylic acid glucosyltransferase, Chemically-induced disease resistance (Os09t0518200-01)
TIP_68017	0,152	0,707317073	0.162162	0,009147628	0,009147628	Os11g0202300	Cyclin-like F-box domain containing protein. (Os11t0202300-01);Similar to F-box domain containing protein, expressed. (Os11t0202300-02)
TIP_74638	0,111111111	0,073170732	0.0506329	-0,008970253	0,008970253	Os12g0538600	Thioredoxin fold domain containing protein. (Os12t0538600-00)
TIP_52054	0,801652893	0,804878049	0.986667	-0,008702081	0,008702081	Os07g0662800	Similar to tryptophan/tyrosine permease family protein. (Os07t0662800-01)
TIP_26711	0,76984127	0,93902439	0.896104	0,008701603	0,008701603	Os03g0815900	Similar to DNA-directed RNA polymerase. (Os03t0815900-01)
TIP_2351	0,912698413	0,93902439	0.959459	0,00862907	0,00862907	Os01g0274100	Similar to disulfide oxidoreductase/ monooxygenase/ oxidoreductase. (Os01t0274100-00)
TIP_306	0,785714286	0,926829268	0.906667	0,008596198	0,008596198	Os01g0130200	Hypothetical conserved gene. (Os01t0130200-00)
TIP_12553	0,793650794	0,865853659	0.705128	-0,008595764	0,008595764	Os02g0299300	Similar to cDNA clone:J023112L03, full insert sequence. (Os02t0299300-01)
TIP_72680	0,793650794	0,951219512	0.90411	0,008487876	0,008487876	Os12g0209700	Hypothetical conserved gene. (Os12t0209700-01)
TIP_18083	0,832	0,87804878	0.776316	-0,008384371	0,008384371	Os02g0816600	Similar to ABC(yeast) homolog1. (Os02t0816600-01);Similar to ABC1 family protein. (Os02t0816600-02)
TIP_32314	0,849206349	0,853658537	0.828947	-0,008382999	0,008382999	Os04g0606000	Transferase family protein. (Os04t0606000-01)
TIP_56748	0,944444444	0,926829268	0.946667	0,008170204	0,008170204	Os08g0480100	Signal recognition particle receptor, alpha subunit, N-terminal domain containing protein. (Os08t0480100-01);Similar to predicted protein. (Os08t0480100-02)
TIP_73356	0,841269841	0,963414634	0.733333	-0,007829673	0,007829673	Os12g0288400	Similar to Ubiquitin ligase protein mib (EC 6.3.2.-) (Mind bomb protein). (Os12t0288400-01)
TIP_543	0,682539683	0,597560976	0.896104	-0,007733172	0,007733172	Os01g0152700	Similar to Histone H2B (CaH2B). (Os01t0152700-01)
TIP_543	0,682539683	0,597560976	0.896104	-0,007733172	0,007733172	Os01g0152900	Similar to Histone H2B.1. (Os01t0152900-00)
TIP_74525	0,515873016	0,543209877	0.116883	-0,007528871	0,007528871	Os12g0527301	Hypothetical gene. (Os12t0527301-00)
TIP_32759	0,523809524	0,414634146	0.64	-0,007526413	0,007526413	Os04g0640800	Programmed cell death protein 2, C-terminal domain containing protein. (Os04t0640800-01)
TIP_41250	0,404761905	0,353658537	0.171053	0,007415619	0,007415619	Os06g0215900	Similar to Oxo-phytodienoic acid reductase. (Os06t0215900-01);Similar to 12-oxophytodienoic acid reductase. (Os06t0215900-02)
TIP_70525	0,317460317	0,048780488	0.263158	0,007392939	0,007392939	Os11g0546300	Patatin family protein. (Os11t0546300-01)
TIP_11952	0,936507937	0,926829268	0.857143	0,007236992	0,007236992	Os02g0251900	Similar to Tobacco rattle virus-induced protein variant 2. (Os02t0251900-01)
TIP_25578	0,857142857	0,914634146	0.961039	0,00722856	0,00722856	Os03g0728600	Conserved hypothetical protein. (Os03t0728600-01)
TIP_72683	0,80952381	0,817073171	0.802632	-0,007104809	0,007104809	Os12g0210200	Zeta class glutathione transferase (Os12t0210200-01)
TIP_72683	0,80952381	0,817073171	0.802632	-0,007104809	0,007104809	Os12g0210300	Zeta class glutathione transferase, Cold tolerance (Os12t0210300-01)
TIP_51997	0,714285714	0,804878049	0.844156	0,00704796	0,00704796	Os07g0657600	Hypothetical conserved gene. (Os07t0657600-01)
TIP_39460	0,968253968	0,93902439	0.88	0,007019641	0,007019641	Os05g0556700	Similar to Cct2-prov protein. (Os05t0556700-01)
TIP_30263	0,888888889	0,87804878	0.87013	-0,00695095	0,00695095	Os04g0452000	Similar to H0815C01.7 protein. (Os04t0452000-01)
TIP_27404	0,119047619	0,320987654	0.0666667	-0,006741295	0,006741295	Os04g0121100	Similar to OSIGBa0115D20.4 protein. (Os04t0121100-01)
TIP_49883	0,880952381	0,804878049	0.934211	-0,006735366	0,006735366	Os07g0484800	Similar to Adenine phosphoribosyltransferase (EC 2.4.2.7)-like protein. (Os07t0484800-01)
TIP_583	0,904761905	0,93902439	0.986667	0,006670046	0,006670046	Os01g0158900	Zinc finger, NF-X1-type domain containing protein. (Os01t0158900-01);Hypothetical conserved gene. (Os01t0158900-02)
TIP_32658	0,253968254	0,219512195	0.631579	-0,006527446	0,006527446	Os04g0630400	NAD(P)-binding domain containing protein. (Os04t0630400-01)
TIP_32658	0,253968254	0,219512195	0.631579	-0,006527446	0,006527446	Os04g0630300	NAD(P)-binding domain containing protein. (Os04t0630300-01)
TIP_34323	0,80952381	0,963414634	0.723684	-0,006422377	0,006422377	Os05g0171200	Embryo-specific 3 family protein. (Os05t0171200-01)
TIP_51011	0,071428571	0,097560976	0.207792	0,006396441	0,006396441	Os07g0575600	Similar to Lectin receptor-type kinase. (Os07t0575600-01);Similar to Lectin-like receptor kinase 7;2. (Os07t0575600-02)
TIP_67453	0,849206349	0,951219512	0.826667	-0,006395745	0,006395745	Os11g0153800	Similar to Ribosomal protein S25 (40S ribosomal 25S subunit). (Os11t0153800-01)
TIP_53439	0,325396825	0,195121951	0.181818	0,006387658	0,006387658	Os08g0169800	HAD-superfamily hydrolase, subfamily IA, REG-2-like domain containing protein. (Os08t0169800-01)
TIP_9781	0,944444444	0,93902439	0.88	0,006291916	0,006291916	Os01g0957200	Protein of unknown function DUF3411 domain containing protein. (Os01t0957200-01)
TIP_62416	0,80952381	0,817073171	0.779221	-0,006277161	0,006277161	Os09g0565250	Hypothetical gene. (Os09t0565250-00)
TIP_27793	0,896825397	0,780487805	0.84	-0,006173988	0,006173988	Os04g0188433	Similar to OSIGBa0102N07.2 protein. (Os04t0188433-01)
TIP_39334	0,301587302	0,219512195	0.179487	0,005923049	0,005923049	Os05g0546300	Hypothetical protein. (Os05t0546300-01)
TIP_39334	0,301587302	0,219512195	0.179487	0,005923049	0,005923049	Os05g0546500	Similar to Cell death-related protein. (Os05t0546500-00)
TIP_64409	0,936507937	0,938271605	0.894737	-0,005824698	0,005824698	Os10g0389300	Similar to Red chlorophyll catabolite reductase (Fragment). (Os10t0389300-01);Red chlorophyll catabolite reductase (Os10t0389300-02)
TIP_32312	0,150793651	0,146341463	0.181818	-0,005813024	0,005813024	Os04g0606000	Transferase family protein. (Os04t0606000-01)
TIP_39690	0,896825397	0,93902439	0.946667	0,005723491	0,005723491	Os05g0574400	Similar to Malate dehydrogenase. (Os05t0574400-01)
TIP_69223	0,865079365	0,902439024	0.922078	0,005714514	0,005714514	Os11g0417300	Hypothetical gene. (Os11t0417300-01);Conserved hypothetical protein. (Os11t0417300-02)
TIP_57311	0,857142857	0,902439024	0.831169	0,005510471	0,005510471	Os08g0519400	Apolipoprotein/apolipophorin domain containing protein. (Os08t0519400-01)
TIP_72767	0,214285714	0,097560976	0.106667	0,005466483	0,005466483	Os12g0230100	Similar to ATP-dependent Clp protease ATP-binding subunit clpA homolog, chloroplast precursor (Fragment). (Os12t0230100-01)
TIP_61386	0,901639344	0,9125	0.934211	-0,005370812	0,005370812	Os09g0482780	FAS1 domain domain containing protein. (Os09t0482780-01)
TIP_44242	0,904761905	0,914634146	0.881579	0,00527041	0,00527041	Os06g0564700	Similar to Cysteine synthase (EC 4.2.99.8). (Os06t0564700-01)
TIP_483	0,571428571	0,451219512	0.506494	0,005243055	0,005243055	Os01g0147700	Region of unknown function XH domain containing protein. (Os01t0147700-01)
TIP_11564	0,293650794	0,62195122	0.32	0,005182204	0,005182204	Os02g0222100	Similar to Cysteine synthase (EC 4.2.99.8). (Os02t0222100-01)
TIP_15414	0,896825397	0,902439024	0.986486	0,00512623	0,00512623	Os02g0608600	Amino acid-binding ACT domain containing protein. (Os02t0608600-01)
TIP_2336	0,912698413	0,951219512	0.960526	0,004972436	0,004972436	Os01g0273500	Heat shock protein DnaJ, N-terminal domain containing protein. (Os01t0273500-01)
TIP_65865	0,087301587	0,170731707	0.038961	-0,004972124	0,004972124	Os10g0498200	Epoxide hydrolase family protein. (Os10t0498200-01)
TIP_33623	0,857142857	0,841463415	0.631579	0,004699759	0,004699759	Os05g0113400	Similar to Actin-depolymerizing factor 2 (ADF 2). (Os05t0113400-01)
TIP_71080	0,293650794	0,304878049	0.74359	0,004676028	0,004676028	Os11g0630300	Conserved hypothetical protein. (Os11t0630300-01)
TIP_45877	0,920634921	0,951219512	0.973333	0,004658146	0,004658146	Os06g0680900	Similar to predicted protein. (Os06t0680900-01);Exostosin-like family protein. (Os06t0680900-02)
TIP_32677	0,808	0,746835443	0.520548	0,004637321	0,004637321	Os04g0632500	S-Domain receptor like kinase-30 (Os04t0632500-00)
TIP_39745	0,92	0,93902439	0.973333	-0,004436521	0,004436521	Os05g0578500	NAD(P)-binding domain containing protein. (Os05t0578500-01)
TIP_19536	0,095238095	0,134146341	0.207792	0,004419523	0,004419523	Os03g0195450	Similar to sulfate/bicarbonate/oxalate exchanger and transporter sat-1. (Os03t0195450-00)
TIP_61872	0,873015873	0,902439024	0.792208	-0,004294961	0,004294961	Os09g0523200	Hypothetical conserved gene. (Os09t0523200-00)
TIP_40524	0,746031746	0,963414634	0.736842	-0,004293083	0,004293083	Os06g0152600	Hypothetical gene. (Os06t0152600-01)
TIP_9780	0,936507937	0,902439024	0.87013	-0,004265561	0,004265561	Os01g0957200	Protein of unknown function DUF3411 domain containing protein. (Os01t0957200-01)
TIP_41951	0,317460317	0,804878049	0.276316	-0,004081077	0,004081077	Os06g0268700	Peptidase A1 domain containing protein. (Os06t0268700-01)
TIP_32047	0,055555556	0,158536585	0.0526316	0,003944256	0,003944256	Os04g0585200	Similar to Glutamate receptor. (Os04t0585200-01);Similar to Glutamate receptor 3.1. (Os04t0585200-02)
TIP_39693	0,920634921	0,890243902	0.868421	0,003719924	0,003719924	Os05g0574800	Hypothetical conserved gene. (Os05t0574800-00)
TIP_35339	0,880952381	0,914634146	0.934211	-0,003663676	0,003663676	Os05g0239350	Hypothetical gene. (Os05t0239350-01)
TIP_64159	0,626984127	0,707317073	0.808219	0,003533235	0,003533235	Os10g0365800	Protein of unknown function DUF3615 domain containing protein. (Os10t0365800-01)
TIP_25330	0,722222222	0,890243902	0.766234	0,003517328	0,003517328	Os03g0714400	Similar to ATP binding protein. (Os03t0714400-01)
TIP_44590	0,865079365	0,890243902	0.896104	0,003488328	0,003488328	Os06g0603400	Similar to DNA-directed RNA polymerase III 39 kDa polypeptide (EC 2.7.7.6) (RNA polymerase III C39 subunit). (Os06t0603400-01);Similar to RNA polymerase Rpc34 subunit family protein. (Os06t0603400-02)
TIP_67371	0,841269841	0,902439024	0.96	-0,003174385	0,003174385	Os11g0148200	Similar to predicted protein. (Os11t0148200-01)
TIP_15335	0,047619048	0,048780488	0.184211	0,003011157	0,003011157	Os02g0601700	Ankyrin repeat containing protein. (Os02t0601700-01)
TIP_10742	0,861788618	0,950617284	0.849315	0,002945182	0,002945182	Os02g0166600	Hypothetical protein. (Os02t0166600-01)
TIP_27791	0,753968254	0,524390244	0.75	0,002884143	0,002884143	Os04g0188433	Similar to OSIGBa0102N07.2 protein. (Os04t0188433-01)
TIP_64440	0,825396825	0,829268293	0.545455	-0,002862099	0,002862099	Os10g0391400	Jasmonate ZIM-domain (JAZ) protein, TIFY family protein, Negative regulation of JA signal transduction pathway, Activation of hypersensitive cell death (Os10t0391400-01)
TIP_17940	0,912698413	0,93902439	0.881579	-0,002672512	0,002672512	Os02g0805800	Aminoglycoside phosphotransferase domain containing protein. (Os02t0805800-01);Similar to cDNA clone:J013094E21, full insert sequence. (Os02t0805800-02)
TIP_71470	0,047619048	0,073170732	0.142857	0,002621528	0,002621528	Os11g0703100	Thaumatin, pathogenesis-related family protein. (Os11t0703100-01)
TIP_27472	0,96031746	0,731707317	0.946667	0,002613157	0,002613157	Os04g0136900	Similar to OSIGBa0147B06.6 protein. (Os04t0136900-01)
TIP_1657	0,904761905	0,768292683	0.945205	0,002377359	0,002377359	Os01g0227400	Similar to Cytochrome P450 71A1 (EC 1.14.-.-) (CYPLXXIA1) (ARP-2). (Os01t0227400-01)
TIP_7526	0,896	0,938271605	0.961039	-0,002317109	0,002317109	Os01g0777700	Similar to acid phosphatase/ oxidoreductase/ transition metal ion binding. (Os01t0777700-00)
TIP_4829	0,650793651	0,817073171	0.571429	-0,002296701	0,002296701	Os01g0580000	Esterase/lipase/thioesterase domain containing protein. (Os01t0580000-01);Similar to esterase. (Os01t0580000-02)
TIP_50989	0,587301587	0,695121951	0.480519	-0,002233105	0,002233105	Os07g0573800	Similar to root border cell-specific protein. (Os07t0573800-01);FMN-binding split barrel domain containing protein. (Os07t0573800-02);FMN-binding split barrel domain containing protein. (Os07t0573800-03);Hypothetical protein. (Os07t0573800-04)
TIP_544	0,301587302	0,414634146	0.418919	0,002187942	0,002187942	Os01g0152900	Similar to Histone H2B.1. (Os01t0152900-00)
TIP_55649	0,222222222	0,036585366	0.0909091	0,002152975	0,002152975	Os08g0406400	Similar to Sulfate transporter (Fragment). (Os08t0406400-01)
TIP_45600	0,912698413	0,914634146	0.831169	0,002015822	0,002015822	Os06g0664000	Hypothetical gene. (Os06t0664000-01)
TIP_75463	0,873015873	0,926829268	0.776316	0,001967222	0,001967222	Os12g0606100	Hypothetical conserved gene. (Os12t0606100-00)
TIP_6050	0,801587302	0,853658537	0.921053	0,001851625	0,001851625	Os01g0664000	Similar to carboxyl-terminal-processing protease. (Os01t0664000-00)
TIP_65	0,801587302	0,914634146	0.818182	-0,001787705	0,001787705	Os01g0105900	PfkB carbohydrate kinase protein, Regulation of plant height and leaf structure (Os01t0105900-01)
TIP_55352	0,222222222	0,243902439	0.324675	0,001741973	0,001741973	Os08g0379000	RNA-processing protein, HAT helix domain containing protein. (Os08t0379000-01)
TIP_55352	0,222222222	0,243902439	0.324675	0,001741973	0,001741973	Os08g0378900	Similar to Thioredoxin protein. (Os08t0378900-01);Subunit of PEP (Plastid-encoded RNA polymerase) in chloroplasts, Chloroplast development (Os08t0378900-02)
TIP_48581	0,849206349	0,914634146	0.921053	-0,001733497	0,001733497	Os07g0258800	Conserved hypothetical protein. (Os07t0258800-00)
TIP_41765	0,46031746	0,195121951	0.426667	-0,001652254	0,001652254	Os06g0254600	Caleosin related family protein. (Os06t0254600-01)
TIP_63115	0,952380952	0,93902439	0.802632	-0,001632303	0,001632303	Os10g0162834	Thioredoxin-like fold domain containing protein. (Os10t0162834-01)
TIP_13275	0,857142857	0,804878049	0.986842	-0,001594753	0,001594753	Os02g0457250	Hypothetical gene. (Os02t0457250-00)
TIP_27406	0,150793651	0,390243902	0.205479	0,001541634	0,001541634	Os04g0121100	Similar to OSIGBa0115D20.4 protein. (Os04t0121100-01)
TIP_45763	0,182539683	0,182926829	0.205128	0,001525376	0,001525376	Os06g0672700	Conserved hypothetical protein. (Os06t0672700-01)
TIP_5350	0,806451613	0,914634146	0.946667	0,001525376	0,001525376	Os01g0616400	Similar to Floral homeotic protein HUA1. (Os01t0616400-01);Hypothetical conserved gene. (Os01t0616400-02)
TIP_44438	0,857142857	0,780487805	0.866667	-0,001261525	0,001261525	Os06g0589500	Conserved hypothetical protein. (Os06t0589500-01)
TIP_63	0,174603175	0,085365854	0.226667	-0,001125089	0,001125089	Os01g0105900	PfkB carbohydrate kinase protein, Regulation of plant height and leaf structure (Os01t0105900-01)
TIP_19754	0,817460317	0,756097561	0.881579	0,001085361	0,001085361	Os03g0211100	Zinc finger, RING/FYVE/PHD-type domain containing protein. (Os03t0211100-01)
TIP_9856	0,76984127	0,93902439	0.746667	0,000951111	0,000951111	Os01g0965900	Conserved hypothetical protein. (Os01t0965900-01)
TIP_536	0,373015873	0,353658537	0.266667	0,000914767	0,000914767	Os01g0151400	Similar to Gamma-glutamyl transferase. (Os01t0151400-01)
TIP_28807	0,592	0,451219512	0.584416	0,000888129	0,000888129	Os04g0347600	Tetratricopeptide-like helical domain containing protein. (Os04t0347600-01)
TIP_46431	0,746031746	0,914634146	0.831169	0,000854215	0,000854215	Os06g0729150	Hypothetical protein. (Os06t0729150-00)
TIP_9923	0,865079365	0,914634146	0.868421	0,000698255	0,000698255	Os01g0973500	Receptor-like cytoplasmic kinase, Positive regulation of chitin- and PGN induced immunity, Positive regulation of the development of tillers and panicle secondary branching (Os01t0973500-01)
TIP_64322	0,214285714	0,197530864	0.0945946	-0,000672269	0,000672269	Os10g0378100	Similar to Cytochrome P450 family protein, expressed. (Os10t0378100-01)
TIP_1586	0,111111111	0,243902439	0.105263	-0,000659688	0,000659688	Os01g0224166	Hypothetical gene. (Os01t0224166-00)
TIP_15113	0,912698413	0,914634146	0.842105	0,000654387	0,000654387	Os02g0585200	Heavy metal transport/detoxification protein domain containing protein. (Os02t0585200-01)
TIP_34277	0,856	0,9125	0.96	0,000625282	0,000625282	Os05g0166450	Hypothetical gene. (Os05t0166450-01)
TIP_9857	0,785714286	0,93902439	0.8	0,000582809	0,000582809	Os01g0965900	Conserved hypothetical protein. (Os01t0965900-01)
TIP_7833	0,888888889	0,963414634	0.986667	-0,000412232	0,000412232	Os01g0808100	Similar to BZIP transcription factor. (Os01t0808100-01);TGA transcription factor, bZIP transcription factor, Resistance against bacterial blight disease (Os01t0808100-02)
TIP_24227	0,722222222	0,951219512	0.766234	0,000336338	0,000336338	Os03g0644200	Pentatricopeptide repeat domain containing protein. (Os03t0644200-01)
TIP_66449	0,753968254	0,780487805	0.540541	-0,000291718	0,000291718	Os10g0542266	Hypothetical gene. (Os10t0542266-00)
TIP_168	0,753968254	0,65	0.766234	-0,000246316	0,000246316	Os01g0116900	Protein kinase, catalytic domain domain containing protein. (Os01t0116900-00)
TIP_34850	0,817460317	0,890243902	0.986842	0,000239465	0,000239465	Os05g0205000	Similar to NOD26-like membrane integral protein ZmNIP1-1. (Os05t0205000-01)
TIP_36639	0,848	0,926829268	0.935065	-0,00020642	0,00020642	Os05g0351500	Sgf11, transcriptional regulation family protein. (Os05t0351500-01)
TIP_535	0,373015873	0,329268293	0.293333	-6,15E-06	0,00000615	Os01g0151400	Similar to Gamma-glutamyl transferase. (Os01t0151400-01)
