# Supplementary material for: Transposons are important contributors to gene expression variability under selection in rice populations
Source: eLife. 2023 Jul 19;12:RP86324. doi: 10.7554/eLife.86324 (PMC10393045; doi:10.7554/eLife.86324)
Supplement: Supplementary file 6. — Only the haplotypes that cleared the p-value cutoff of 0.01 were reported to be under selection. [file elife-86324-supp6.xlsx]

## Sheet: Sheet1
		Japonica				Indica
Gene	Haplotype	pi		H12		pi		H12
		mean	p-val	mean	p-val	mean	p-val	mean	p-val
OsEG2	HapA	9.5228e-05	0.0009	0.946711	0.0009	0.0018	0.001	0.779	0.0009
	HapB	0.00174769	0.006	0.604855	0.2	0.0017	0.0009	0.69	0.0009
OsGAP	HapA	0.00022	0.0009	0.956512	0.0009	Not an eQTL in indica
	HapB	0.0028	0.0009	0.613437	0.0489
OsMPH1	HapA	2.68782e-05	0.0009	0.957586	0.0009	0.0002	0.0009	0.916437	0.0009
	HapB	0.00175	0.28	0.522059	1	0.0019	0.41	0.414901	0.96
